# Supplementary material for: Heteroannulation of bicyclobutane derivativesviaAu-catalyzed hydration to enol ethers and intramolecular cyclization giving spirocyclobutanes
Source: Royal Society of Chemistry journal article supplement (doi:10.1039/d3cc01955a), 2023-01-01
Supplement: d3cc01955a1.pdf [file d3cc01955a1.pdf]

## *Supporting Information*

### **Heteroannulation of bicyclobutane derivatives via Au-catalyzed hydration to enol ethers and intramolecular cyclization giving spirocyclobutanes**

Masaharu Takatsuki, Hiroshi Aoyama, Kenichi Murai, Mitsuhiro Arisawa\*, Makoto Sako\*

Graduate School of Pharmaceutical Sciences, Osaka University,  
Yamada-oka 1-6, Suita, Osaka 565-0871, Japan.

E-mail: arisaw@phs.osaka-u.ac.jp; sako-m@phs.osaka-u.ac.jp

| Contents |                                     |     |
|----------|-------------------------------------|-----|
| 1.       | General Information                 | S2  |
| 2.       | Optimization of Reaction Conditions | S3  |
| 3.       | Mechanistic Studies                 | S5  |
| 4.       | Experimental Procedure              | S6  |
| 5.       | References                          | S19 |
| 6.       | X-ray Crystallographic Analysis     | S20 |
| 7.       | NMR Spectra                         | S24 |

## 1. General Information

- $^1\text{H}$ ,  $^{13}\text{C}$ , NMR spectra were measured by JEOL ECS 300, JEOL JNM-ECS 400 or JEOL JNMLA 500 spectrometers.

$^1\text{H}$  NMR spectra are reported as follows: chemical shift in ppm relative to the chemical shift of tetramethylsilane (TMS) at 0 ppm, integration, multiplicities (s = singlet, d = doublet, t = triplet, q = quartet, m = multiplet), and coupling constants (Hz).

$^{13}\text{C}$  NMR spectra are reported as follows: chemical shift in ppm relative to the chemical shift of triplet for  $\text{CDCl}_3$  at 77 ppm, septet for acetone- $d_6$  at 29.8 ppm, multiplicities (s = singlet, d = doublet, t = triplet, q = quartet, m = multiplet), and coupling constants (Hz).

$\text{C}_6\text{F}_6$  (singlet at -164.9 ppm) was used as an external standard for  $^{19}\text{F}$  NMR.

- MALDI-MS spectra were obtained with JMS-S3000 (JEOL).
- Melting points were measured by BÜCHI B-545.
- Column chromatography on  $\text{SiO}_2$  was performed with Kanto Chemical Silica Gel 60 (spherical, 63-210  $\mu\text{m}$  or spherical, 40-50  $\mu\text{m}$ ).
- Commercially available organic and inorganic compounds were used without further purification.

## 2. Optimization of Reaction Conditions

### General procedure for Table S1-S4

A flame dried test tube equipped with magnetic stirring bar was charged with Au catalyst (4.5  $\mu\text{mol}$ , 3.0 mol%) and Ag additive (4.5  $\mu\text{mol}$ , 3.0 mol%) under  $\text{N}_2$  in glovebox. Dry solvent (3.0 mL, 0.05 M) and nucleophiles,  $\text{H}_2\text{O}$  or amines, (0.30 mmol, 2.0 eq. or specified eq.) was added to the mixture at ambient temperature. The solution was stirred at 25  $^\circ\text{C}$  for 5 min, and then the compound **1a** (0.15 mmol) was added. After specified reaction time, the mixture was filtered through short pad of silica gel. The yields of compounds **2** and **2'** were determined by  $^1\text{H}$  NMR.

Table S1. Screening of Au catalysts and additives

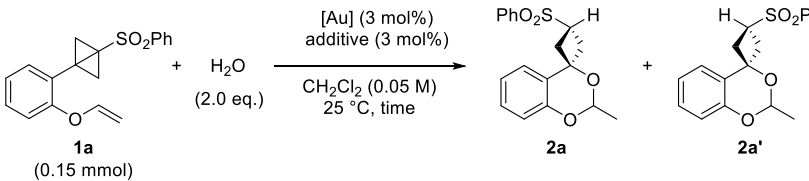

| entry           | [Au]                       | additive           | time | <b>2a/2a'</b> (% , <i>dr</i> ) <sup>a</sup> |
|-----------------|----------------------------|--------------------|------|---------------------------------------------|
| 0               | IPrAuNTf <sub>2</sub>      | ----               | 2 h  | 51%, (1.5 : 1)                              |
| 1               | IPrAuNTf <sub>2</sub>      | ----               | 13 h | 67%, (1.3 : 1)                              |
| 2               | IPrAu(MeCN)BF <sub>4</sub> | ----               | 20 h | 16%, (0.81 : 1)                             |
| 3               | IPrAuCl                    | AgNTf <sub>2</sub> | 13 h | 56%, (0.79 : 1)                             |
| 4               | XPhosAuCl                  | AgOTf              | "    | 83%, (0.90 : 1)                             |
| 5               | PPh <sub>3</sub> AuCl      | AgOTf              | "    | 86%, (0.90 : 1)                             |
| 6               | PPh <sub>3</sub> AuCl      | AgOAc              | "    | N.D. <sup>b</sup>                           |
| 7               | PPh <sub>3</sub> AuCl      | AgBF <sub>4</sub>  | "    | 34%, (0.51 : 1)                             |
| 8               | PPh <sub>3</sub> AuCl      | AgSbF <sub>6</sub> | "    | 54%, (0.80 : 1)                             |
| 9               | PPh <sub>3</sub> AuCl      | AgNTf <sub>2</sub> | "    | 76%, (0.80 : 1)                             |
| 10 <sup>c</sup> | ----                       | AgOTf              | "    | 57%, (0.67 : 1)                             |
| 11              | ----                       | ----               | "    | N.R. <sup>d</sup>                           |

<sup>a</sup> NMR yield using 1,3,5-trimethoxybenzene as an internal standard material.

<sup>b</sup> not detected. <sup>c</sup> used 6 mol% of additive. <sup>d</sup> no reaction.

Table S2. Screening of solvents

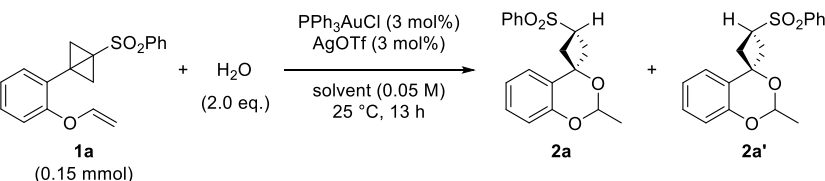

| entry | solvent                  | <b>2a/2a'</b> (% , <i>dr</i> ) <sup>a</sup> |
|-------|--------------------------|---------------------------------------------|
| 0     | $\text{CH}_2\text{Cl}_2$ | 86%, (0.90 : 1)                             |
| 1     | $\text{CHCl}_3$          | 79%, (0.81 : 1)                             |
| 2     | PhMe                     | 59%, (0.54 : 1)                             |
| 3     | THF                      | N.D. <sup>b</sup>                           |
| 4     | 1,4-dioxane              | 52%, (0.55 : 1)                             |
| 5     | $\text{MeNO}_2$          | 85%, (1.16 : 1)                             |
| 6     | EtOAc                    | 73%, (0.48 : 1)                             |
| 7     | MeCN                     | 17%, (0.32 : 1)                             |
| 8     | DMF                      | N.R. <sup>c</sup>                           |

<sup>a</sup> NMR yield using 1,3,5-trimethoxybenzene as an internal standard material.

<sup>b</sup> not detected. <sup>c</sup> no reaction.

Table S3. Screening of H<sub>2</sub>O loading

| entry | X  | 2a/2a' (% <i>, dr</i> )* |
|-------|----|--------------------------|
| 0     | 2  | 86%, (0.90 : 1)          |
| 1     | 1  | 78%, (0.92 : 1)          |
| 2     | 5  | 45%, (0.59 : 1)          |
| 3     | 10 | 10%, (0.45 : 1)          |

\*NMR yield using 1,3,5-trimethoxybenzene as an internal standard material.

Table S4. Screening nucleophiles

| entry | nucleophiles         | results         |
|-------|----------------------|-----------------|
| 1     | H <sub>2</sub> N-Boc | complex mixture |
| 2     | H <sub>2</sub> N-Ts  | complex mixture |
| 3     | H <sub>2</sub> N-Ms  | complex mixture |
| 4     | aniline              | complex mixture |

### 3. Mechanistic Studies

#### 3-1. Reaction using deuterium oxide

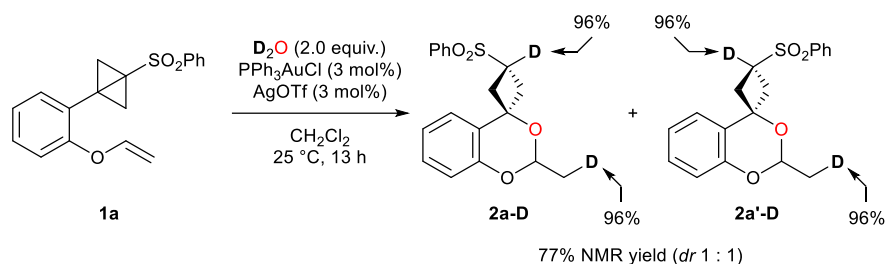

A flame dried test tube equipped with magnetic stirring bar was charged with  $PPh_3AuCl$  (2.2 mg, 4.5  $\mu mol$ , 3.0 mol%) and  $AgOTf$  (1.2 mg, 4.5  $\mu mol$ , 3.0 mol%) under  $N_2$  in glovebox. Dry  $CH_2Cl_2$  (3.0 mL, 0.05 M) and  $D_2O$  (5.4  $\mu L$ , 0.30 mmol, 2.0 eq.) was added to the mixture at ambient temperature. The solution was stirred at  $25^\circ C$  for 5 min, and then the compound **1a** (0.15 mmol) was added. After 13 h, the mixture was filtered through short pad of silica gel. The obtained residue was purified by flash column chromatography on silica gel (hexane/EtOAc = 10:1) to give compounds **2a-D** and **2a'-D**.

#### 3-2. NMR time course experiment

We conducted a time-course experiment using NMR to collect any information to shed light on the reaction mechanism. A solution of **1a** (0.15 mmol),  $H_2O$  (0.30 mmol) and 3 mol% of  $IPrAuNTf_2$  in  $CDCl_3$  was filled in a NMR tube. We recorded the  $^1H$  NMR spectra of this reaction mixture at 10 and 30 min and at 1, 2, 3, 6, and 9 h after the start of the reaction and compared each spectrum with those of standard samples of **1a**, **2a** and **2a'**.

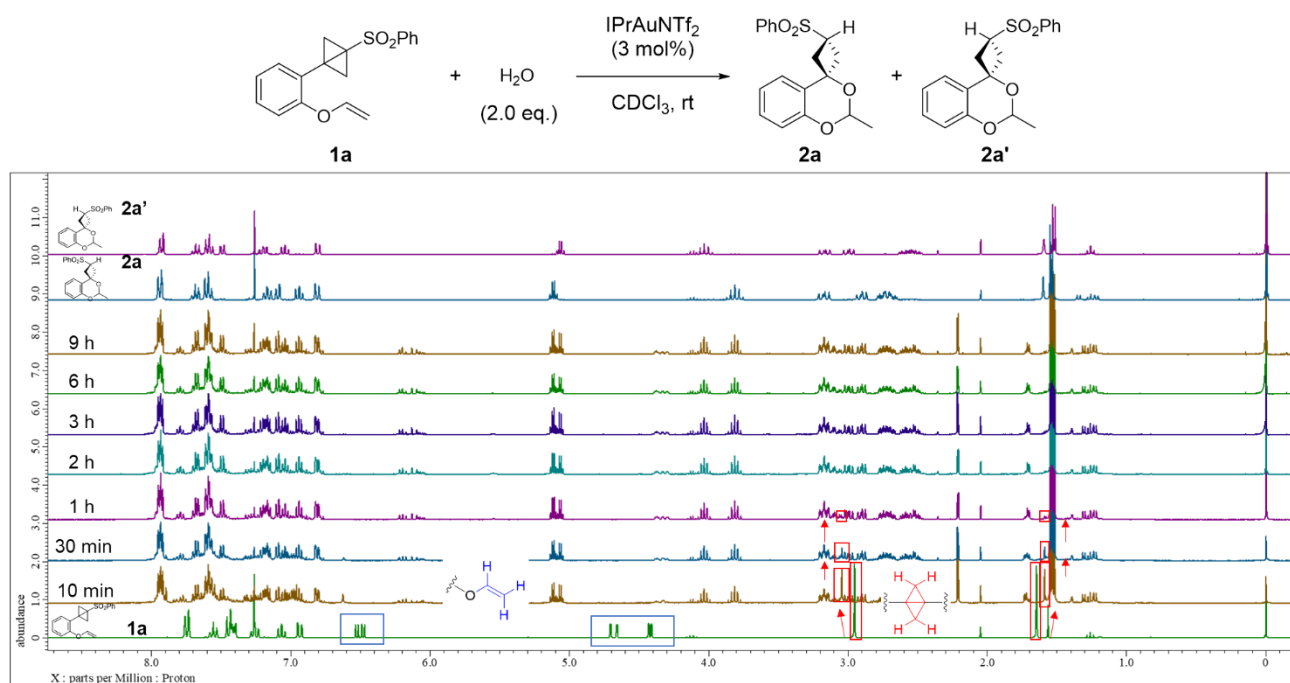

## 4. Experimental procedure

### 4-1. Preparation of starting materials

#### General procedure of Negishi coupling of bicyclobutane and aryl iodide

Starting materials **1** were prepared through slightly modified procedure of reported method reported by Anderson et al.<sup>1</sup>

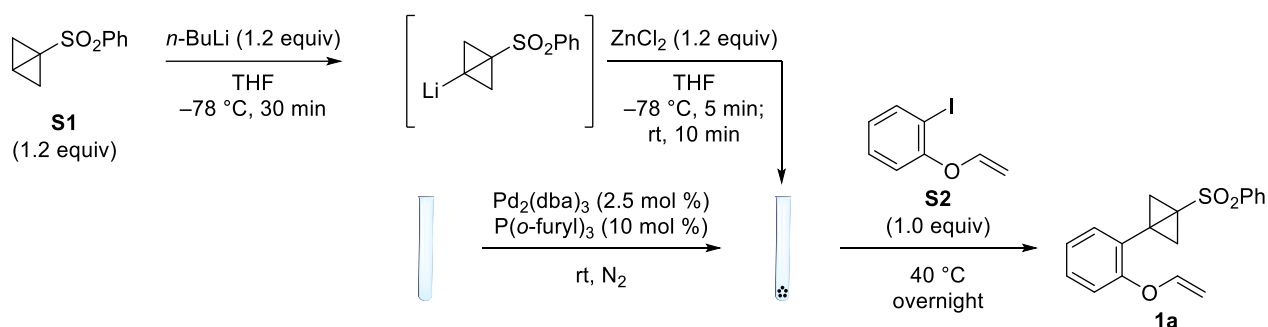

Under a nitrogen atmosphere, to a solution of BCB **S1** (1.00 g, 5.15 mmol, 1.2 eq.) in THF (10.3 mL, 0.50 M) was added *n*-BuLi (1.6 M in hexane, 3.43 mL, 1.2 eq.) dropwise at  $-78\text{ }^{\circ}\text{C}$ . The mixture was stirred for 30 min, then a solution of  $\text{ZnCl}_2$  (1.0 M in THF, 5.2 mL, 1.2 eq.) was added, and the reaction was stirred for 5 min at  $-78\text{ }^{\circ}\text{C}$  before bringing to rt, and stirred for a further 10 min. The solution of organozinc was transferred *via* cannula to a vial containing  $\text{Pd}_2(\text{dba})_3$  (98.2 mg, 107  $\mu\text{mol}$ , 2.5 mol%),  $\text{P}(o\text{-furyl})_3$  (99.6 mg, 429  $\mu\text{mol}$ , 10 mol%) and aryl iodide **S2** (1.06 g, 4.29 mmol, 1.0 eq.). The reaction mixture was stirred overnight at  $40\text{ }^{\circ}\text{C}$ , then it was filtrated through celite using EtOAc. The filtrate was washed with water, extracted with EtOAc, washed with brine, dried over  $\text{Na}_2\text{SO}_4$ , filtered, and concentrated under reduced pressure. The crude mixture was purified by flash chromatography (hexane/EtOAc = 10:1 and toluene/hexane/EtOAc = 20:1:1) to give **1a** as pale yellow solid (818 mg, 2.62 mmol, 61% yield).

#### 1-(phenylsulfonyl)-3-(2-(vinylloxy)phenyl)bicyclo[1.1.0]butane (**1a**)

61% yield, pale yellow solid, m.p.  $57.0 - 58.0\text{ }^{\circ}\text{C}$

$^1\text{H NMR}$  (301 MHz, Acetone- $d_6$ )  $\delta$  7.76 – 7.74 (m, 2H), 7.66 (tt,  $J = 7.3, 1.4\text{ Hz}$ , 1H), 7.56–7.52 (m, 2H), 7.45 (dd,  $J = 7.8, 1.4\text{ Hz}$ , 1H), 7.33–7.28 (m, 1H), 7.08 (td,  $J = 7.6, 1.1\text{ Hz}$ , 1H), 7.01 (dd,  $J = 8.0, 1.1\text{ Hz}$ , 1H), 6.66 (dd,  $J = 13.6, 6.0\text{ Hz}$ , 1H), 4.66 (dd,  $J = 13.6, 1.5\text{ Hz}$ , 1H), 4.43 (dd,  $J = 6.0, 1.5\text{ Hz}$ , 1H), 2.94 (s, 2H), 1.66 (s, 2H).

$^{13}\text{C}\{^1\text{H}\}\text{NMR}$  (101 MHz,  $\text{CDCl}_3$ )  $\delta$  155.9, 148.3, 140.7, 132.9, 129.8, 128.8, 128.7, 127.3, 123.4, 120.6, 117.3, 95.2, 37.7, 33.8, 28.1.

**HRMS (MALDI)**  $m/z$  calcd for  $\text{C}_{18}\text{H}_{16}\text{O}_3\text{NaS}$  ( $[\text{M}+\text{Na}]^+$ ): 335.0712, found 335.0710.

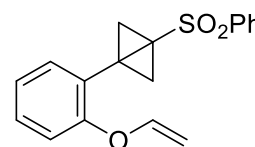

---

**1-(5-methoxy-2-(vinylloxy)phenyl)-3-(phenylsulfonyl)bicyclo[1.1.0]butane (1b)**

69% yield, white solid, m.p. 69.7 – 70.3 °C

<sup>1</sup>H NMR (400 MHz, Acetone-*d*<sub>6</sub>) δ 7.78-7.75 (m, 2H), 7.69-7.64 (m, 1H), 7.58-7.54 (m, 2H), 7.01 (d, *J* = 3.1 Hz, 1H), 6.94 (d, *J* = 8.8 Hz, 1H), 6.86 (dd, *J* = 8.8, 3.1 Hz, 1H), 6.58 (dd, *J* = 13.7, 6.1 Hz, 1H), 4.50 (dd, *J* = 13.7, 1.7 Hz, 1H), 4.31 (dd, *J* = 6.1, 1.7 Hz, 1H), 3.76 (s, 3H), 2.91 (s, 2H), 1.66 (s, 2H).

<sup>13</sup>C{<sup>1</sup>H} NMR (101 MHz, Acetone-*d*<sub>6</sub>) δ 155.7, 150.1, 149.7, 141.5, 133.3, 129.2, 127.2, 122.5, 119.5, 114.7, 114.0, 92.8, 55.1, 37.3, 34.0, 27.4.

sHRMS (MALDI) *m/z* calcd for C<sub>19</sub>H<sub>18</sub>O<sub>4</sub>NaS ([M+Na]<sup>+</sup>): 365.0818, found 365.0818.

---

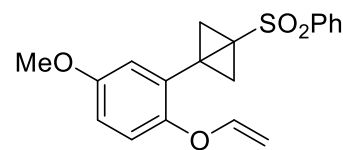

---

**1-(5-methyl-2-(vinylloxy)phenyl)-3-(phenylsulfonyl)bicyclo[1.1.0]butane (1c)**

36% yield, colorless oil.

<sup>1</sup>H NMR (400 MHz, Acetone-*d*<sub>6</sub>) δ 7.74-7.72 (m, 2H), 7.67-7.63 (m, 1H), 7.55-7.51 (m, 2H), 7.19 (d, *J* = 1.8 Hz, 1H), 7.10 (dd, *J* = 8.2, 1.8 Hz, 1H), 6.89 (d, *J* = 8.2 Hz, 1H), 6.61 (dd, *J* = 13.6, 6.2 Hz, 1H), 4.60 (dd, *J* = 13.6, 1.5 Hz, 1H), 4.37 (dd, *J* = 6.2, 1.5 Hz, 1H), 2.93 (s, 2H), 1.63 (s, 2H).

<sup>13</sup>C{<sup>1</sup>H} NMR (101 MHz, Acetone-*d*<sub>6</sub>) δ 154.6, 149.9, 142.1, 134.0, 133.5, 131.1, 130.1, 129.9, 128.0, 121.4, 118.2, 94.6, 37.7, 34.6, 28.3, 20.6.

HRMS (MALDI) *m/z* calcd for C<sub>19</sub>H<sub>18</sub>O<sub>3</sub>NaS ([M+Na]<sup>+</sup>): 349.0869, found 349.0869.

---

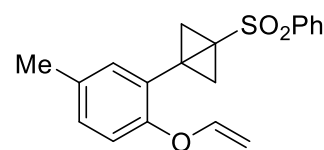

---

**1-(5-fluoro-2-(vinylloxy)phenyl)-3-(phenylsulfonyl)bicyclo[1.1.0]butane (1d)**

61% yield, colorless oil.

<sup>1</sup>H NMR (301 MHz, CDCl<sub>3</sub>) δ 7.79-7.76 (m, 2H), 7.61-7.55 (m, 1H), 7.49-7.44 (m, 2H), 7.10 (dd, *J* = 9.0, 2.7 Hz, 1H), 6.98-6.87 (m, 2H), 6.47 (dd, *J* = 13.8, 6.2 Hz, 1H), 4.63 (dd, *J* = 13.8, 1.9 Hz, 1H), 4.40 (dd, *J* = 6.2, 1.9 Hz, 1H), 2.95 (s, 2H), 1.66 (s, 2H).

<sup>13</sup>C{<sup>1</sup>H} NMR (76 MHz, Acetone-*d*<sub>6</sub>) δ 159.1 (d, *J*<sub>C-F</sub> = 239.9 Hz, aromatic C<sub>α</sub>-F), 152.9 (d, *J*<sub>C-F</sub> = 2.2 Hz, aromatic C<sub>δ</sub>), 150.0, 142.1, 134.1, 130.1, 127.9, 124.4 (d, *J*<sub>C-F</sub> = 8.7 Hz, aromatic C<sub>γ</sub>), 120.1 (d, *J*<sub>C-F</sub> = 8.7 Hz, aromatic C<sub>γ</sub>), 116.9 (d, *J*<sub>C-F</sub> = 24.6 Hz, aromatic C<sub>β</sub>), 115.9 (d, *J*<sub>C-F</sub> = 23.1 Hz, aromatic C<sub>β</sub>), 95.0, 38.3, 35.3, 27.6.

<sup>19</sup>F NMR (283 MHz, Acetone-*d*<sub>6</sub>) δ -121.3.

HRMS (MALDI) *m/z* calcd for C<sub>18</sub>H<sub>15</sub>FO<sub>3</sub>NaS ([M+Na]<sup>+</sup>): 353.0618, found 353.0613.

---

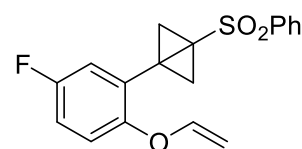

---

**1-(5-nitro-2-(vinylloxy)phenyl)-3-(phenylsulfonyl)bicyclo[1.1.0]butane (1e)**Compound **S3** was prepared through a reported method.<sup>2</sup>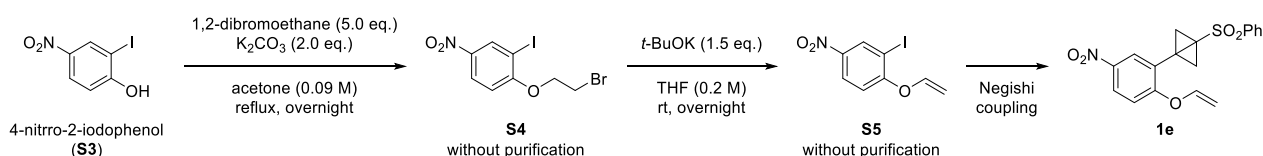

To a solution of 4-nitro-2-iodophenol (**S3**, 375 mg, 2.90 mmol, 1.0 eq.) and 1,2-dibromoethane (734  $\mu$ L, 8.52 mmol, 5.0 eq.) in acetone (18.9 mL, 0.09 M) was added  $K_2CO_3$  (471 mg, 3.41 mmol, 2.0 eq.). The resulting mixture was stirred under reflux conditions for overnight. The reaction was quenched with water and extracted with  $CH_2Cl_2$ . The organic layer was washed with brine, dried over  $Na_2SO_4$ , and concentrated to get crude compound **S4**. To a solution of crude compound in THF (14.5 mL, 0.20 M) was added *t*-BuOK (390 mg, 3.48 mmol, 1.5 eq.) portionwise. The resulting mixture was stirred at room temperature for overnight. The reaction was quenched with sat.  $NH_4Cl$  aq. and extracted with EtOAc, dried over  $Na_2SO_4$ , and concentrated to get crude compound **S5**, which was used in next step without purification. Under a nitrogen atmosphere, to a solution of BCB **S1** (676 mg, 3.48 mmol, 1.2 eq.) in THF (10.3 mL, 0.50 M) was added *n*-BuLi (1.6 M in hexane, 2.17 mL, 1.2 eq.) dropwise at  $-78$  °C. The mixture was stirred for 30 min, then a solution of  $ZnCl_2$  (1.0 M in THF, 3.48 mL, 1.2 eq.) was added, and the reaction was stirred for 5 min at  $-78$  °C before bringing to rt, and stirred for a further 10 min. The solution of organozinc was transferred *via* cannula to a vial containing  $Pd_2(dba)_3$  (72.5  $\mu$ mol, 66.4 mg, 2.5 mol%),  $P(o\text{-furyl})_3$  (67.3 mg, 67.3  $\mu$ mol, 10 mol%) and aryl iodide **S5** (1.0 eq.). The reaction mixture was stirred overnight at 40 °C, then it was filtrated through celite using EtOAc. The filtrate was washed with water, extracted with EtOAc, washed with brine, dried over  $Na_2SO_4$ , filtered, and concentrated under reduced pressure. The crude mixture was purified by flash chromatography (hexane/EtOAc = 10:1 and toluene/hexane/EtOAc = 20:1:1) to give the BCB derivative **1e** as colorless oil (139 mg, 377  $\mu$ mol, 3 steps: 13% yield).

$^1H$  NMR (500 MHz, Acetone- $d_6$ )  $\delta$  8.24 (d,  $J$  = 2.8 Hz, 1H), 8.19 (dd,  $J$  = 9.0, 2.8 Hz, 1H), 7.80-7.78 (m, 2H), 7.68-7.64 (m, 1H), 7.58-7.54 (m, 2H), 7.27 (d,  $J$  = 9.0 Hz, 1H), 6.88 (dd,  $J$  = 13.3, 5.9 Hz, 1H), 5.01 (dd,  $J$  = 13.3, 1.7 Hz, 1H), 4.74 (dd,  $J$  = 5.9, 1.7 Hz, 1H), 3.12 (s, 2H), 1.79 (s, 2H).

$^{13}C\{^1H\}$  NMR (76 MHz, Acetone- $d_6$ )  $\delta$  160.5, 146.6, 142.9, 141.1, 133.5, 129.3, 127.2, 125.6, 124.4, 122.2, 115.6, 98.6, 37.5, 34.6, 26.9.

HRMS (MALDI)  $m/z$  calcd for  $C_{18}H_{15}NO_5NaS$  ( $[M+Na]^+$ ): 380.0563, found 380.0566.

**1-(3-chloro-2-(vinylloxy)phenyl)-3-(phenylsulfonyl)bicyclo[1.1.0]butane (1f)**

53% yield, colorless oil.

$^1H$  NMR (301 MHz,  $CDCl_3$ )  $\delta$  7.78-7.75 (m, 2H), 7.63-7.57 (m, 1H), 7.50-7.45 (m, 3H), 7.36 (dd,  $J$  = 8.0, 1.5 Hz, 1H), 7.13 (t,  $J$  = 8.0 Hz, 1H), 6.47 (dd,  $J$  = 13.9, 6.4 Hz, 1H), 4.27-4.18 (m, 2H), 2.87 (s, 2H), 1.67 (s, 2H).

$^{13}C\{^1H\}$  NMR (76 MHz, Acetone- $d_6$ )  $\delta$  151.4, 151.2, 142.1, 134.2, 130.5, 130.1, 128.9, 128.7, 128.0, 127.8, 126.8, 91.6, 38.7, 35.9, 27.3.

HRMS (MALDI)  $m/z$  calcd for  $C_{18}H_{15}O_3NaS$  ( $[M+Na]^+$ ): 369.0323, found 369.0326.

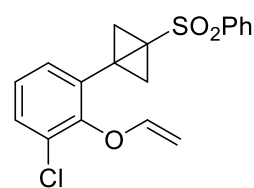

**2-(3-(phenylsulfonyl)bicyclo[1.1.0]butan-1-yl)-3-(vinylloxy)naphthalene (1g)**

42% yield, Light brown solid, m.p. 82.2-83.2 °C.

$^1H$  NMR (400 MHz, Acetone- $d_6$ )  $\delta$  7.95 (s, 1H), 7.83 (d,  $J$  = 8.2 Hz, 1H), 7.80 (d,  $J$  = 8.7 Hz, 1H), 7.60-7.55 (m, 2H), 7.60-7.55 (m, 1H), 7.50-7.40 (m, 5H), 6.83 (dd,  $J$  = 13.7, 6.0 Hz, 1H), 4.87 (dd,  $J$  = 13.7, 1.4 Hz, 1H), 4.57 (dd,  $J$  = 6.0, 1.4 Hz, 1H), 3.12 (s, 2H), 1.71 (s, 2H).

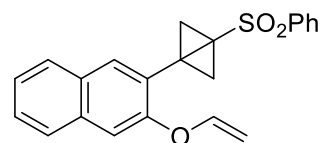



$^{13}\text{C}\{^1\text{H}\}$  NMR (101 MHz, Acetone- $d_6$ )  $\delta$  154.8, 148.7, 142.1, 134.5, 133.9, 130.9, 130.6, 129.9, 128.1, 128.1, 127.9, 127.5, 125.8, 122.2, 112.2, 96.6, 37.8, 34.9, 30.6.

HRMS (MALDI)  $m/z$  calcd for  $\text{C}_{22}\text{H}_{18}\text{O}_3\text{NaS}$  ( $[\text{M}+\text{Na}]^+$ ): 385.0869, found 385.0871.

**(Z)-1-(phenylsulfonyl)-3-(2-(prop-1-en-1-yloxy)phenyl)bicyclo[1.1.0]butane (1h)**

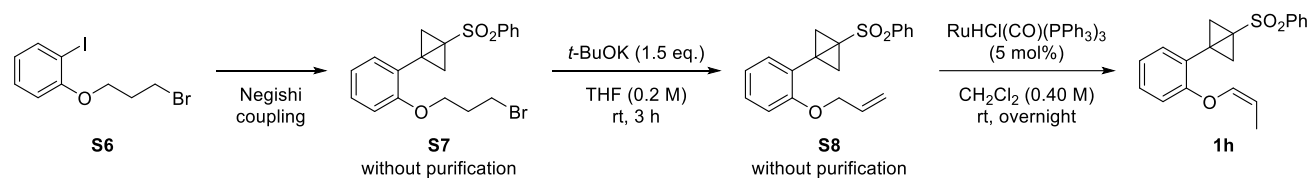

Under a nitrogen atmosphere, to a solution of BCB **S1** (820 mg, 4.22 mmol, 1.2 eq.) in THF (10.3 mL, 0.50 M) was added *n*-BuLi (1.6 M in hexane, 2.64 mL, 1.2 eq.) dropwise at  $-78^\circ\text{C}$ . The mixture was stirred for 30 min, then a solution of  $\text{ZnCl}_2$  (1.0 M in THF, 4.22 mL, 1.2 eq.) was added, and the reaction was stirred for 5 min at  $-78^\circ\text{C}$  before bringing to rt, and stirred for a further 10 min. The solution of organozinc was transferred *via* cannula to a vial containing  $\text{Pd}_2(\text{dba})_3$  (80.4 mg, 88.0  $\mu\text{mol}$ , 2.5 mol%),  $\text{P}(o\text{-furyl})_3$  (81.7 mg, 352  $\mu\text{mol}$ , 10 mol%) and 1-(3-bromopropoxy)-2-iodobenzene **S6** (1.20 g, 3.52 mmol, 1.0 eq.). The reaction mixture was stirred overnight at  $40^\circ\text{C}$ , then it was filtrated through celite using EtOAc. The filtrate was washed with water, extracted with EtOAc, washed with brine, dried over  $\text{Na}_2\text{SO}_4$ , filtered, and concentrated under reduced pressure. The mixture was filtered through a short pad of silica gel to get crude compound **S8** which was used in next step without purification. To a solution of crude compound **S8** in THF (17.6 mL, 0.20 M) was added *t*-BuOK (474 mg, 4.22 mmol, 1.5 eq.) portionwise. The resulting mixture was stirred at room temperature for overnight. The reaction was quenched with water and sat.  $\text{NH}_4\text{Cl}$  aq. and extracted with EtOAc, dried over  $\text{Na}_2\text{SO}_4$ , and concentrated to get crude compound **S8** which was used in next step without purification. Then to a solution of crude compound **S8** in  $\text{CH}_2\text{Cl}_2$  (17.5 mL, 0.20 M) was added  $\text{RuHCl(CO)(PPh}_3)_3$  (166 mg, 0.175 mmol, 5 mol%). The resulting mixture was stirred at room temperature for overnight. The reaction mixture was filtered and combined filtrate was concentrated. The residue was purified by a silica gel column chromatography (hexane/EtOAc = 10:1 and toluene/hexane/EtOAc = 20:1:1) to get compound **1h** as colorless oil (200 mg, 613  $\mu\text{mol}$ , 3 steps: 40%).

$^1\text{H}$  NMR (400 MHz, Acetone- $d_6$ )  $\delta$  7.74-7.70 (m, 2H), 7.65-7.60 (m, 1H), 7.53-7.49 (m, 2H), 7.40-7.38 (m, 1H), 7.28-7.24 (m, 1H), 7.01-6.95 (m, 2H), 6.36 (dq,  $J = 6.5, 1.7$  Hz, 1H), 4.91-4.84 (m, 1H), 2.97 (s, 2H), 1.68 (dd,  $J = 6.5, 1.7$  Hz, 3H), 1.65 (s, 2H).

$^{13}\text{C}\{^1\text{H}\}$  NMR (101 MHz, Acetone- $d_6$ )  $\delta$  157.6, 142.2, 142.0, 133.9, 130.8, 130.0, 129.6, 127.9, 123.2, 120.9, 116.3, 107.6, 37.9, 34.4, 28.6, 9.6.

HRMS (MALDI)  $m/z$  calcd for  $\text{C}_{19}\text{H}_{18}\text{O}_3\text{NaS}$  ( $[\text{M}+\text{Na}]^+$ ): 349.0869, found 349.0867.

**1-((4-methoxyphenyl)sulfonyl)-3-(2-(vinylloxy)phenyl)bicyclo[1.1.0]butane (1i)**

65% yield, colorless oil.

$^1\text{H}$  NMR (400 MHz, Acetone- $d_6$ )  $\delta$  7.64-7.60 (m, 2H), 7.42-7.40 (m, 1H), 7.32-7.27 (m, 1H), 7.06 (td,  $J = 7.7, 1.2$  Hz, 1H), 7.02-6.98 (m, 3H), 6.64 (dd,  $J = 13.5, 6.2$  Hz, 1H), 4.65 (dd,  $J = 13.5, 1.6$  Hz, 1H), 4.42 (dd,  $J = 6.2, 1.6$  Hz, 1H), 3.87

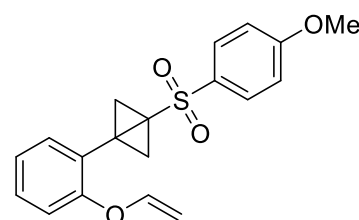

(s, 3H), 2.89 (s, 2H), 1.61 (s, 2H).

$^{13}\text{C}\{^1\text{H}\}$  NMR (101 MHz,  $\text{CDCl}_3$ )  $\delta$  163.2, 155.9, 148.3, 132.2, 129.8, 129.6, 128.6, 123.4, 120.9, 117.3, 114.0, 95.2, 55.6, 37.4, 34.5, 27.5.

**HRMS (MALDI)**  $m/z$  calcd for  $\text{C}_{19}\text{H}_{18}\text{O}_4\text{NaS}$  ( $[\text{M}+\text{Na}]^+$ ): 365.0818, found 365.0819.

---

**1-tosyl-3-(2-(vinylloxy)phenyl)bicyclo[1.1.0]butane (1j)**

45% yield, colorless oil.

$^1\text{H}$  NMR (400 MHz, Acetone- $d_6$ )  $\delta$  7.60 (d,  $J = 8.2$  Hz, 2H), 7.44-7.42 (m, 1H), 7.33-7.27 (m, 3H), 7.09-7.05 (m, 1H), 7.00 (d,  $J = 8.2$  Hz, 1H), 6.64 (dd,  $J = 13.7$ , 6.1 Hz, 1H), 4.65 (dd,  $J = 13.7$ , 1.5 Hz, 1H), 4.42 (dd,  $J = 6.1$ , 1.5 Hz, 1H), 2.91 (s, 2H), 2.40 (s, 3H), 1.62 (s, 2H).

$^{13}\text{C}\{^1\text{H}\}$  NMR (101 MHz,  $\text{CDCl}_3$ )  $\delta$  150.2, 141.8, 133.3, 133.0, 129.9, 129.1, 129.0, 127.6, 127.3, 127.1, 125.8, 91.4, 38.4, 38.2, 23.0, 12.6.

**HRMS (MALDI)**  $m/z$  calcd for  $\text{C}_{19}\text{H}_{18}\text{O}_3\text{NaS}$  ( $[\text{M}+\text{Na}]^+$ ): 349.0869, found 349.0866.

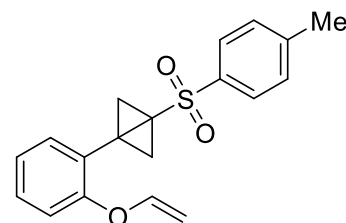

---

**1-(3-(phenylsulfonyl)bicyclo[1.1.0]butan-1-yl)-2-(vinylloxy)naphthalene (1k)**

57% yield, white solid, m.p. 70.7 – 72.7 °C.

$^1\text{H}$  NMR (301 MHz,  $\text{CDCl}_3$ )  $\delta$  8.21 (d,  $J = 8.6$  Hz, 1H), 7.94-7.90 (m, 2H), 7.82 (d,  $J = 8.6$  Hz, 2H), 7.59-7.46 (m, 4H), 7.43-7.38 (m, 1H), 7.31-7.28 (m, 1H), 6.76 (dd,  $J = 13.9$ , 6.0 Hz, 1H), 4.96 (dd,  $J = 13.9$ , 1.5 Hz, 1H), 4.60 (dd,  $J = 6.0$ , 1.5 Hz, 1H), 2.85 (s, 2H), 1.70 (s, 2H).

$^{13}\text{C}\{^1\text{H}\}$  NMR (76 MHz, Acetone- $d_6$ )  $\delta$  152.8, 148.3, 143.0, 135.1, 133.1, 130.6, 130.0, 129.3, 128.7, 127.2, 127.0, 124.5, 124.2, 116.7, 114.1, 95.8, 37.6, 34.8, 28.1.

**HRMS (MALDI)**  $m/z$  calcd for  $\text{C}_{22}\text{H}_{18}\text{O}_3\text{NaS}$  ( $[\text{M}+\text{Na}]^+$ ): 385.0869, found 385.0868.

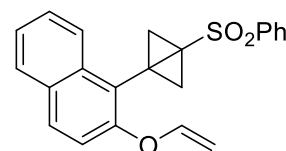

---

**2-(3-(phenylsulfonyl)bicyclo[1.1.0]butan-1-yl)-3-(vinylloxy)pyridine (1l)**

77% yield, brown oil.

$^1\text{H}$  NMR (301 MHz, Acetone- $d_6$ )  $\delta$  8.20-8.18 (m, 1H), 7.66-7.61 (m, 3H), 7.51-7.46 (m, 2H), 7.37 (d,  $J = 8.3$ , 1H), 7.28-7.24 (m, 1H), 6.64 (dd,  $J = 13.7$ , 5.9 Hz, 1H), 4.75 (dd,  $J = 13.7$ , 1.7 Hz, 1H), 4.53 (dd,  $J = 5.9$ , 1.7 Hz, 1H), 3.28 (s, 2H), 1.78 (s, 2H).

$^{13}\text{C}\{^1\text{H}\}$  NMR (101 MHz,  $\text{CDCl}_3$ )  $\delta$  152.5, 147.5, 143.9, 142.0, 140.6, 133.0, 128.9, 127.3, 124.1, 122.8, 97.1, 38.3, 35.9, 29.3.

**HRMS (MALDI)**  $m/z$  calcd for  $\text{C}_{17}\text{H}_{16}\text{NO}_3\text{S}$  ( $[\text{M}+\text{H}]^+$ ): 314.0845, found 314.0849.

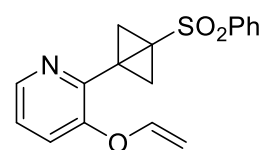

---

***N,N*-diisopropyl-3-(2-(vinylloxy)phenyl)bicyclo[1.1.0]butane-1-carboxamide (1m)**

83% yield, yellow oil.

$^1\text{H}$  NMR (500 MHz, Acetone- $d_6$ )  $\delta$  7.34 (dd,  $J = 7.7$ , 1.4 Hz, 1H), 7.19-7.15 (m, 1H), 7.03-7.00 (m, 1H), 6.92-6.91 (m, 1H), 6.62 (dd,  $J = 13.7$ , 6.0 Hz, 1H), 4.81 (br, 1H), 4.65 (dd,  $J = 13.7$ , 1.7 Hz, 1H), 4.41 (dd,  $J = 6.0$ , 1.7 Hz, 1H), 3.39 (br, 1H), 2.71 (s, 2H), 1.33

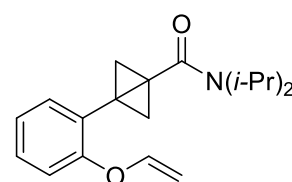

(s, 2H), 1.23 (d,  $J = 6.9$  Hz, 12H).

$^{13}\text{C}\{^1\text{H}\}$  NMR (126 MHz, Acetone- $d_6$ )  $\delta$  167.0, 156.5, 149.8, 131.8, 128.2, 125.9, 123.8, 117.3, 95.1, 49.9, 46.2, 37.8, 25.5, 21.4, 21.1, 20.1.

**HRMS (MALDI)**  $m/z$  calcd for  $\text{C}_{19}\text{H}_{26}\text{NO}_2$  ( $[\text{M}+\text{H}]^+$ ): 300.1958, found 300.1956.

### 1-(2-ethynylphenyl)-3-(phenylsulfonyl)bicyclo[1.1.0]butane (**3a**)

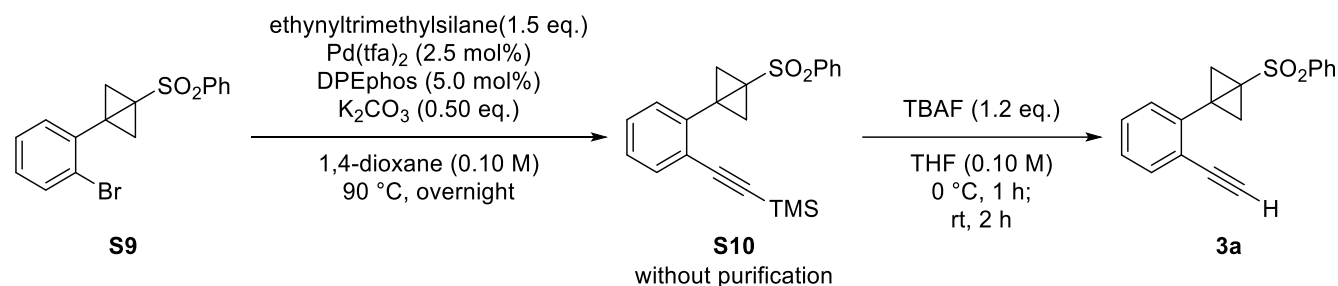

A flame dried test tube equipped with magnetic stirring bar was charged with the compound **S9** (460 mg, 1.32 mmol, 1.0 eq.),  $\text{K}_2\text{CO}_3$  (91 mg, 0.66 mmol, 0.50 eq.), DPEphos (35.5 mg, 66  $\mu\text{mol}$ , 5 mol%) and  $\text{Pd}(\text{tfa})_2$  (10.9 mg, 33  $\mu\text{mol}$ , 2.5 mol%) under  $\text{N}_2$  and dry 1,4-dioxane (13 mL, 0.10 M) was added. To a solution added ethynyltrimethylsilane (270  $\mu\text{L}$ , 1.98 mmol, 1.5 eq.), then the mixture was stirred at 90 °C overnight. After completion of the reaction, the mixture was filtered and, concentrated to afford crude compound **S10**. To a solution of crude compound **S10** in THF (13.2 mL, 0.10 M) added TBAF (1.56 mL, 1.58 mmol, 1.0 M in THF solution, 1.2 eq.). The resulting mixture was stirred at 0 °C for 1 h followed by further stirring for 2 h at room temperature. The reaction mixture was quenched with water and extracted with  $\text{CH}_2\text{Cl}_2$ . The combined organic layer dried over anhydrous  $\text{Na}_2\text{SO}_4$ , filtered, and concentrated. The residue was purified by flash column chromatography on silica gel (hexane/EtOAc = 10:1) to give compound **3a** as yellow oil (160 mg, 2 steps : 41%).

$^1\text{H}$  NMR (301 MHz, Acetone- $d_6$ )  $\delta$  7.86-7.82 (m, 2H), 7.73-7.67 (m, 1H), 7.64-7.57 (m, 3H), 7.50 (dd,  $J = 7.6, 1.6$  Hz, 1H), 7.38 (td,  $J = 7.6, 1.6$  Hz, 1H), 7.31 (td,  $J = 7.6, 1.6$  Hz, 1H), 3.83 (s, 1H), 3.00 (s, 2H), 1.79 (s, 2H).

$^{13}\text{C}\{^1\text{H}\}$  NMR (76 MHz, Acetone- $d_6$ )  $\delta$  142.6, 134.7, 134.2, 134.2, 130.1, 129.5, 128.8, 128.2, 127.9, 124.1, 83.5, 83.0, 39.2, 36.1, 30.4.

**HRMS (MALDI)**  $m/z$  calcd for  $\text{C}_{18}\text{H}_{14}\text{O}_2\text{NaS}$  ( $[\text{M}+\text{Na}]^+$ ): 317.0607, found 317.0600.

### 1-(2-(phenylethynyl)phenyl)-3-(phenylsulfonyl)bicyclo[1.1.0]butane (**3b**)

A flame dried test tube equipped with magnetic stirring bar was charged with a compound **S9** (348 mg, 1.0 mmol, 1.0 eq.), TEA (560  $\mu\text{L}$ , 4.0 mmol, 4.0 eq.), CuI (38 mg, 0.20 mmol, 20 mol%) and  $(\text{PPh}_3)_2\text{PdCl}_2$  (70 mg, 0.10 mmol, 10 mol%) under  $\text{N}_2$  and dry DMF (10 mL, 0.10 M) was added. To the solution added ethynylbenzene (164  $\mu\text{L}$ , 1.5 mmol, 1.5 eq.), then the mixture was stirred at 90 °C overnight. After completion of the reaction, the mixture was filtered and concentrated. The residue purified by flash column chromatography on silica gel (hexane/EtOAc = 10:1) to get **3b** as brown oil (209 mg, 564  $\mu\text{mol}$ , 56%).

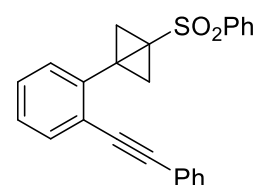

$^1\text{H}$  NMR (400 MHz, Acetone- $d_6$ )  $\delta$  7.85 (d,  $J = 8.2$  Hz, 2H), 7.69-7.64 (m, 2H), 7.59-7.55 (m, 5H), 7.44-7.39 (m,

3H), 7.37-7.31 (m, 2H), 3.10 (s, 2H), 1.86 (s, 2H).

$^{13}\text{C}\{^1\text{H}\}$  NMR (101 MHz, Acetone- $d_6$ )  $\delta$  142.4, 134.1, 134.0, 133.5, 132.0, 130.1, 129.9, 129.4, 129.2, 128.9, 128.2, 127.9, 124.7, 123.8, 94.0, 89.1, 39.0, 36.1, 30.7.

**HRMS (MALDI)**  $m/z$  calcd for  $\text{C}_{24}\text{H}_{18}\text{O}_2\text{NaS}$  ( $[\text{M}+\text{Na}]^+$ ): 393.0920, found 393.0920.

---

**1-(2-bromophenyl)-3-(phenylsulfonyl)bicyclo[1.1.0]butane (S9)**

83% yield, pale yellow oil.

$^1\text{H}$  NMR (301 MHz, Acetone- $d_6$ )  $\delta$  7.96-7.93 (m, 2H), 7.82 (dd,  $J = 7.9, 1.7$  Hz, 1H), 7.77-7.71 (m, 1H), 7.69-7.63 (m, 3H), 7.46-7.37 (m, 1H), 7.34-7.25 (m, 1H), 2.71 (s, 2H), 1.80 (s, 2H).

$^{13}\text{C}\{^1\text{H}\}$  NMR (101 MHz, Acetone- $d_6$ )  $\delta$  142.2, 133.5, 133.3, 131.8, 130.0, 129.6, 129.5, 127.7, 127.1, 125.8, 39.5, 34.8, 31.8.

**HRMS (MALDI)**  $m/z$  calcd for  $\text{C}_{16}\text{H}_{13}\text{BrO}_2\text{NaS}$  ( $[\text{M}+\text{Na}]^+$ ): 370.9712, found 370.9712.

---

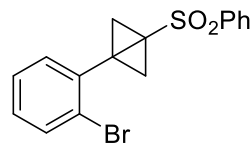

4-2. Heteroannulation of bicyclobutane derivatives via Au-catalyzed addition of water to enol ethers followed by intramolecular nucleophilic addition

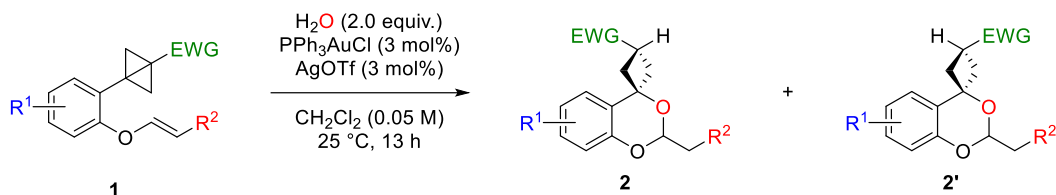

**General procedure**

A flame dried test tube equipped with magnetic stirring bar was charged with PPh<sub>3</sub>AuCl (2.2 mg, 4.5 μmol, 3.0 mol%) and AgOTf (1.2 mg, 4.5 μmol, 3.0 mol%) under N<sub>2</sub> in glovebox. Dry CH<sub>2</sub>Cl<sub>2</sub> (3.0 mL, 0.05 M) and H<sub>2</sub>O (5.4 μL, 0.30 mmol, 2.0 eq.) was added to the mixture at ambient temperature. The solution was stirred at 25 °C for 5 min, and then the compound **1** (0.15 mmol) was added. After 13 h, the mixture was filtered through short pad of silica gel. The obtained residue was purified by flash column chromatography on silica gel (hexane/EtOAc = 10:1) to give compounds **2** and **2'**.

**(3'r,4r)-2-methyl-3'-(phenylsulfonyl)spiro[benzo[d][1,3]dioxine-4,1'-cyclobutane] (**2a**)**

40% yield, pale yellow solid, m.p. 149.5-150.3 °C.

<sup>1</sup>H NMR (400 MHz, CDCl<sub>3</sub>) δ 7.94-7.92 (m, 2H), 7.70-7.66 (m, 1H), 7.61-7.57 (m, 2H), 7.49 (dd, *J* = 7.8, 1.4 Hz, 1H), 7.22-7.17 (m, 1H), 7.04 (td, *J* = 7.6, 1.1 Hz, 1H), 6.81 (dd, *J* = 8.0, 1.1 Hz, 1H), 5.06 (q, *J* = 5.1 Hz, 1H), 4.07-3.99 (m, 1H), 3.16 (dd, *J* = 13.1, 8.9 Hz, 1H), 2.99 (dd, *J* = 13.1, 8.9 Hz, 1H), 2.62-2.48 (m, 2H), 1.52 (d, *J* = 5.1 Hz, 3H).

<sup>13</sup>C{<sup>1</sup>H} NMR (101 MHz, CDCl<sub>3</sub>) δ 152.2, 138.0, 133.9, 129.4, 129.0, 128.2, 126.3, 125.6, 121.9, 116.3, 93.1, 75.3, 50.9, 39.5, 37.1, 20.7.

**HRMS (MALDI)** *m/z* calcd for C<sub>18</sub>H<sub>18</sub>O<sub>4</sub>NaS ([M+Na]<sup>+</sup>): 353.0818, found 353.0820.

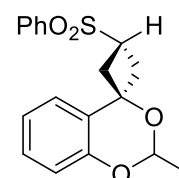

**(3's,4s)-2-methyl-3'-(phenylsulfonyl)spiro[benzo[d][1,3]dioxine-4,1'-cyclobutane] (**2a'**)**

45% yield, pale yellow solid, m.p. 139.1-141.1 °C.

<sup>1</sup>H NMR (400 MHz, CDCl<sub>3</sub>) δ 7.95-7.93 (m, 2H), 7.71-7.66 (m, 1H), 7.62-7.57 (m, 2H), 7.19-7.15 (m, 1H), 7.09 (dd, *J* = 7.8, 1.3 Hz, 1H), 6.94 (td, *J* = 7.6, 1.3 Hz, 1H), 6.81 (dd, *J* = 8.2 Hz, 1H), 5.11 (q, *J* = 5.0 Hz, 1H), 3.85-3.77 (m, 1H), 3.20-3.15 (m, 1H), 2.93-2.88 (m, 1H), 2.78-2.66 (m, 2H), 1.54 (d, *J* = 5.0 Hz, 3H).

<sup>13</sup>C{<sup>1</sup>H} NMR (101 MHz, CDCl<sub>3</sub>) δ 151.9, 137.9, 133.9, 129.4, 128.8, 128.4, 126.4, 123.3, 121.6, 116.8, 92.7, 72.1, 49.6, 40.4, 37.3, 20.7.

**HRMS (MALDI)** *m/z* calcd for C<sub>18</sub>H<sub>18</sub>O<sub>4</sub>NaS ([M+Na]<sup>+</sup>): 353.0818, found 353.0817.

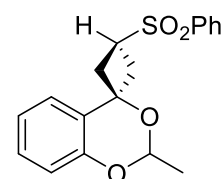

6-methoxy-2-methyl-3'-(phenylsulfonyl)spiro[benzo[*d*][1,3]dioxine-4,1'-cyclobutane] (**2b**, **2b'**) (diastereomixture)  
60% yield (**2b**:**2b'** = 0.80:1), colorless oil.

<sup>1</sup>H NMR (301 MHz, CDCl<sub>3</sub>) δ 7.91-7.88 (m, 2H), 7.68-7.61 (m, 1H), 7.58-7.52 (m, 2H), 7.07 (d, *J* = 2.4 Hz, 0.53H), 6.76-6.68 (m, 2H), 6.60 (m, 0.41H), 5.02 (q, *J* = 4.7 Hz, 0.45H), 4.97 (q, *J* = 5.0 Hz, 0.58H), 4.00 (quin., *J* = 8.6 Hz, 0.63H), 3.79 (m, 2.3H), 3.71 (s, 1.2H), 3.13 (dd, *J* = 13.2, 8.6 Hz, 1H), 2.97 (dd, *J* = 13.2, 8.6 Hz, 0.55H), 2.85 (dd, *J* = 12.0, 8.6 Hz, 0.45H), 2.75-2.44 (m, 2H), 1.49-1.46 (m, 3H).

<sup>13</sup>C{<sup>1</sup>H} NMR (101 MHz, CDCl<sub>3</sub>) δ 154.3, 154.1, 146.1, 145.8, 137.8, 137.7, 133.8, 133.8, 129.3, 128.2, 128.1, 127.0, 126.1, 117.2, 117.0, 115.5, 113.6, 110.2, 109.1, 93.0, 92.6, 75.1, 72.0, 55.7, 50.7, 49.5, 40.3, 39.4, 37.1, 37.0, 20.6, 20.5.

HRMS (MALDI) *m/z* calcd for C<sub>19</sub>H<sub>20</sub>O<sub>5</sub>NaS ([M+Na]<sup>+</sup>): 383.0924, found 383.0925.

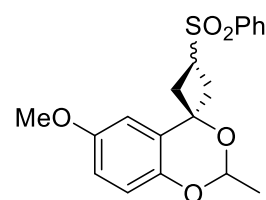

2,6-dimethyl-3'-(phenylsulfonyl)spiro[benzo[*d*][1,3]dioxine-4,1'-cyclobutane] (**2c**, **2c'**) (diastereomixture)

63% (**2c**:**2c'** = 1.2:1), colorless oil.

<sup>1</sup>H NMR (400 MHz, CDCl<sub>3</sub>) δ 7.95-7.91 (m, 2H), 7.70-7.65 (m, 1H), 7.60-7.56 (m, 2H), 7.17 (d, *J* = 1.4 Hz, 0.45H), 6.99-6.94 (m, 1H), 6.85 (d, *J* = 1.8 Hz, 0.55H), 6.69 (dd, *J* = 8.2, 1.8 Hz, 1H), 5.06 (q, *J* = 5.0 Hz, 0.55H), 5.01 (q, *J* = 5.0 Hz, 0.45H), 4.06-3.97 (m, 0.45H), 3.85-3.76 (m, 0.55H), 3.17-3.10 (m, 1H), 2.97-2.85 (m, 1H), 2.75-2.64 (m, 1H), 2.58-2.44 (m, 1H), 2.29-2.38 (s, 1.4H), 2.20-2.29 (s, 1.7H), 1.52 (m, 3H).

<sup>13</sup>C{<sup>1</sup>H} NMR (101 MHz, CDCl<sub>3</sub>) δ 150.1, 149.7, 137.9, 137.9, 133.9, 133.9, 131.2, 130.9, 129.7, 129.5, 129.4, 128.4, 128.3, 126.3, 126.0, 125.2, 123.5, 116.5, 116.1, 93.1, 92.6, 75.3, 72.1, 51.1, 49.6, 40.4, 39.5, 37.2, 37.1, 20.8, 20.8, 20.72, 20.65.

HRMS (MALDI) *m/z* calcd for C<sub>19</sub>H<sub>20</sub>O<sub>4</sub>NaS ([M+Na]<sup>+</sup>): 367.0975, found 37.0971.

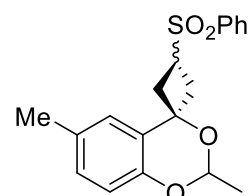

6-fluoro-2-methyl-3'-(phenylsulfonyl)spiro[benzo[*d*][1,3]dioxine-4,1'-cyclobutane] (**2d**, **2d'**) (diastereomixture)

92% yield (**2d**:**2d'** = 0.60:1), colorless oil.

<sup>1</sup>H NMR (400 MHz, CDCl<sub>3</sub>) δ 7.94-7.91 (m, 1H), 7.70-7.67 (m, 1H), 7.61-7.57 (m, 1H), 7.19 (dd, *J* = 8.9, 3.0 Hz, 0.62H), 6.92-6.85 (m, 1H), 6.81-6.78 (m, 0.38H), 6.78-6.73 (m, 1H), 5.06 (q, *J* = 5.2 Hz, 0.38H), 5.01 (q, *J* = 5.2 Hz, 0.62H), 4.07-3.98 (m, 0.62H), 3.82-3.73 (m, 0.38H), 3.18 (dd, *J* = 13.3, 9.2 Hz, 0.38H), 3.09 (dd, *J* = 13.3, 8.7 Hz, 0.62H), 2.98-2.88 (m, 1H), 2.76-2.48 (m, 2H), 1.53 (d, *J* = 5.0 Hz, 1.1H), 1.51 (d, *J* = 5.5 Hz, 1.9H).

<sup>13</sup>C{<sup>1</sup>H} NMR (101 MHz, CDCl<sub>3</sub>) δ 157.48 (d, *J*<sub>C-F</sub> = 241 Hz), 157.32 (d, *J*<sub>C-F</sub> = 241 Hz), 148.3, 148.0, 137.8, 137.7, 134.0, 129.4, 128.3, 128.2, 127.2 (d, *J*<sub>C-F</sub> = 6.7 Hz), 126.6 (d, *J*<sub>C-F</sub> = 6.7 Hz), 118.0 (d, *J*<sub>C-F</sub> = 7.7 Hz), 117.5 (d, *J*<sub>C-F</sub> = 7.7 Hz), 116.2 (d, *J*<sub>C-F</sub> = 23 Hz), 115.9 (d, *J*<sub>C-F</sub> = 23 Hz), 112.5 (d, *J*<sub>C-F</sub> = 24 Hz), 109.7 (d, *J*<sub>C-F</sub> = 24 Hz), 93.3, 92.9, 74.9, 72.0, 50.7, 49.4, 40.2, 39.4, 37.12, 37.09, 20.60, 20.54.

<sup>19</sup>F NMR (283 MHz, CDCl<sub>3</sub>) δ -123.642, -124.378.

HRMS (MALDI) *m/z* calcd for C<sub>18</sub>H<sub>17</sub>O<sub>4</sub>FNaS ([M+Na]<sup>+</sup>): 371.0724, found 371.0725.

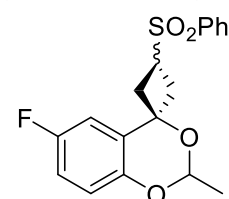

2-methyl-6-nitro-3'-(phenylsulfonyl)spiro[benzo[*d*][1,3]dioxine-4,1'-cyclobutane] (**2e**, **2e'**) (diastereomixture)

12% yield (**2e**:**2e'** = 0.36:1), colorless oil.

<sup>1</sup>H NMR (400 MHz, CDCl<sub>3</sub>) δ 8.35 (d, *J* = 2.7 Hz, 0.75H), 8.10-8.06 (m, 1H), 8.02 (d, *J* = 2.7 Hz, 0.25H), 7.96-7.93 (m, 2H), 7.73-7.68 (m, 1H), 7.63-7.59 (m, 2H), 6.92-6.88 (m, 1H), 5.21 (q, *J* = 5.0 Hz, 0.25H), 5.13 (q, *J* = 5.2 Hz, 0.70H), 4.10-4.01 (m, 0.72H), 3.94-3.85 (m, 0.22H), 3.27-3.21 (m, 0.23H), 3.16 (dd, *J* = 13.3, 8.7 Hz, 0.74H), 3.00-2.93 (m, 1H), 2.78-2.55 (m, 2H), 1.60 (d, *J* = 5.0 Hz, 0.70H), 1.57 (d, *J* = 5.0 Hz, 2.2H).

<sup>13</sup>C{<sup>1</sup>H} NMR (101 MHz, CDCl<sub>3</sub>) δ 157.3, 157.2, 142.1, 141.7, 137.6, 137.3, 134.2, 129.6, 129.5, 128.4, 126.6, 125.8, 124.9, 122.6, 119.8, 117.6, 117.2, 93.9, 93.6, 75.1, 72.2, 50.6, 48.9, 39.7, 39.3, 36.9, 36.7, 20.5, 20.4.

HRMS (MALDI) *m/z* calcd for C<sub>18</sub>H<sub>17</sub>NO<sub>6</sub>NaS ([M+Na]<sup>+</sup>): 398.0669, found 398.0666.

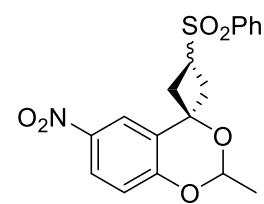

8-chloro-2-methyl-3'-(phenylsulfonyl)spiro[benzo[*d*][1,3]dioxine-4,1'-cyclobutane] (**2f**, **2f'**) (diastereomixture)

50% yield (**2f**:**2f'** = 0.67:1), colorless oil.

<sup>1</sup>H NMR (400 MHz, CDCl<sub>3</sub>) δ 7.93-7.89 (m, 2H), 7.69-7.65 (m, 1H), 7.60-7.55 (m, 2H), 7.43 (dd, *J* = 7.8, 1.4 Hz, 0.60H), 7.27-7.22 (m, 1H), 7.00-6.94 (m, 1H), 6.86 (t, *J* = 8.0 Hz, 0.40H), 5.15 (q, *J* = 5.2 Hz, 0.40H), 5.08 (q, *J* = 5.2 Hz, 0.6H), 4.06-3.97 (m, 0.6H), 3.83-3.74 (m, 0.4H), 3.20-3.12 (m, 1H), 3.01-2.87 (m, 1H), 2.75-2.48 (m, 2H), 1.59 (m, 3H).

<sup>13</sup>C{<sup>1</sup>H} NMR (101 MHz, CDCl<sub>3</sub>) δ 148.3, 148.0, 137.9, 137.7, 134.0, 134.0, 129.4, 129.4, 129.3, 128.4, 128.2, 127.9, 127.3, 124.8, 121.9, 121.6, 121.6, 121.1, 93.8, 93.5, 75.1, 72.1, 50.8, 49.4, 40.2, 39.5, 37.1, 20.6, 20.5.

HRMS (MALDI) *m/z* calcd for C<sub>18</sub>H<sub>17</sub>O<sub>4</sub>NaS ([M+Na]<sup>+</sup>): 387.0428, found 387.0424.

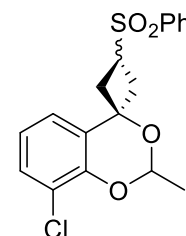

2'-methyl-3-(phenylsulfonyl)spiro[cyclobutane-1,4'-naphtho[2,3-*d*][1,3]dioxine] (**2g**, **2g'**) (diastereomixture)

48% yield (**2g**:**2g'** = 0.55:1), colorless oil.

<sup>1</sup>H NMR (301 MHz, CDCl<sub>3</sub>) δ 7.99-7.96 (m, 2.7H), 7.93 (s, 0.7H), 7.73-7.57 (m, 4.7H), 7.45-7.29 (m, 2.1H), 7.20 (s, 1H), 5.23 (q, *J* = 5.2 Hz, 0.33H), 5.16 (q, *J* = 5.0 Hz, 0.69H), 4.14-4.05 (m, 0.68H), 4.02-3.94 (m, 0.34H), 3.35-3.23 (m, 1H), 3.10-2.95 (m, 1H), 2.90-2.60 (m, 2H), 1.61-1.57 (m, 3H).

<sup>13</sup>C{<sup>1</sup>H} NMR (101 MHz, CDCl<sub>3</sub>) δ 150.3, 150.0, 137.9, 137.8, 134.0, 133.9, 133.8, 129.4, 129.1, 128.8, 128.4, 128.3, 128.0, 127.9, 127.4, 127.1, 126.7, 126.6, 126.6, 126.4, 126.0, 124.3, 122.4, 111.7, 111.3, 93.3, 92.9, 75.7, 72.5, 51.0, 49.7, 40.7, 40.2, 37.8, 37.6, 20.9, 20.8.

HRMS (MALDI) *m/z* calcd for C<sub>22</sub>H<sub>20</sub>O<sub>4</sub>NaS ([M+Na]<sup>+</sup>): 403.0975, found 403.0973.

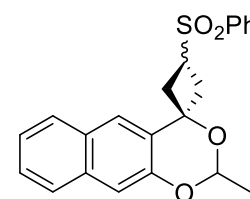

2-ethyl-3'-(phenylsulfonyl)spiro[benzo[*d*][1,3]dioxine-4,1'-cyclobutane] (**2h**, **2h'**) (diastereomixture)

63% (**2h**:**2h'** = 0.89:1), colorless oil.

<sup>1</sup>H NMR (400 MHz, CDCl<sub>3</sub>) δ 7.95-7.92 (m, 2H), 7.70-7.65 (m, 1H), 7.61-7.56 (m, 2H), 7.49-7.47 (m, 0.57H), 7.27-7.23 (m, 2H), 7.09 (dd, *J* = 7.8, 1.8 Hz, 0.45H), 7.0-7.01 (m, 1H), 6.95-6.92 (m, 0.45H), 6.83-6.80 (m, 1H), 4.88 (t, *J* = 5.0 Hz, 0.47H), 4.83 (t, *J* = 5.0 Hz, 0.53H),

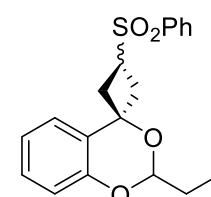

4.06-3.98 (m, 0.52H), 3.87-3.78 (m, 0.43H), 3.16 (dd,  $J = 13.3, 9.2$  Hz, 1H), 3.00-2.97 (m, 0.55H), 2.88-2.83 (m, 0.46H), 2.78-2.66 (m, 1H), 2.62-2.47 (m, 1H), 1.89-1.77 (m, 2H), 1.07-1.01 (m, 3H).

$^{13}\text{C}\{^1\text{H}\}$  NMR (101 MHz, Acetone- $d_6$ )  $\delta$  152.5, 152.2, 138.1, 138.0, 134.0, 134.0, 129.5, 129.1, 129.0, 128.9, 128.5, 128.3, 126.7, 126.4, 126.0, 125.4, 123.4, 121.9, 121.6, 116.9, 116.5, 97.0, 96.5, 75.4, 72.3, 51.1, 49.7, 40.5, 39.5, 37.4, 37.3, 27.52, 27.50, 21.6, 8.0, 7.9.

**HRMS (MALDI)**  $m/z$  calcd for  $\text{C}_{19}\text{H}_{20}\text{O}_4\text{NaS}$  ( $[\text{M}+\text{Na}]^+$ ): 367.0975, found 367.0974.

3'-((4-methoxyphenyl)sulfonyl)-2-methylspiro[benzo[ $d$ ][1,3]dioxine-4,1'-cyclobutane] (**2i**, **2i'**) (diastereomixture) quant. (**2i**:**2i'** = 0.78:1), colorless oil.

$^1\text{H}$  NMR (400 MHz,  $\text{CDCl}_3$ )  $\delta$  7.87-7.82 (m, 2H), 7.48 (dd,  $J = 7.8, 1.4$  Hz, 0.58H), 7.21-7.14 (m, 1H), 7.09 (dd,  $J = 7.8, 1.4$  Hz, 0.40H), 7.04-7.01 (m, 3H), 6.96-6.91 (m, 0.38H), 6.81-6.76 (m, 1H), 5.11 (q,  $J = 5.2$  Hz, 0.46H), 5.06 (q,  $J = 5.2$  Hz, 0.59H), 4.03-3.95 (m, 0.53H), 3.88 (s, 3H), 3.82-3.74 (m, 0.41H), 3.16-3.10 (m, 1H), 2.96 (dd,  $J = 13.1, 8.9$  Hz, 0.62H), 2.86 (dd,  $J = 12.4, 8.7$  Hz, 0.40H), 2.76-2.64 (m, 0.88H), 2.61-2.47 (m, 1.2H), 1.54-1.51 (m, 3H).

$^{13}\text{C}\{^1\text{H}\}$  NMR (101 MHz, Acetone- $d_6$ )  $\delta$  163.9, 163.9, 152.2, 151.9, 130.5, 130.4, 129.4, 129.3, 128.9, 128.8, 126.5, 126.4, 125.7, 123.3, 121.8, 121.6, 116.7, 116.2, 114.6, 93.1, 92.7, 75.2, 72.1, 55.7, 51.1, 49.8, 40.4, 39.6, 37.3, 37.1, 20.71, 20.65.

**HRMS (MALDI)**  $m/z$  calcd for  $\text{C}_{19}\text{H}_{20}\text{O}_5\text{NaS}$  ( $[\text{M}+\text{Na}]^+$ ): 383.0924, found 383.0921.

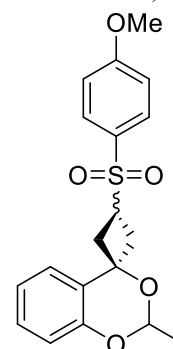

2-methyl-3'-tosylspiro[benzo[ $d$ ][1,3]dioxine-4,1'-cyclobutane] (**2j**, **2j'**) (diastereomixture)

72% yield (**2j**:**2j'** = 0.87:1), colorless oil.

$^1\text{H}$  NMR (400 MHz,  $\text{CDCl}_3$ )  $\delta$  7.82-7.79 (m, 2H), 7.49 (dd,  $J = 7.8, 1.4$  Hz, 0.52H), 7.37 (dd,  $J = 8.2, 2.7$  Hz, 2H), 7.21-7.14 (m, 1H), 7.09 (dd,  $J = 8.0, 1.6$  Hz, 0.40H), 7.06-7.02 (m, 0.58H), 6.96-6.92 (m, 0.42H), 6.82-6.79 (m, 1H), 5.11 (q,  $J = 5.0$  Hz, 0.41H), 5.06 (q,  $J = 5.0$  Hz, 0.52H), 4.05-3.96 (m, 0.59H), 3.83-3.74 (m, 0.40H), 3.18-3.12 (m, 1H), 3.00-2.95 (m, 0.60H), 2.91-2.86 (m, 0.44H), 2.76-2.65 (m, 1H), 2.61-2.48 (m, 1H), 2.46 (s, 3H), 1.54 (d,  $J = 5.0$  Hz, 1.2H), 1.52 (d,  $J = 5.0$  Hz, 1.6H).

$^{13}\text{C}\{^1\text{H}\}$  NMR (101 MHz,  $\text{CDCl}_3$ )  $\delta$  152.2, 151.9, 144.9, 144.9, 135.0, 134.9, 130.0, 128.9, 128.8, 128.4, 128.2, 126.4, 126.4, 125.7, 123.3, 121.9, 121.6, 116.7, 116.3, 93.1, 92.7, 75.2, 72.1, 51.0, 49.6, 40.4, 39.5, 37.3, 37.1, 21.6, 20.71, 20.65.

**HRMS (MALDI)**  $m/z$  calcd for  $\text{C}_{19}\text{H}_{20}\text{O}_4\text{NaS}$  ( $[\text{M}+\text{Na}]^+$ ): 367.0975, found 367.0975.

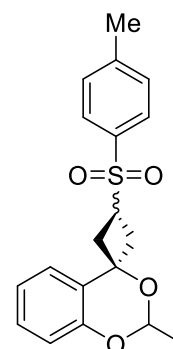

A heteroannulation was performed using **3b** following the procedure for **2**, giving **4b** in 65% yield as a *E/Z* mixture (1/0.9). The compound data of major *E* isomer was shown below.

(*E*)-3'-benzylidene-3-(phenylsulfonyl)-3'H-spiro[cyclobutane-1,1'-isobenzofuran] (*E*)-**4b**)

34% yield, brown oil. (major product)

$^1\text{H}$  NMR (301 MHz, Acetone- $d_6$ )  $\delta$  8.03-7.99 (m, 2H), 7.83-7.65 (m, 7H), 7.45-7.41 (m, 2H), 7.37-7.33 (m, 2H), 7.19-7.14 (m, 1H), 6.10 (s, 1H), 4.37-4.29 (m, 1H), 3.31-3.25 (m, 2H), 2.77-2.73 (m,

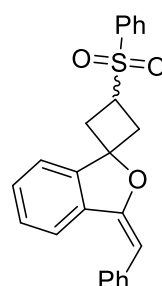



2H).

$^{13}\text{C}\{^1\text{H}\}$  NMR (101 MHz, Acetone- $d_6$ )  $\delta$  153.8, 143.9, 138.6, 136.3, 134.0, 133.8, 129.7, 129.6, 129.0, 128.5, 128.3, 128.2, 125.6, 120.6, 119.7, 96.8, 83.9, 47.5, 38.3.

HRMS (MALDI)  $m/z$  calcd for  $\text{C}_{24}\text{H}_{20}\text{O}_3\text{NaS}$  ( $[\text{M}+\text{Na}]^+$ ): 411.1025, found 411.1027.

#### 4-3. Preparation of BCB units

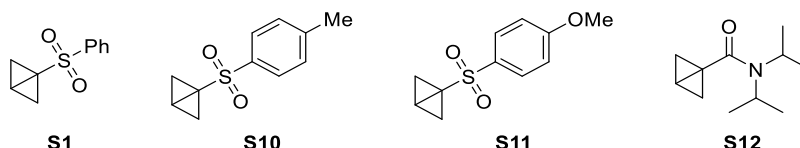

Compounds **S1**, **S10**, **S11** were prepared according to the literature procedure.<sup>3</sup>

Compound **S12** was prepared according to the literature procedure.<sup>1</sup>

#### 4-4. Preparation of Ar units

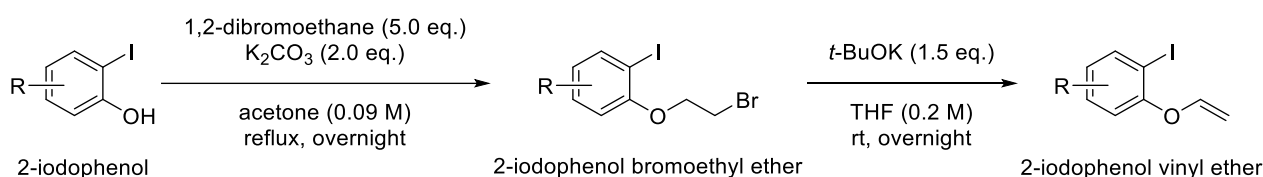

To a solution of 2-iodophenol derivative (1.0 eq.) and 1,2-dibromoethane (5.0 eq.) in acetone (0.09 M) was added  $\text{K}_2\text{CO}_3$  (2.0 eq.). The resulting mixture was stirred under reflux conditions for overnight. The reaction was quenched with water and extracted with  $\text{CH}_2\text{Cl}_2$ . The organic layer was washed with brine, dried over  $\text{Na}_2\text{SO}_4$ , and concentrated. The crude product was purified by a silica gel column chromatography (hexane/EtOAc = 20:1) to give 2-iodophenol bromoethyl ether derivative as a colorless oil or color solid.

To a solution of 2-iodophenol bromoethyl ether derivative (1.0 eq.) in THF (0.20 M) was added *t*-BuOK (1.5 eq.) portionwise. The resulting mixture was stirred at room temperature for overnight. The reaction mixture was filtered and washed with  $\text{CH}_2\text{Cl}_2$ . The combined filtrate was concentrated, and the residue was purified by a silica gel column chromatography (hexane/EtOAc = 25:1) to give 2-iodophenol vinyl ether derivative (2 step yields) as oil or solid.

#### 2-iodo-4-methoxy-1-(vinyl)oxybenzene (**S13**)

62% yield, colorless oil.

$^1\text{H}$  NMR (400 MHz,  $\text{CDCl}_3$ )  $\delta$  7.33 (d,  $J$  = 2.7 Hz, 1H), 6.93 (d,  $J$  = 9.0 Hz, 1H), 6.86 (dd,  $J$  = 9.0, 2.7 Hz, 1H), 6.53 (dd,  $J$  = 14.0, 6.2 Hz, 1H), 4.58 (dd,  $J$  = 14.0, 2.1 Hz, 1H), 4.39 (dd,  $J$  = 6.2, 2.1 Hz, 1H), 3.77 (s, 3H).

$^{13}\text{C}\{^1\text{H}\}$  NMR (101 MHz,  $\text{CDCl}_3$ )  $\delta$  156.3, 149.6, 149.4, 124.2, 119.0, 115.2, 93.9, 88.2, 55.8.

HRMS (MALDI)  $m/z$  calcd for  $\text{C}_9\text{H}_9\text{O}_2\text{I}$  ( $[\text{M}]^+$ ): 275.9642, found 275.9641.

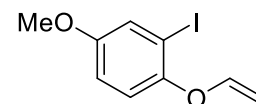

---

**1-chloro-3-iodo-2-(vinylloxy)benzene (S14)**

58% yield, colorless oil.

<sup>1</sup>H NMR (400 MHz, CDCl<sub>3</sub>) δ 7.73 (dd, *J* = 8.0, 1.6 Hz, 1H), 7.41 (dd, *J* = 8.2, 1.4 Hz, 1H), 6.88 (t, *J* = 8.0 Hz, 1H), 6.56 (dd, *J* = 14.0, 6.3 Hz, 1H), 4.35 (dd, *J* = 6.3, 2.7 Hz, 1H), 4.24 (dd, *J* = 14.2, 2.7 Hz, 1H).

<sup>13</sup>C{<sup>1</sup>H} NMR (101 MHz, CDCl<sub>3</sub>) δ 150.9, 148.7, 138.1, 130.9, 127.9, 127.5, 92.1, 91.6.

HRMS (MALDI) *m/z* calcd for C<sub>8</sub>H<sub>7</sub>OClI ([M+H]<sup>+</sup>): 280.9225, found 280.9231.

---

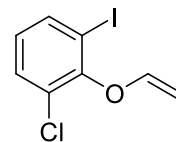**2-iodo-3-(vinylloxy)naphthalene (S15)**

65% yield, pale yellow oil.

<sup>1</sup>H NMR (500 MHz, CDCl<sub>3</sub>) δ 8.36 (s, 1H), 7.71 (t, *J* = 8.9 Hz, 2H), 7.48 (t, *J* = 7.4 Hz, 1H), 7.41 (t, *J* = 8.0 Hz, 1H), 7.30 (s, 1H), 6.71 (dd, *J* = 13.6, 5.8 Hz, 1H), 4.93 (dd, *J* = 13.6, 1.9 Hz, 1H), 4.62 (dd, *J* = 5.8, 1.9 Hz, 1H).

<sup>13</sup>C{<sup>1</sup>H} NMR (126 MHz, CDCl<sub>3</sub>) δ 152.9, 147.9, 139.6, 134.0, 131.7, 127.2, 127.0, 126.7, 125.4, 112.0, 97.0, 87.8.

HRMS (MALDI) *m/z* calcd for C<sub>12</sub>H<sub>10</sub>OI ([M+H]<sup>+</sup>): 296.9771, found 296.9764.

---

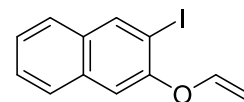**2-iodo-3-(vinylloxy)pyridine (S16)**

46% yield, brown oil.

<sup>1</sup>H NMR (301 MHz, Acetone-*d*<sub>6</sub>) δ 8.12 (dd, *J* = 4.3, 1.9 Hz, 1H), 7.45-7.37 (m, 2H), 6.81 (dd, *J* = 13.7, 6.0 Hz, 1H), 4.83 (dd, *J* = 13.7, 2.0 Hz, 1H), 4.64 (dd, *J* = 6.0, 2.0 Hz, 1H).

<sup>13</sup>C{<sup>1</sup>H} NMR (101 MHz, Acetone-*d*<sub>6</sub>) δ 153.1, 147.6, 145.4, 124.2, 123.2, 111.9, 96.7.

HRMS (MALDI) *m/z* calcd for C<sub>7</sub>H<sub>7</sub>NOI ([M+H]<sup>+</sup>): 247.9567, found 247.9563.

---

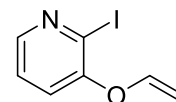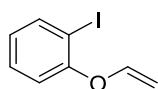**S2**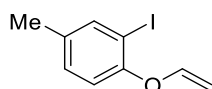**S17**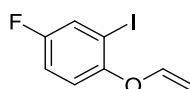**S18**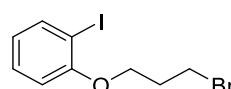**S19**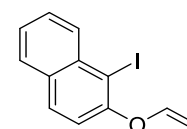**S20**

The compounds **S2**, **S17**, **S18** were prepared according to the literature procedure.<sup>1</sup>

The compound **S19** was prepared according to the literature procedure.<sup>4</sup>

The compound **S20** was prepared according to the literature procedure.<sup>5</sup>

## 5. References

1. R. E. McNamee, A. L. Thompson, E. A. Anderson, *J. Am. Chem. Soc.* **2021**, *143*, 21246-21251.
2. R. V. Rozhkov, R. C. Larock, *J. Org. Chem.* **2010**, *75*, 4131-4134.
3. M. Jung, V. N. G. Lindsay, *J. Am. Chem. Soc.* **2022**, *144*, 4764-4769.
4. A. Martins, U. Marquardt, N. Kasravi, D. Alberico, M. Lautens, *J. Org. Chem.* **2006**, *71*, 4937-4942.
5. N. Sakiyama, K. Noguchi, K. Tanaka, *Angew. Chem. Int. Ed.* **2012**, *51*, 5976-5980.

## 6. X-ray Crystallographic Analysis

(3*r*,4*r*)-2-methyl-3'-(phenylsulfonyl)spiro[benzo[d][1,3]dioxine-4,1'-cyclobutane] (**2a**)

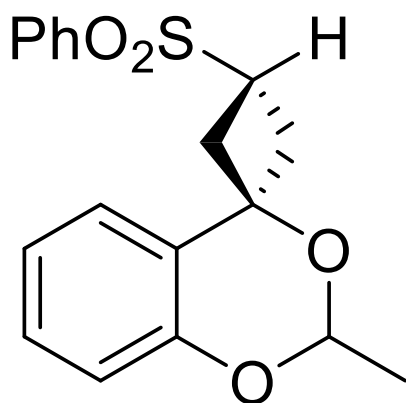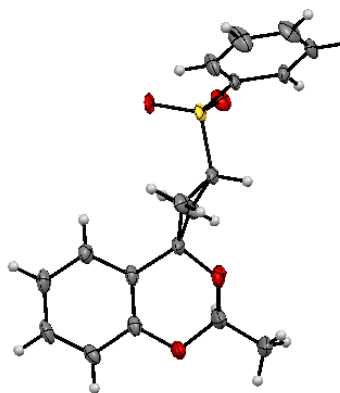

CCDC number 2247662

---

|                 |                |                    |              |
|-----------------|----------------|--------------------|--------------|
| Bond precision: | C-C = 0.0039 Å | Wavelength=0.71075 |              |
| Cell:           | a=11.154 (2)   | b=8.1794 (13)      | c=17.502 (3) |
|                 | alpha=90       | beta=96.951 (4)    | gamma=90     |
| Temperature:    | 273 K          |                    |              |

|                        | Calculated   | Reported     |
|------------------------|--------------|--------------|
| Volume                 | 1585.0 (5)   | 1585.1 (5)   |
| Space group            | P 21/n       | P 1 21/n 1   |
| Hall group             | -P 2yn       | -P 2yn       |
| Moiety formula         | C18 H18 O4 S | C18 H18 O4 S |
| Sum formula            | C18 H18 O4 S | C18 H18 O4 S |
| Mr                     | 330.38       | 330.40       |
| Dx, g cm <sup>-3</sup> | 1.385        | 1.384        |
| Z                      | 4            | 4            |
| Mu (mm <sup>-1</sup> ) | 0.222        | 0.222        |
| F000                   | 696.0        | 696.0        |
| F000'                  | 696.83       |              |
| h, k, lmax             | 14, 10, 22   | 14, 10, 22   |
| Nref                   | 3645         | 3639         |
| Tmin, Tmax             | 0.961, 0.978 | 0.344, 0.978 |
| Tmin'                  | 0.875        |              |

Correction method= # Reported T Limits: Tmin=0.344 Tmax=0.978  
AbsCorr = MULTI-SCAN

Data completeness= 0.998

Theta(max)= 27.514

R(reflections)= 0.0695 ( 2734)

wR2(reflections)=  
0.1891 ( 3639)

S = 1.018

Npar= 218

---

The following ALERTS were generated. Each ALERT has the format

**test-name\_ALERT\_alert-type\_alert-level.**

Click on the hyperlinks for more details of the test.

---

● **Alert level C**

DIFMX02\_ALERT\_1\_C The maximum difference density is > 0.1\*ZMAX\*0.75

The relevant atom site should be identified.

|                   |                                                  |       |        |
|-------------------|--------------------------------------------------|-------|--------|
| PLAT097_ALERT_2_C | Large Reported Max. (Positive) Residual Density  | 1.40  | eA-3   |
| PLAT213_ALERT_2_C | Atom O4 has ADP max/min Ratio .....              | 3.4   | prolat |
| PLAT250_ALERT_2_C | Large U3/U1 Ratio for Average U(i,j) Tensor .... | 2.7   | Note   |
| PLAT906_ALERT_3_C | Large K Value in the Analysis of Variance .....  | 2.689 | Check  |
| PLAT975_ALERT_2_C | Check Calcd Resid. Dens. 0.91Ang From O3 .       | 0.55  | eA-3   |
| PLAT975_ALERT_2_C | Check Calcd Resid. Dens. 0.97Ang From O1 .       | 0.49  | eA-3   |
| PLAT977_ALERT_2_C | Check Negative Difference Density on H1A .       | -0.31 | eA-3   |
| PLAT977_ALERT_2_C | Check Negative Difference Density on H1B .       | -0.36 | eA-3   |
| PLAT977_ALERT_2_C | Check Negative Difference Density on H1C .       | -0.51 | eA-3   |

---

● **Alert level G**

CHEMS02\_ALERT\_1\_G Please check that you have entered the correct  
\_publ\_requested\_category classification of your compound;  
FI or CI or EI for inorganic; FM or CM or EM for metal-organic;  
FO or CO or EO for organic.

From the CIF: \_publ\_requested\_category CHOOSE FI FM FO CI CM CO or A

From the CIF: \_chemical\_formula\_sum :C18 H18 O4 S1

|                   |                                                  |      |        |
|-------------------|--------------------------------------------------|------|--------|
| PLAT002_ALERT_2_G | Number of Distance or Angle Restraints on AtSite | 4    | Note   |
| PLAT003_ALERT_2_G | Number of Uiso or Uij Restrained non-H Atoms ... | 2    | Report |
| PLAT072_ALERT_2_G | SHELXL First Parameter in WGHT Unusually Large   | 0.13 | Report |
| PLAT172_ALERT_4_G | The CIF-Embedded .res File Contains DFIX Records | 1    | Report |
| PLAT178_ALERT_4_G | The CIF-Embedded .res File Contains SIMU Records | 1    | Report |
| PLAT199_ALERT_1_G | Reported _cell_measurement_temperature .....     | 273  | Check  |
| PLAT200_ALERT_1_G | Reported _diffrn_ambient_temperature .....       | 273  | Check  |
| PLAT230_ALERT_2_G | Hirshfeld Test Diff for O2A --C2 .               | 6.0  | s.u.   |
| PLAT301_ALERT_3_G | Main Residue Disorder .....                      | 4%   | Note   |
| PLAT793_ALERT_4_G | Model has Chirality at C2 (Centro SPGR)          | R    | Verify |
| PLAT860_ALERT_3_G | Number of Least-Squares Restraints .....         | 10   | Note   |
| PLAT910_ALERT_3_G | Missing # of FCF Reflection(s) Below Theta(Min). | 4    | Note   |
| PLAT912_ALERT_4_G | Missing # of FCF Reflections Above STh/L= 0.600  | 2    | Note   |
| PLAT941_ALERT_3_G | Average HKL Measurement Multiplicity .....       | 4.2  | Low    |
| PLAT978_ALERT_2_G | Number C-C Bonds with Positive Residual Density. | 3    | Info   |

---

0 **ALERT level A** = Most likely a serious problem - resolve or explain  
0 **ALERT level B** = A potentially serious problem, consider carefully  
10 **ALERT level C** = Check. Ensure it is not caused by an omission or oversight  
16 **ALERT level G** = General information/check it is not something unexpected

4 ALERT type 1 CIF construction/syntax error, inconsistent or missing data  
13 ALERT type 2 Indicator that the structure model may be wrong or deficient  
5 ALERT type 3 Indicator that the structure quality may be low  
4 ALERT type 4 Improvement, methodology, query or suggestion  
0 ALERT type 5 Informative message, check

---

(3's,4s)-2-methyl-3'-(phenylsulfonyl)spiro[benzo[d][1,3]dioxine-4,1'-cyclobutane] (**2a'**)

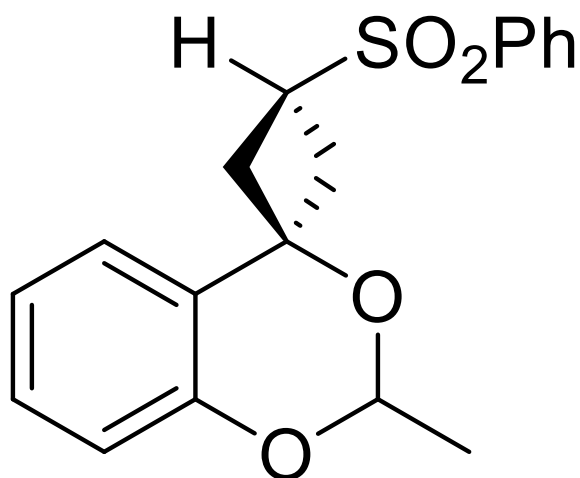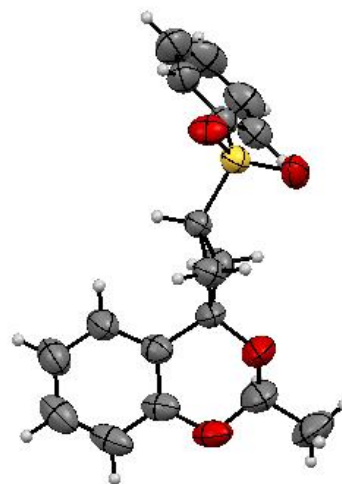

CCDC number 2247661

Bond precision: C-C = 0.0055 Å      Wavelength=1.54187  
 Cell:            a=8.3144 (3)      b=9.8167 (4)      c=20.8013 (7)  
                   alpha=90      beta=99.087 (7)      gamma=90  
 Temperature:    296 K

|                        | Calculated   | Reported     |
|------------------------|--------------|--------------|
| Volume                 | 1676.49 (11) | 1676.48 (11) |
| Space group            | P 21/c       | P 1 21/c 1   |
| Hall group             | -P 2ybc      | -P 2ybc      |
| Moiety formula         | C18 H18 O4 S | C18 H18 O4 S |
| Sum formula            | C18 H18 O4 S | C18 H18 O4 S |
| Mr                     | 330.38       | 330.40       |
| Dx, g cm <sup>-3</sup> | 1.309        | 1.309        |
| Z                      | 4            | 4            |
| Mu (mm <sup>-1</sup> ) | 1.865        | 1.866        |
| F000                   | 696.0        | 696.0        |
| F000'                  | 699.36       |              |
| h, k, lmax             | 10, 11, 25   | 9, 11, 24    |
| Nref                   | 3067         | 3027         |
| Tmin, Tmax             | 0.671, 0.756 | 0.513, 0.756 |
| Tmin'                  | 0.411        |              |

Correction method= # Reported T Limits: Tmin=0.513 Tmax=0.756  
 AbsCorr = MULTI-SCAN

Data completeness= 0.987      Theta(max)= 68.194

R(reflections)= 0.0569 ( 2023)      wR2(reflections)=  
 S = 1.026      Npar= 208      0.1610 ( 3027)

---

The following ALERTS were generated. Each ALERT has the format

**test-name\_ALERT\_alert-type\_alert-level.**

Click on the hyperlinks for more details of the test.

---

● **Alert level C**

PLAT241\_ALERT\_2\_C High 'MainMol' Ueq as Compared to Neighbors of O4 Check  
PLAT340\_ALERT\_3\_C Low Bond Precision on C-C Bonds ..... 0.0055 Ang.

---

● **Alert level G**

CHEMS02\_ALERT\_1\_G Please check that you have entered the correct  
\_publ\_requested\_category classification of your compound;  
FI or CI or EI for inorganic; FM or CM or EM for metal-organic;  
FO or CO or EO for organic.  
From the CIF: \_publ\_requested\_category CHOOSE FI FM FO CI CM CO or A  
From the CIF: \_chemical\_formula\_sum :C18 H18 O4 S1  
PLAT793\_ALERT\_4\_G Model has Chirality at C18 (Centro SPGR) R Verify  
PLAT882\_ALERT\_1\_G No Datum for \_diffrn\_reflns\_av\_unetI/netI ..... Please Do !  
PLAT986\_ALERT\_1\_G No non-zero f' Anomalous Scattering Values Found Please Check

---

- 0 **ALERT level A** = Most likely a serious problem - resolve or explain  
0 **ALERT level B** = A potentially serious problem, consider carefully  
2 **ALERT level C** = Check. Ensure it is not caused by an omission or oversight  
4 **ALERT level G** = General information/check it is not something unexpected
- 3 ALERT type 1 CIF construction/syntax error, inconsistent or missing data  
1 ALERT type 2 Indicator that the structure model may be wrong or deficient  
1 ALERT type 3 Indicator that the structure quality may be low  
1 ALERT type 4 Improvement, methodology, query or suggestion  
0 ALERT type 5 Informative message, check
-

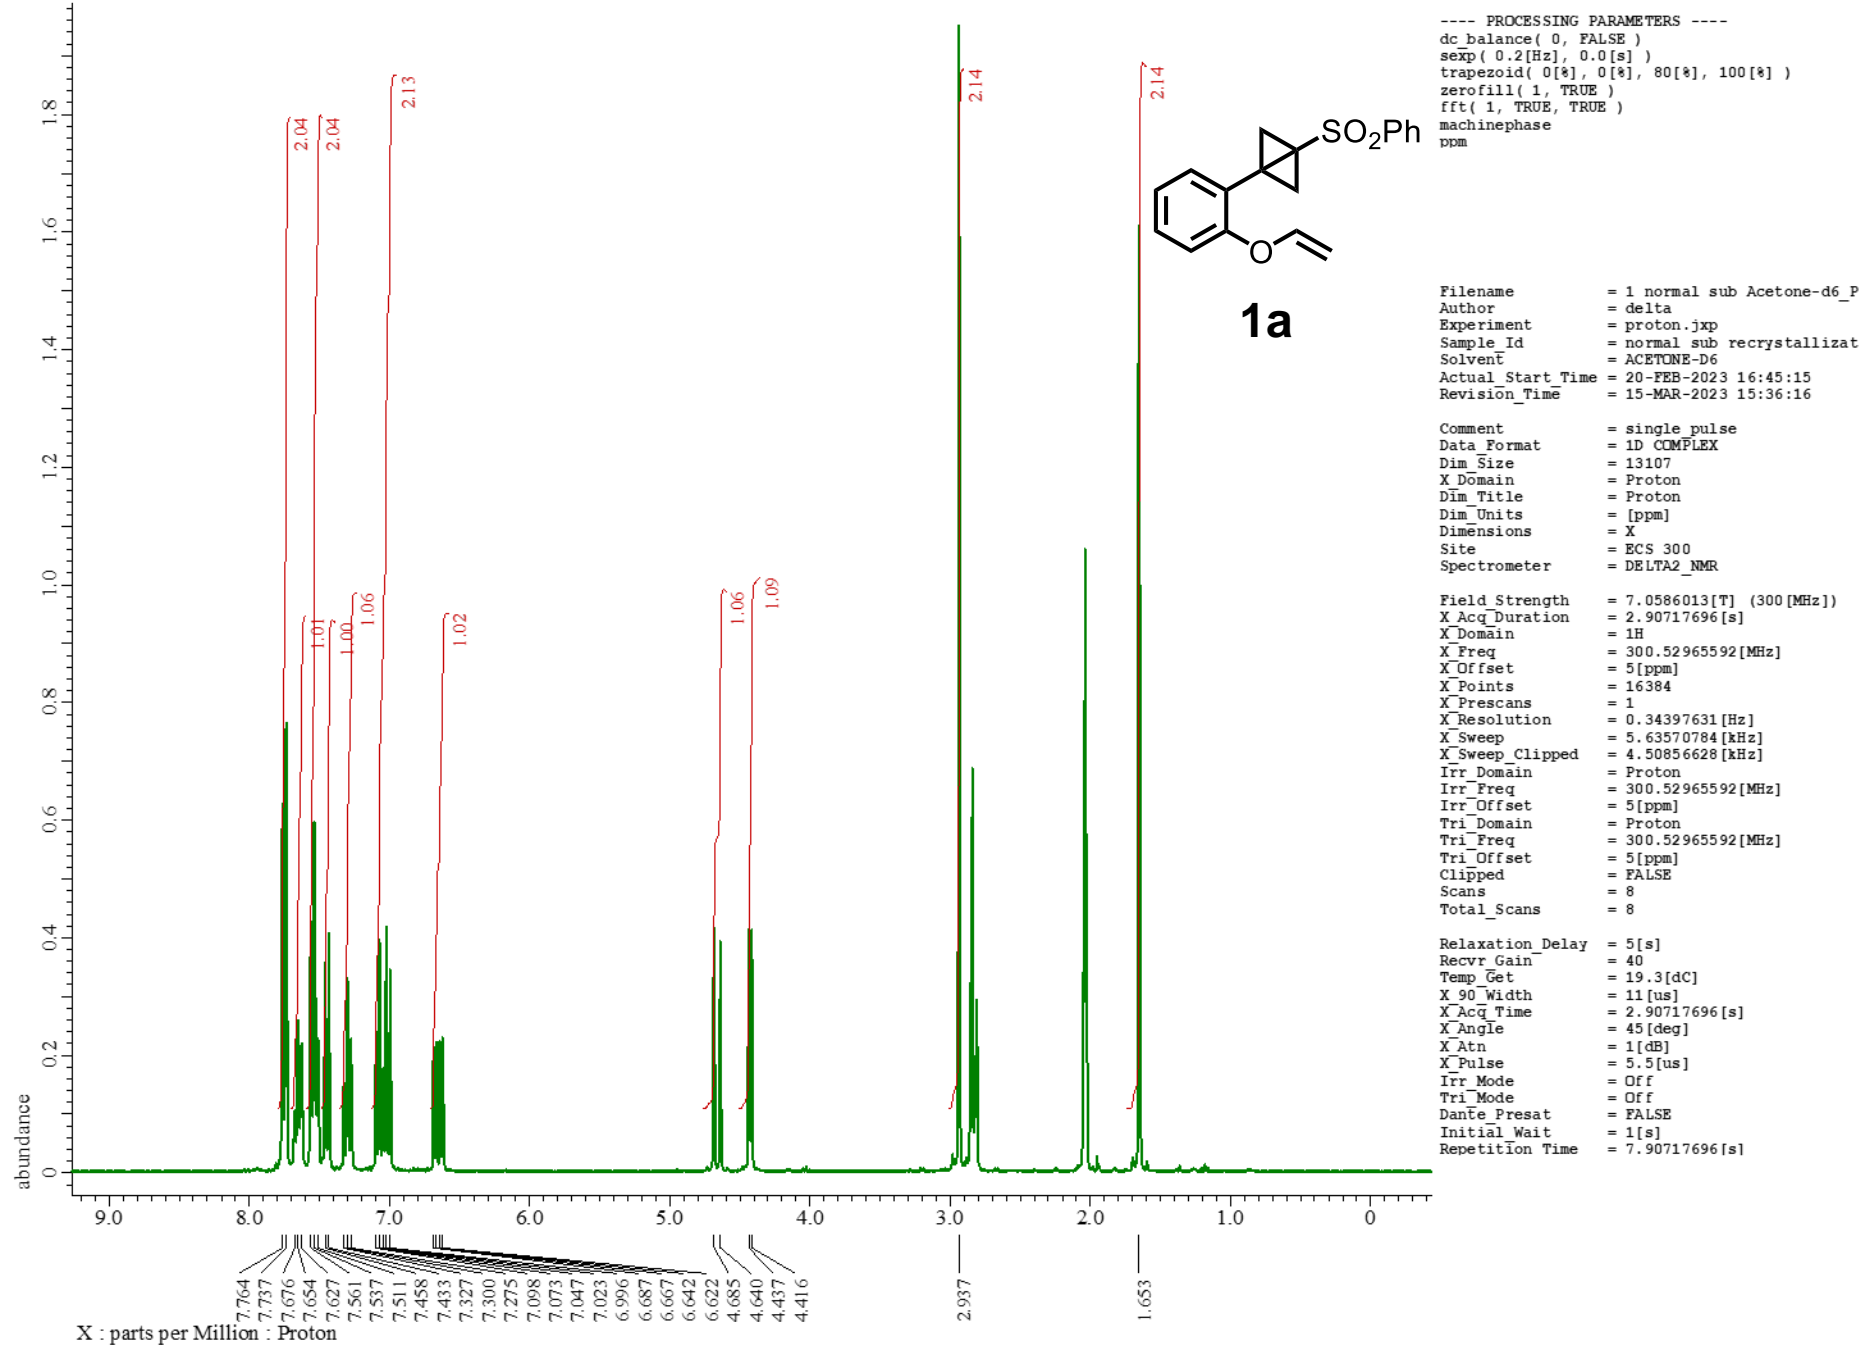

<sup>1</sup>H NMR spectrum of **1a** (301 MHz, Acetone-*d*<sub>6</sub>)



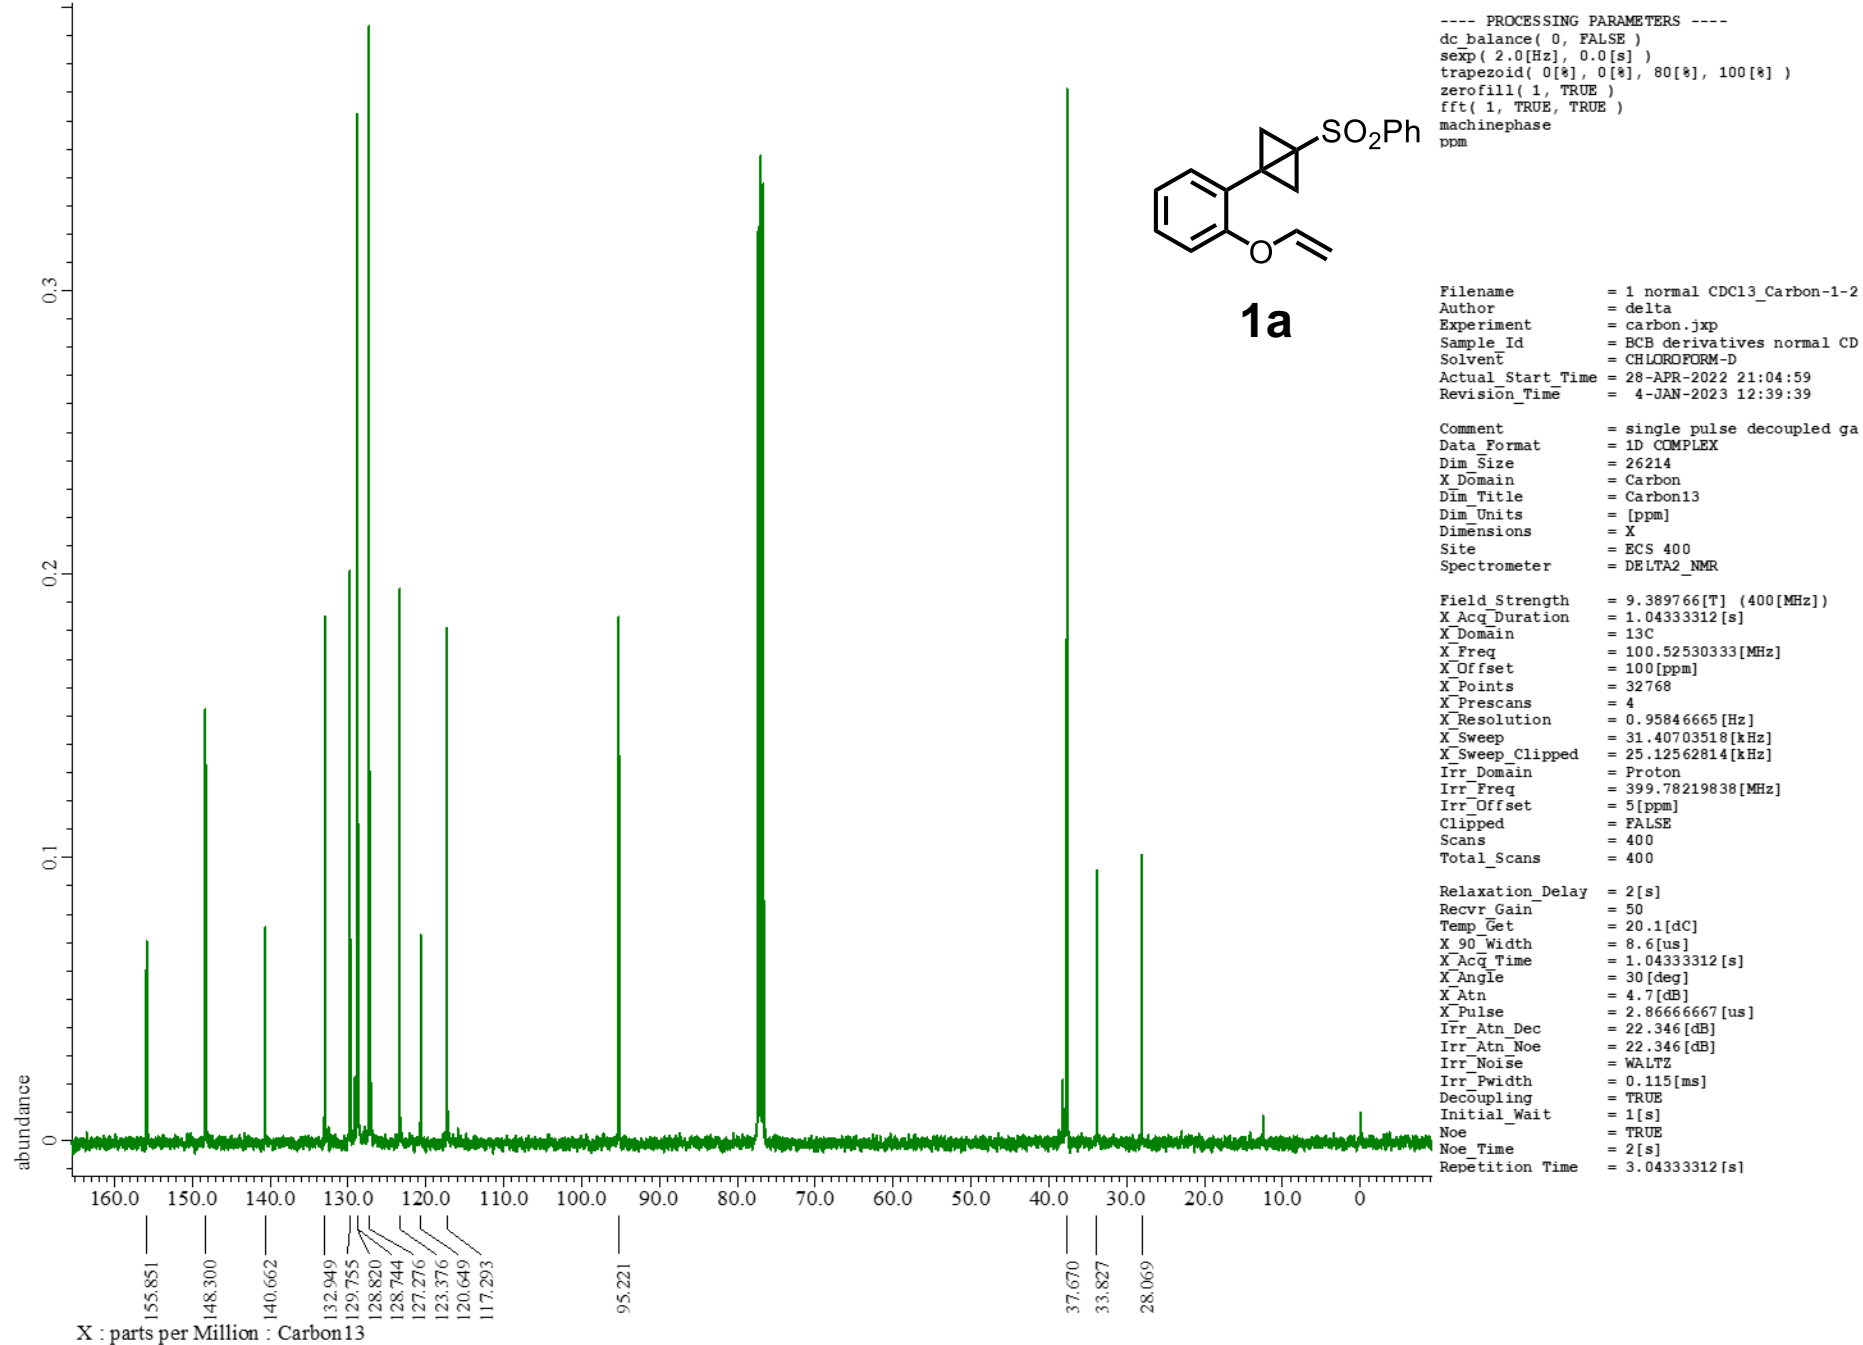

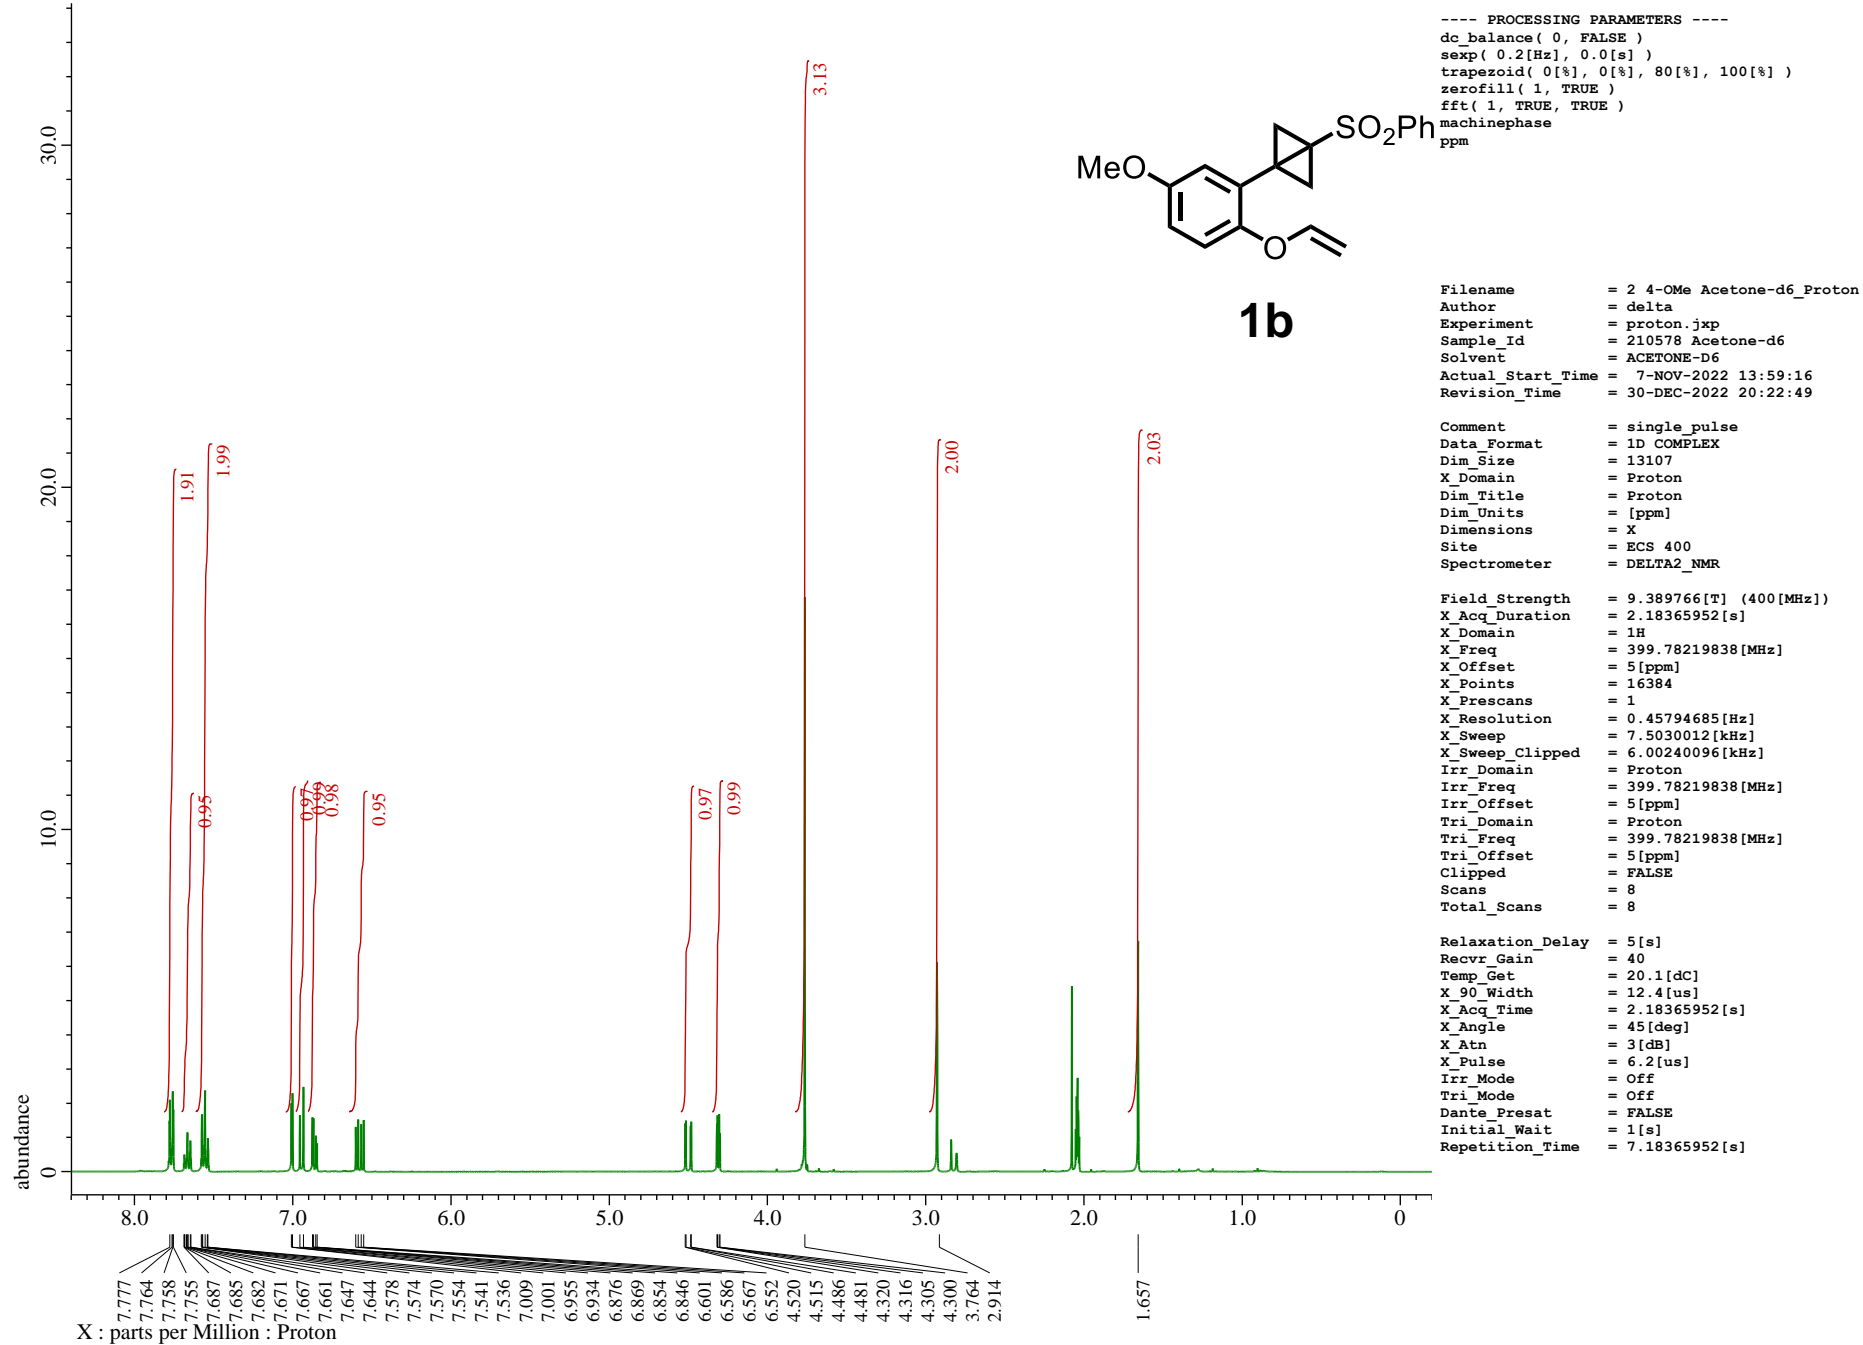

<sup>1</sup>H NMR spectrum of **1b** (400 MHz, Acetone-*d*<sub>6</sub>)

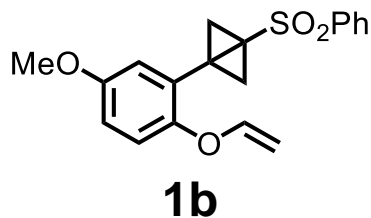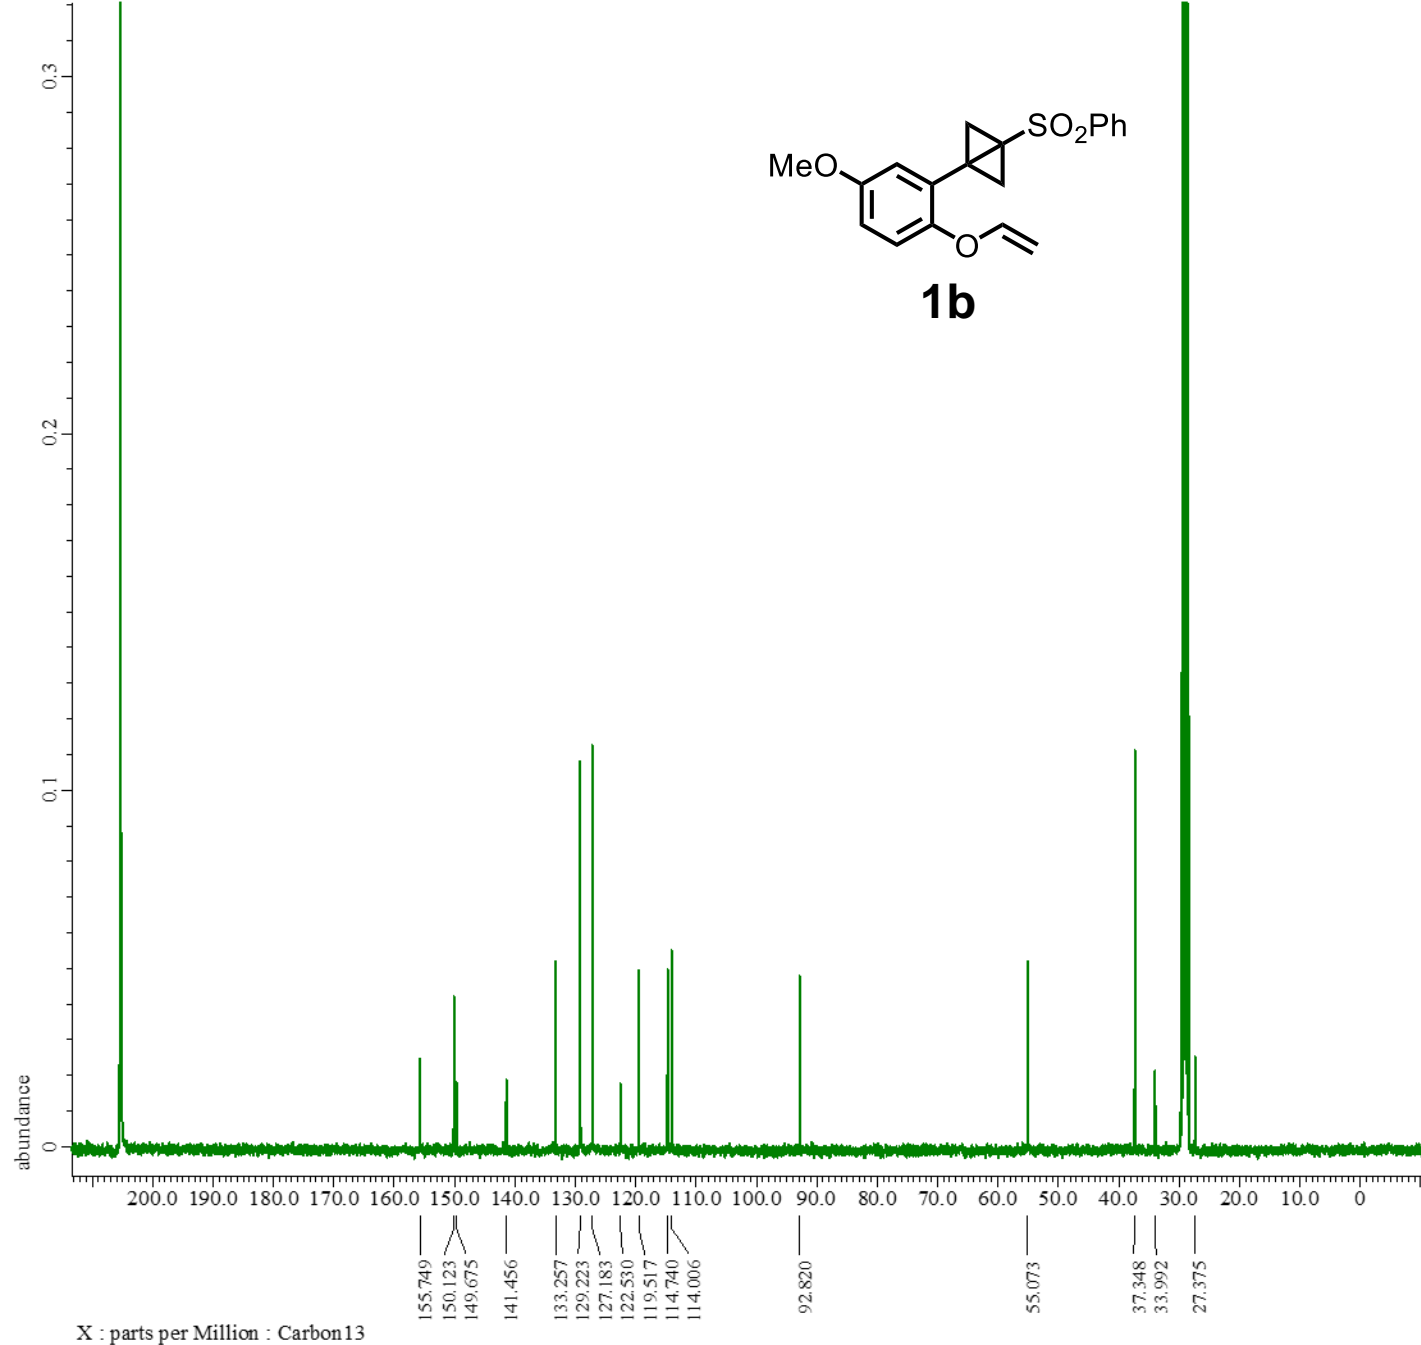

```

---- PROCESSING PARAMETERS ----
dc balance( 0, FALSE )
sexp( 2.0[Hz], 0.0[s] )
trapezoid( 0[8], 0[8], 80[8], 100[8] )
zerofill( 1, TRUE )
fft( 1, TRUE, TRUE )
machinephase
ppm

Filename           = 2 4-OMe Acetone-d6_Carbon
Author             = delta
Experiment         = carbon.jxp
Sample Id          = 210578 Acetone-d6
Solvent            = ACETONE-D6
Actual Start Time  = 7-NOV-2022 15:19:28
Revision Time     = 17-MAR-2023 15:47:40

Comment           = single pulse decoupled ga
Data Format        = 1D COMPLEX
Dim Size          = 26214
X_Domain          = Carbon
Dim Title         = Carbon13
Dim Units         = [ppm]
Dimensions        = X
Site              = ECS 400
Spectrometer      = DELTA2_NMR

Field Strength    = 9.389766[T] (400[MHz])
X_Acq_Duration   = 1.04333312[s]
X_Domain         = 13C
X_Freq           = 100.52530333[MHz]
X_Offset         = 100[ppm]
X_Points         = 32768
X_Prescans       = 4
X_Resolution     = 0.95846665[Hz]
X_Sweep          = 31.40703518[kHz]
X_Sweep_Clipped = 25.12562814[kHz]
Irr_Domain       = Proton
Irr_Freq         = 399.78219838[MHz]
Irr_Offset       = 5[ppm]
Clipped          = FALSE
Scans            = 1024
Total_Scans      = 1024

Relaxation_Delay  = 2[s]
Recvr Gain        = 50
Temp_Get          = 20.3[dC]
X_90_Width       = 9[us]
X_Acq_Time       = 1.04333312[s]
X_Angle          = 30[deg]
X_Atn            = 4.7[dB]
X_Pulse          = 3[us]
Irr_Atn_Dec      = 22.346[dB]
Irr_Atn_Noe     = 22.346[dB]
Irr_Noise        = WALTZ
Irr_Pwidth       = 0.115[ms]
Decoupling        = TRUE
Initial_Wait     = 1[s]
Noe               = TRUE
Noe Time         = 2[s]
Repetition Time  = 3.04333312[s]

```

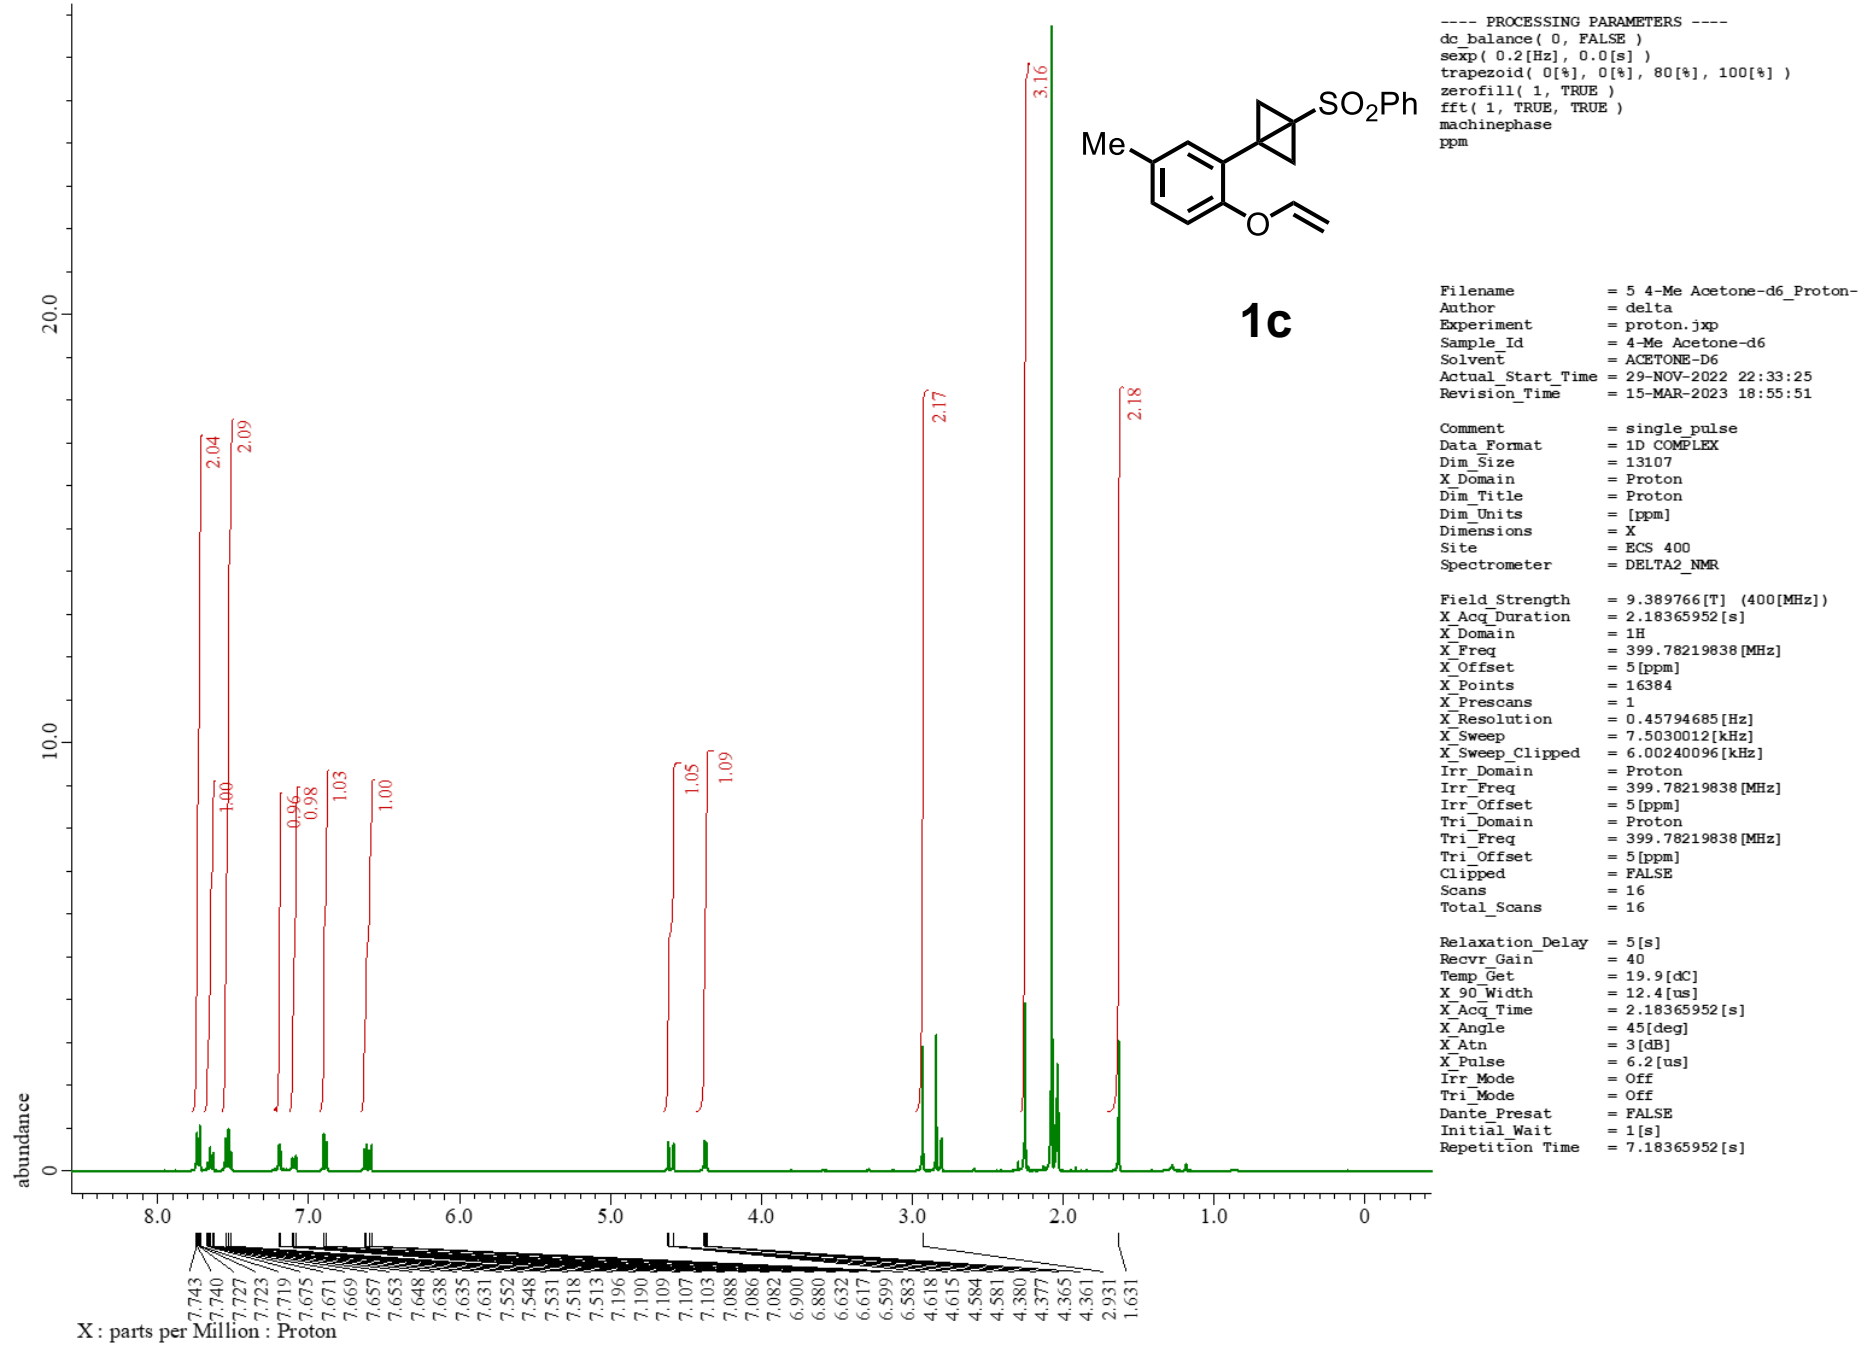

<sup>1</sup>H NMR spectrum of **1c** (400 MHz, Acetone-*d*<sub>6</sub>)

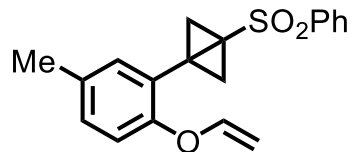

**1c**

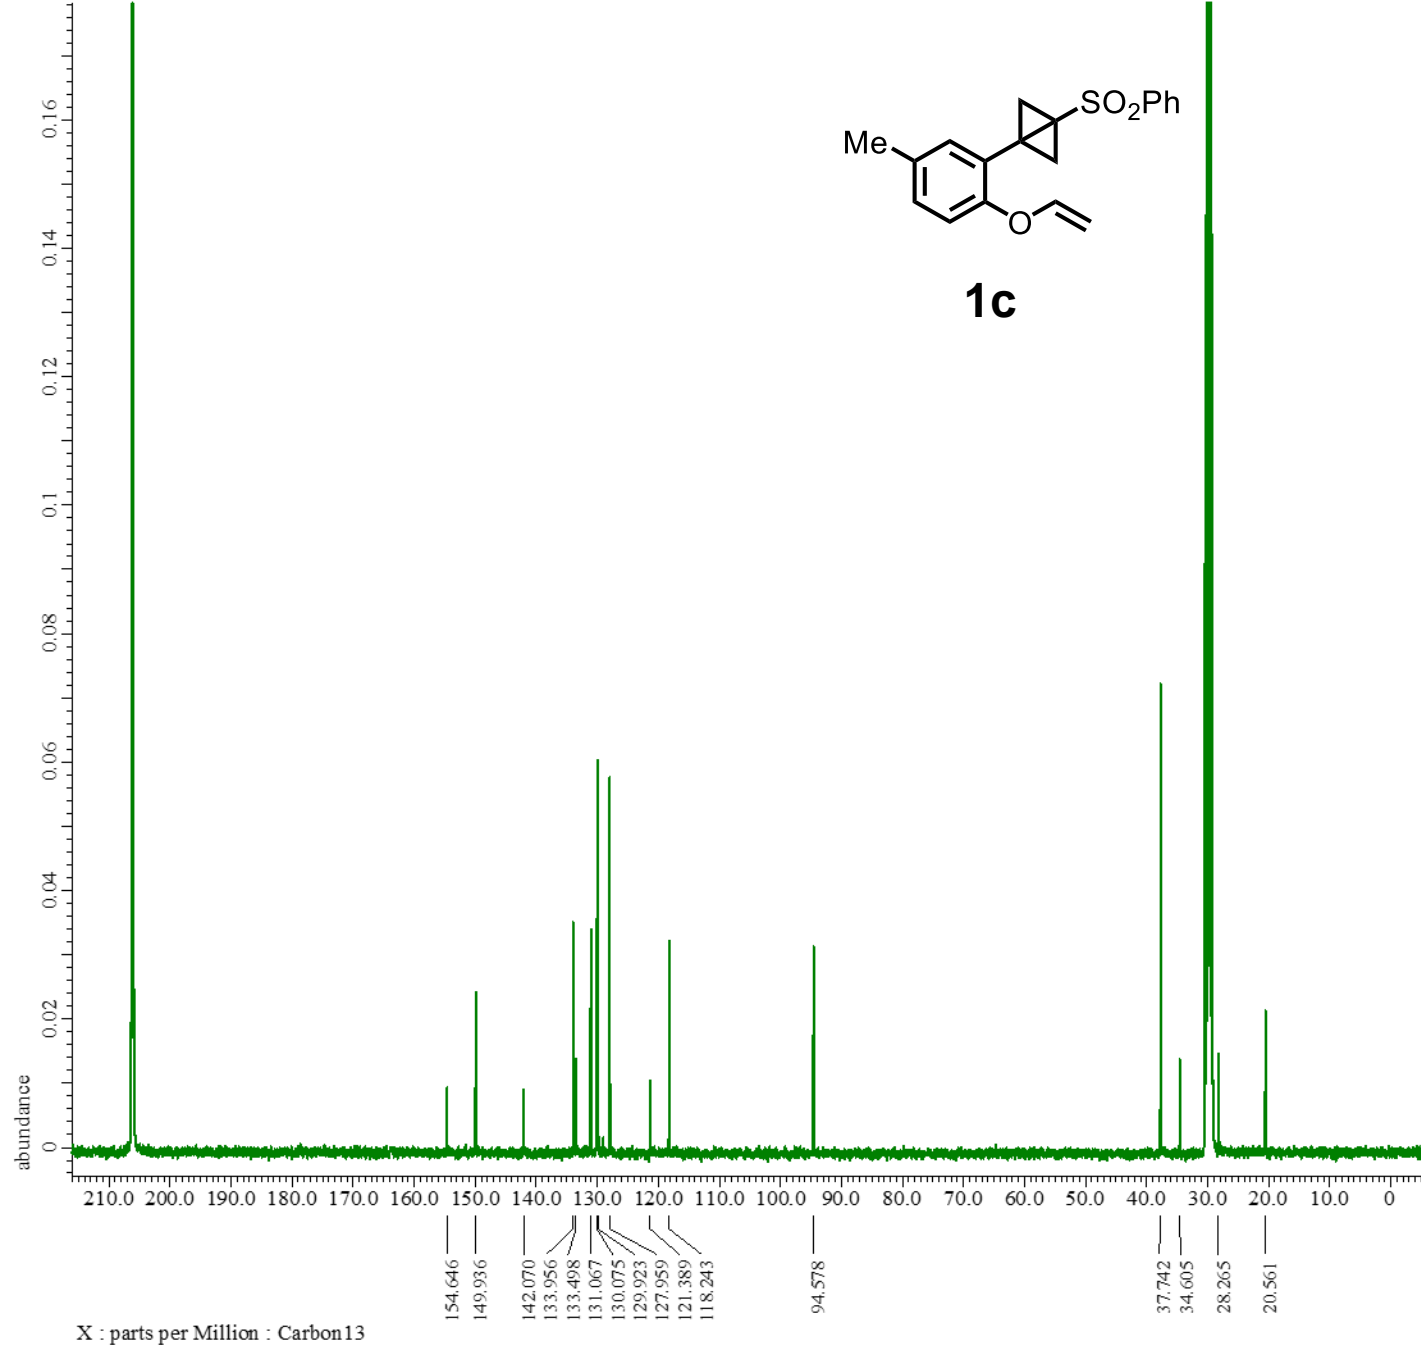

```

---- PROCESSING PARAMETERS ----
dc balance( 0, FALSE )
sexp( 2.0[Hz], 0.0[s] )
trapezoid( 0[8], 0[8], 80[8], 100[8] )
zerofill( 1, TRUE )
fft( 1, TRUE, TRUE )
machinephase
ppm

Filename           = 5 4-Me Acetone-d6_Carbon-
Author             = delta
Experiment         = carbon.jxp
Sample Id          = 4-Me Acetone-d6
Solvent           = ACETONE-D6
Actual Start Time = 2-DEC-2022 03:07:04
Revision Time     = 17-MAR-2023 15:45:54

Comment           = single pulse decoupled ga
Data Format        = 1D COMPLEX
Dim Size          = 26214
X_Domain          = Carbon
Dim Title         = Carbon13
Dim Units         = [ppm]
Dimensions        = X
Site              = ECS 400
Spectrometer      = DELTA2_NMR

Field Strength    = 9.389766[T] (400[MHz])
X_Acq_Duration   = 1.04333312[s]
X_Domain         = 13C
X_Freq           = 100.52530333[MHz]
X_Offset         = 100[ppm]
X_Points         = 32768
X_Prescans       = 4
X_Resolution     = 0.95846665[Hz]
X_Sweep          = 31.40703518[kHz]
X_Sweep_Clipped = 25.12562814[kHz]
Irr_Domain       = Proton
Irr_Freq         = 399.78219838[MHz]
Irr_Offset       = 5[ppm]
Clipped          = FALSE
Scans            = 3450
Total_Scans      = 3450

Relaxation_Delay = 2[s]
Recvr Gain       = 50
Temp_Get         = 20.1[dC]
X_90_Width      = 9[us]
X_Acq_Time       = 1.04333312[s]
X_Angle          = 30[deg]
X_Atn            = 4.7[dB]
X_Pulse         = 3[us]
Irr_Atn_Dec     = 22.346[dB]
Irr_Atn_Noise   = 22.346[dB]
Irr_Noise       = WALTZ
Irr_Pwidth      = 0.115[ms]
Decoupling      = TRUE
Initial_Wait    = 1[s]
Noe              = TRUE
Noe_Time        = 2[s]
Repetition Time = 3.04333312[s]

```

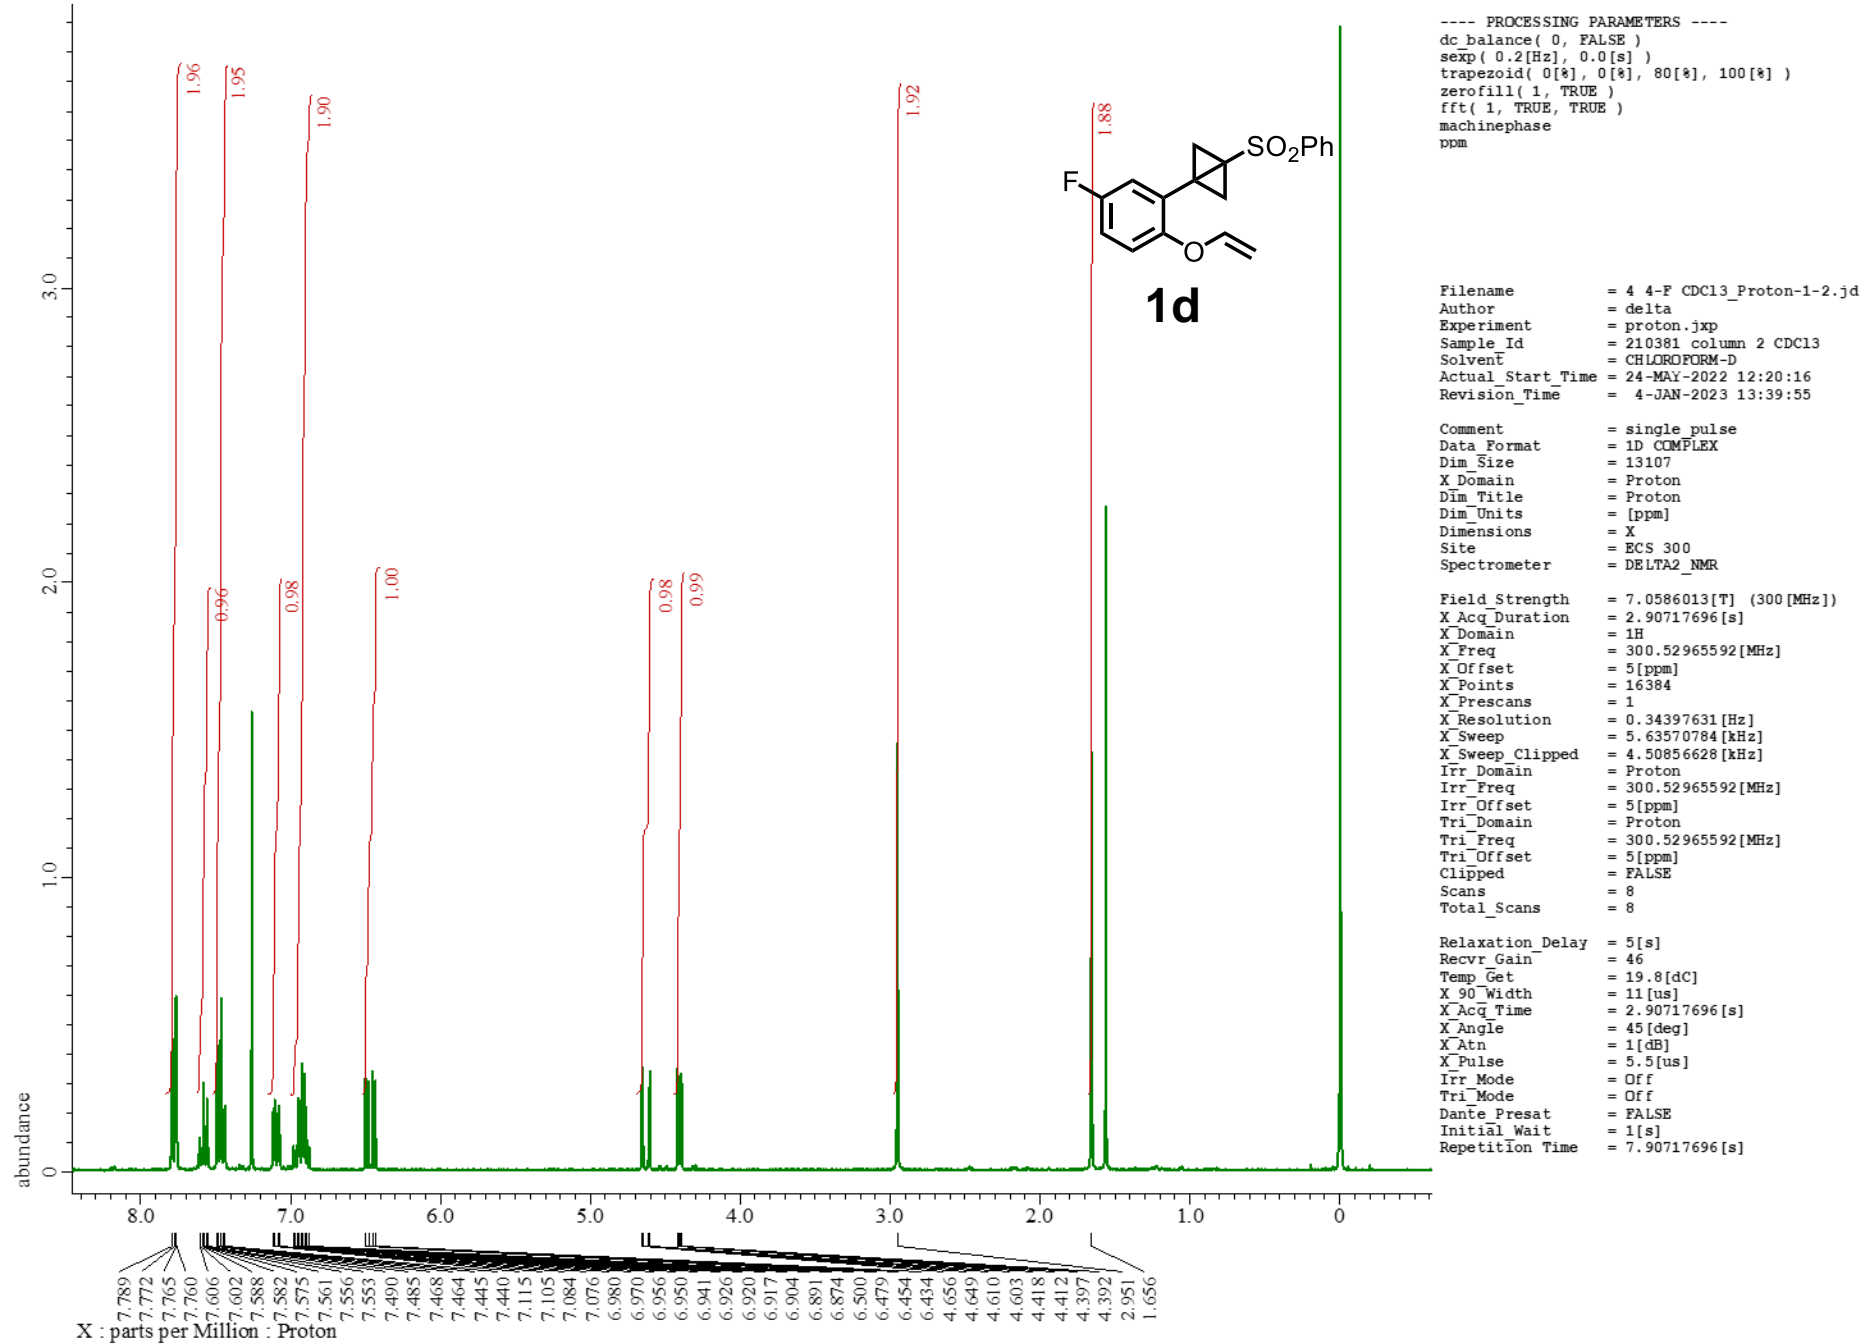

<sup>1</sup>H NMR spectrum of **1d** (301 MHz, CDCl<sub>3</sub>)

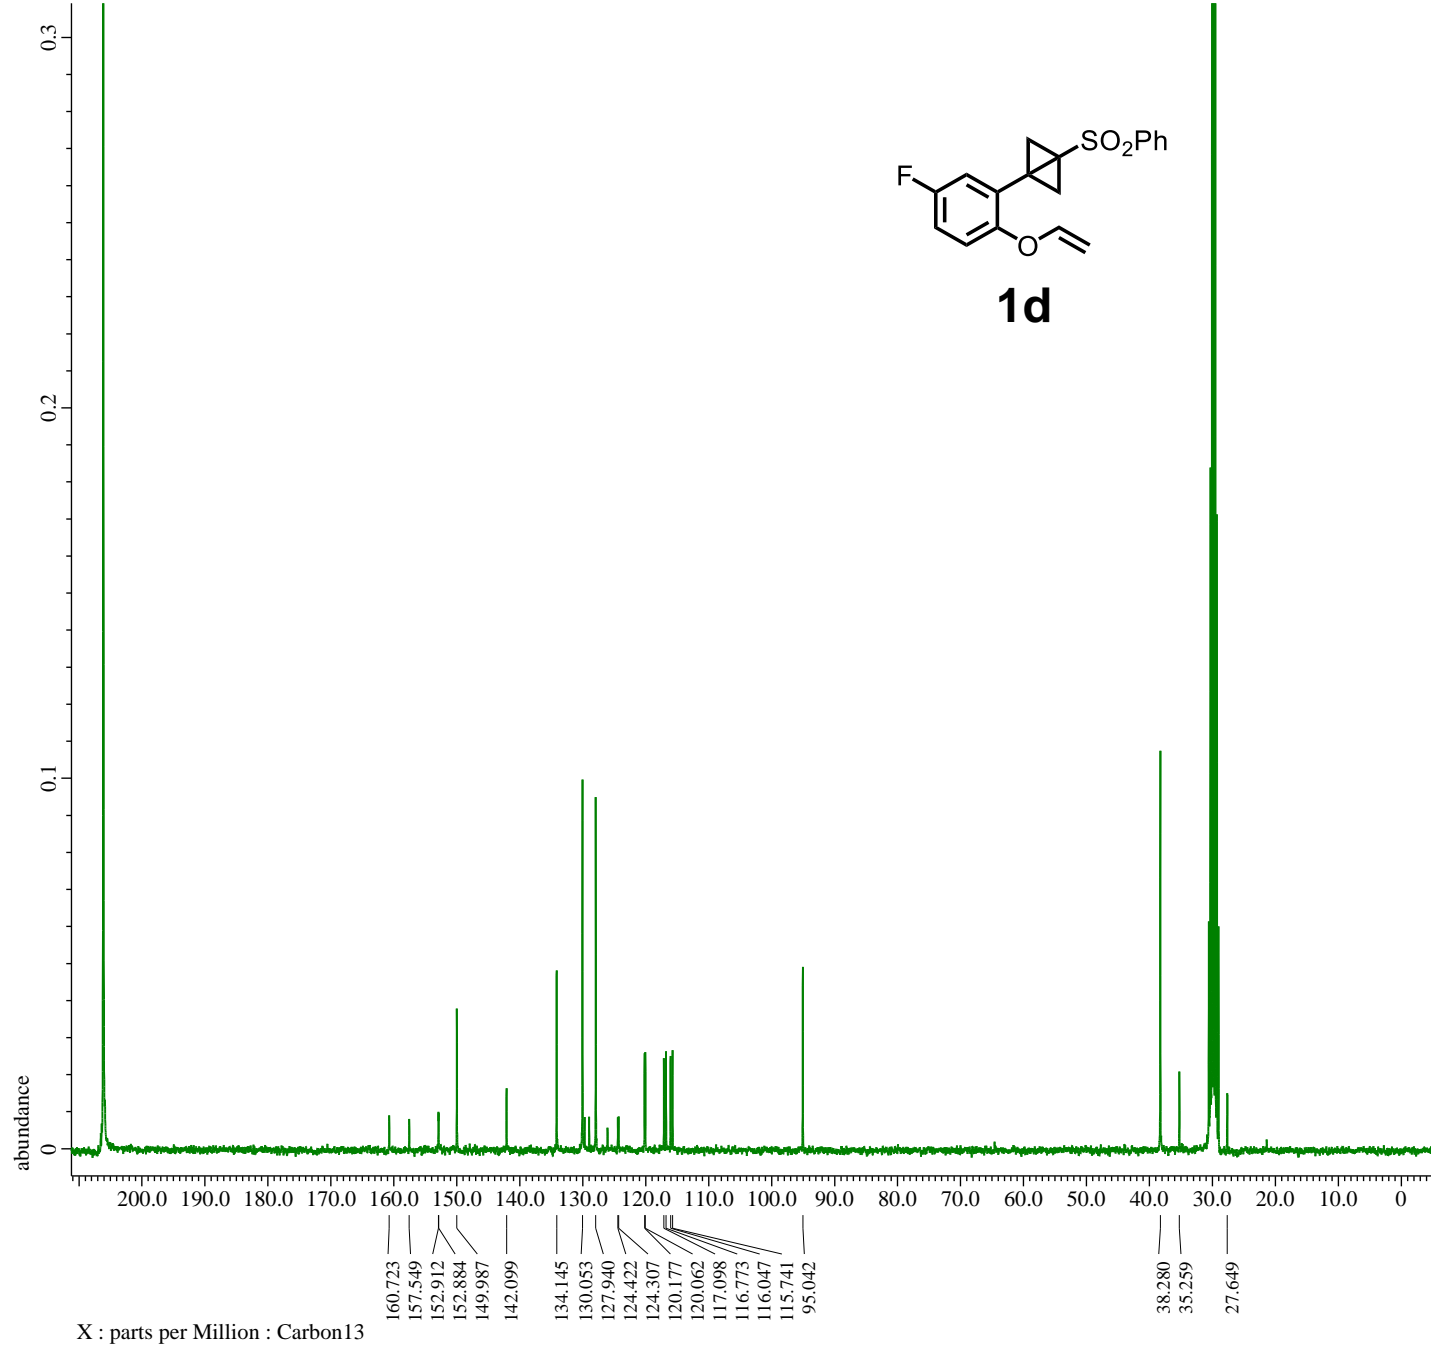

```

---- PROCESSING PARAMETERS ----
dc_balance( 0, FALSE )
sexp( 2.0[Hz], 0.0[s] )
trapezoid( 0[%], 0[%], 80[%], 100[%] )
zerofill( 1, TRUE )
fft( 1, TRUE, TRUE )
machinephase
ppm

Filename           = 4 4-F Acetone-d6_Carbon-1
Author             = delta
Experiment         = carbon.jxp
Sample_Id          = 210581 Acetone-d6
Solvent            = ACETONE-D6
Actual_Start_Time  = 29-NOV-2022 18:05:13
Revision_Time      = 15-MAR-2023 19:16:30

Comment           = single pulse decoupled ga
Data_Format       = 1D COMPLEX
Dim_Size          = 26214
X_Domain          = Carbon
Dim_Title         = Carbon13
Dim_Units         = [ppm]
Dimensions        = X
Site              = ECS 300
Spectrometer      = DELTA2_NMR

Field_Strength    = 7.0586013[T] (300[MHz])
X_Acq_Duration    = 1.38412032[s]
X_Domain          = 13C
X_Freq            = 75.56823426[MHz]
X_Offset          = 100[ppm]
X_Points          = 32768
X_Prescans        = 4
X_Resolution      = 0.72248054[Hz]
X_Sweep           = 23.67424242[kHz]
X_Sweep_Clipped  = 18.93939394[kHz]
Irr_Domain        = Proton
Irr_Freq          = 300.52965592[MHz]
Irr_Offset        = 5[ppm]
Clipped           = FALSE
Scans             = 1024
Total_Scans       = 1024

Relaxation_Delay  = 2[s]
Recvr_Gain        = 50
Temp_Get          = 20.8[dC]
X_90_Width        = 11.4[us]
X_Acq_Time        = 1.38412032[s]
X_Angle           = 30[deg]
X_Atn             = 5.4[dB]
X_Pulse           = 3.8[us]
Irr_Atn_Dec       = 21.6[dB]
Irr_Atn_Noise    = 21.6[dB]
Irr_Noise         = WALTZ
Irr_Pwidth        = 0.118[ms]
Decoupling        = TRUE
Initial_Wait      = 1[s]
Noe               = TRUE
Noe_Time          = 2[s]
Repetition_Time   = 3.38412032[s]

```

X : parts per Million : Carbon13

<sup>13</sup>C NMR spectrum of **1d** (76 MHz, Acetone-d<sub>6</sub>)

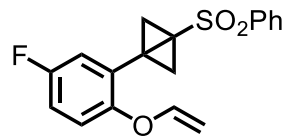

**1d**

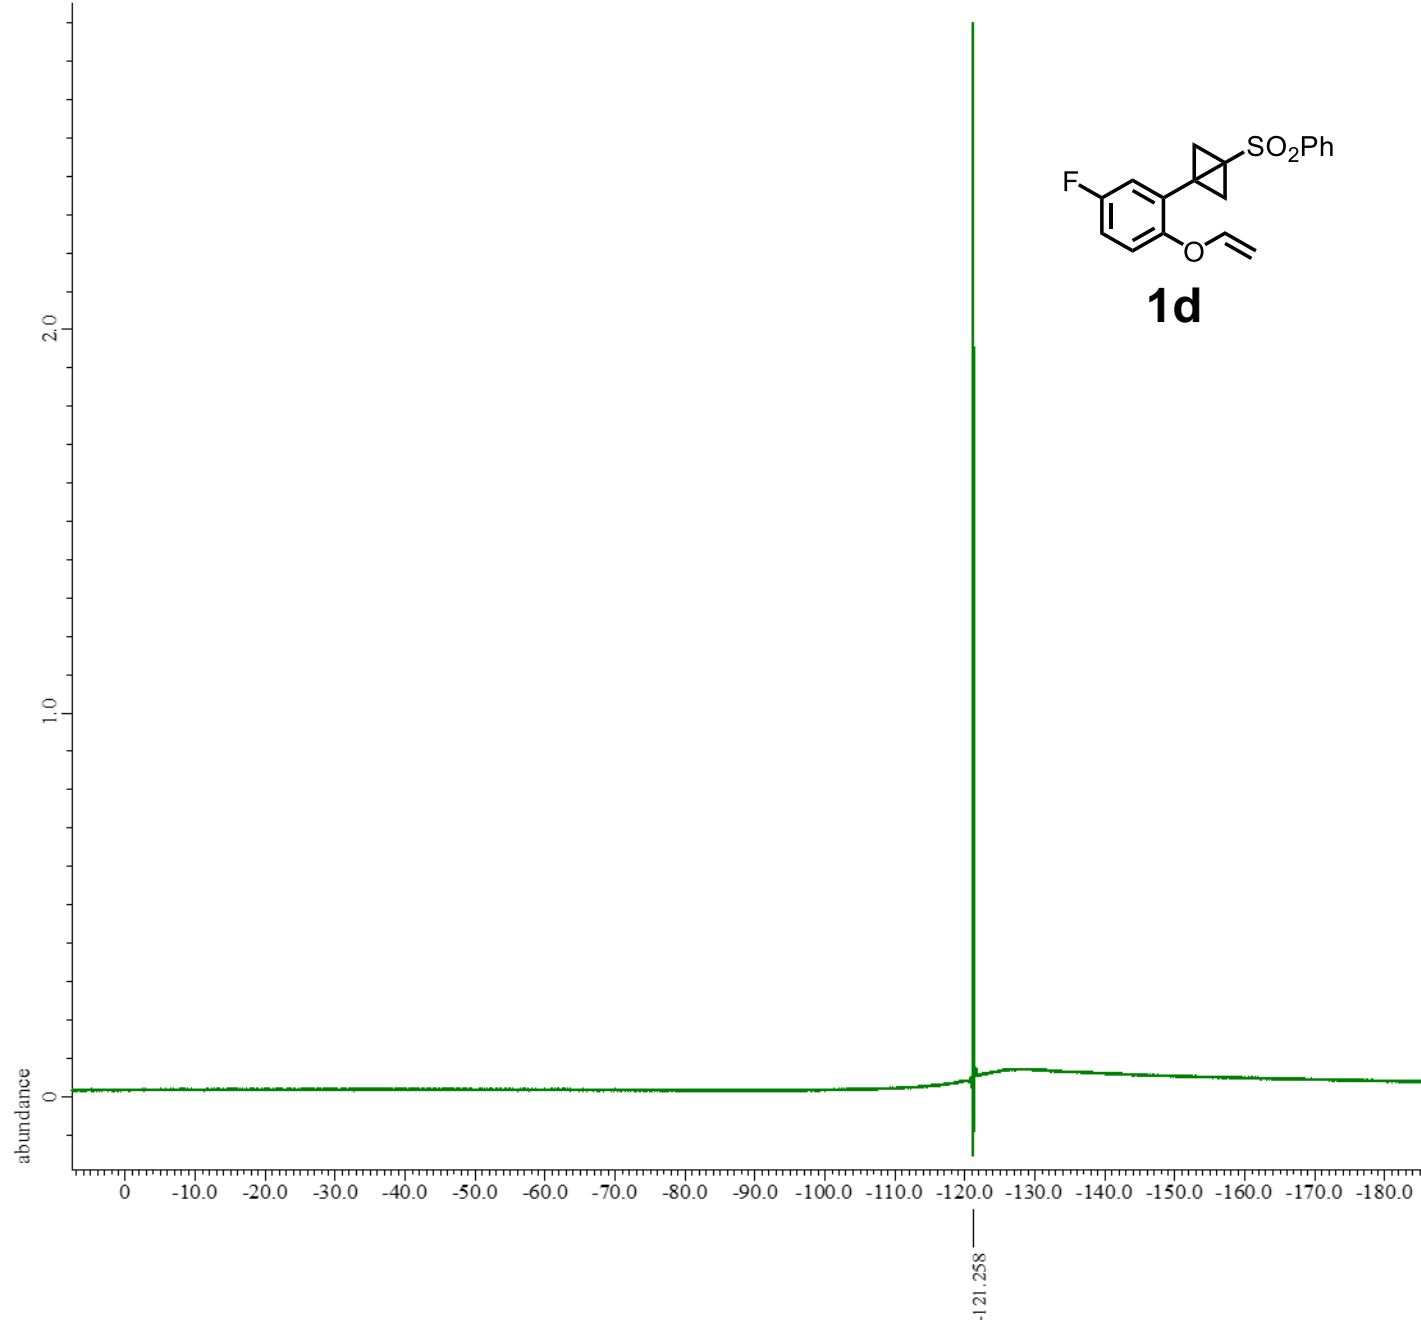

X : parts per Million : Fluorine19

```

---- PROCESSING PARAMETERS ----
dc balance( 0, FALSE )
sexp( 0.2[Hz], 0.0[s] )
trapezoid( 0[8], 0[8], 80[8], 100[8] )
zerofill( 1, TRUE )
fft( 1, TRUE, TRUE )
machinephase
ppm

Filename           = 4 4-F Acetone-d6_single_p
Author              = delta
Experiment          = single_pulse.jxp
Sample Id           = 210581 Acetone-d6
Solvent             = ACETONE-D6
Actual Start Time   = 29-NOV-2022 17:56:45
Revision Time       = 17-MAR-2023 15:50:34

Comment            = single pulse
Data Format          = 1D COMPLEX
Dim Size           = 13107
X_Domain           = Fluori
Dim Title           = Fluorine19
Dim Units           = [ppm]
Dimensions          = X
Site                = ECS 300
Spectrometer        = DELTA2_NMR

Field Strength      = 7.0586013[T] (300 [MHz])
X_Acq_Duration      = 0.15368192 [s]
X_Domain            = 19F
X_Freq              = 282.78036857 [MHz]
X_Offset            = -80 [ppm]
X Points            = 16384
X_Prescans          = 1
X_Resolution        = 6.5069463 [Hz]
X_Sweep             = 106.6098081 [kHz]
X_Sweep_Clippped    = 85.28784648 [kHz]
Irr_Domain          = Fluorine19
Irr_Freq            = 282.78036857 [MHz]
Irr_Offset          = 5 [ppm]
Tri_Domain          = Fluorine19
Tri_Freq            = 282.78036857 [MHz]
Tri_Offset          = 5 [ppm]
Clipped             = FALSE
Scans               = 64
Total_Scans         = 64

Relaxation Delay    = 5 [s]
Recvr Gain          = 32
Temp_Get            = 20.3 [dC]
X_90_Width          = 12 [us]
X_Acq_Time          = 0.15368192 [s]
X_Angle             = 45 [deg]
X_Atn               = 2.8 [dB]
X_Pulse             = 6 [us]
Irr_Mode            = Off
Tri_Mode            = Off
DanTe_Presat        = FALSE
Initial Wait        = 1 [s]
Repetition Time     = 5.15368192 [s]

```



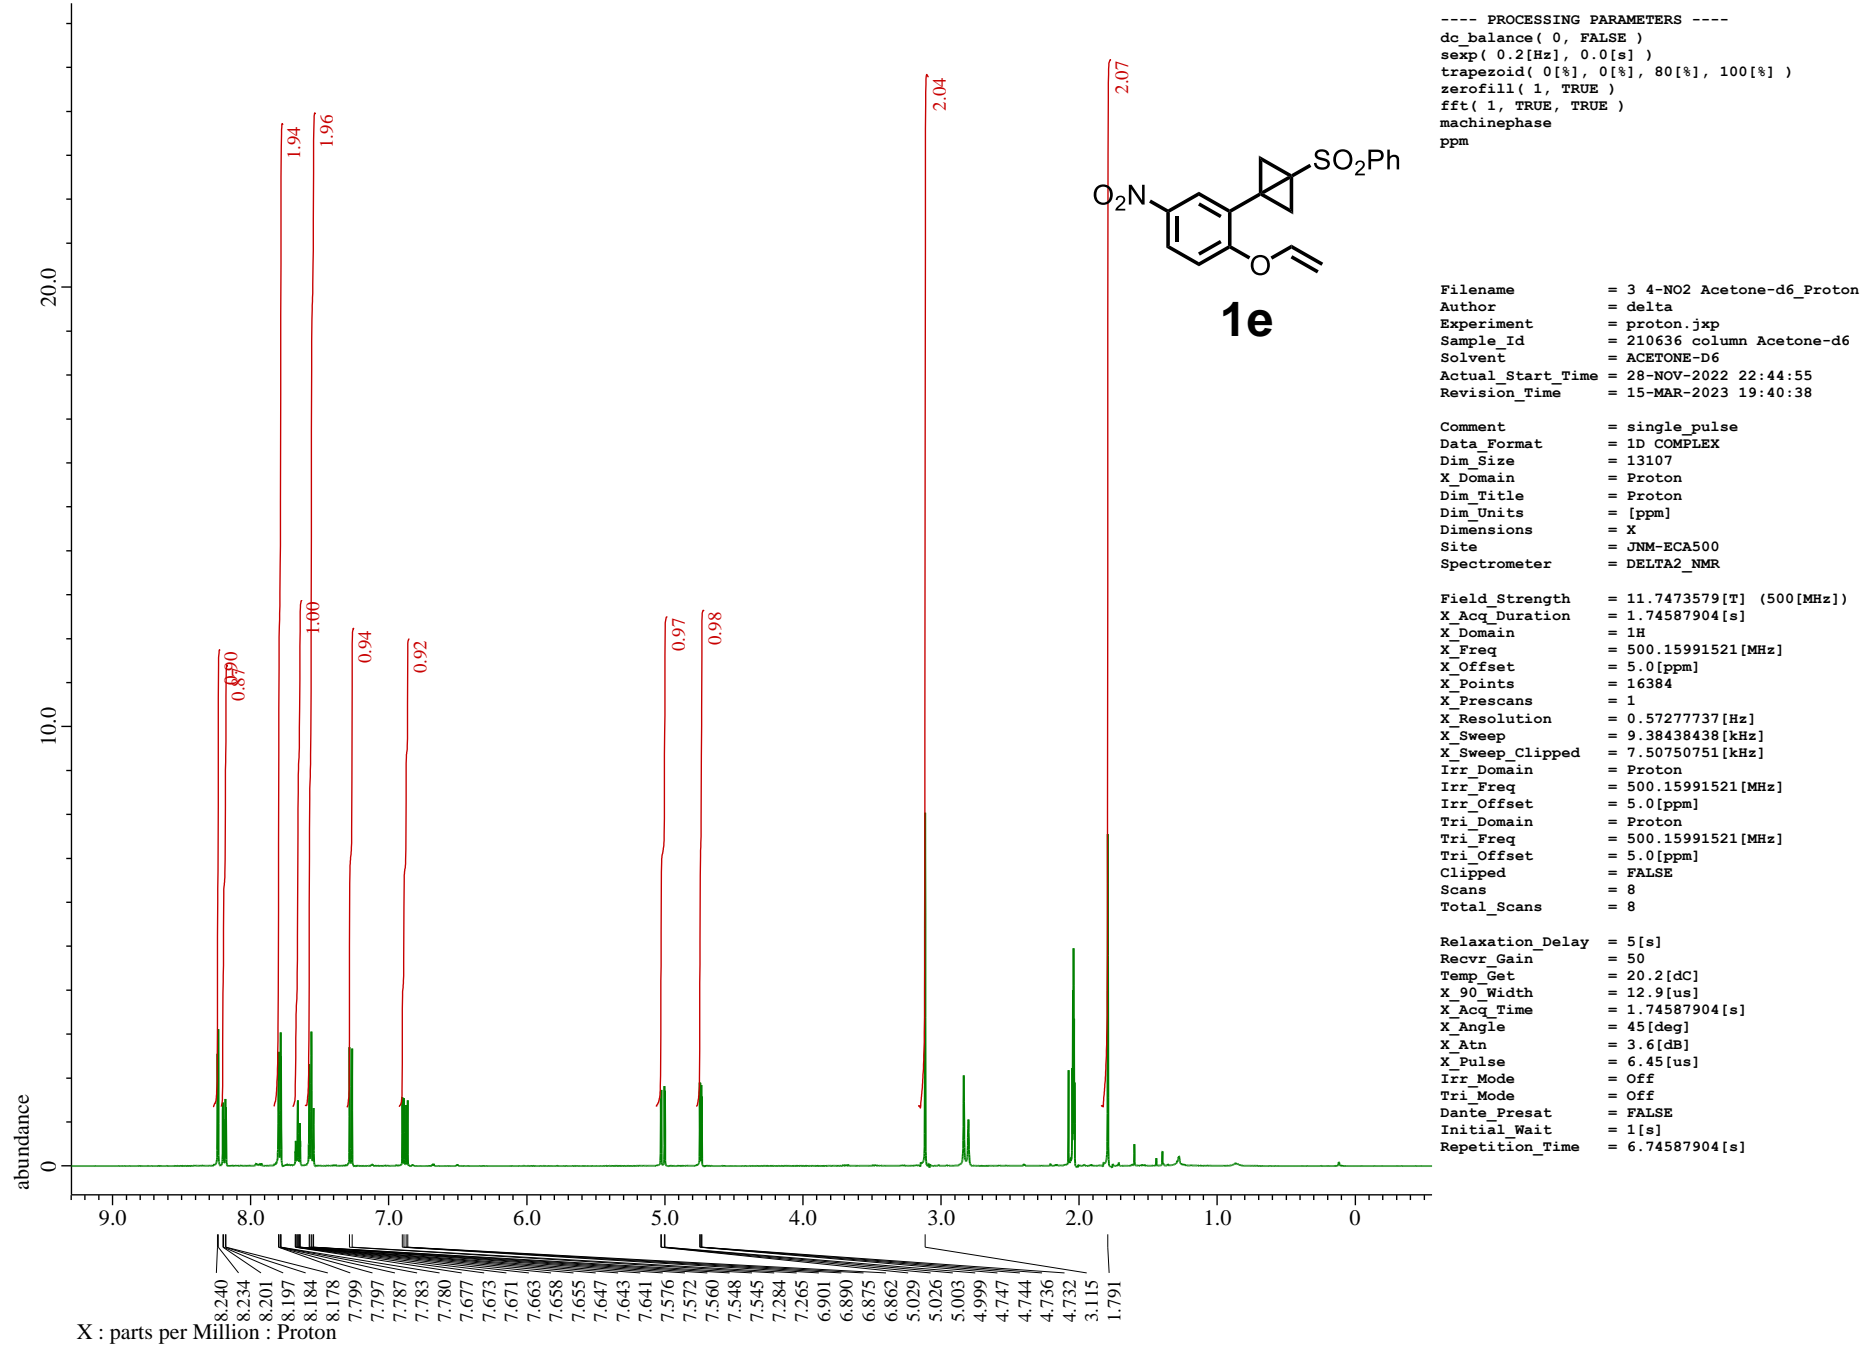

<sup>1</sup>H NMR spectrum of **1e** (500 MHz, Acetone-*d*<sub>6</sub>)

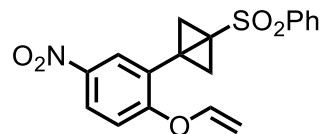

**1e**

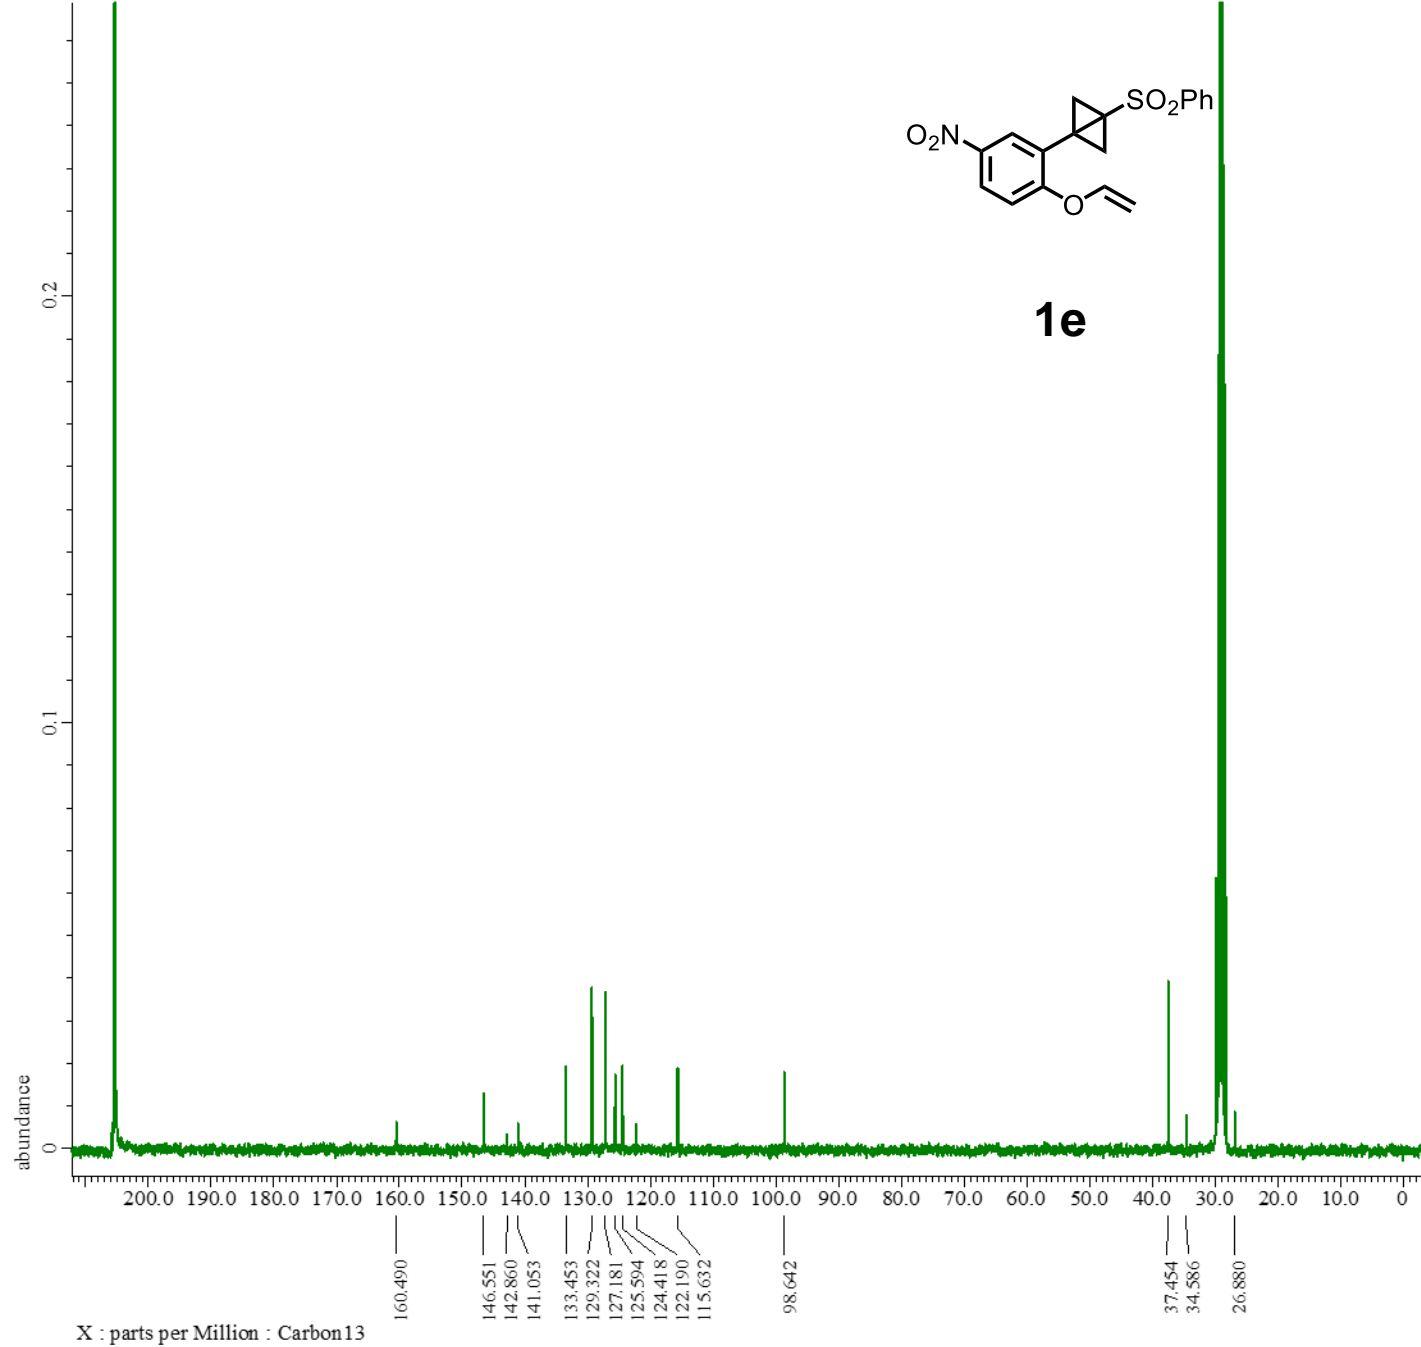

```

---- PROCESSING PARAMETERS ----
dc balance( 0, FALSE )
sexp( 2.0[Hz], 0.0[s] )
trapezoid( 0[8], 0[8], 80[8], 100[8] )
zerofill( 1, TRUE )
fft( 1, TRUE, TRUE )
machinephase
ppm

Filename      = 3 4-NO2 Acetone-d6_Carbon
Author       = delta
Experiment   = carbon.jxp
Sample Id    = 210636 column Acetone-d6
Solvent      = ACETONE-D6
Actual Start Time = 29-NOV-2022 10:05:34
Revision Time   = 4-JAN-2023 15:48:19

Comment      = single pulse decoupled ga
Data Format   = 1D COMPLEX
Dim Size     = 26214
X_Domain     = Carbon
Dim Title    = Carbon13
Dim Units    = [ppm]
Dimensions   = X
Site         = ECS 300
Spectrometer = DELTA2_NMR

Field Strength = 7.0586013[T] (300 [MHz])
X_Acq_Duration = 1.38412032 [s]
X_Domain       = 13C
X_Freq         = 75.56823426 [MHz]
X_Offset       = 100 [ppm]
X Points      = 32768
X_Prescans    = 4
X_Resolution  = 0.72248054 [Hz]
X_Sweep       = 23.67424242 [kHz]
X_Sweep_Clippped = 18.93939394 [kHz]
Irr_Domain    = Proton
Irr_Freq      = 300.52965592 [MHz]
Irr_Offset    = 5 [ppm]
Clipped       = FALSE
Scans         = 928
Total_Scans   = 928

Relaxation_Delay = 2 [s]
Recvr Gain       = 50
Temp_Get        = 21 [dC]
X_90_Width     = 11.4 [us]
X_Acq_Time     = 1.38412032 [s]
X_Angle        = 30 [deg]
X_Atn          = 5.4 [dB]
X_Pulse       = 3.8 [us]
Irr_Atn_Dec    = 21.6 [dB]
Irr_Atn_Noe    = 21.6 [dB]
Irr_Noise      = WALTZ
Irr_Pwidth     = 0.118 [ms]
Decoupling     = TRUE
Initial_Wait   = 1 [s]
Noe            = TRUE
Noe Time       = 2 [s]
Repetition Time = 3.38412032 [s]

```

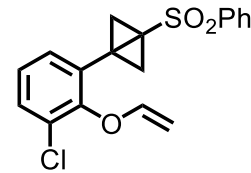

**1f**

```

---- PROCESSING PARAMETERS ----
dc balance( 0, FALSE )
sexp( 0.2[Hz], 0.0[s] )
trapezoid( 0[8], 0[8], 80[8], 100[8] )
zerofill( 1, TRUE )
fft( 1, TRUE, TRUE )
machinephase
ppm

Filename      = 7_6-Cl_CDC13_Proton-1-2.j
Author       = delta
Experiment   = proton.jxp
Sample Id    = 210577 column2 CDC13
Solvent      = CHLOROFORM-D
Actual Start Time = 3-OCT-2022 22:24:07
Revision Time   = 4-JAN-2023 15:30:14

Comment      = single pulse
Data Format   = 1D COMPLEX
Dim Size     = 13107
X_Domain    = Proton
Dim Title    = Proton
Dim Units    = [ppm]
Dimensions   = X
Site         = ECS 300
Spectrometer = DELTA2_NMR

Field Strength = 7.0586013[T] (300 [MHz])
X_Acq_Duration = 2.90717696 [s]
X_Domain       = 1H
X_Freq        = 300.52965592 [MHz]
X_Offset      = 5 [ppm]
X_Points      = 16384
X_Prescans    = 1
X_Resolution  = 0.34397631 [Hz]
X_Sweep       = 5.63570784 [kHz]
X_Sweep_Clipped = 4.50856628 [kHz]
Irr_Domain    = Proton
Irr_Freq      = 300.52965592 [MHz]
Irr_Offset    = 5 [ppm]
Tri_Domain    = Proton
Tri_Freq      = 300.52965592 [MHz]
Tri_Offset    = 5 [ppm]
Clipped       = FALSE
Scans         = 8
Total_Scans   = 8

Relaxation_Delay = 5 [s]
Recvr_Gain       = 48
Temp_Get         = 20.6 [dC]
X_90_Width      = 11 [us]
X_Acq_Time      = 2.90717696 [s]
X_Angle         = 45 [deg]
X_Atn           = 1 [dB]
X_Pulse         = 5.5 [us]
Irr_Mode        = Off
Tri_Mode        = Off
Dante_Presat    = FALSE
Initial_Wait    = 1 [s]
Repetition_Time = 7.90717696 [s]

```

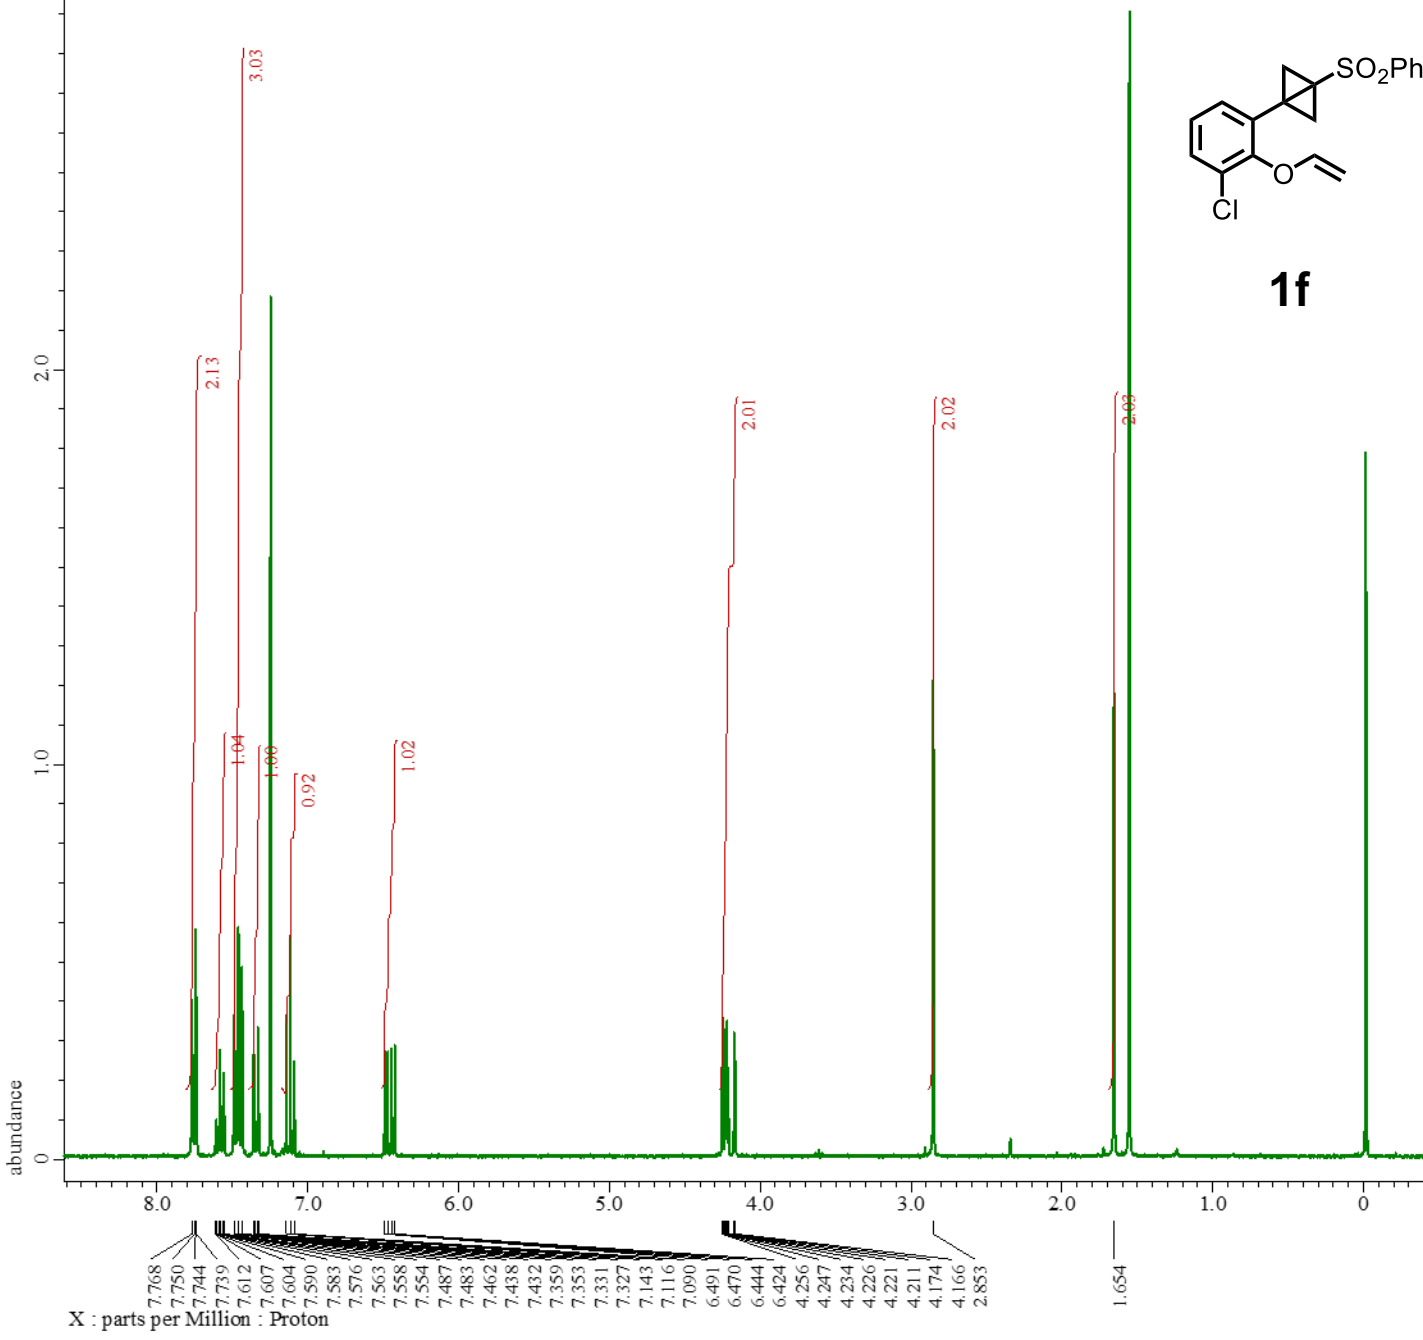

<sup>1</sup>H NMR spectrum of **1f** (301 MHz, Acetone-*d*<sub>6</sub>)

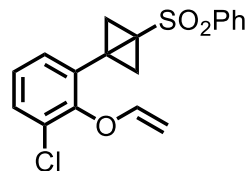

**1f**

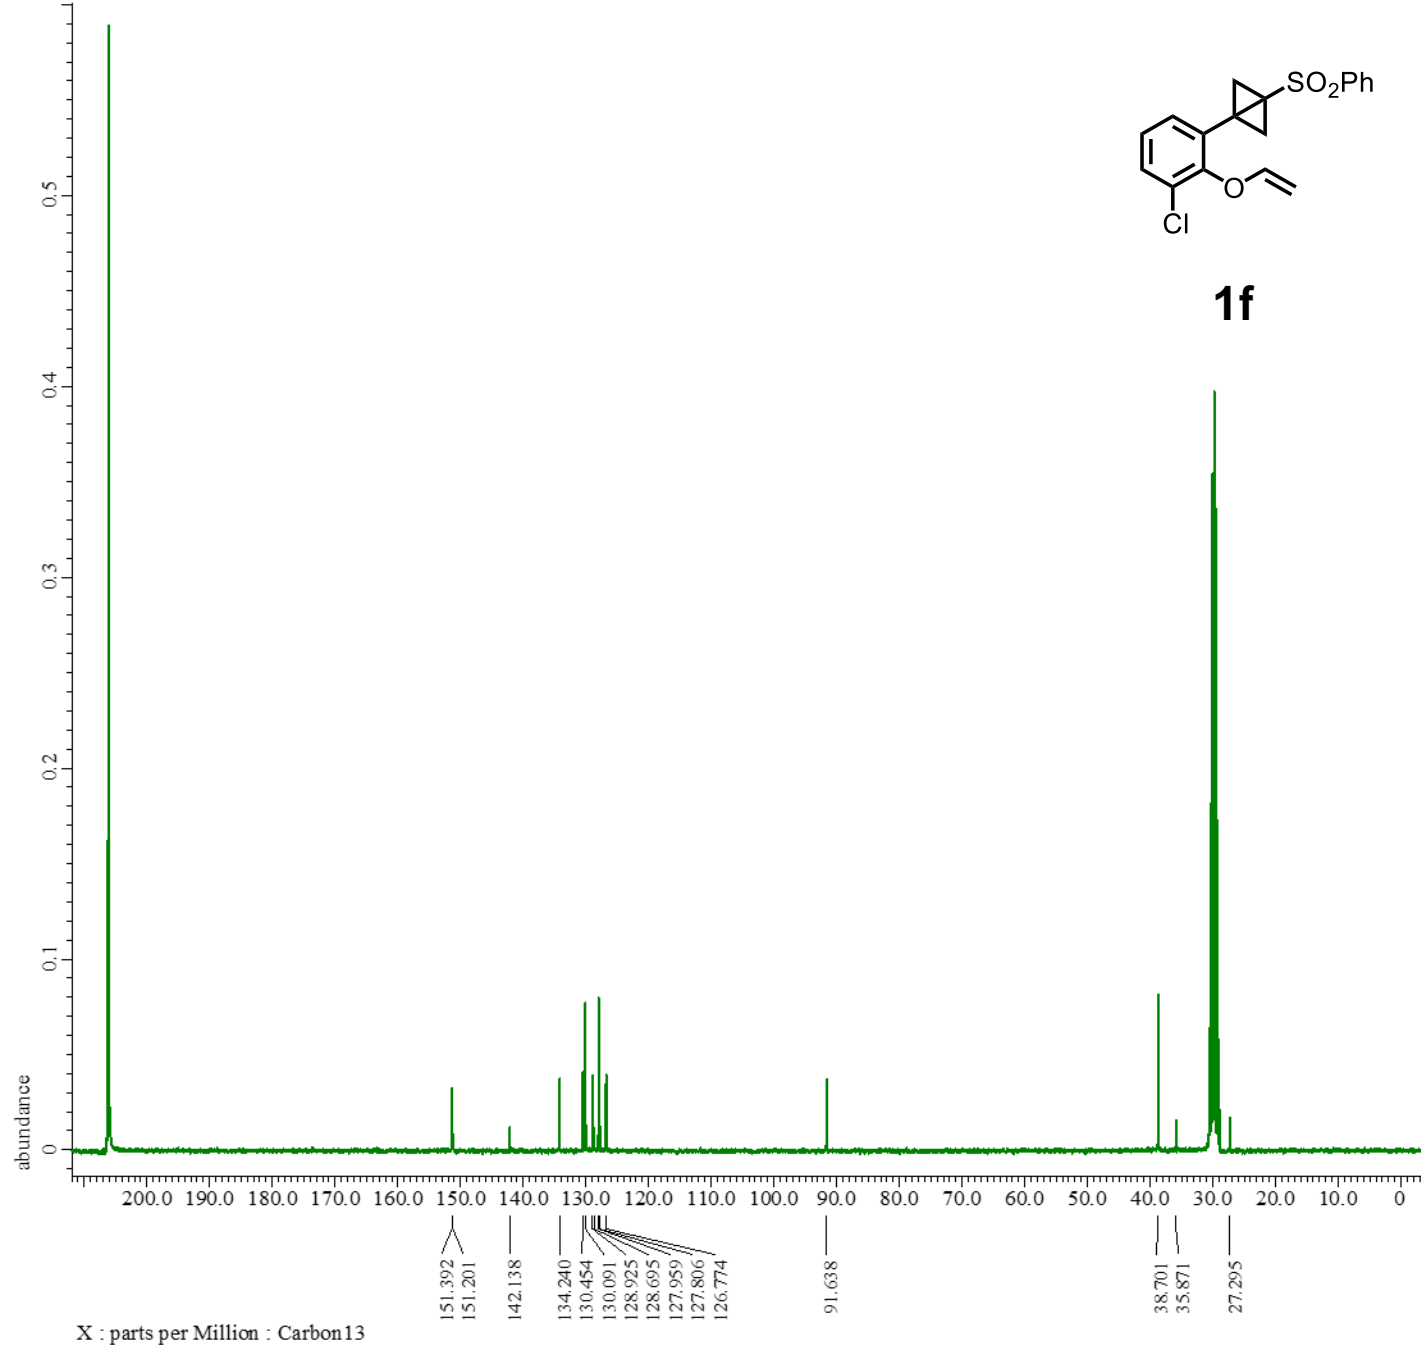

```

---- PROCESSING PARAMETERS ----
dc balance( 0, FALSE )
sexp( 2.0[Hz], 0.0[s] )
trapezoid( 0[8], 0[8], 80[8], 100[8] )
zerofill( 1 )
fft( 1, TRUE, TRUE )
machinephase
ppm

Filename      = 7_6-Cl_Acetone-d6_Carbon-
Author       = delta
Experiment   = carbon.jxp
Sample Id    = 210655 column Acetone-d6
Solvent      = ACETONE-D6
Actual Start Time = 18-DEC-2022 16:31:37
Revision Time   = 4-JAN-2023 15:40:21

Comment      = single pulse decoupled ga
Data Format   = 1D COMPLEX
Dim Size     = 26214
X_Domain     = Carbon
Dim Title    = Carbon13
Dim Units    = [ppm]
Dimensions   = X
Site         = ECS 300
Spectrometer = DELTA2_NMR

Field Strength = 7.0586013[T] (300 [MHz])
X_Acq_Duration = 1.38412032 [s]
X_Domain       = 13C
X_Freq         = 75.56823426 [MHz]
X_Offset       = 100 [ppm]
X Points       = 32768
X_Prescans     = 4
X_Resolution   = 0.72248054 [Hz]
X_Sweep        = 23.67424242 [kHz]
X_Sweep_Clippped = 18.93939394 [kHz]
Irr_Domain     = Proton
Irr_Freq       = 300.52965592 [MHz]
Irr_Offset     = 5 [ppm]
Clipped        = TRUE
Scans          = 1500
Total_Scans    = 1500

Relaxation_Delay = 2 [s]
Recvr Gain       = 50
Temp_Get         = 18.8 [dC]
X_90_Width      = 11.4 [us]
X_Acq_Time      = 1.38412032 [s]
X_Angle         = 30 [deg]
X_Atn           = 5.4 [dB]
X_Pulse         = 3.8 [us]
Irr_Atn_Dec     = 21.6 [dB]
Irr_Atn_No     = 21.6 [dB]
Irr_Noise       = WALTZ
Irr_Pwidth      = 0.118 [ms]
Decoupling      = TRUE
Initial_Wait    = 1 [s]
Noe              = TRUE
Noe_Time        = 2 [s]
Repetition Time = 3.38412032 [s]

```

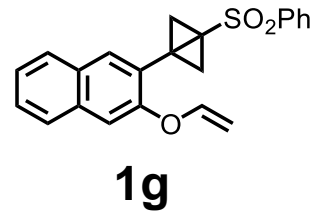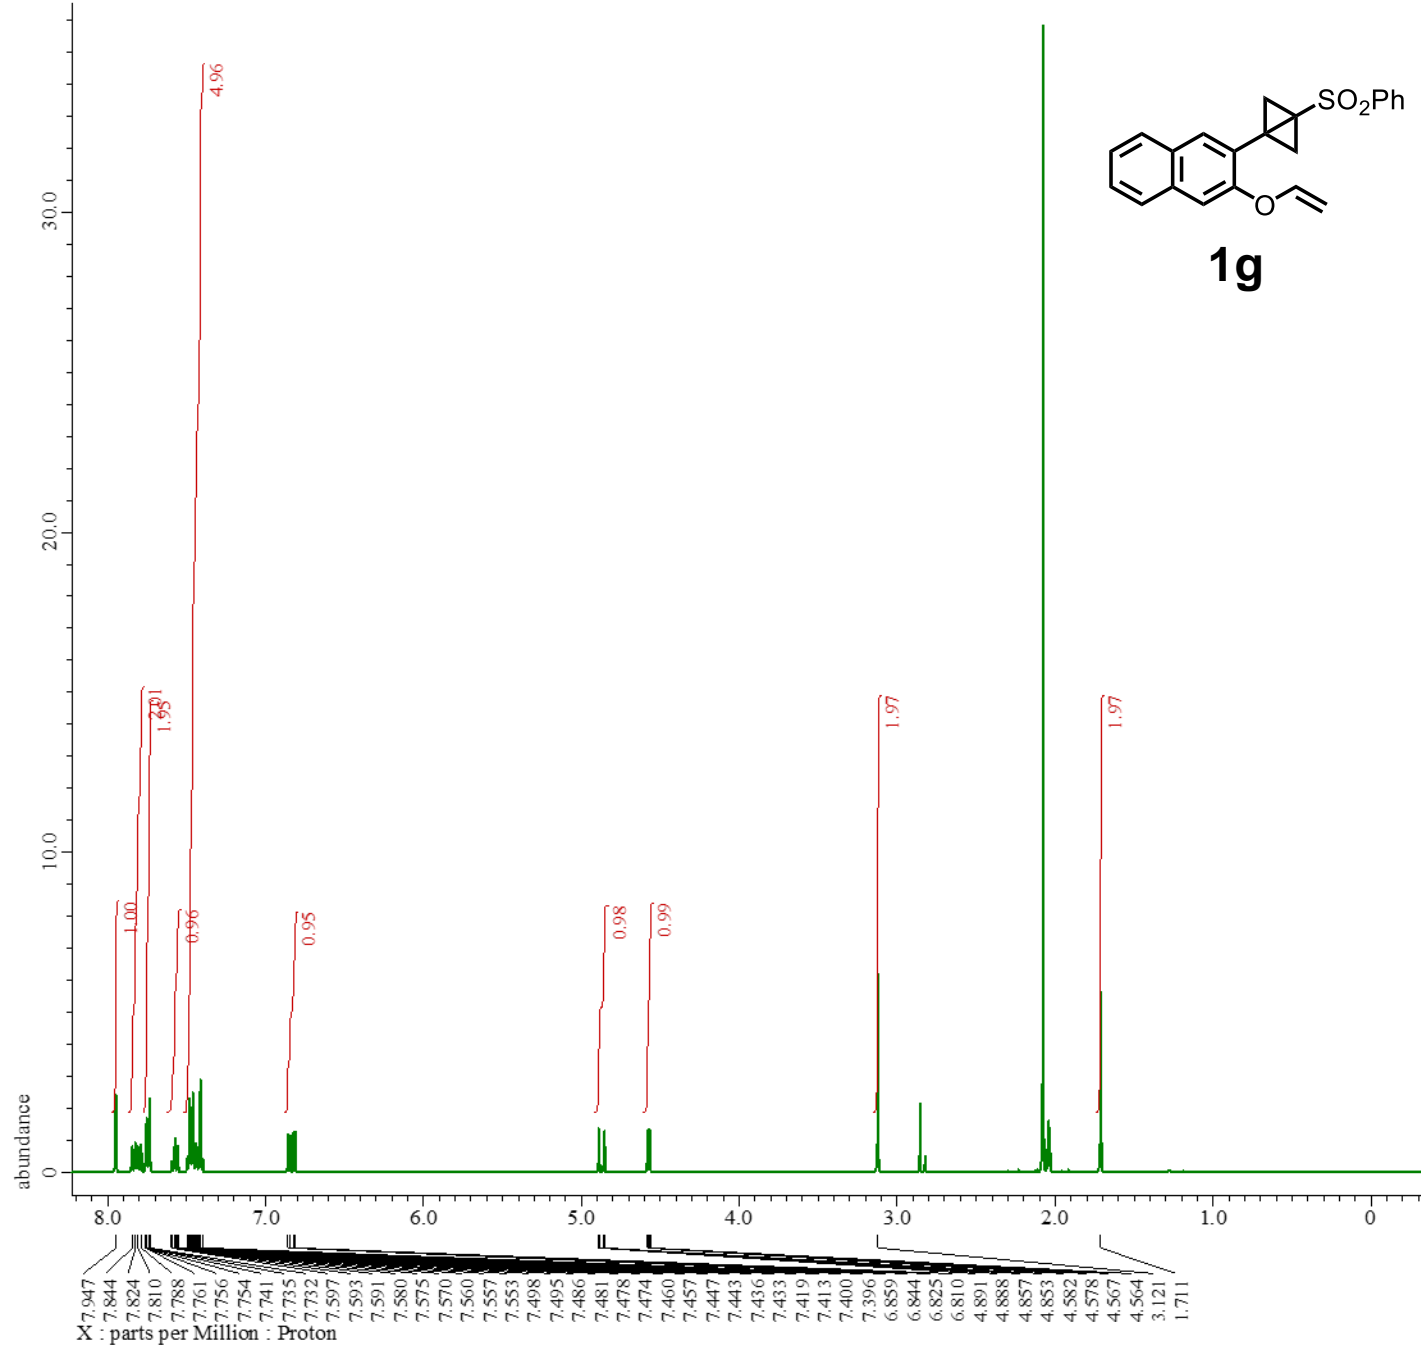

```

---- PROCESSING PARAMETERS ----
dc balance( 0, FALSE )
sexp( 0.2[Hz], 0.0[s] )
trapezoid( 0[8], 0[8], 80[8], 100[8] )
zerofill( 1, TRUE )
fft( 1, TRUE, TRUE )
machinephase
ppm

Filename           = 6_2,3-naphthyl Acetone-d6
Author            = delta
Experiment        = proton.jxp
Sample Id         = 2,3-naphthyl Acetone-d6
Solvent          = ACETONE-D6
Actual Start Time = 29-NOV-2022 22:25:34
Revision Time    = 4-JAN-2023 16:46:55

Comment           = single pulse
Data Format        = 1D COMPLEX
Dim Size          = 13107
X_Domain          = Proton
Dim Title         = Proton
Dim Units         = [ppm]
Dimensions        = X
Site              = ECS 400
Spectrometer      = DELTA2_NMR

Field Strength    = 9.389766[T] (400[MHz])
X_Acq_Duration   = 2.18365952[s]
X_Domain         = 1H
X_Freq           = 399.78219838[MHz]
X_Offset         = 5[ppm]
X_Points         = 16384
X_Prescans       = 1
X_Resolution     = 0.45794685[Hz]
X_Sweep          = 7.5030012[kHz]
X_Sweep_Clipped  = 6.00240096[kHz]
Irr_Domain       = Proton
Irr_Freq         = 399.78219838[MHz]
Irr_Offset       = 5[ppm]
Tri_Domain       = Proton
Tri_Freq         = 399.78219838[MHz]
Tri_Offset       = 5[ppm]
Clipped          = FALSE
Scans            = 16
Total_Scans      = 16

Relaxation Delay  = 5[s]
Recvr_Gain        = 36
Temp_Get          = 19.6[dc]
X_90_Width        = 12.4[us]
X_Acq_Time        = 2.18365952[s]
X_Angle           = 45[deg]
X_Atn             = 3[dB]
X_Pulse           = 6.2[us]
Irr_Mode          = Off
Tri_Mode          = Off
DanTe_Presat     = FALSE
Initial Wait      = 1[s]
Repetition Time   = 7.18365952[s]
  
```

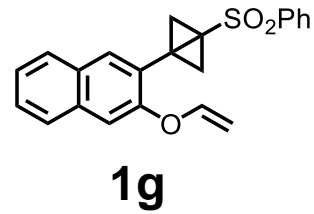

```

---- PROCESSING PARAMETERS ----
dc balance( 0, FALSE )
sexp( 2.0[Hz], 0.0[s] )
trapezoid( 0[8], 0[8], 80[8], 100[8] )
zerofill( 1, TRUE )
fft( 1, TRUE, TRUE )
machinephase
ppm

```

```

Filename      = 6 2,3-naphthyl Acetone-d6
Author        = delta
Experiment    = carbon.jxp
Sample Id     = 2,3-naphthyl Acetone-d6
Solvent       = ACETONE-D6
Actual Start Time = 2-DEC-2022 00:06:27
Revision Time  = 11-FEB-2023 18:39:20

```

```

Comment       = single pulse decoupled ga
Data Format    = 1D COMPLEX
Dim Size      = 26214
X_Domain      = Carbon
Dim Title     = Carbon13
Dim Units     = [ppm]
Dimensions    = X
Site          = ECS 400
Spectrometer  = DELTA2_NMR

```

```

Field Strength = 9.389766[T] (400[MHz])
X_Acq_Duration = 1.04333312[s]
X_Domain       = 13C
X_Freq         = 100.52530333[MHz]
X_Offset       = 100[ppm]
X_Points       = 32768
X_Prescans    = 4
X_Resolution   = 0.95846665[Hz]
X_Sweep        = 31.40703518[kHz]
X_Sweep_Clipped = 25.12562814[kHz]
Irr_Domain     = Proton
Irr_Freq       = 399.78219838[MHz]
Irr_Offset     = 5[ppm]
Clipped        = FALSE
Scans          = 3450
Total_Scans    = 3450

```

```

Relaxation_Delay = 2[s]
Recvr Gain       = 50
Temp_Get         = 20[dC]
X_90_Width      = 9[us]
X_Acq_Time       = 1.04333312[s]
X_Angle          = 30[deg]
X_Atn            = 4.7[dB]
X_Pulse         = 3[us]
Irr_Atn_Dec     = 22.346[dB]
Irr_Atn_No     = 22.346[dB]
Irr_Noise       = WALTZ
Irr_Pwidth      = 0.115[ms]
Decoupling      = TRUE
Initial_Wait    = 1[s]
Noe              = TRUE
Noe Time        = 2[s]
Repetition Time = 3.04333312[s]

```

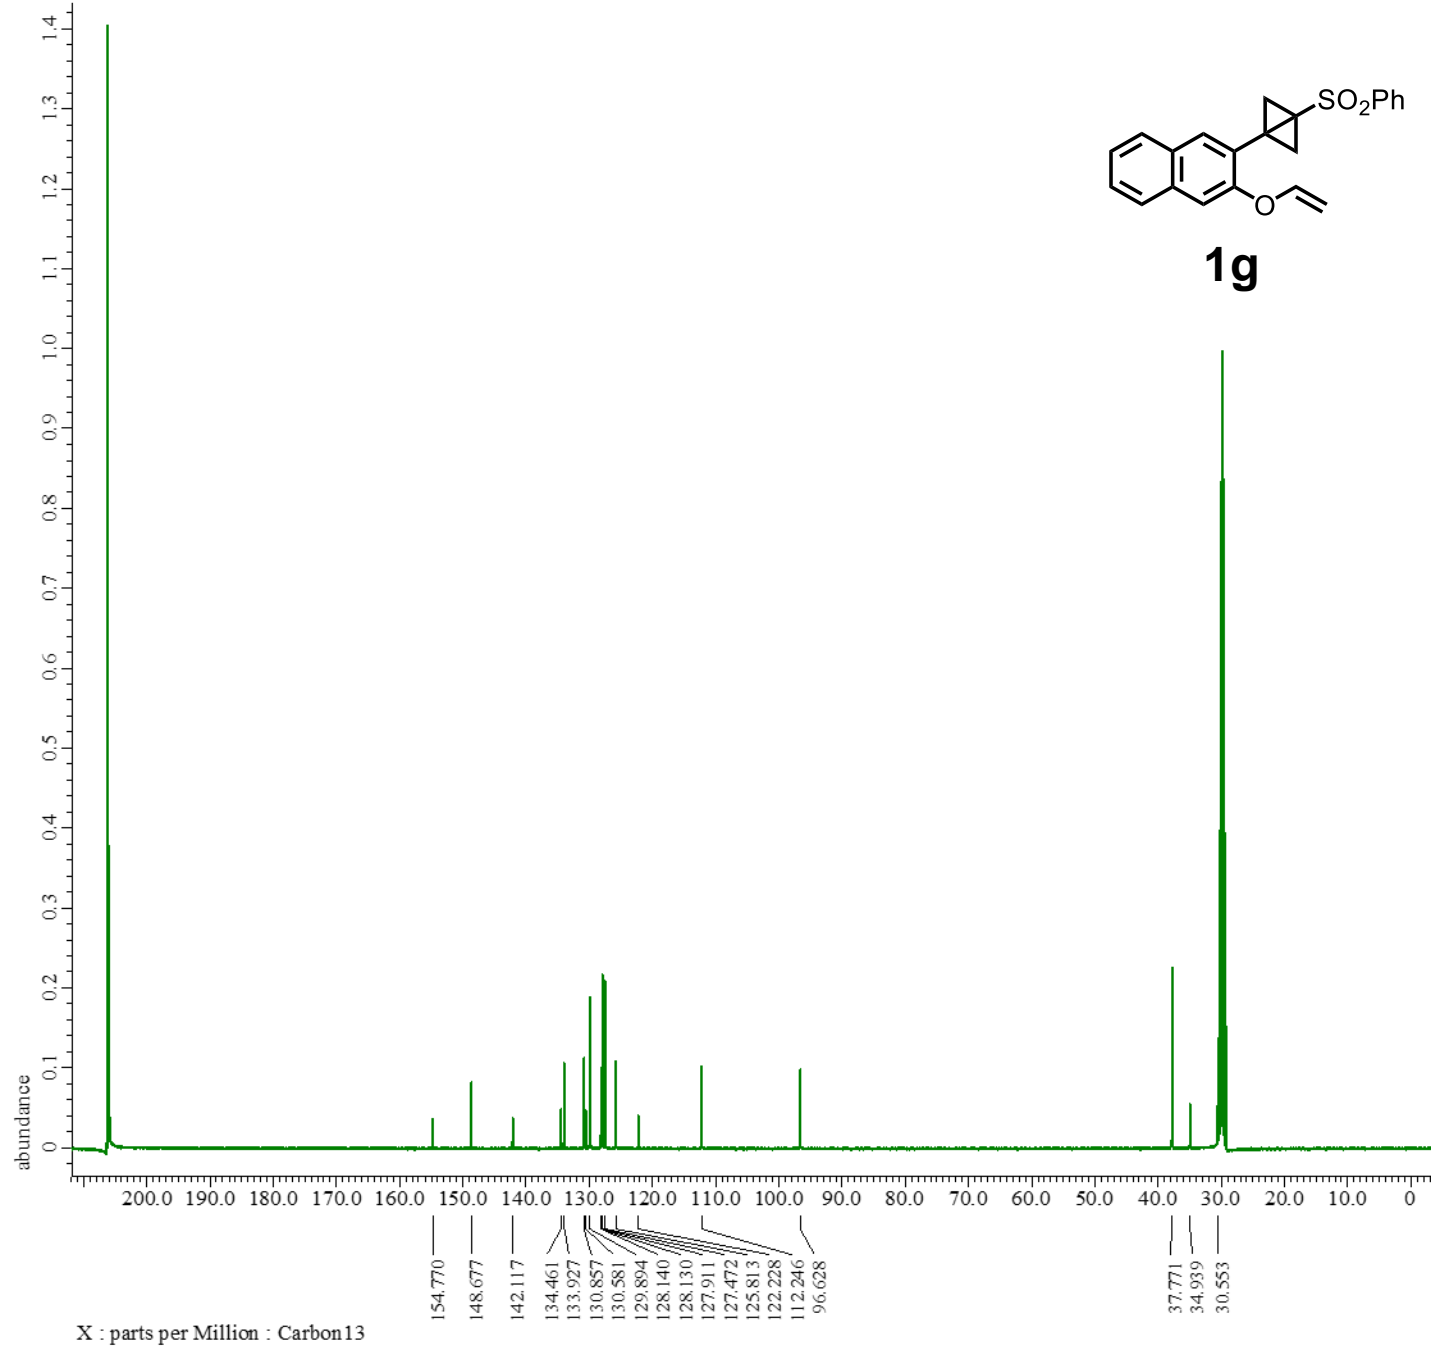

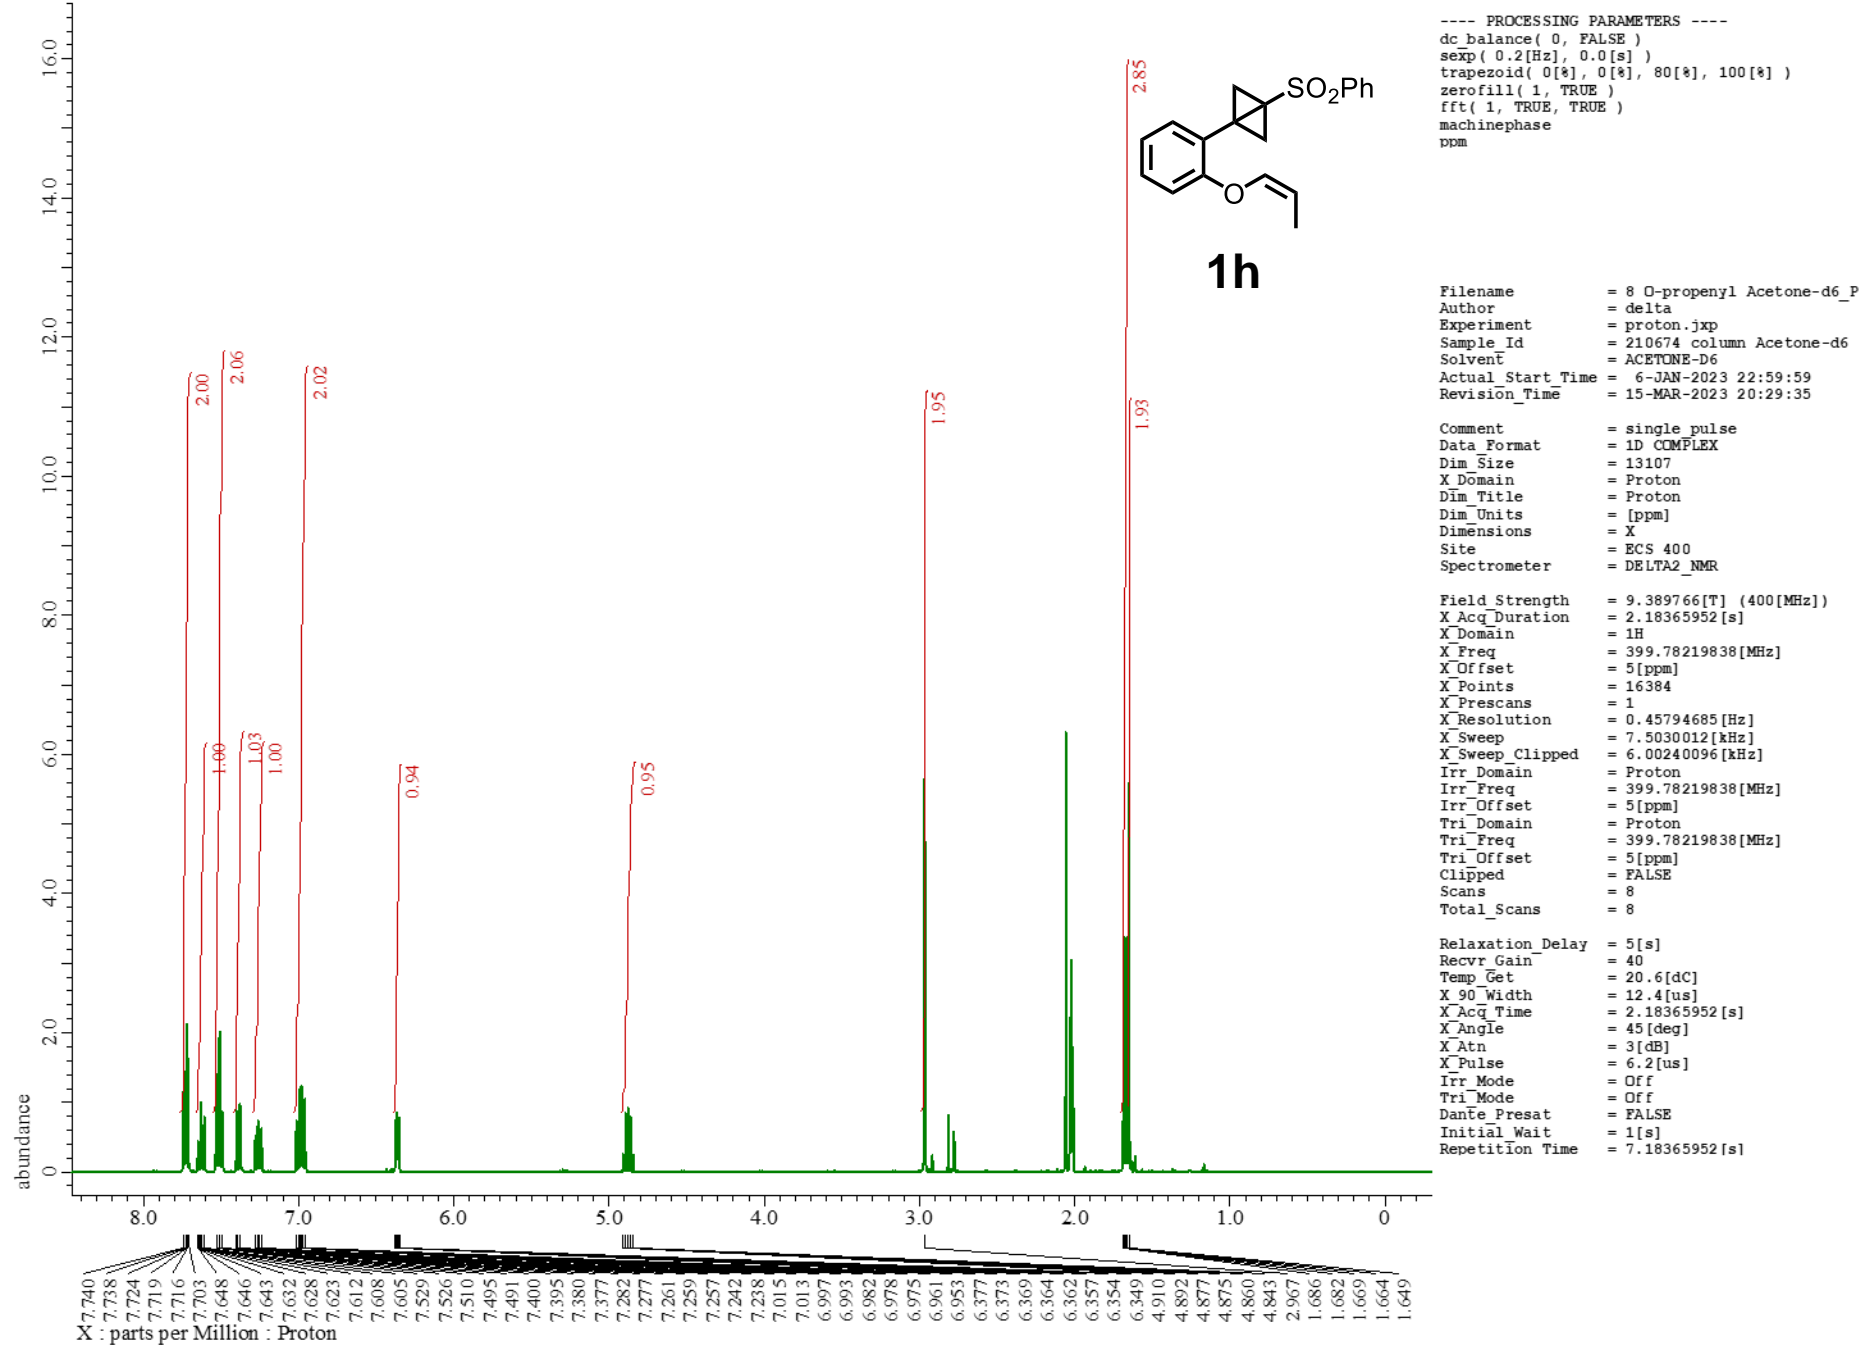

<sup>1</sup>H NMR spectrum of **1h** (400 MHz, Acetone-*d*<sub>6</sub>)

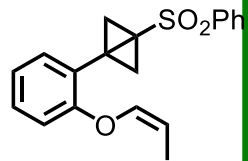

**1h**

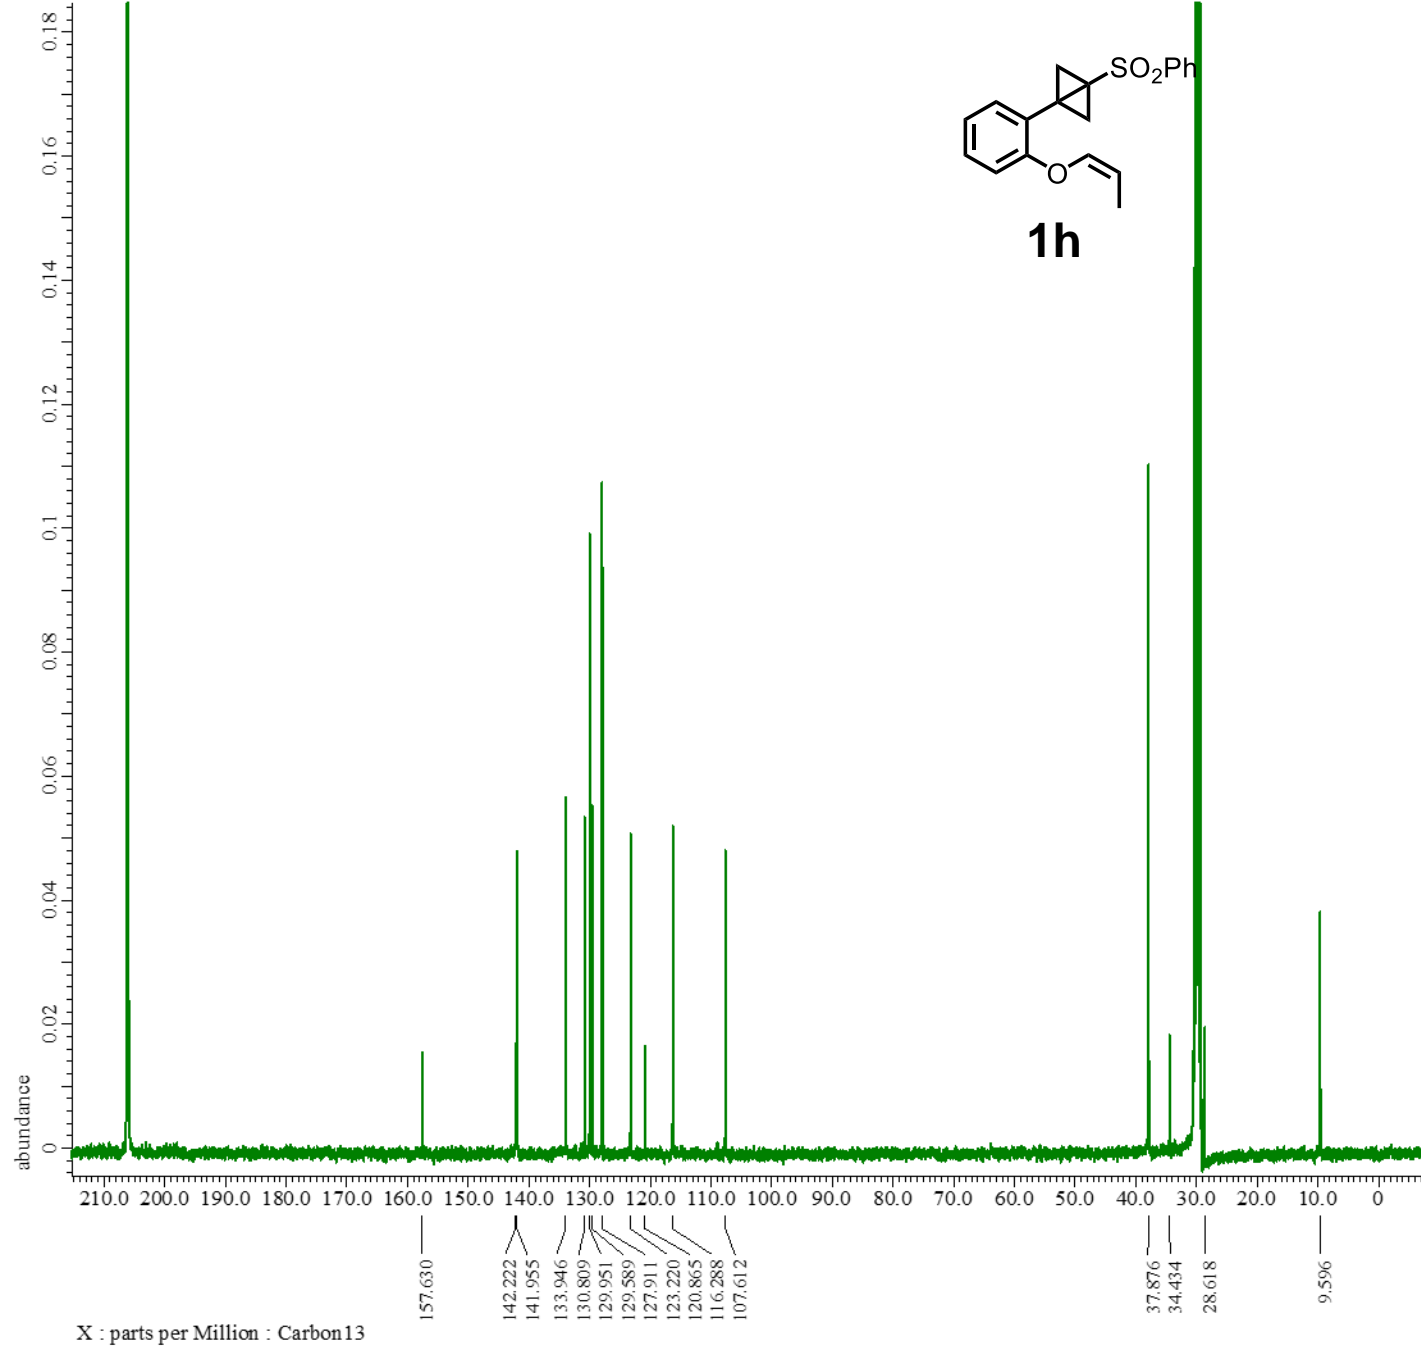

```

---- PROCESSING PARAMETERS ----
dc balance( 0, FALSE )
sexp( 2.0[Hz], 0.0[s] )
trapezoid( 0[8], 0[8], 80[8], 100[8] )
zerofill( 1, TRUE )
fft( 1, TRUE, TRUE )
machinephase
ppm

Filename      = 8 O-propenyl Acetone-d6_C
Author       = delta
Experiment   = carbon.jxp
Sample Id    = 210674 column Acetone-d6
Solvent      = ACETONE-D6
Actual Start Time = 7-JAN-2023 19:35:49
Revision Time  = 17-MAR-2023 15:58:15

Comment      = single pulse decoupled ga
Data Format   = 1D COMPLEX
Dim Size     = 26214
X_Domain    = Carbon
Dim Title    = Carbon13
Dim Units    = [ppm]
Dimensions   = X
Site         = ECS 400
Spectrometer = DELTA2_NMR

Field Strength = 9.389766[T] (400[MHz])
X Acq_Duration = 1.04333312[s]
X Domain       = 13C
X Freq        = 100.52530333[MHz]
X Offset      = 100[ppm]
X Points      = 32768
X Prescans    = 4
X Resolution  = 0.95846665[Hz]
X Sweep       = 31.40703518[kHz]
X Sweep_Clipped = 25.12562814[kHz]
Irr_Domain    = Proton
Irr_Freq     = 399.78219838[MHz]
Irr_Offset    = 5[ppm]
Clipped       = FALSE
Scans         = 2300
Total_Scans   = 2300

Relaxation_Delay = 2[s]
Recvr Gain       = 50
Temp_Get         = 21[dC]
X 90_Width      = 9[us]
X Acq_Time      = 1.04333312[s]
X Angle         = 30[deg]
X Atn           = 4.7[dB]
X Pulse        = 3[us]
Irr_Atn_Dec     = 22.346[dB]
Irr_Atn_Noise  = 22.346[dB]
Irr_Noise      = WALTZ
Irr_Pwidth     = 0.115[ms]
Decoupling     = TRUE
Initial_Wait    = 1[s]
Noe             = TRUE
Noe Time       = 2[s]
Repetition Time = 3.04333312[s]

```



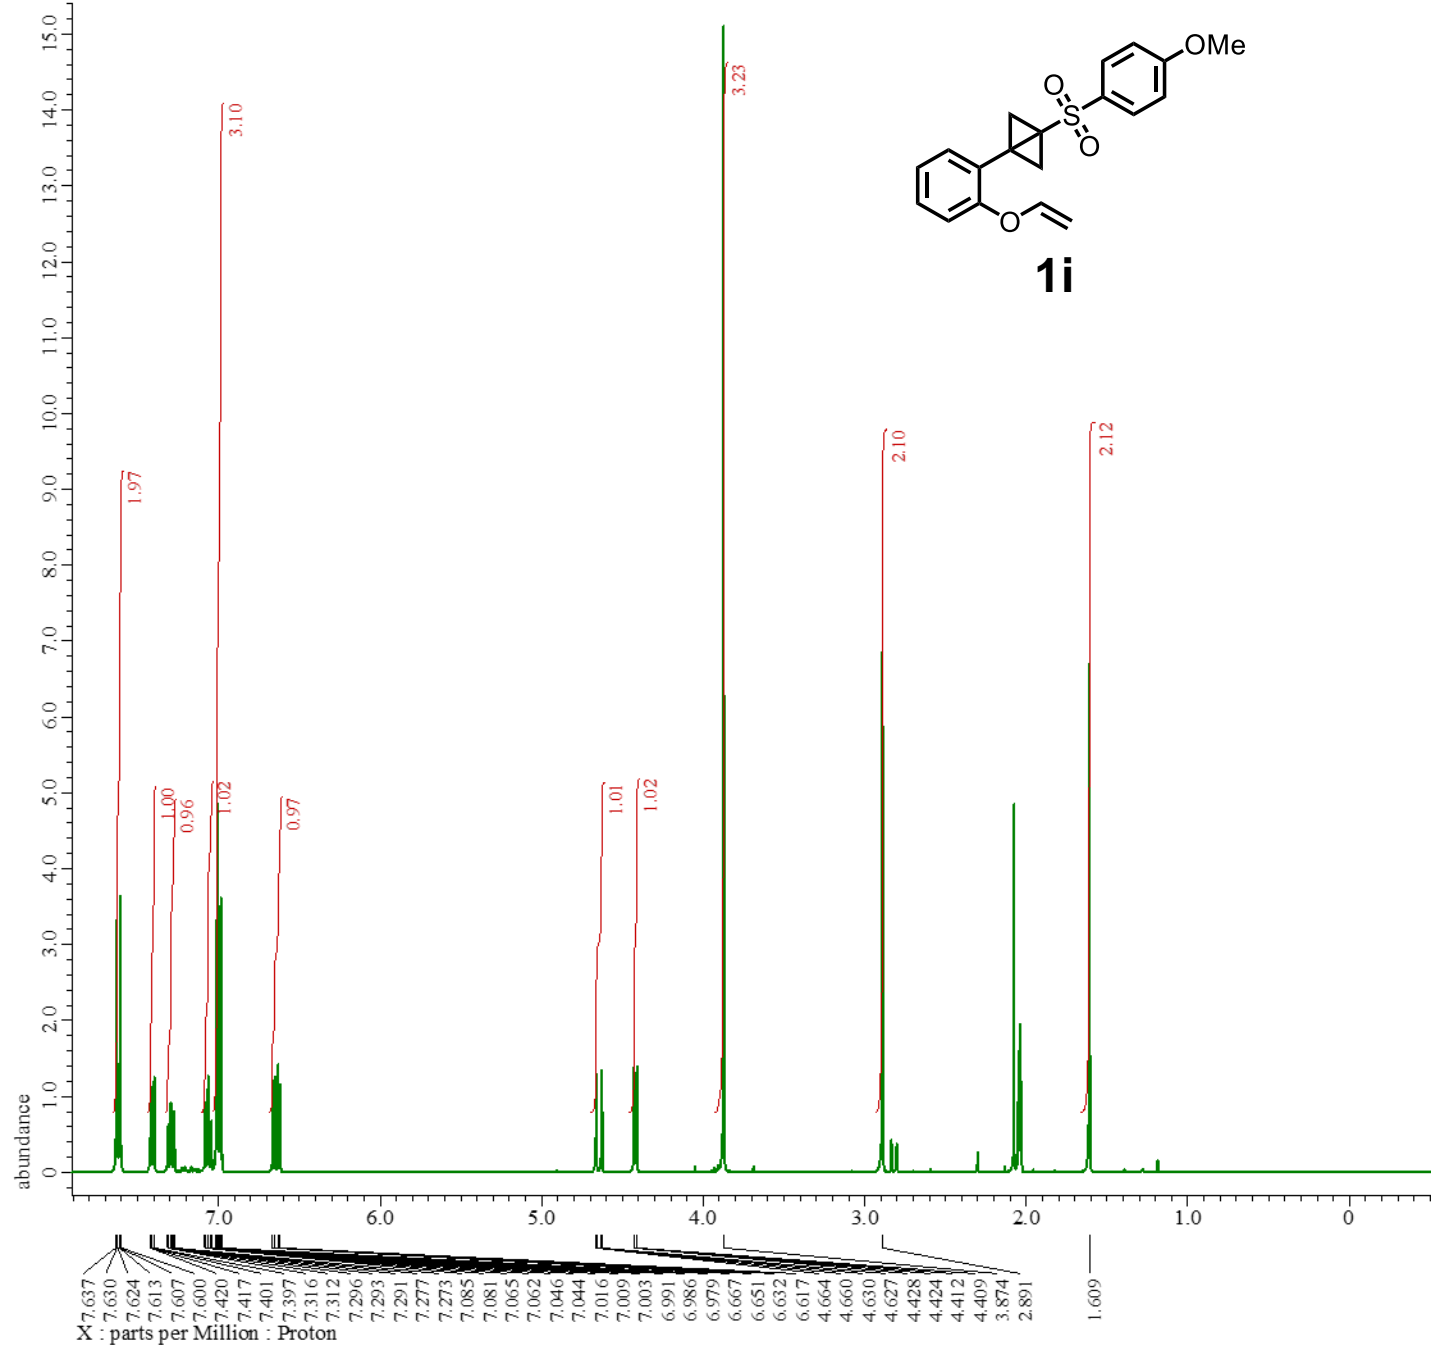

```

---- PROCESSING PARAMETERS ----
dc balance( 0, FALSE )
sexp( 0.2[Hz], 0.0[s] )
trapezoid( 0[8], 0[8], 80[8], 100[8] )
zerofill( 1, TRUE )
fft( 1, TRUE, TRUE )
machinephase
ppm

Filename      = 10_EWG_4-Ome_Acetone-d6_P
Author       = delta
Experiment   = proton.jxp
Sample Id    = 210662_column_Acetone-d6
Solvent      = ACETONE-D6
Actual Start Time = 19-DEC-2022 22:17:45
Revision Time   = 15-MAR-2023 21:12:17

Comment       = single pulse
Data Format    = 1D_COMPLEX
Dim Size      = 13107
X_Domain     = Proton
Dim Title     = Proton
Dim Units    = [ppm]
Dimensions   = X
Site         = ECS 400
Spectrometer = DELTA2_NMR

Field Strength = 9.389766[T] (400[MHz])
X_Acq_Duration = 2.18365952[s]
X_Domain       = 1H
X_Freq         = 399.78219838[MHz]
X_Offset       = 5[ppm]
X_Points       = 16384
X_Prescans     = 1
X_Resolution   = 0.45794685[Hz]
X_Sweep        = 7.5030012[kHz]
X_Sweep_Clippped = 6.00240096[kHz]
Irr_Domain     = Proton
Irr_Freq       = 399.78219838[MHz]
Irr_Offset     = 5[ppm]
Tri_Domain     = Proton
Tri_Freq       = 399.78219838[MHz]
Tri_Offset     = 5[ppm]
Clipped        = FALSE
Scans          = 8
Total_Scans    = 8

Relaxation_Delay = 5[s]
Recvr_Gain       = 38
Temp_Get         = 20.3[dc]
X_90_Width      = 12.4[us]
X_Acq_Time       = 2.18365952[s]
X_Angle         = 45[deg]
X_Atn           = 3[dB]
X_Pulse         = 6.2[us]
Irr_Mode        = Off
Tri_Mode        = Off
DanTe_Presat    = FALSE
Initial_Wait     = 1[s]
Repetition_Time = 7.18365952[s]

```

<sup>1</sup>H NMR spectrum of **1j** (400 MHz, Acetone-d<sub>6</sub>)

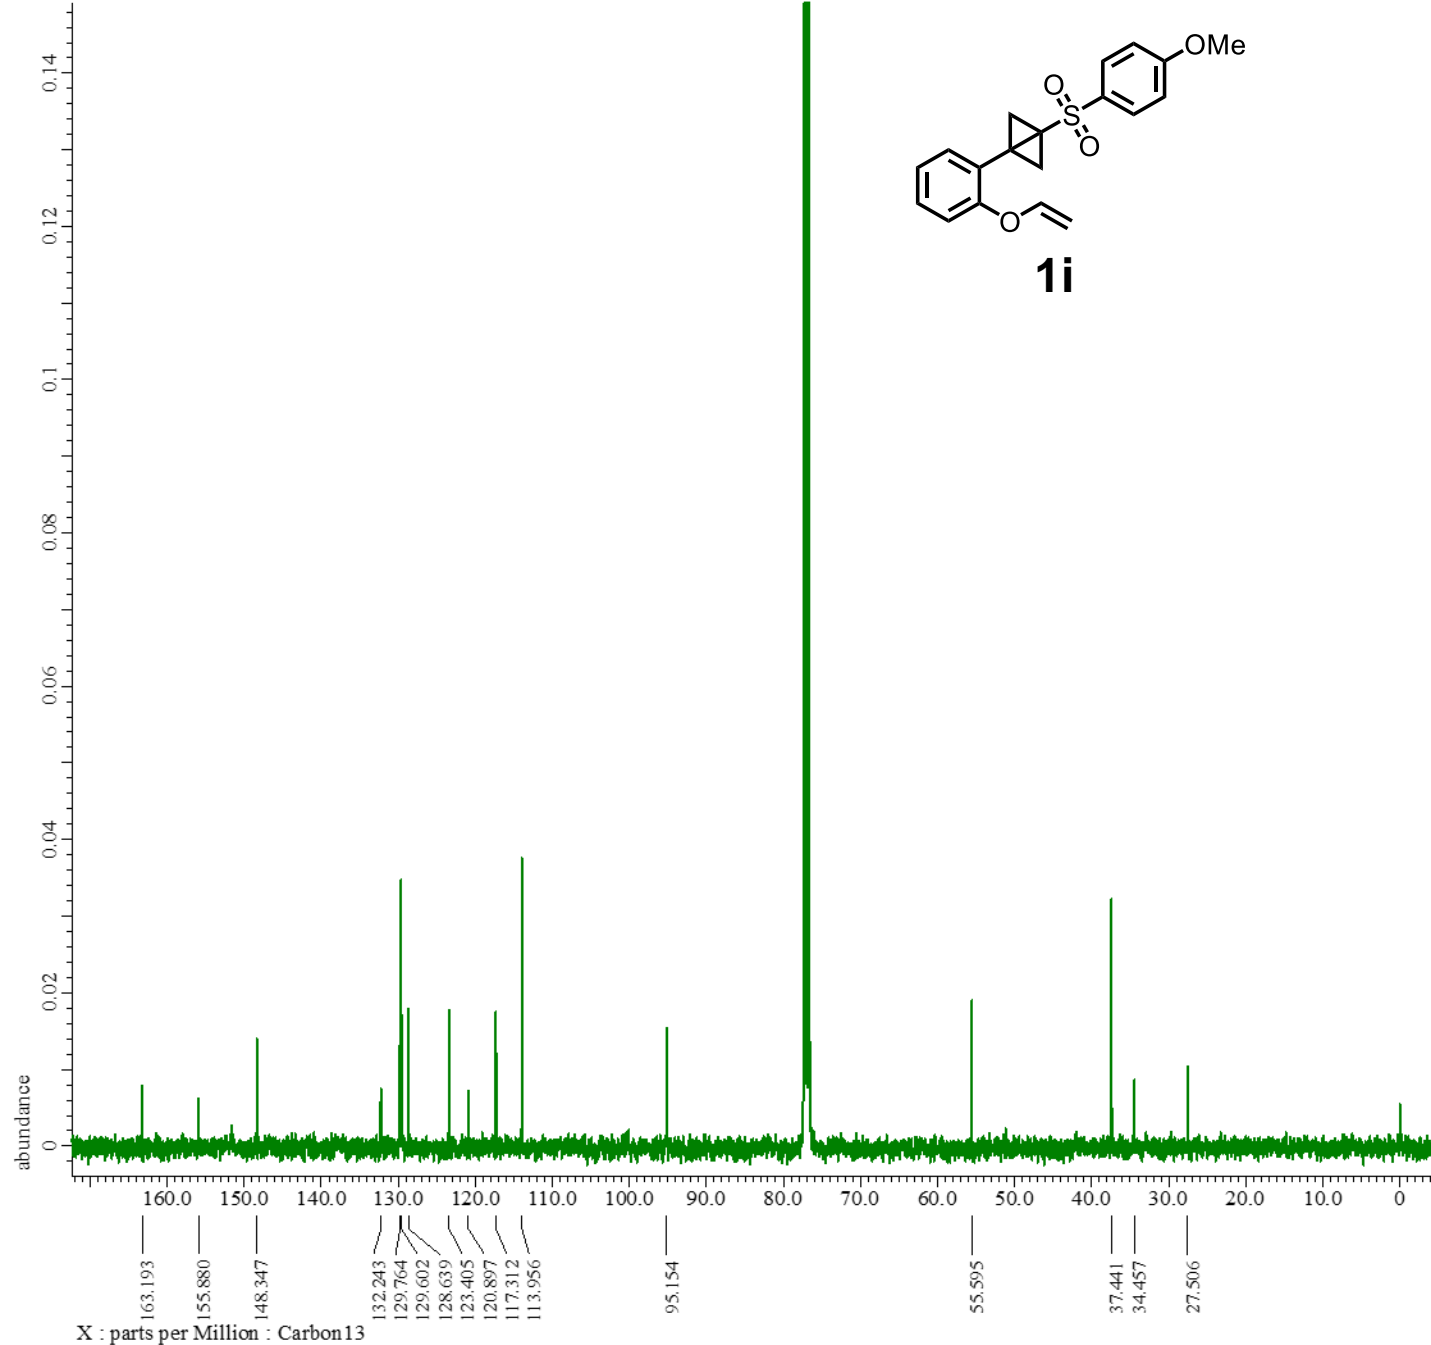

```

---- PROCESSING PARAMETERS ----
dc balance( 0, FALSE )
sexp( 2.0[Hz], 0.0[s] )
trapezoid( 0[8], 0[8], 80[8], 100[8] )
zerofill( 1, TRUE )
fft( 1, TRUE, TRUE )
machinephase
ppm

Filename           = 10_EWG_4-MeOPh_CDC13_Carb
Author              = delta
Experiment          = carbon.jxp
Sample Id           = 210545_column 2_CDC13
Solvent             = CHLOROFORM-D
Actual Start Time   = 23-SEP-2022 19:27:57
Revision Time       = 4-JAN-2023 21:31:29

Comment            = single pulse decoupled ga
Data Format         = 1D_COMPLEX
Dim Size           = 26214
X_Domain           = Carbon
Dim Title          = Carbon13
Dim Units          = [ppm]
Dimensions         = X
Site               = ECS 400
Spectrometer       = DELTA2_NMR

Field Strength     = 9.389766[T] (400[MHz])
X_Acq_Duration     = 1.04333312[s]
X_Domain           = 13C
X_Freq             = 100.52530333[MHz]
X_Offset           = 100[ppm]
X Points           = 32768
X_Prescans         = 4
X_Resolution       = 0.95846665[Hz]
X_Sweep            = 31.40703518[kHz]
X_Sweep_Clippped   = 25.12562814[kHz]
Irr_Domain         = Proton
Irr_Freq           = 399.78219838[MHz]
Irr_Offset         = 5[ppm]
Clipped            = FALSE
Scans              = 1024
Total_Scans        = 1024

Relaxation_Delay   = 2[s]
Recvr Gain         = 50
Temp_Get           = 20.4[dC]
X_90_Width         = 9[us]
X_Acq_Time         = 1.04333312[s]
X_Angle            = 30[deg]
X_Atn              = 4.7[dB]
X_Pulse            = 3[us]
Irr_Atn_Dec        = 22.346[dB]
Irr_Atn_Noise     = 22.346[dB]
Irr_Noise          = WALTZ
Irr_Pwidth         = 0.115[ms]
Decoupling         = TRUE
Initial_Wait       = 1[s]
Noe                = TRUE
Noe_Time           = 2[s]
Repetition Time    = 3.04333312[s]

```

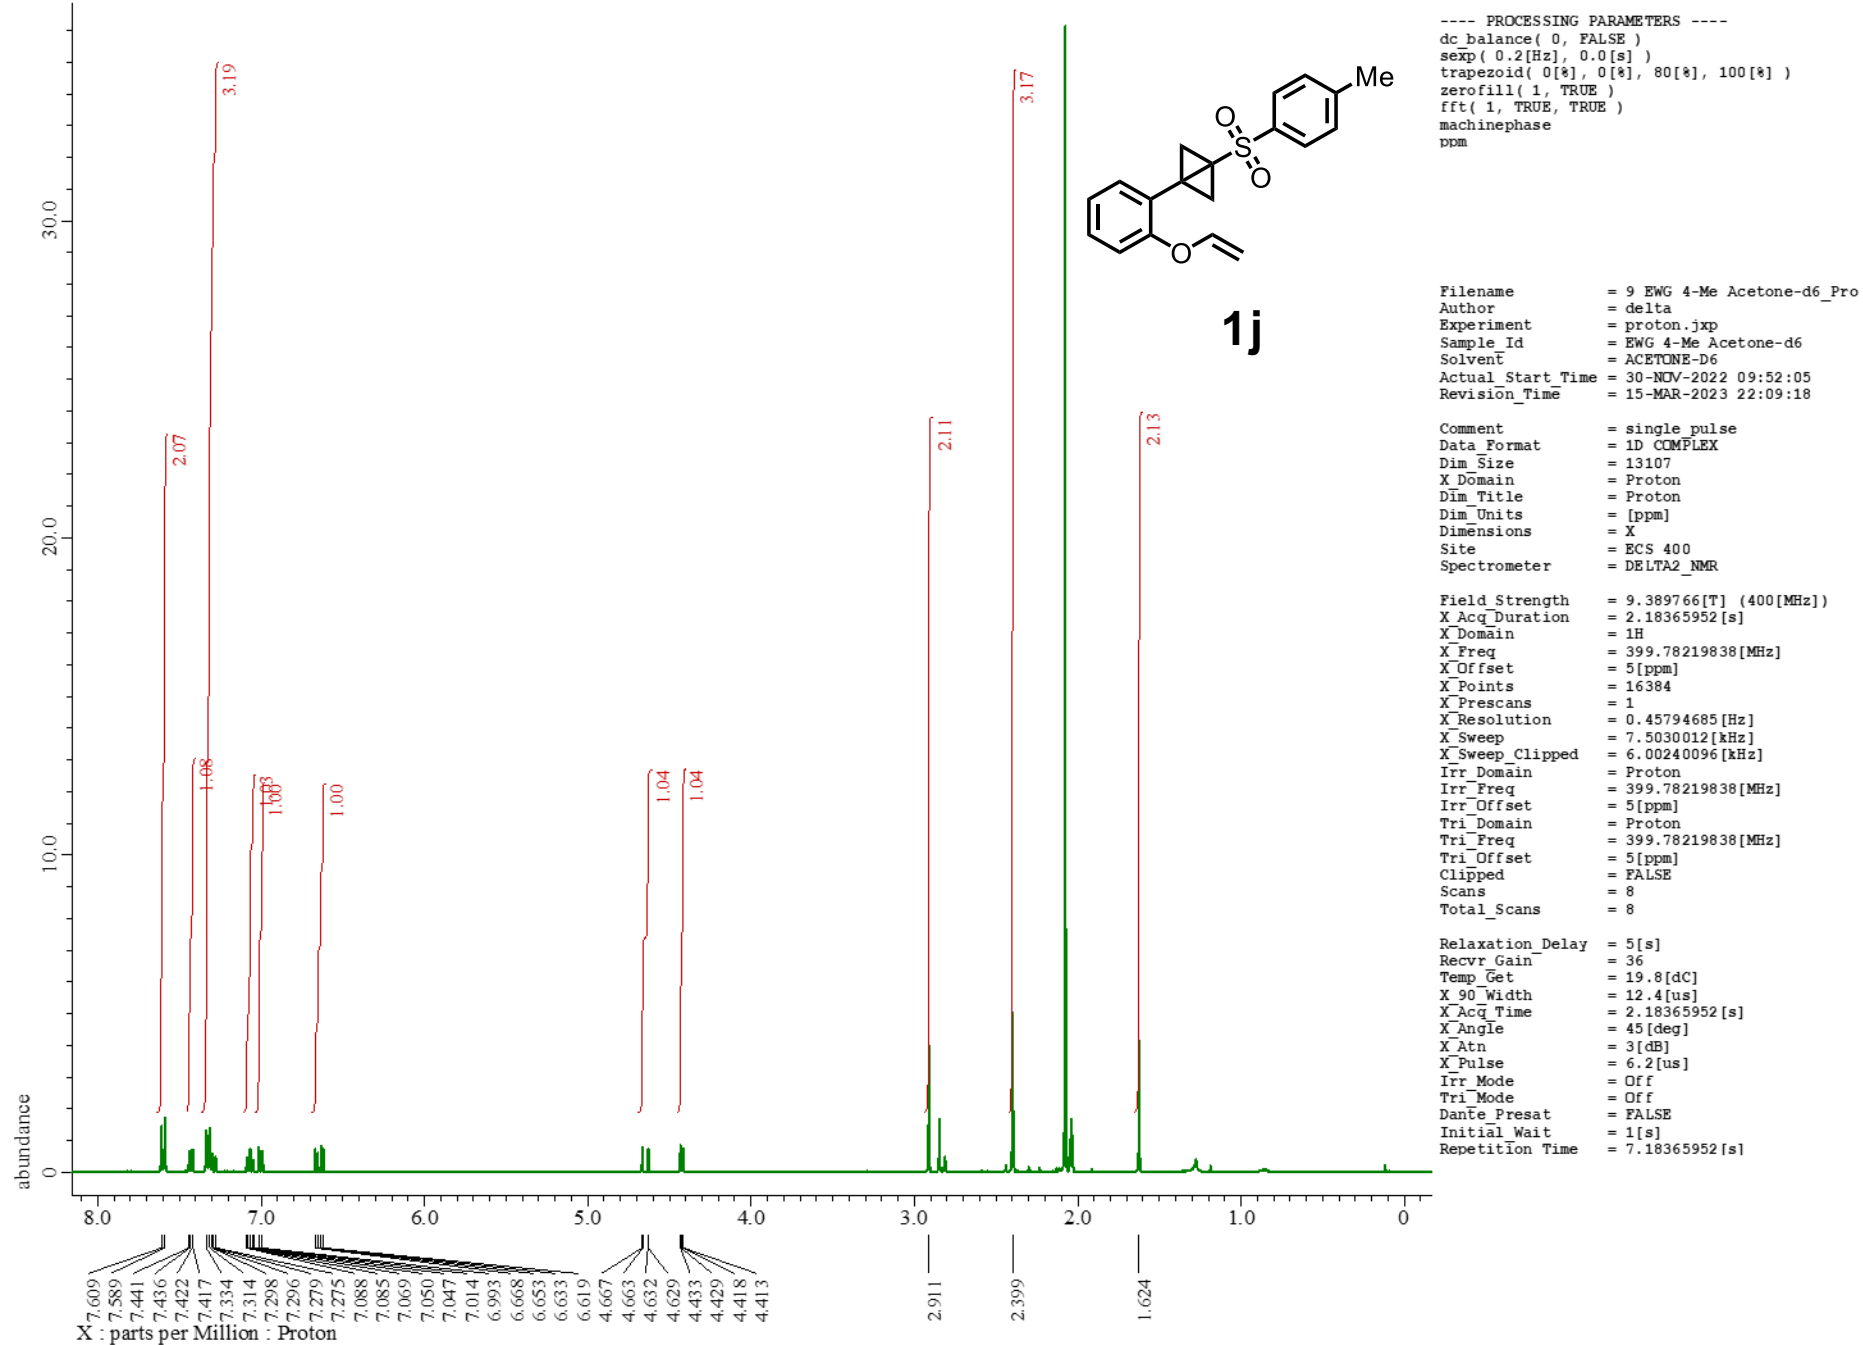

<sup>1</sup>H NMR spectrum of **1g** (400 MHz, Acetone-*d*<sub>6</sub>)

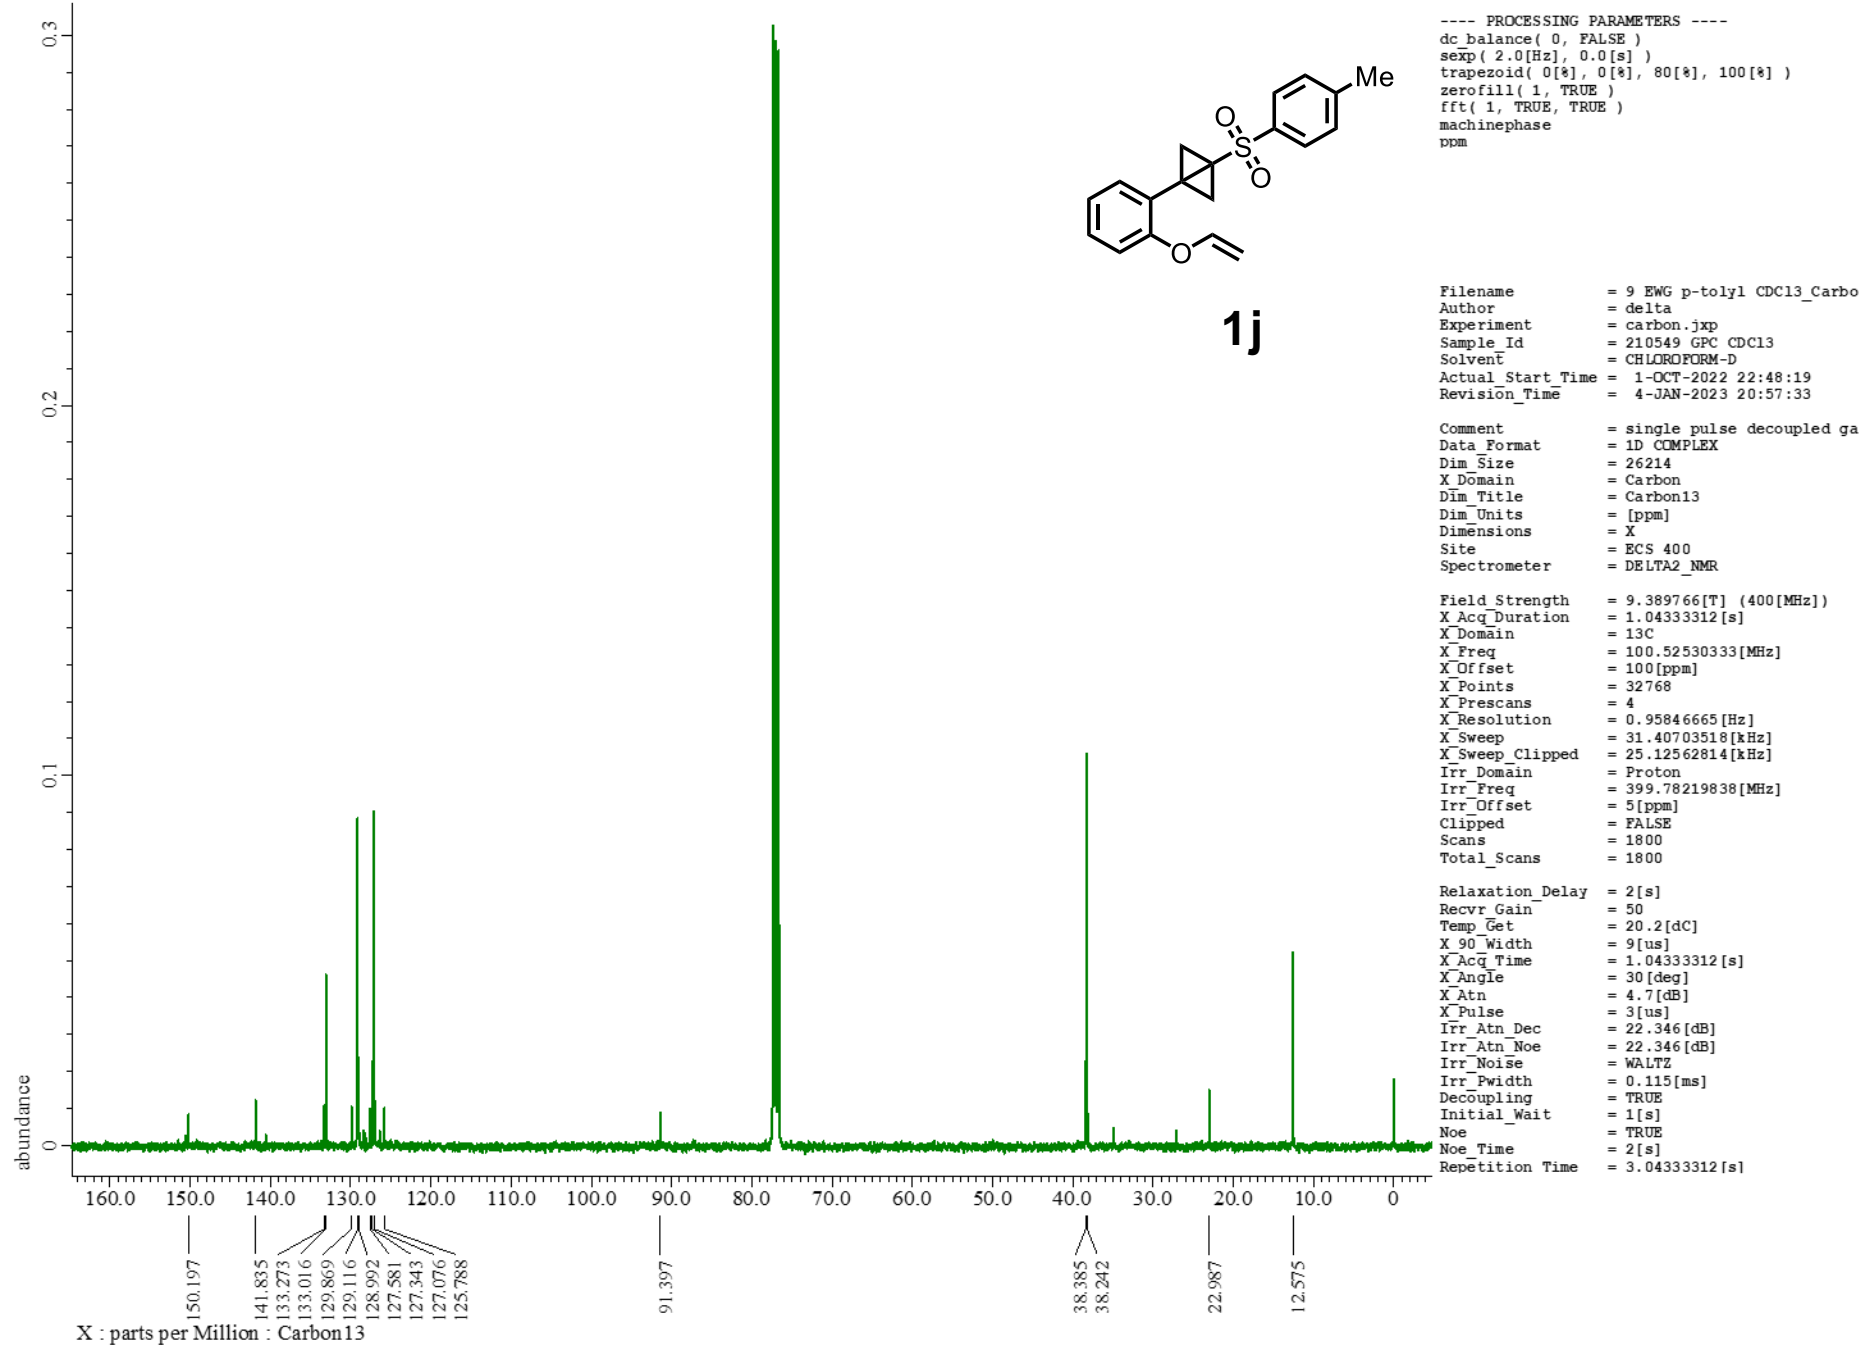

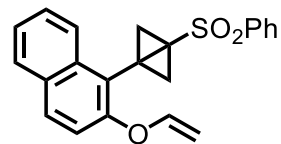

**1k**

```

---- PROCESSING PARAMETERS ----
dc balance( 0, FALSE )
sexp( 0.2[Hz], 0.0[s] )
trapezoid( 0[8], 0[8], 80[8], 100[8] )
zerofill( 1, TRUE )
fft( 1, TRUE, TRUE )
machinephase
ppm

```

```

Filename      = 34_1,2-naph Acetone-d6_Pr
Author        = delta
Experiment    = proton.jxp
Sample Id     = 210684 check Acetone-d6
Solvent       = ACETONE-D6
Actual Start Time = 16-MAR-2023 15:47:21
Revision Time  = 17-MAR-2023 10:16:21

```

```

Comment       = single pulse
Data Format    = 1D COMPLEX
Dim Size      = 13107
X_Domain      = Proton
Dim Title     = Proton
Dim Units     = [ppm]
Dimensions    = X
Site          = ECS 300
Spectrometer  = DELTA2_NMR

Field Strength = 7.0586013[T] (300 [MHz])
X_Acq_Duration = 2.90717696 [s]
X_Domain       = 1H
X_Freq         = 300.52965592 [MHz]
X_Offset       = 5 [ppm]
X Points       = 16384
X_Prescans     = 1
X_Resolution   = 0.34397631 [Hz]
X_Sweep        = 5.63570784 [kHz]
X_Sweep_Clippped = 4.50856628 [kHz]
Irr_Domain     = Proton
Irr_Freq       = 300.52965592 [MHz]
Irr_Offset     = 5 [ppm]
Tri_Domain     = Proton
Tri_Freq       = 300.52965592 [MHz]
Tri_Offset     = 5 [ppm]
Clipped        = FALSE
Scans          = 8
Total_Scans    = 8

```

```

Relaxation Delay = 5 [s]
Recvr Gain       = 44
Temp_Get         = 20 [dC]
X_90_Width       = 11 [us]
X_Acq_Time       = 2.90717696 [s]
X_Angle          = 45 [deg]
X_Atn            = 1 [dB]
X_Pulse          = 5.5 [us]
Irr_Mode         = Off
Tri_Mode         = Off
DanTe_Presat    = FALSE
Initial Wait     = 1 [s]
Repetition Time  = 7.90717696 [s]

```

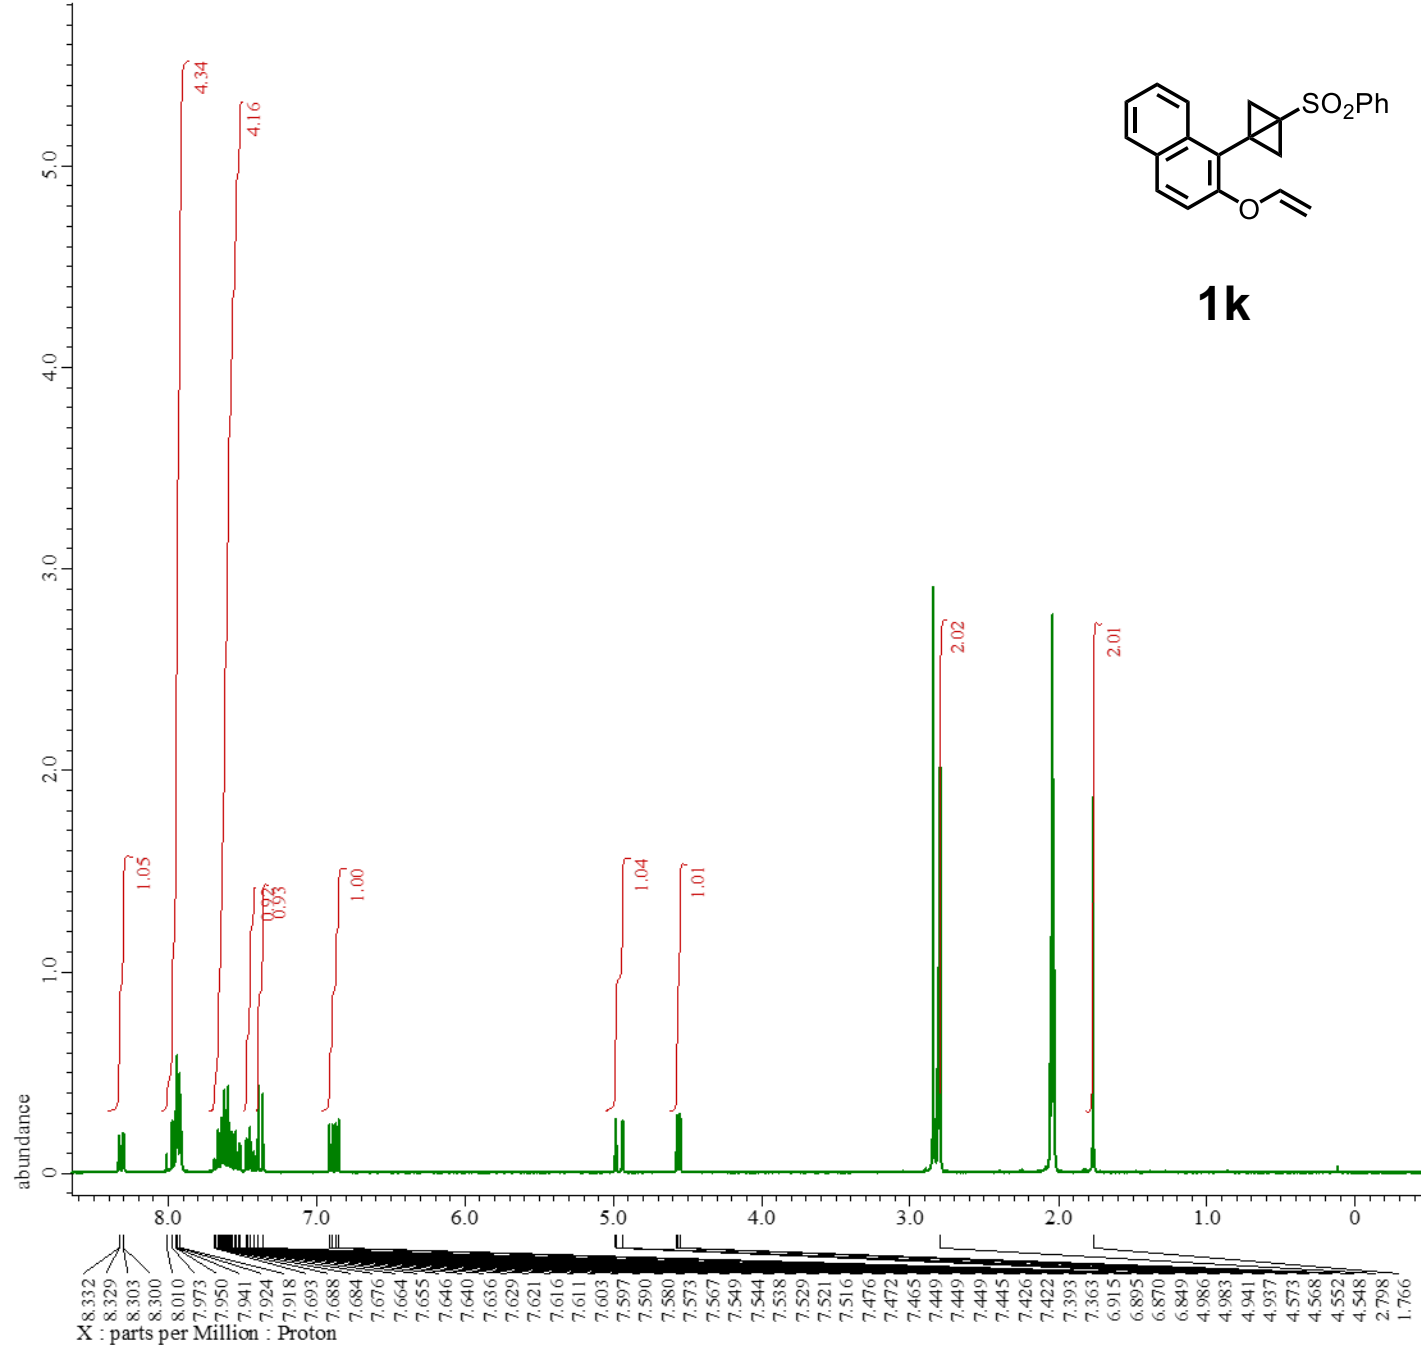

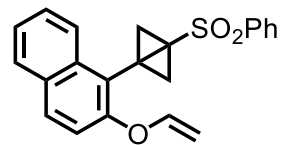

1k

```

---- PROCESSING PARAMETERS ----
dc balance( 0, FALSE )
sexp( 2.0[Hz], 0.0[s] )
trapezoid( 0[°], 0[°], 80[°], 100[°] )
zerofill( 1, TRUE )
fft( 1, TRUE, TRUE )
machinephase
ppm

```

```

Filename      = 210684 check2 Acetone-d6_
Author       = delta
Experiment   = carbon.jxp
Sample Id    = 210684 check2 Acetone-d6
Solvent      = ACETONE-D6
Actual Start Time = 17-MAR-2023 10:01:08
Revision Time = 17-MAR-2023 11:47:17

```

```

Comment      = single pulse decoupled ga
Data Format   = 1D COMPLEX
Dim Size     = 26214
X_Domain     = Carbon
Dim Title    = Carbon13
Dim Units    = [ppm]
Dimensions   = X
Site         = ECS 300
Spectrometer = DELTA2_NMR

```

```

Field Strength = 7.0586013[T] (300 [MHz])
X Acq Duration = 1.38412032 [s]
X Domain       = 13C
X Freq        = 75.56823426 [MHz]
X Offset      = 100 [ppm]
X Points      = 32768
X Prescans    = 4
X Resolution   = 0.72248054 [Hz]
X Sweep       = 23.67424242 [kHz]
X Sweep Clipped = 18.93939394 [kHz]
Irr Domain    = Proton
Irr Freq      = 300.52965592 [MHz]
Irr Offset    = 5 [ppm]
Clipped       = FALSE
Scans         = 2501
Total Scans   = 2501

```

```

Relaxation Delay = 1 [s]
Recvr Gain       = 50
Temp Get         = 20.1 [dC]
X 90 Width      = 11.4 [us]
X Acq Time      = 1.38412032 [s]
X Angle         = 30 [deg]
X Atn           = 5.4 [dB]
X Pulse         = 3.8 [us]
Irr Atn Dec     = 21.6 [dB]
Irr Noise       = WALTZ
Irr Pwidth      = 0.118 [ms]
Decoupling      = TRUE
Initial Wait    = 1 [s]
Noe              = FALSE
Repetition Time = 2.38412032 [s]

```

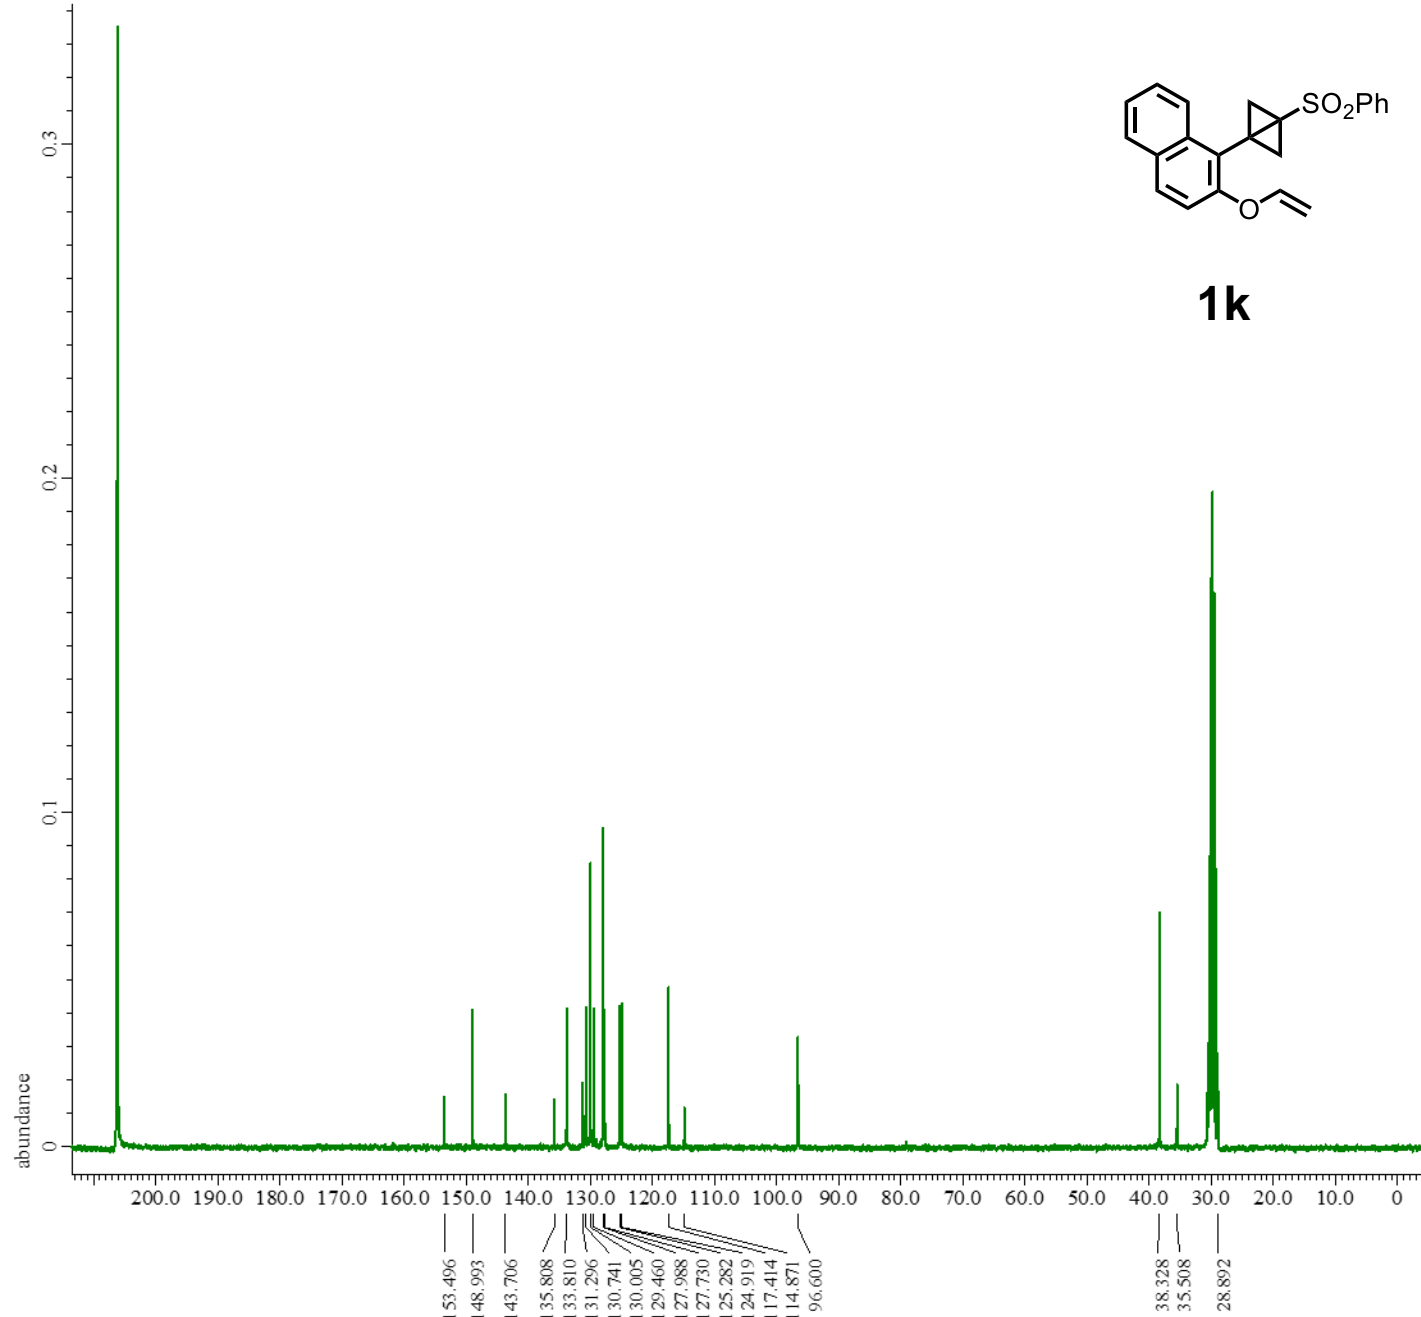

X : parts per Million : Carbon13

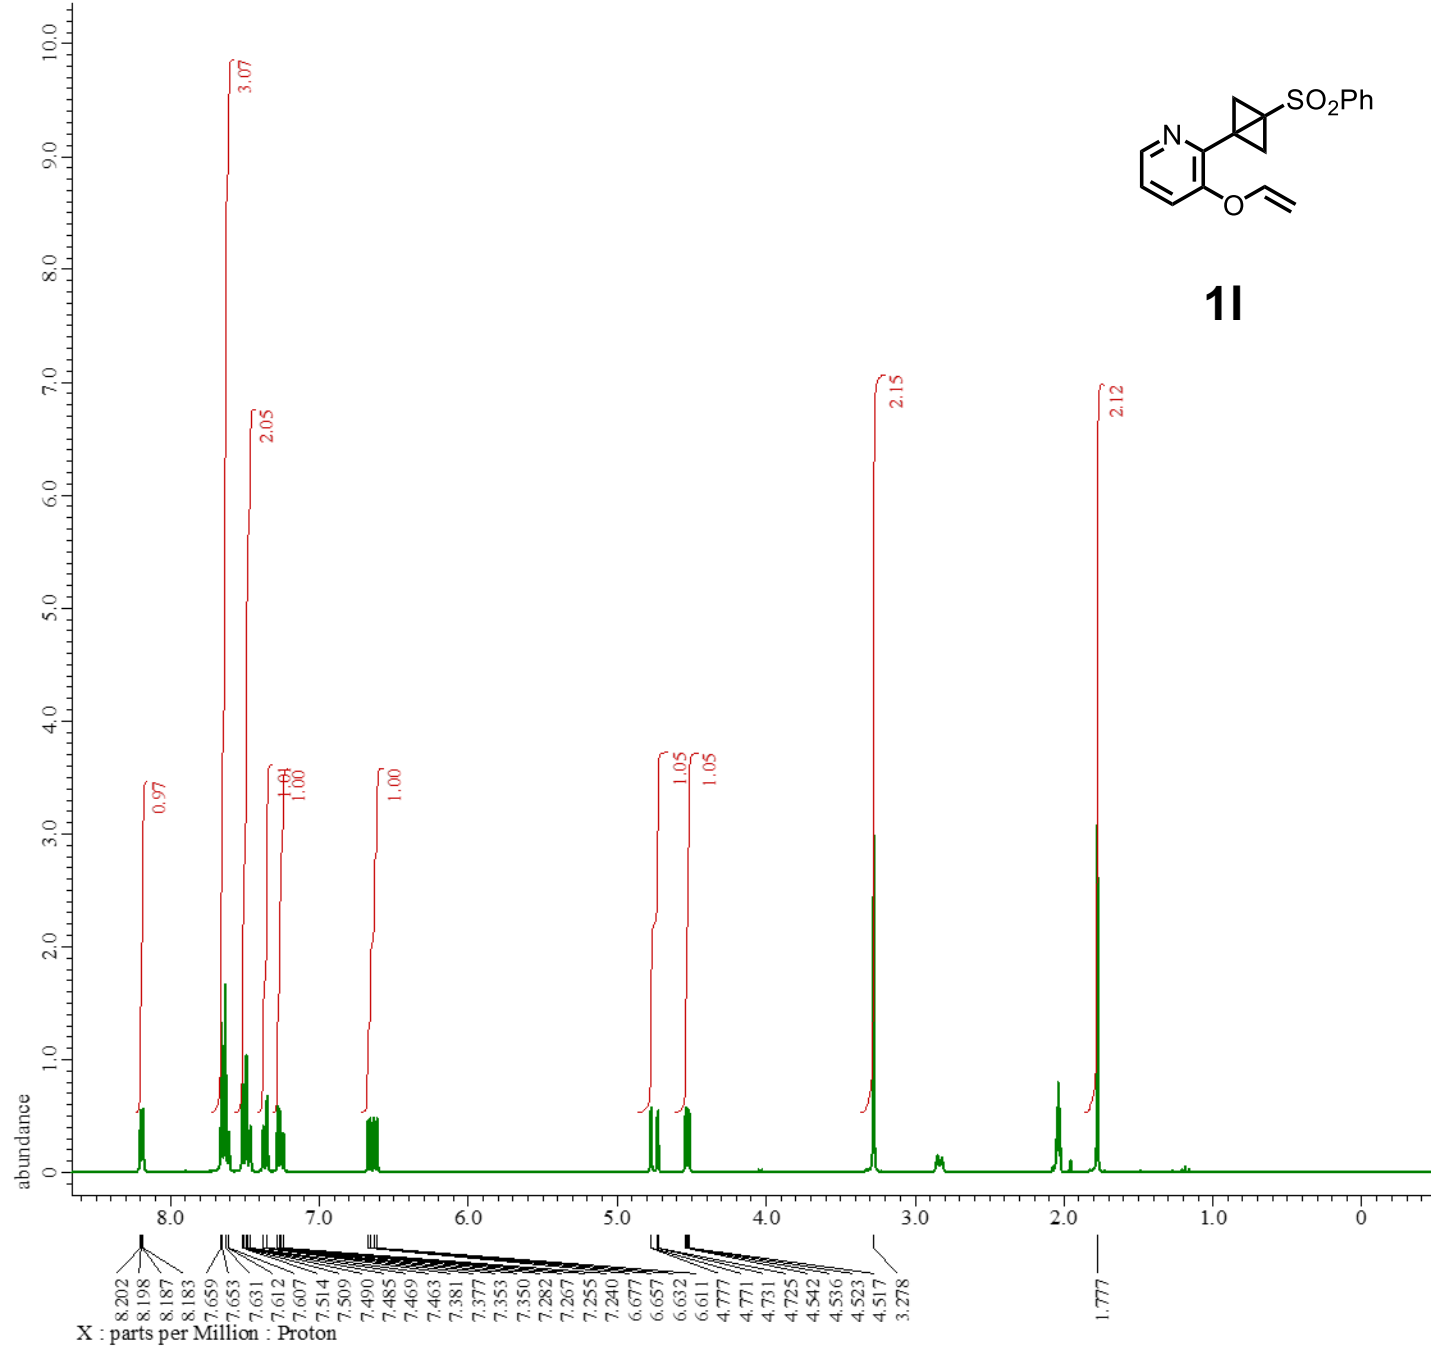

```

---- PROCESSING PARAMETERS ----
dc balance( 0, FALSE )
sexp( 0.2[Hz], 0.0[s] )
trapezoid( 0[8], 0[8], 80[8], 100[8] )
zerofill( 1, TRUE )
fft( 1, TRUE, TRUE )
machinephase
ppm

Filename      = 33 pyridine Acetone-d6_Pr
Author        = delta
Experiment    = proton.jxp
Sample Id     = pyridine sub check Aceton
Solvent       = ACETONE-D6
Actual Start Time = 19-JAN-2023 18:23:39
Revision Time  = 15-MAR-2023 22:34:02

Comment       = single pulse
Data Format    = 1D COMPLEX
Dim Size      = 13107
X_Domain      = Proton
Dim Title     = Proton
Dim Units     = [ppm]
Dimensions    = X
Site          = ECS 300
Spectrometer  = DELTA2_NMR

Field Strength = 7.0586013[T] (300 [MHz])
X_Acq_Duration = 2.90717696[s]
X_Domain       = 1H
X_Freq         = 300.52965592[MHz]
X_Offset       = 5[ppm]
X_Points       = 16384
X_Prescans     = 1
X_Resolution   = 0.34397631 [Hz]
X_Sweep        = 5.63570784 [kHz]
X_Sweep_Clippped = 4.50856628 [kHz]
Irr_Domain     = Proton
Irr_Freq       = 300.52965592[MHz]
Irr_Offset     = 5[ppm]
Tri_Domain     = Proton
Tri_Freq       = 300.52965592[MHz]
Tri_Offset     = 5[ppm]
Clipped        = FALSE
Scans          = 8
Total_Scans    = 8

Relaxation_Delay = 5[s]
Recvr_Gain       = 38
Temp_Get         = 19.7[dC]
X_90_Width       = 11[us]
X_Acq_Time       = 2.90717696[s]
X_Angle          = 45[deg]
X_Atn            = 1[dB]
X_Pulse          = 5.5[us]
Irr_Mode         = Off
Tri_Mode         = Off
DanTe_Presat    = FALSE
Initial_Wait     = 1[s]
Repetition_Time  = 7.90717696[is]

```

<sup>1</sup>H NMR spectrum of **11** (301 MHz, Acetone-d<sub>6</sub>)

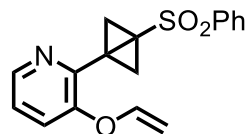

11

```

---- PROCESSING PARAMETERS ----
dc balance( 0, FALSE )
sexp( 2.0[Hz], 0.0[s] )
trapezoid( 0[8], 0[8], 80[8], 100[8] )
zerofill( 1, TRUE )
fft( 1, TRUE, TRUE )
machinephase
ppm

```

```

Filename      = 33 pyridine CDC13_Carbon-
Author       = delta
Experiment   = carbon.jxp
Sample Id    = pyridine sub check CDC13
Solvent      = CHLOROFORM-D
Actual Start Time = 25-JAN-2023 11:59:51
Revision Time   = 29-JAN-2023 18:55:44

```

```

Comment      = single pulse decoupled ga
Data Format   = 1D COMPLEX
Dim Size     = 26214
X_Domain     = Carbon
Dim Title    = Carbon13
Dim Units    = [ppm]
Dimensions   = X
Site         = ECS 400
Spectrometer = DELTA2_NMR

```

```

Field Strength = 9.389766[T] (400[MHz])
X_Acq_Duration = 1.04333312[s]
X_Domain       = 13C
X_Freq         = 100.52530333[MHz]
X_Offset       = 100[ppm]
X Points       = 32768
X_Prescans     = 4
X_Resolution   = 0.95846665[Hz]
X_Sweep        = 31.40703518[kHz]
X_Sweep_Clippped = 25.12562814[kHz]
Irr_Domain     = Proton
Irr_Freq       = 399.78219838[MHz]
Irr_Offset     = 5[ppm]
Clipped        = FALSE
Scans          = 1024
Total_Scans    = 1024

```

```

Relaxation Delay = 2[s]
Recvr Gain       = 50
Temp_Get         = 19.9[dC]
X_90_Width      = 9[us]
X_Acq_Time       = 1.04333312[s]
X_Angle          = 30[deg]
X_Atn            = 4.7[dB]
X_Pulse          = 3[us]
Irr_Atn_Dec      = 22.346[dB]
Irr_Atn_Noec    = 22.346[dB]
Irr_Noise        = WALTZ
Irr_Pwidth       = 0.115[ms]
Decoupling       = TRUE
Initial_Wait     = 1[s]
Noe               = TRUE
Noe Time         = 2[s]
Repetition Time  = 3.04333312[s]

```

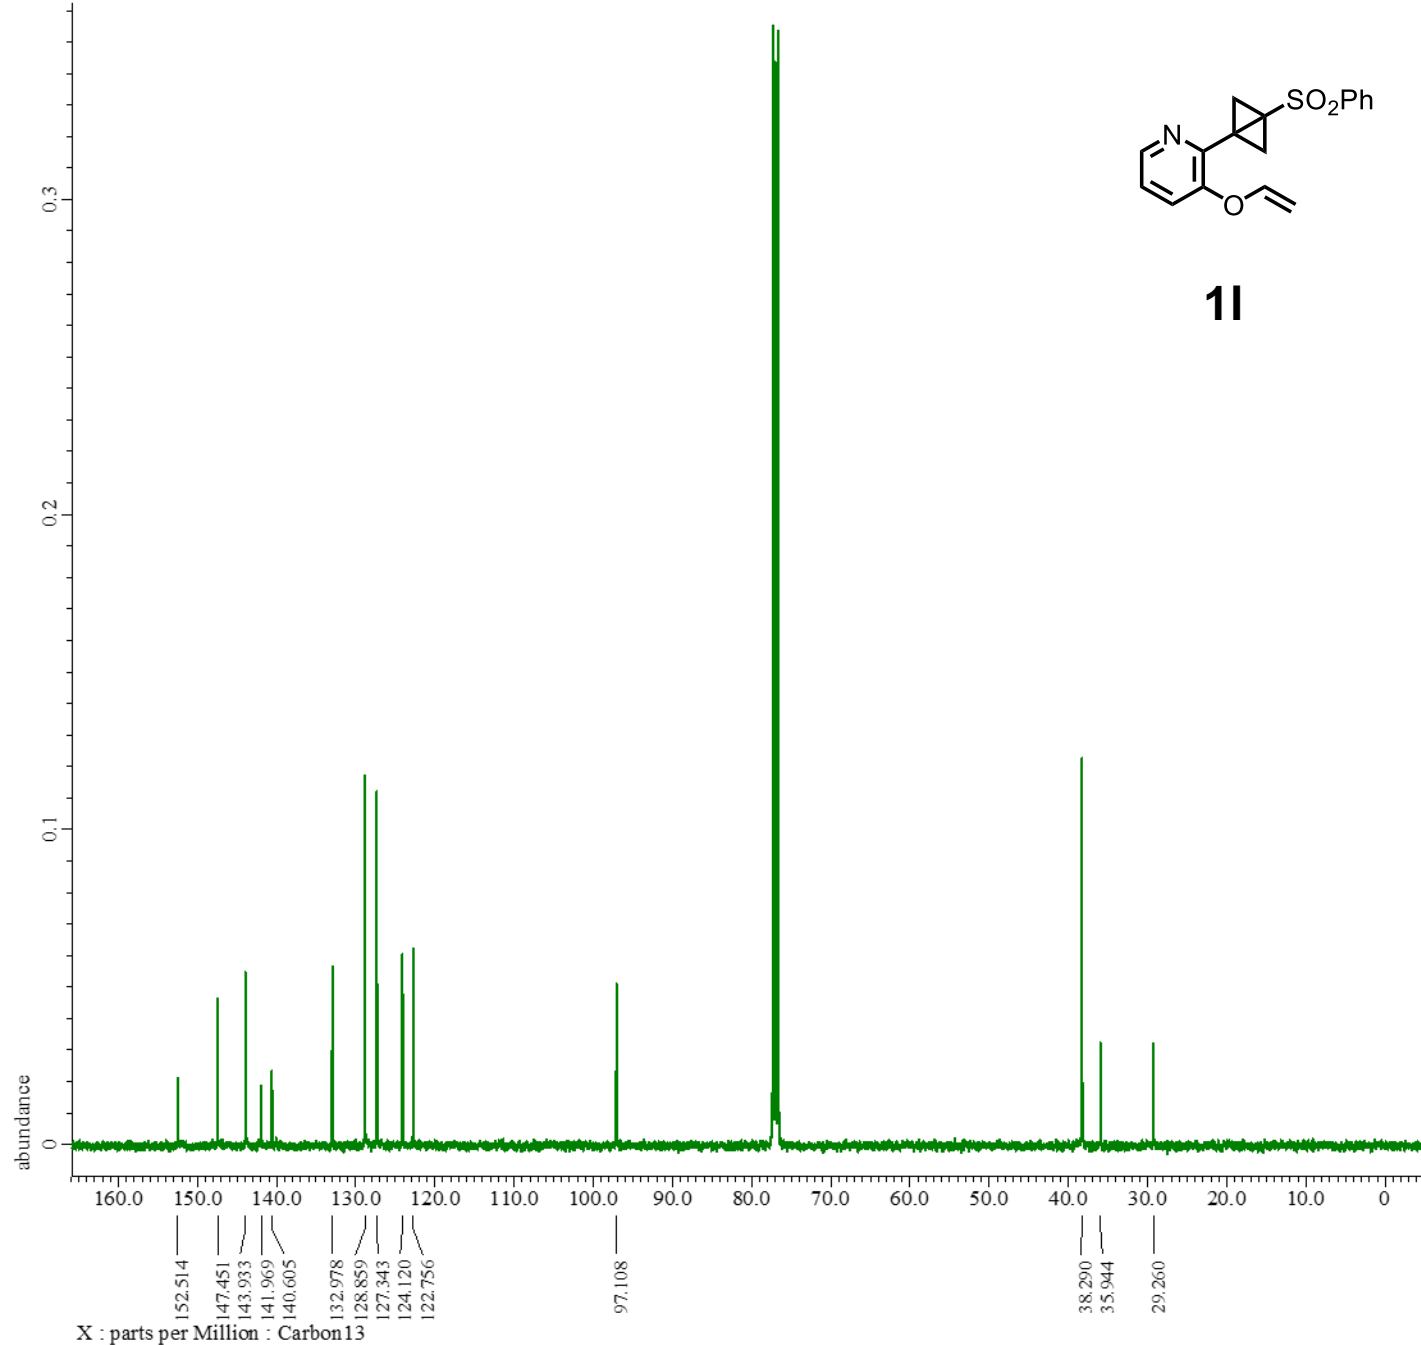



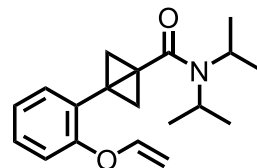

**1m**

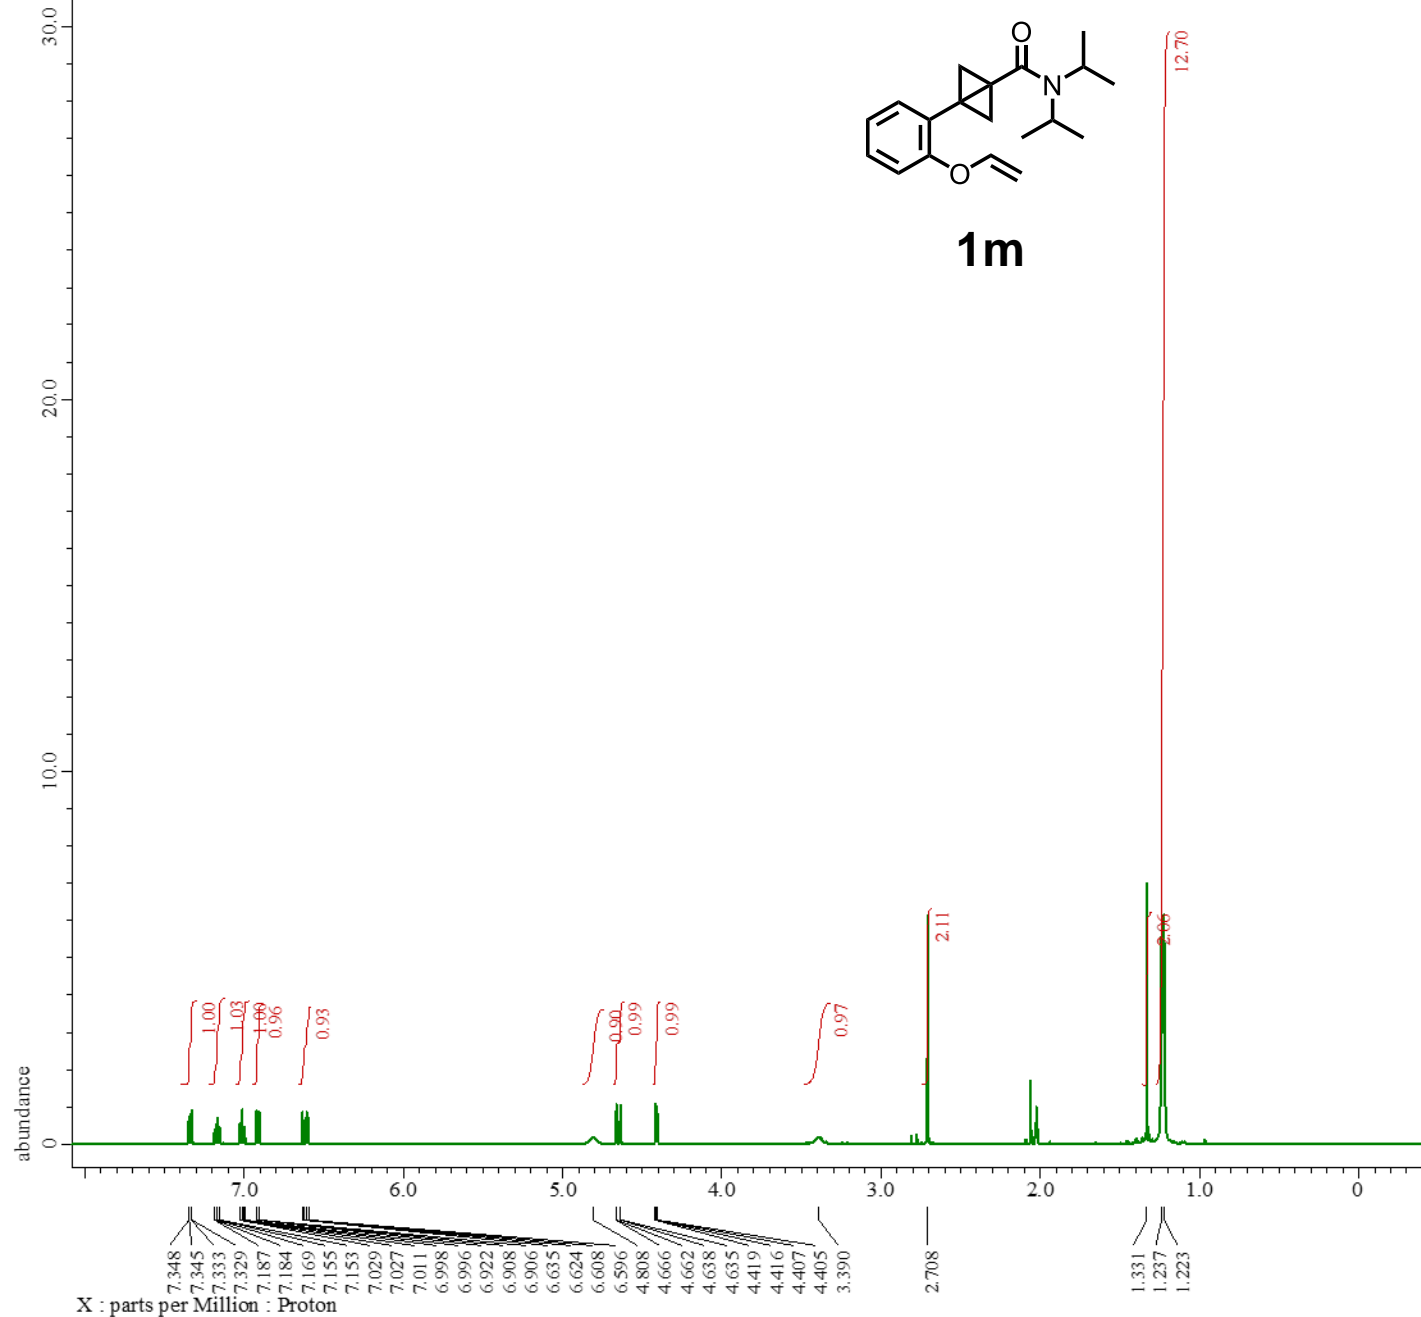

```

---- PROCESSING PARAMETERS ----
dc balance( 0, FALSE )
sexp( 0.2[Hz], 0.0[s] )
trapezoid( 0[8], 0[8], 80[8], 100[8] )
zerofill( 1, TRUE )
fft( 1, TRUE, TRUE )
machinephase
ppm

```

```

Filename      = 35 amido sub Acetone-d6_P
Author       = delta
Experiment    = proton.jxp
Sample Id     = amido sub column Acetone-
Solvent      = ACETONE-D6
Actual Start Time = 23-JAN-2023 13:13:15
Revision Time = 29-JAN-2023 19:45:52

```

```

Comment       = single pulse
Data Format    = 1D COMPLEX
Dim Size      = 13107
X_Domain     = Proton
Dim Title     = Proton
Dim Units     = [ppm]
Dimensions    = X
Site         = JNM-ECA500
Spectrometer  = DELTA2_NMR

```

```

Field Strength = 11.7473579 [T] (500 [MHz])
X Acq_Duration = 1.74587904 [s]
X_Domain      = 1H
X_Freq        = 500.15991521 [MHz]
X_Offset      = 5.0 [ppm]
X Points      = 16384
X_Prescans    = 1
X_Resolution  = 0.57277737 [Hz]
X_Sweep       = 9.38438438 [kHz]
X_Sweep_Clipped = 7.50750751 [kHz]
Irr_Domain    = Proton
Irr_Freq      = 500.15991521 [MHz]
Irr_Offset    = 5.0 [ppm]
Tri_Domain    = Proton
Tri_Freq      = 500.15991521 [MHz]
Tri_Offset    = 5.0 [ppm]
Clipped       = FALSE
Scans         = 8
Total_Scans   = 8

```

```

Relaxation Delay = 5 [s]
Recvr Gain       = 32
Temp_Get        = 19.8 [dC]
X_90_Width      = 12.9 [us]
X_Acq_Time      = 1.74587904 [s]
X_Angle         = 45 [deg]
X_Atn           = 3.6 [dB]
X_Pulse         = 6.45 [us]
Irr_Mode        = Off
Tri_Mode        = Off
DanTe_Presat    = FALSE
Initial Wait    = 1 [s]
Repetition Time = 6.74587904 [s]

```

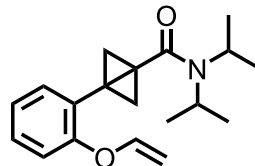

**1m**

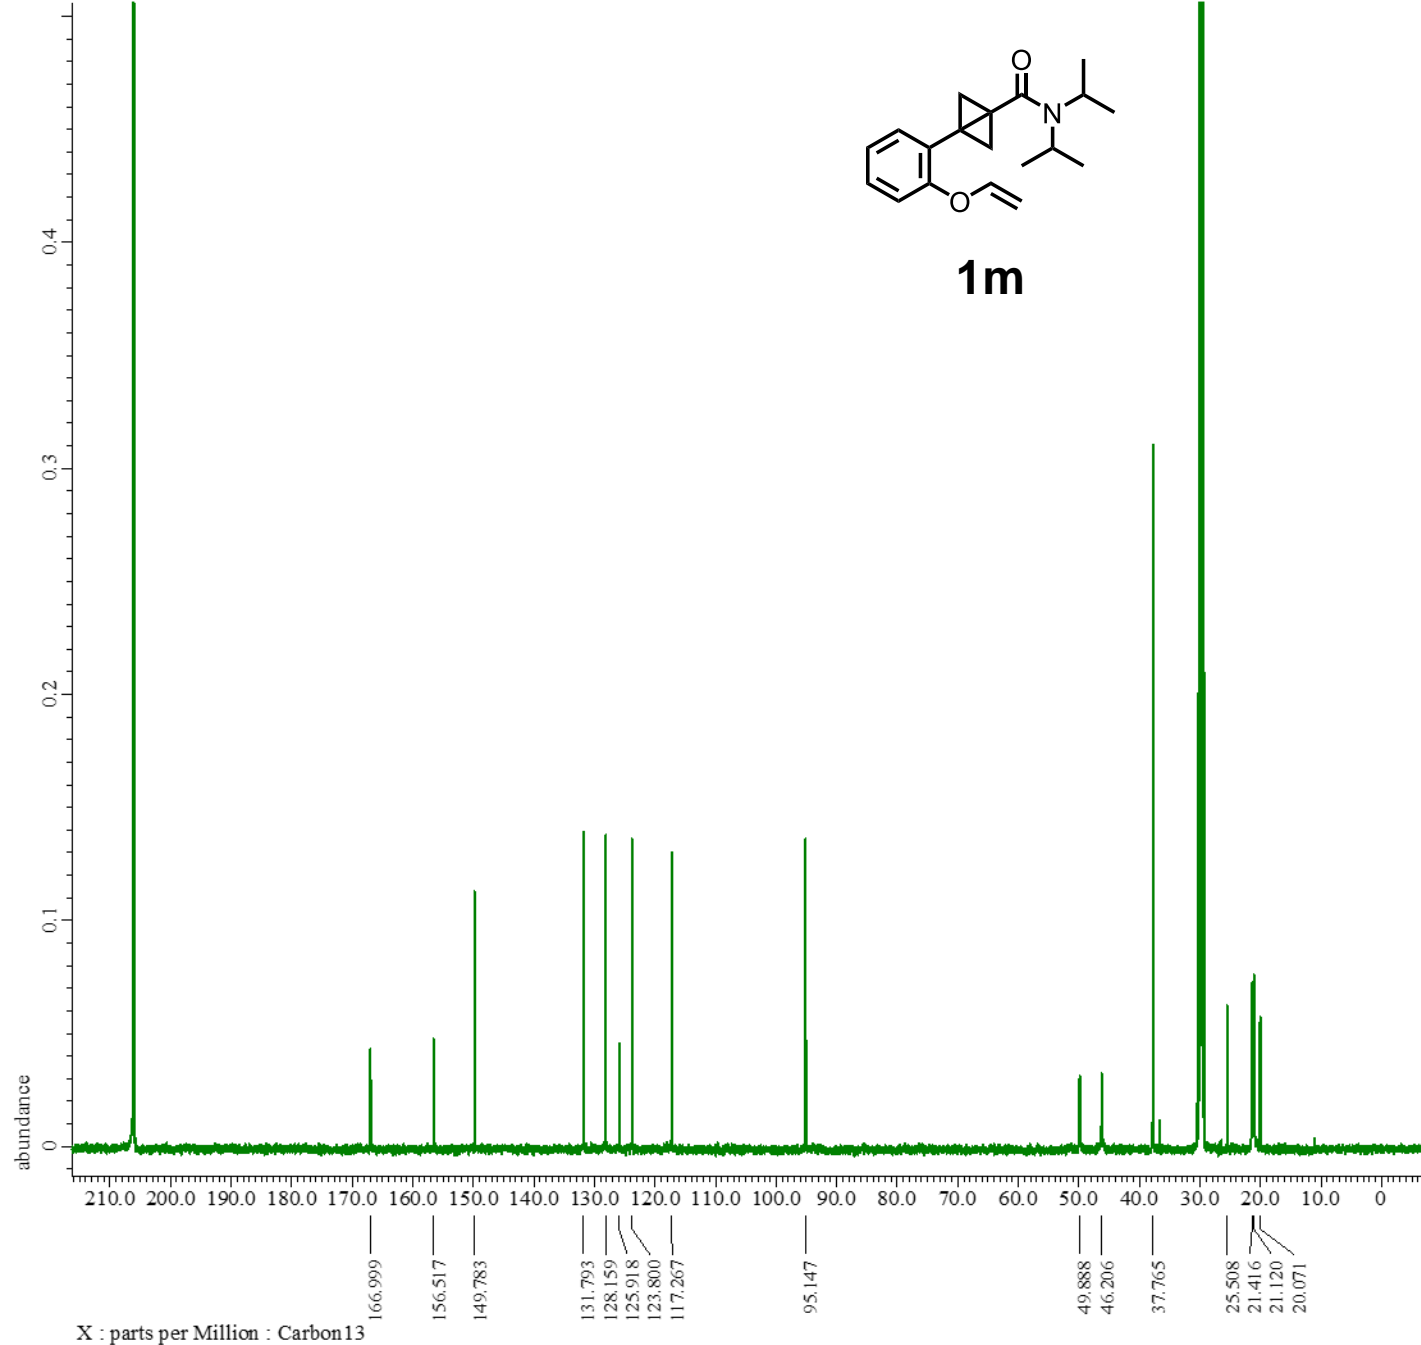

```

---- PROCESSING PARAMETERS ----
dc balance( 0, FALSE )
sexp( 2.0[Hz], 0.0[s] )
trapezoid( 0[8], 0[8], 80[8], 100[8] )
zerofill( 1, TRUE )
fft( 1, TRUE, TRUE )
machinephase
ppm

Filename      = 35 amido sub Acetone-d6_C
Author       = delta
Experiment   = carbon.jxp
Sample Id    = amido sub column Acetone-
Solvent      = ACETONE-D6
Actual Start Time = 23-JAN-2023 13:18:39
Revision Time   = 17-MAR-2023 16:00:05

Comment      = single pulse decoupled ga
Data Format   = 1D COMPLEX
Dim Size     = 26214
X_Domain    = Carbon
Dim Title    = Carbon13
Dim Units    = [ppm]
Dimensions   = X
Site         = JNM-ECA500
Spectrometer = DELTA2_NMR

Field Strength = 11.7473579 [T] (500 [MHz])
X_Acq_Duration = 0.83361792 [s]
X_Domain      = 13C
X_Freq        = 125.76529768 [MHz]
X_Offset      = 100 [ppm]
X Points      = 32768
X_Prescans    = 4
X_Resolution  = 1.19959034 [Hz]
X_Sweep       = 39.3081761 [kHz]
X_Sweep_Clippped = 31.44654088 [kHz]
Irr_Domain    = Proton
Irr_Freq      = 500.15991521 [MHz]
Irr_Offset    = 5.0 [ppm]
Clipped       = TRUE
Scans         = 1024
Total_Scans   = 1024

Relaxation Delay = 2 [s]
Recvr Gain       = 50
Temp_Get        = 20.1 [dC]
X_90_Width      = 9.8 [us]
X_Acq_Time      = 0.83361792 [s]
X_Angle         = 30 [deg]
X_Atn           = 4.1 [dB]
X_Pulse         = 3.26666667 [us]
Irr_Atn_Dec     = 21.078 [dB]
Irr_Atn_No     = 20.664 [dB]
Irr_Noise      = WALTZ
Irr_Pwidth     = 92 [us]
Decoupling     = TRUE
Initial_Wait    = 1 [s]
Noe             = TRUE
Noe_Time       = 2 [s]
Repetition Time = 2.83361792 [s]

```

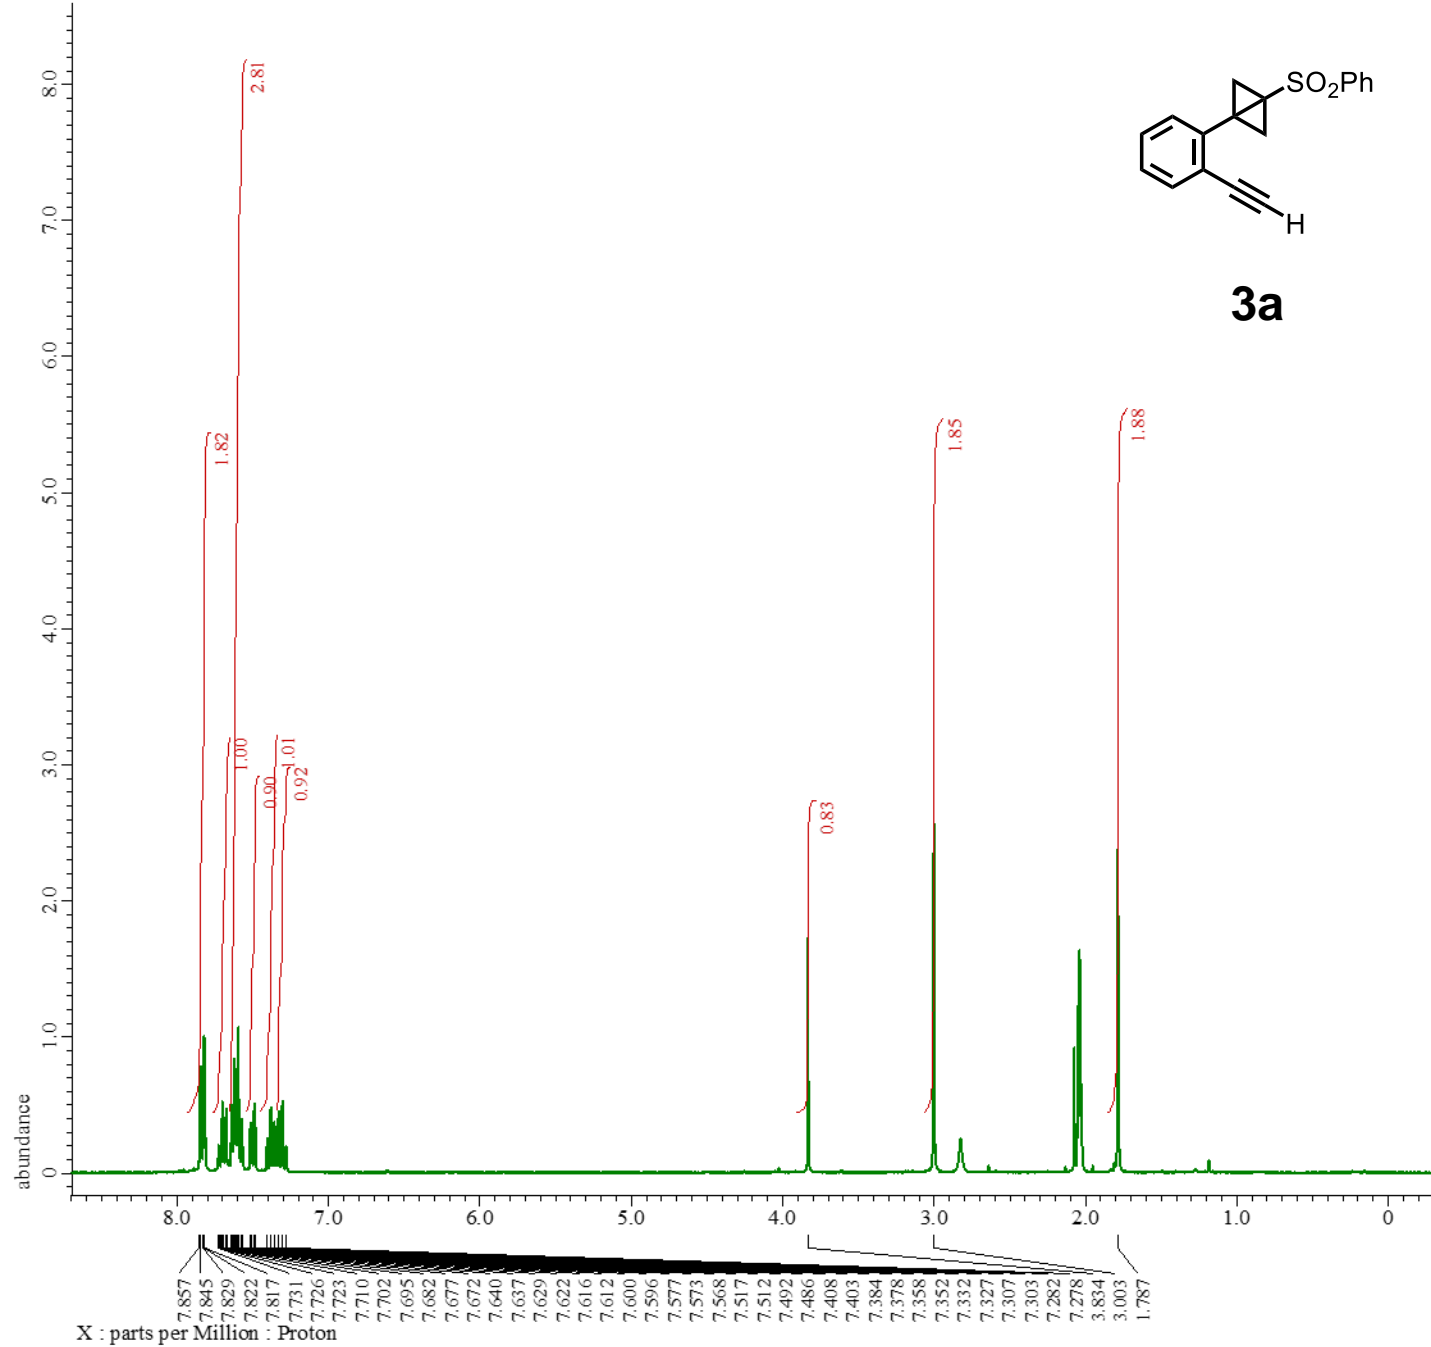

```

---- PROCESSING PARAMETERS ----
dc balance( 0, FALSE )
sexp( 0.2[Hz], 0.0[s] )
trapezoid( 0[8], 0[8], 80[8], 100[8] )
zerofill( 1, TRUE )
fft( 1, TRUE, TRUE )
machinephase
ppm

Filename      = 21 ethynyl Acetone-d6_Pro
Author       = delta
Experiment   = proton.jxp
Sample Id    = 210660 column Acetone-d6
Solvent      = ACETONE-D6
Actual Start Time = 19-DEC-2022 11:59:44
Revision Time   = 15-MAR-2023 22:46:41

Comment      = single pulse
Data Format   = 1D COMPLEX
Dim Size     = 13107
X_Domain     = Proton
Dim Title    = Proton
Dim Units    = [ppm]
Dimensions   = X
Site         = ECS 300
Spectrometer = DELTA2_NMR

Field Strength = 7.0586013[T] (300 [MHz])
X_Acq_Duration = 2.90717696 [s]
X_Domain       = 1H
X_Freq        = 300.52965592 [MHz]
X_Offset      = 5 [ppm]
X Points      = 16384
X_Prescans    = 1
X_Resolution  = 0.34397631 [Hz]
X_Sweep       = 5.63570784 [kHz]
X_Sweep_Clipped = 4.50856628 [kHz]
Irr_Domain    = Proton
Irr_Freq      = 300.52965592 [MHz]
Irr_Offset    = 5 [ppm]
Tri_Domain    = Proton
Tri_Freq      = 300.52965592 [MHz]
Tri_Offset    = 5 [ppm]
Clipped       = FALSE
Scans         = 8
Total_Scans   = 8

Relaxation_Delay = 5 [s]
Recvr_Gain       = 42
Temp_Get         = 18.6 [dC]
X_90_Width      = 11 [us]
X_Acq_Time      = 2.90717696 [s]
X_Angle         = 45 [deg]
X_Atn           = 1 [dB]
X_Pulse         = 5.5 [us]
Irr_Mode        = Off
Tri_Mode        = Off
DanTe_Presat    = FALSE
Initial_Wait    = 1 [s]
Repetition_Time = 7.90717696 [s]

```

<sup>1</sup>H NMR spectrum of **3a** (301 MHz, Acetone-*d*<sub>6</sub>)

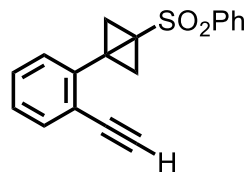

**3a**

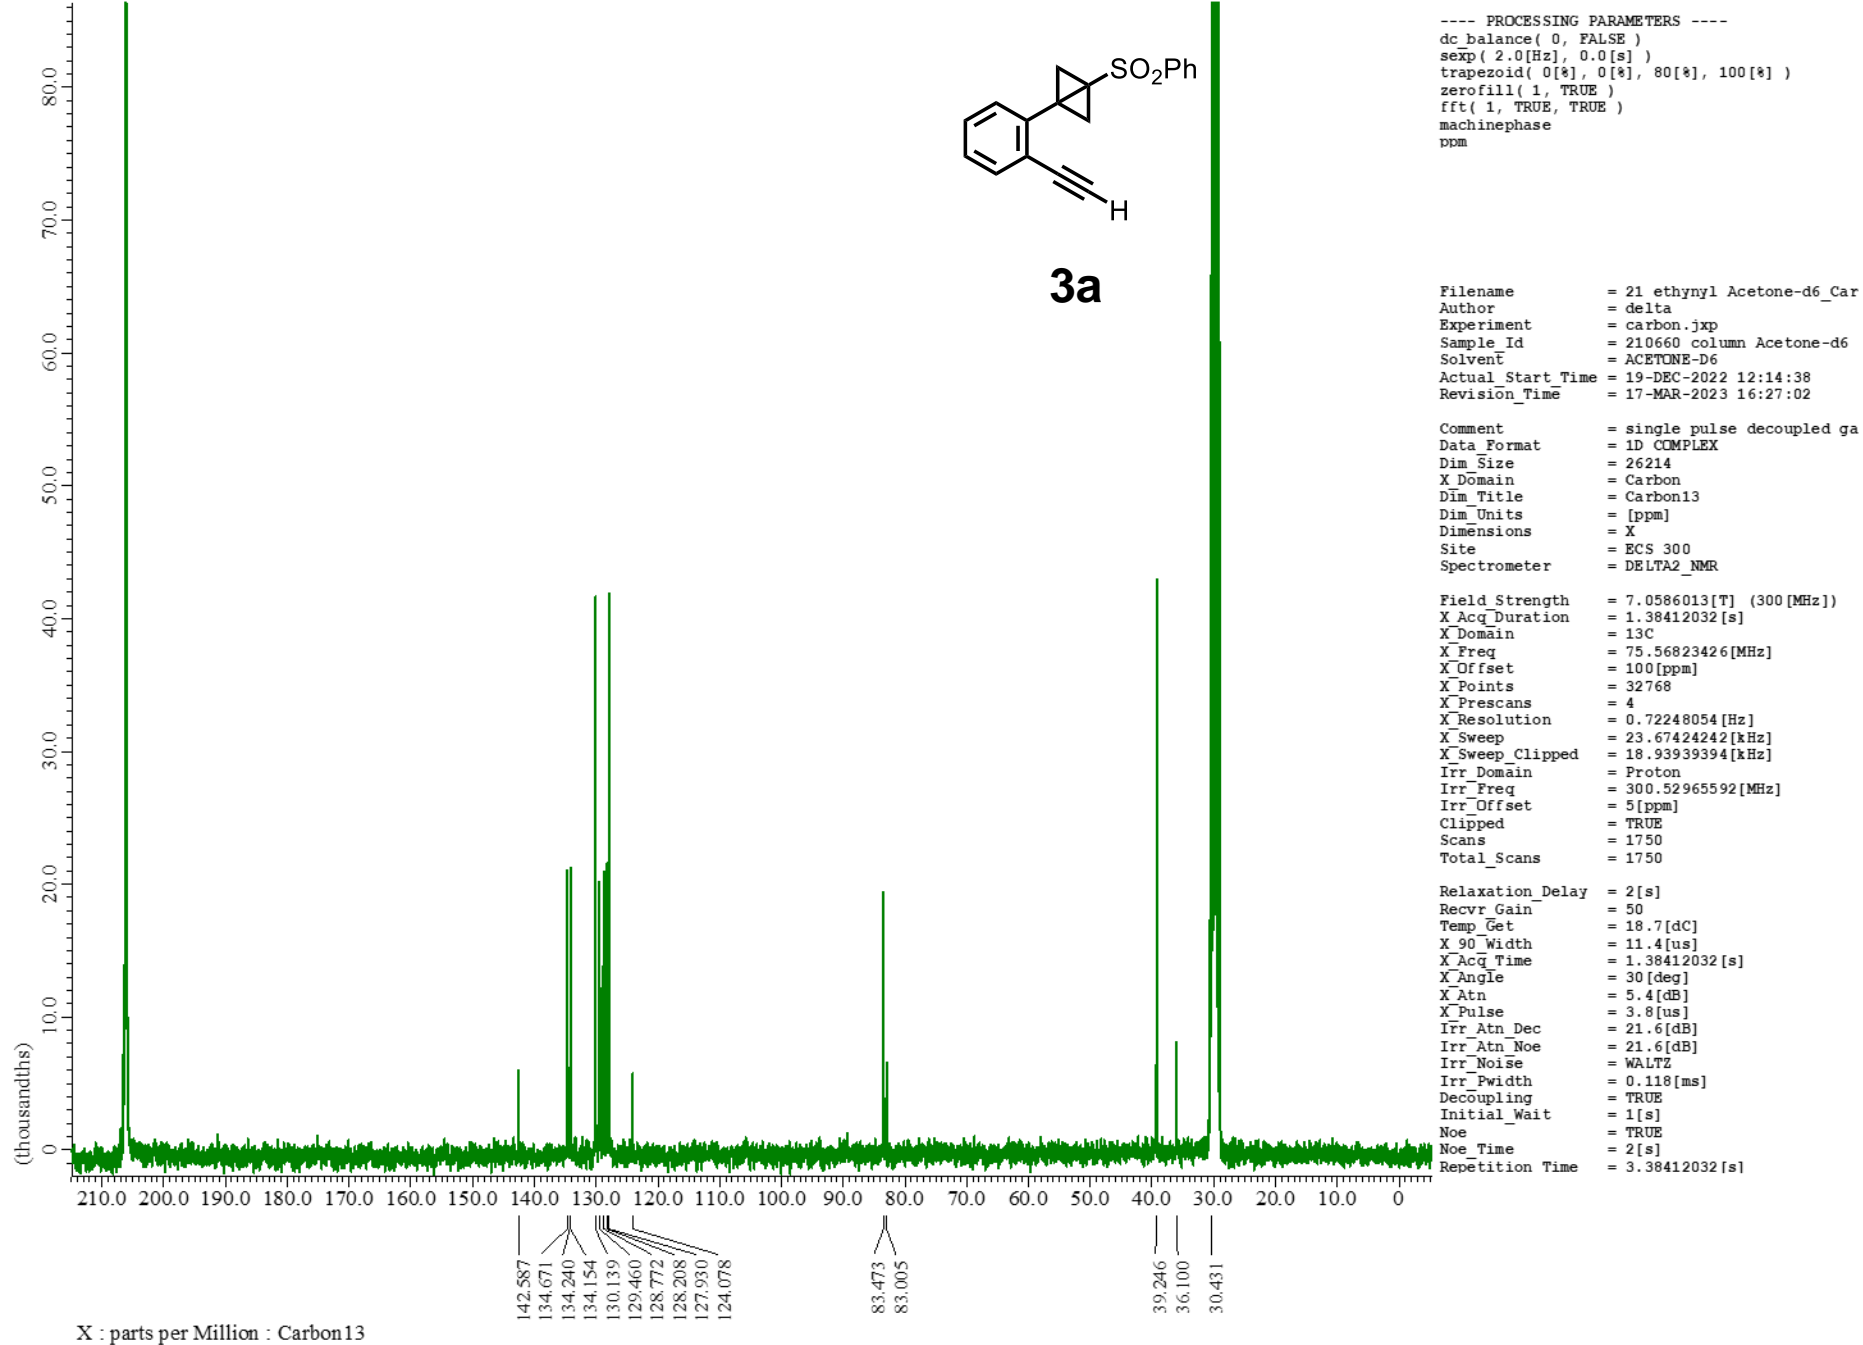

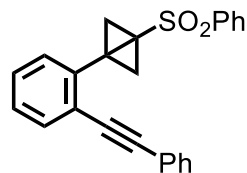

**3b**

```

---- PROCESSING PARAMETERS ----
dc balance( 0, FALSE )
sexp( 0.2[Hz], 0.0[s] )
trapezoid( 0[8], 0[8], 80[8], 100[8] )
zerofill( 1, TRUE )
fft( 1, TRUE, TRUE )
machinephase
ppm

```

```

Filename      = 22_phenylethynyl Acetone-
Author        = delta
Experiment    = proton.jxp
Sample Id     = phenylethynyl Acetone-d6
Solvent       = ACETONE-D6
Actual Start Time = 25-NOV-2022 22:37:16
Revision Time  = 16-JAN-2023 17:39:24

```

```

Comment       = single pulse
Data Format    = 1D COMPLEX
Dim Size      = 13107
X_Domain     = Proton
Dim Title     = Proton
Dim Units     = [ppm]
Dimensions    = X
Site          = ECS 400
Spectrometer  = DELTA2_NMR

```

```

Field Strength = 9.389766[T] (400[MHz])
X_Acq_Duration = 2.18365952[s]
X_Domain       = 1H
X_Freq         = 399.78219838[MHz]
X_Offset       = 5[ppm]
X_Points       = 16384
X_Prescans    = 1
X_Resolution   = 0.45794685[Hz]
X_Sweep        = 7.5030012[kHz]
X_Sweep_Clippped = 6.00240096[kHz]
Irr_Domain     = Proton
Irr_Freq       = 399.78219838[MHz]
Irr_Offset     = 5[ppm]
Tri_Domain     = Proton
Tri_Freq       = 399.78219838[MHz]
Tri_Offset     = 5[ppm]
Clipped        = FALSE
Scans          = 8
Total_Scans    = 8

```

```

Relaxation_Delay = 5[s]
Recvr_Gain       = 28
Temp_Get         = 19.8[dC]
X_90_Width       = 12.4[us]
X_Acq_Time       = 2.18365952[s]
X_Angle          = 45[deg]
X_Atn           = 3[dB]
X_Pulse          = 6.2[us]
Irr_Mode         = Off
Tri_Mode         = Off
DanTe_Presat    = FALSE
Initial_Wait     = 1[s]
Repetition_Time  = 7.18365952[s]

```

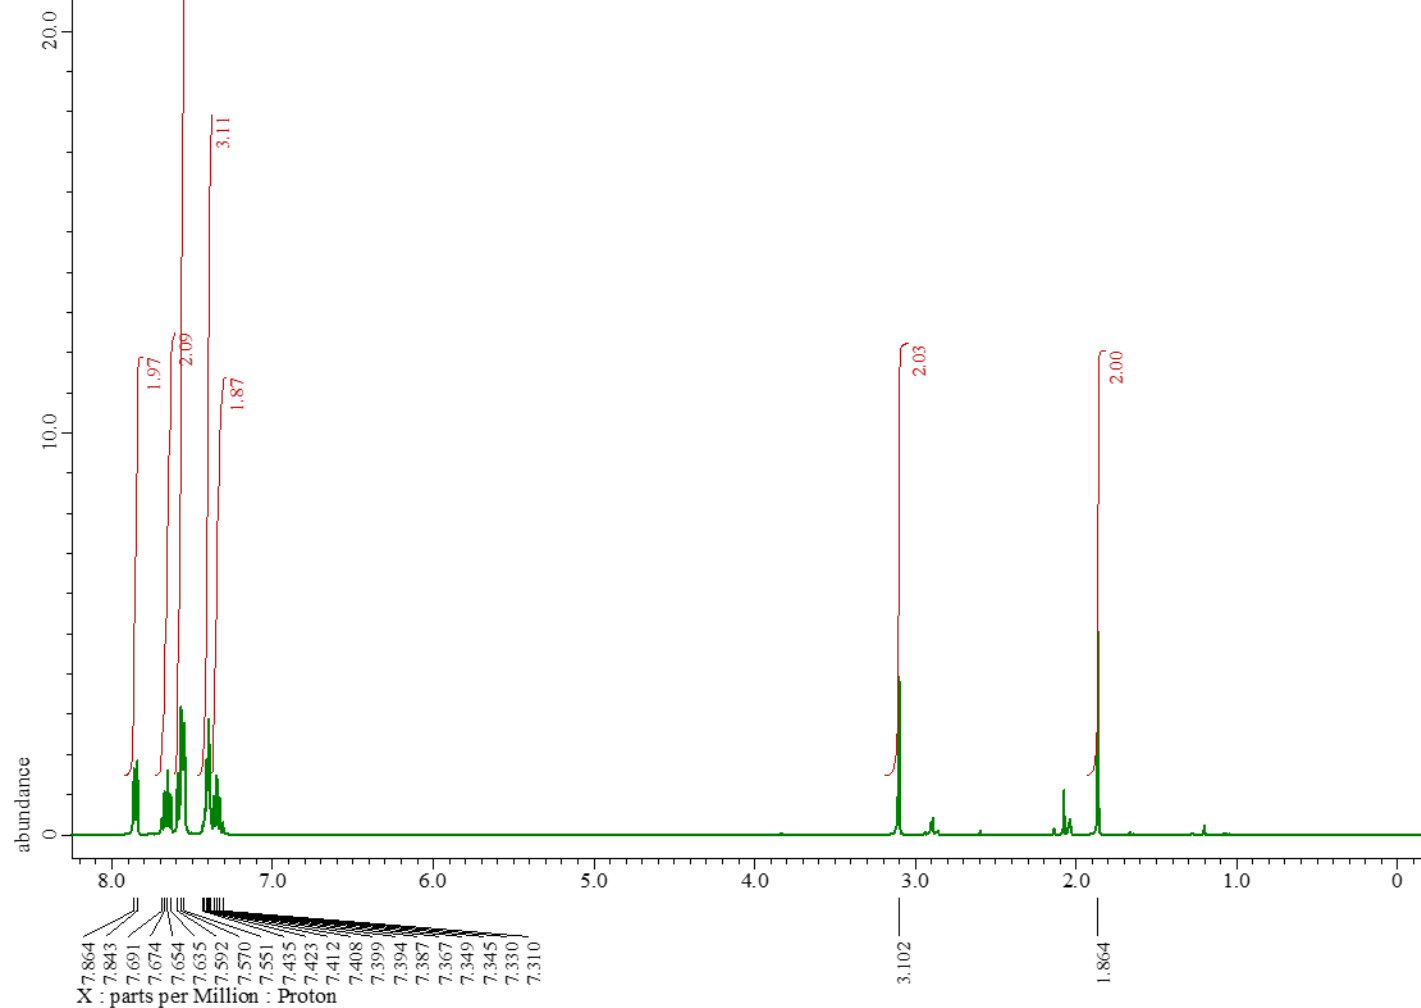

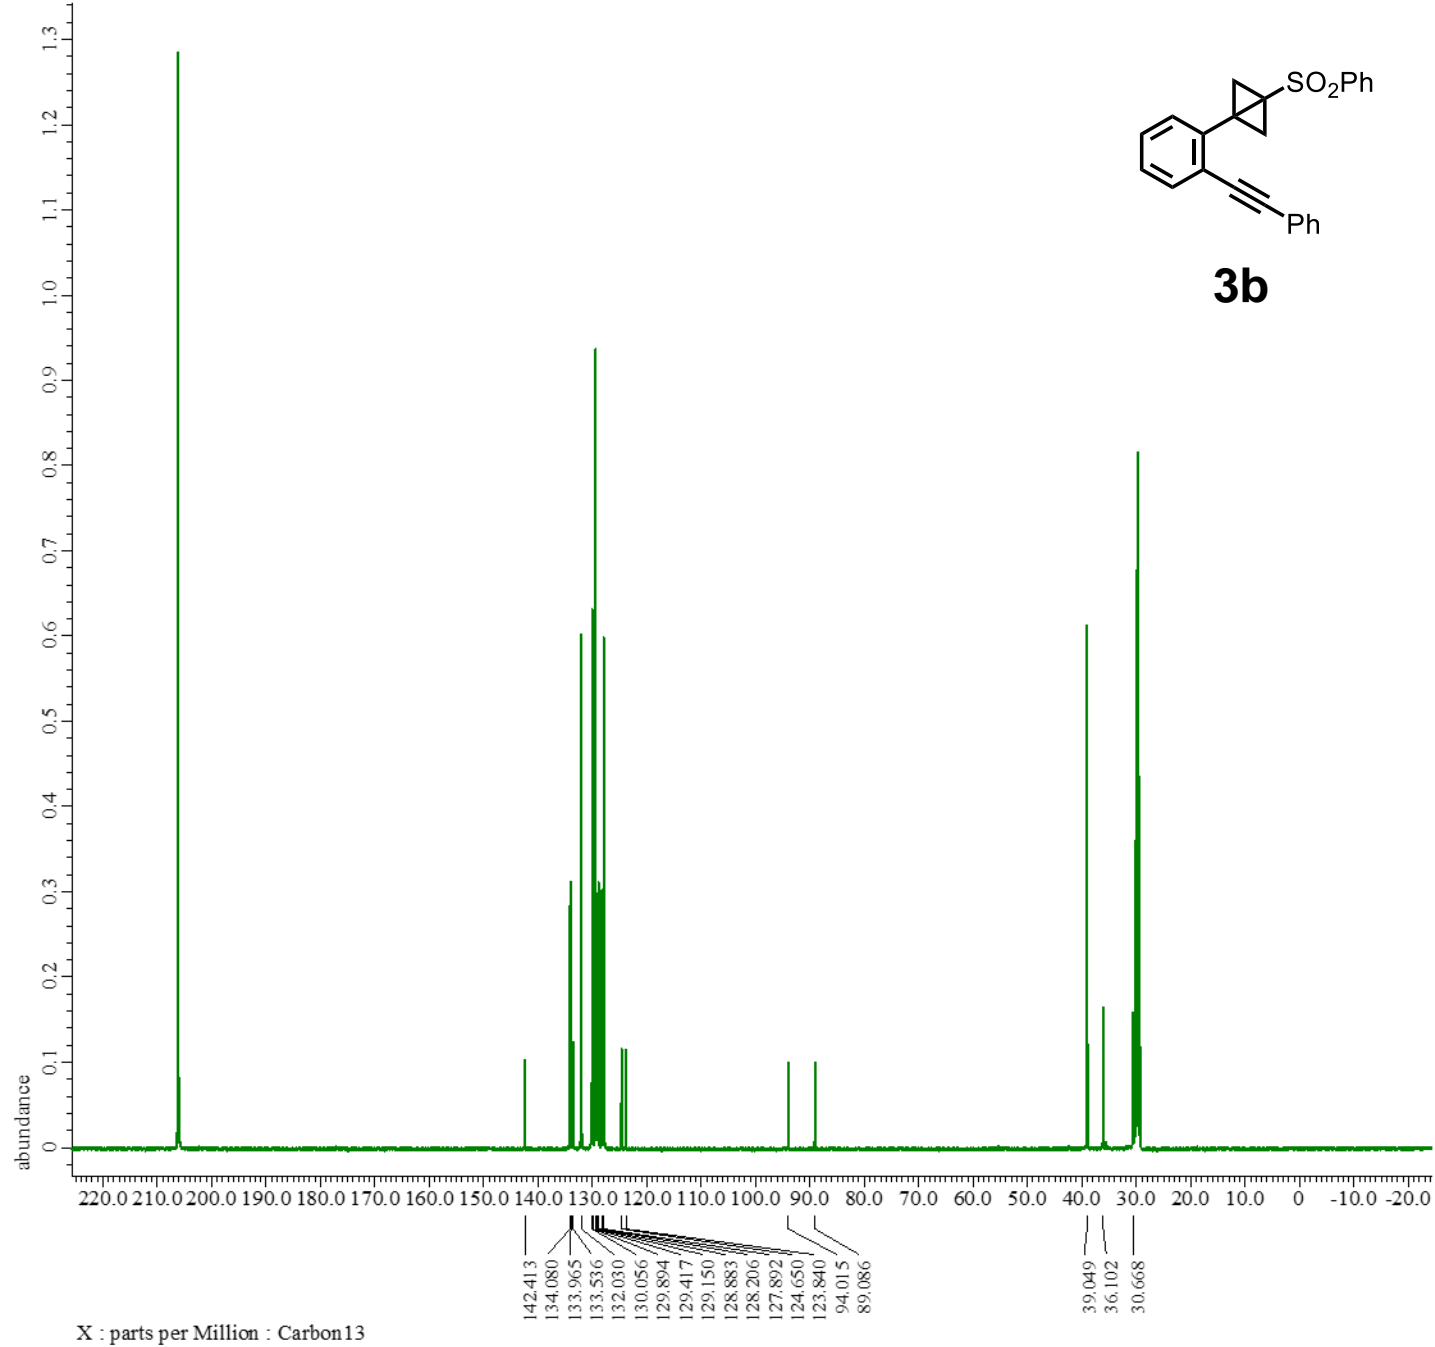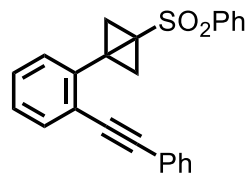

**3b**

```

---- PROCESSING PARAMETERS ----
dc balance( 0, FALSE )
sexp( 2.0[Hz], 0.0[s] )
trapezoid( 0[8], 0[8], 80[8], 100[8] )
zerofill( 1, TRUE )
fft( 1, TRUE, TRUE )
machinephase
ppm

```

```

Filename      = 22_phenylethynyl Acetone-
Author       = delta
Experiment    = carbon.jxp
Sample Id     = phenylethynyl Acetone-d6
Solvent      = ACETONE-D6
Actual Start Time = 29-NOV-2022 00:08:34
Revision Time  = 17-MAR-2023 16:47:17

```

```

Comment      = single pulse decoupled ga
Data Format   = 1D COMPLEX
Dim Size     = 26214
X_Domain    = Carbon
Dim Title    = Carbon13
Dim Units    = [ppm]
Dimensions   = X
Site         = ECS 400
Spectrometer = DELTA2_NMR

```

```

Field Strength = 9.389766[T] (400[MHz])
X_Acq_Duration = 1.04333312[s]
X_Domain      = 13C
X_Freq       = 100.52530333[MHz]
X_Offset     = 100[ppm]
X_Points     = 32768
X_Prescans   = 4
X_Resolution = 0.95846665[Hz]
X_Sweep      = 31.40703518[kHz]
X_Sweep_Clippped = 25.12562814[kHz]
Irr_Domain   = Proton
Irr_Freq     = 399.78219838[MHz]
Irr_Offset   = 5[ppm]
Clipped      = FALSE
Scans        = 1024
Total_Scans  = 1024

```

```

Relaxation_Delay = 2[s]
Recvr Gain       = 50
Temp_Get        = 19.9[dC]
X_90_Width     = 9[us]
X_Acq_Time      = 1.04333312[s]
X_Angle        = 30[deg]
X_Atn          = 4.7[dB]
X_Pulse        = 3[us]
Irr_Atn_Dec    = 22.346[dB]
Irr_Atn_Noise  = 22.346[dB]
Irr_Noise      = WALTZ
Irr_Pwidth     = 0.115[ms]
Decoupling     = TRUE
Initial_Wait   = 1[s]
Noe            = TRUE
Noe_Time       = 2[s]
Repetition Time = 3.04333312[s]

```

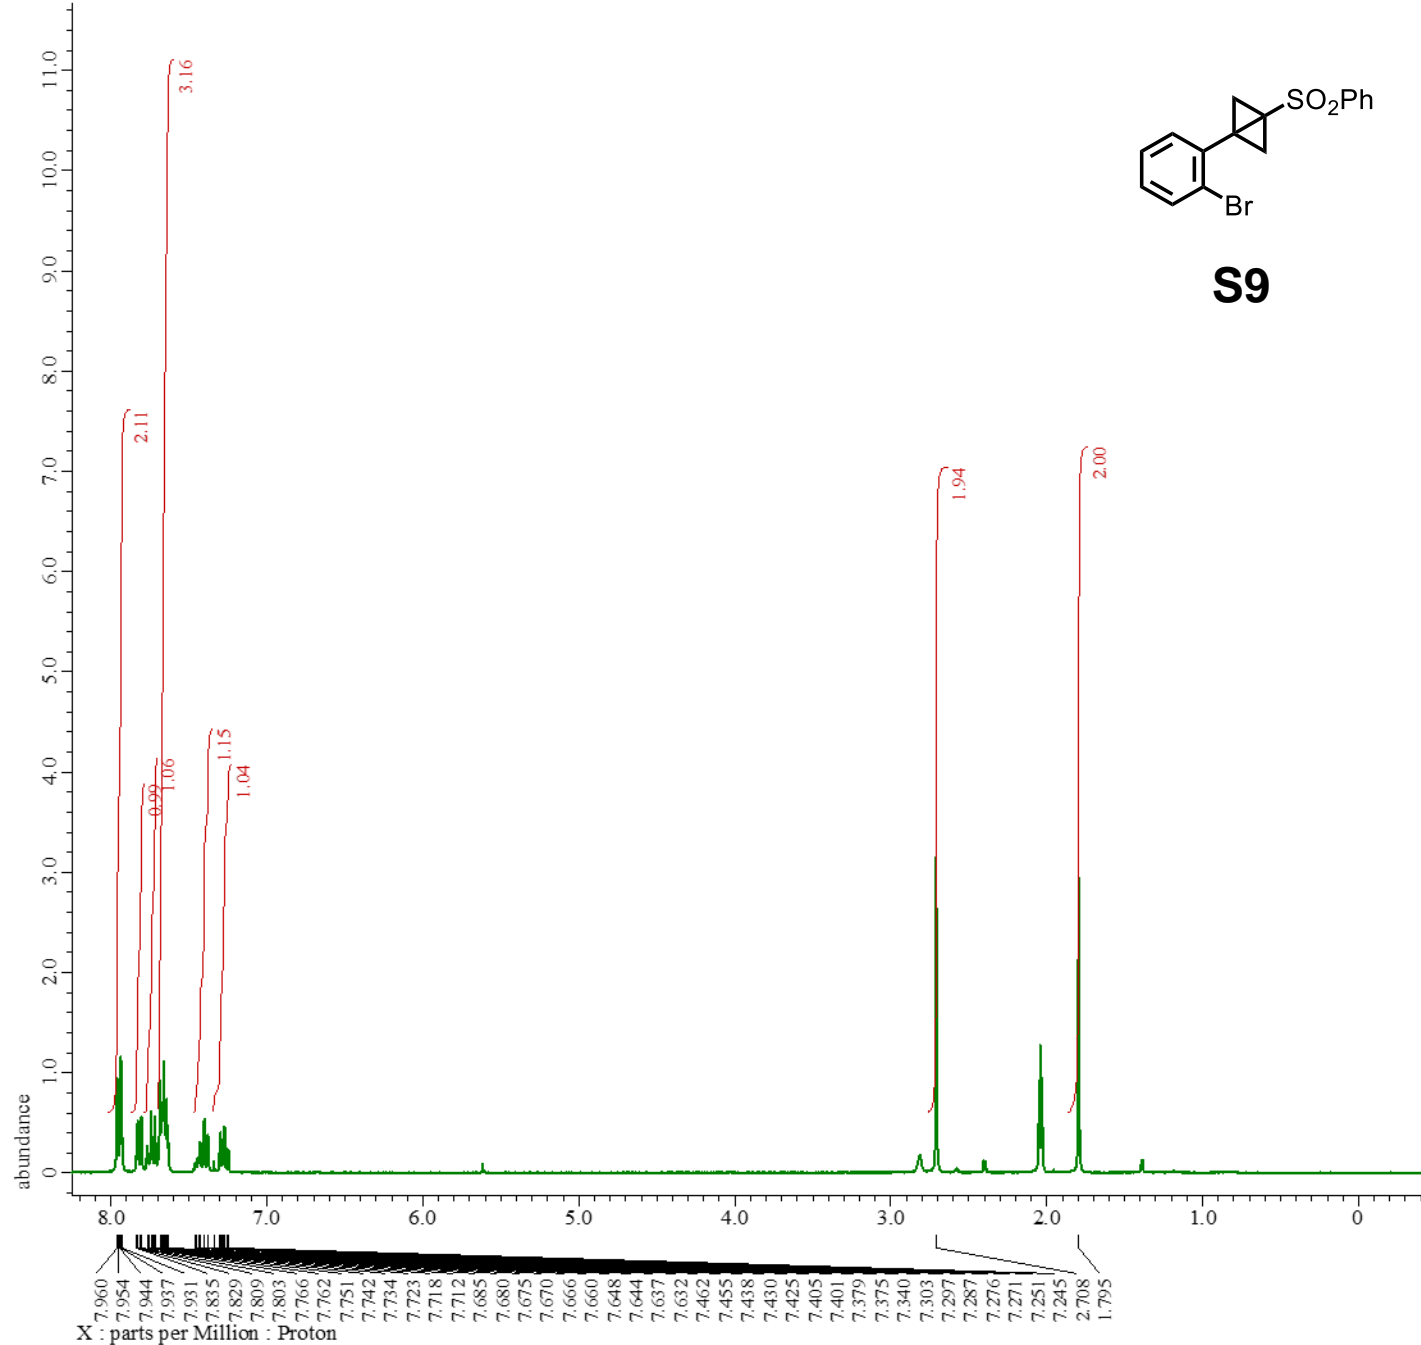

```

---- PROCESSING PARAMETERS ----
dc balance( 0, FALSE )
sexp( 0.2[Hz], 0.0[s] )
trapezoid( 0[8], 0[8], 80[8], 100[8] )
zerofill( 1, TRUE )
fft( 1, TRUE, TRUE )
machinephase
ppm

Filename      = 25 Bromo sub Acetone-d6_P
Author       = delta
Experiment   = proton.jxp
Sample Id    = Bromo sub Acetone-d6
Solvent      = ACETONE-D6
Actual Start Time = 5-NOV-2022 20:48:03
Revision Time   = 18-JAN-2023 09:41:05

Comment      = single pulse
Data Format   = 1D COMPLEX
Dim Size     = 13107
X_Domain     = Proton
Dim Title    = Proton
Dim Units    = [ppm]
Dimensions   = X
Site         = ECS 300
Spectrometer = DELTA2_NMR

Field Strength = 7.0586013[T] (300 [MHz])
X_Acq_Duration = 2.90717696 [s]
X_Domain       = 1H
X_Freq         = 300.52965592 [MHz]
X_Offset       = 5 [ppm]
X Points       = 16384
X_Prescans     = 1
X_Resolution   = 0.34397631 [Hz]
X_Sweep        = 5.63570784 [kHz]
X_Sweep_Clippped = 4.50856628 [kHz]
Irr_Domain     = Proton
Irr_Freq       = 300.52965592 [MHz]
Irr_Offset     = 5 [ppm]
Tri_Domain     = Proton
Tri_Freq       = 300.52965592 [MHz]
Tri_Offset     = 5 [ppm]
Clipped        = FALSE
Scans          = 8
Total_Scans    = 8

Relaxation_Delay = 5 [s]
Recvr_Gain       = 40
Temp_Get         = 20.4 [dC]
X_90_Width       = 11 [us]
X_Acq_Time       = 2.90717696 [s]
X_Angle          = 45 [deg]
X_Atn            = 1 [dB]
X_Pulse          = 5.5 [us]
Irr_Mode         = Off
Tri_Mode         = Off
DanTe_Presat    = FALSE
Initial_Wait     = 1 [s]
Repetition_Time = 7.90717696 [s]

```

<sup>1</sup>H NMR spectrum of **S9** (301 MHz, Acetone-*d*<sub>6</sub>)

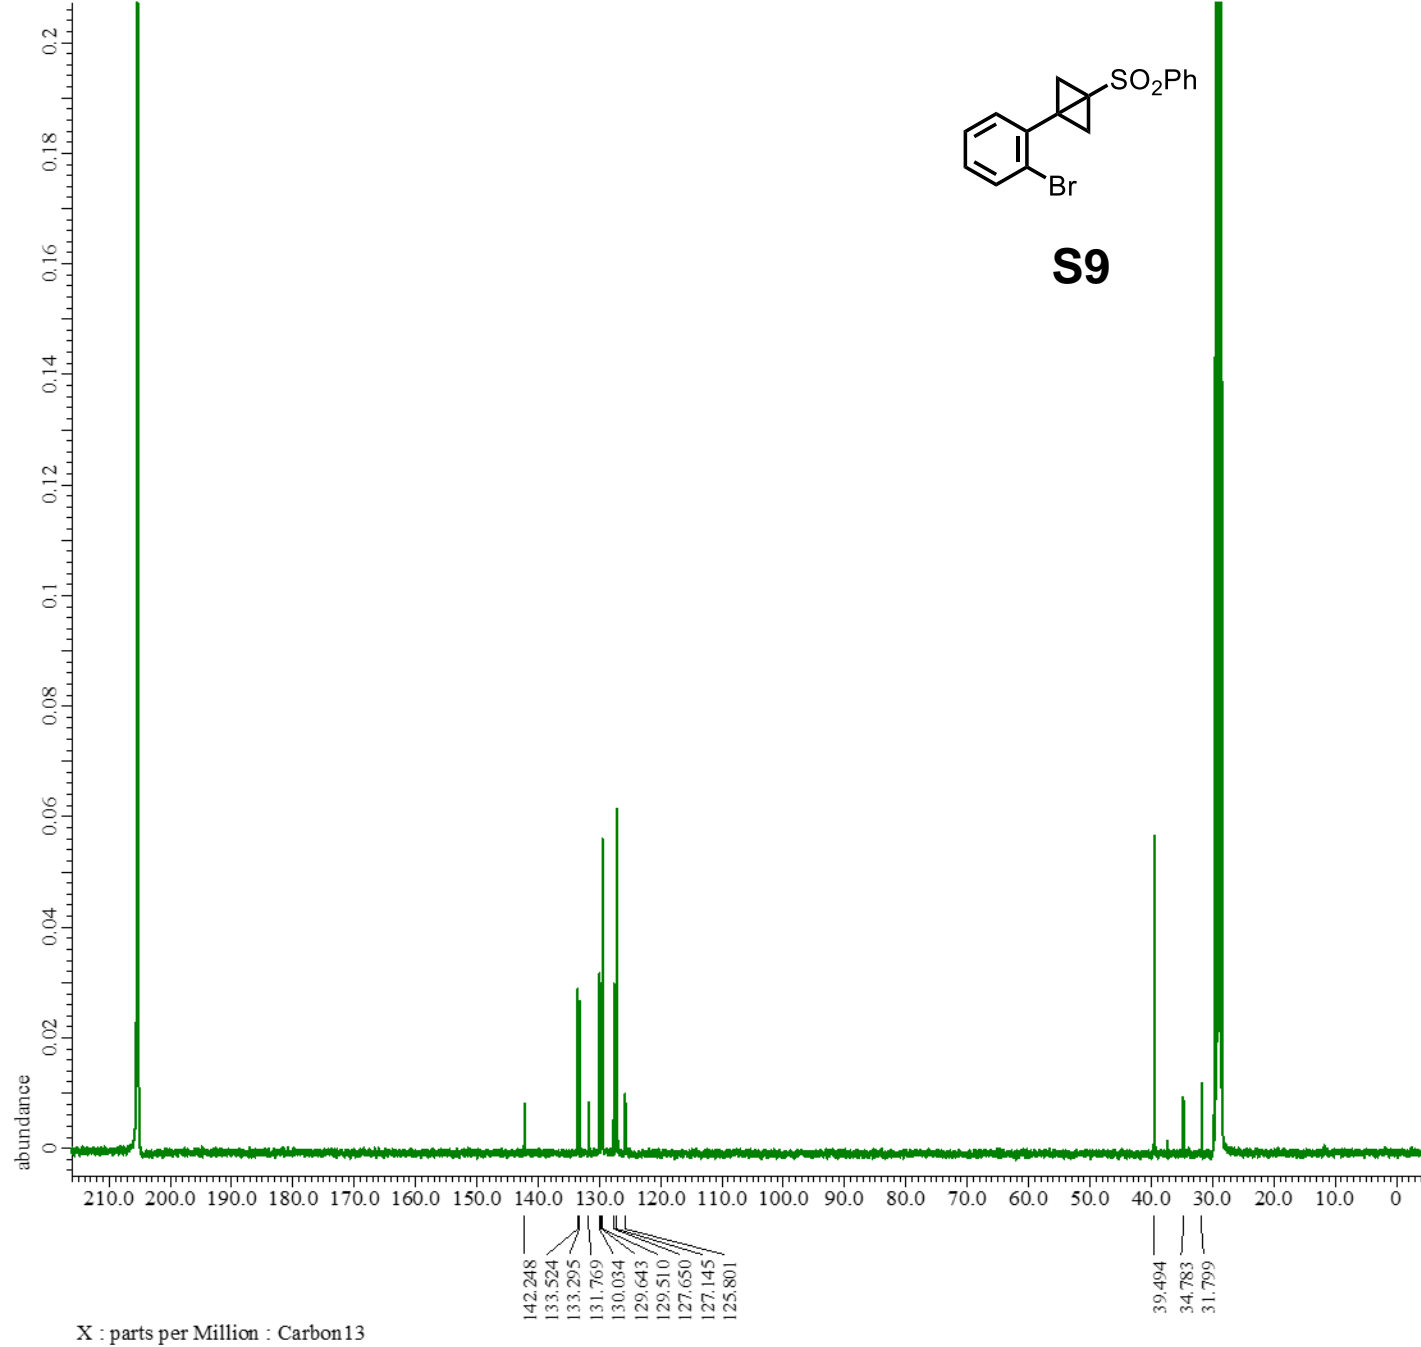

```

---- PROCESSING PARAMETERS ----
dc balance( 0, FALSE )
sexp( 2.0[Hz], 0.0[s] )
trapezoid( 0[8], 0[8], 80[8], 100[8] )
zerofill( 1, TRUE )
fft( 1, TRUE, TRUE )
machinephase
ppm

Filename = 25 Bromo sub_Carbon-1-3.j
Author = delta
Experiment = carbon.jxp
Sample Id = Bromo sub
Solvent = ACETONE-D6
Actual_Start_Time = 13-NOV-2022 00:05:43
Revision_Time = 17-MAR-2023 16:48:26

Comment = single pulse decoupled ga
Data Format = 1D COMPLEX
Dim Size = 26214
X_Domain = Carbon
Dim Title = Carbon13
Dim Units = [ppm]
Dimensions = X
Site = ECS 400
Spectrometer = DELTA2_NMR

Field Strength = 9.389766[T] (400[MHz])
X_Acq_Duration = 1.04333312[s]
X_Domain = 13C
X_Freq = 100.52530333[MHz]
X_Offset = 100[ppm]
X Points = 32768
X_Prescans = 4
X_Resolution = 0.95846665[Hz]
X_Sweep = 31.40703518[kHz]
X_Sweep_Clippped = 25.12562814[kHz]
Irr_Domain = Proton
Irr_Freq = 399.78219838[MHz]
Irr_Offset = 5[ppm]
Clipped = FALSE
Scans = 4650
Total_Scans = 4650

Relaxation_Delay = 2[s]
Recvr Gain = 50
Temp_Get = 20[dC]
X_90_Width = 9[us]
X_Acq_Time = 1.04333312[s]
X_Angle = 30[deg]
X_Atn = 4.7[dB]
X_Pulse = 3[us]
Irr_Atn_Dec = 22.346[dB]
Irr_Atn_Noe = 22.346[dB]
Irr_Noise = WALTZ
Irr_Pwidth = 0.115[ms]
Decoupling = TRUE
Initial_Wait = 1[s]
Noe = TRUE
Noe_Time = 2[s]
Repetition Time = 3.04333312[s]

```

X : parts per Million : Carbon13



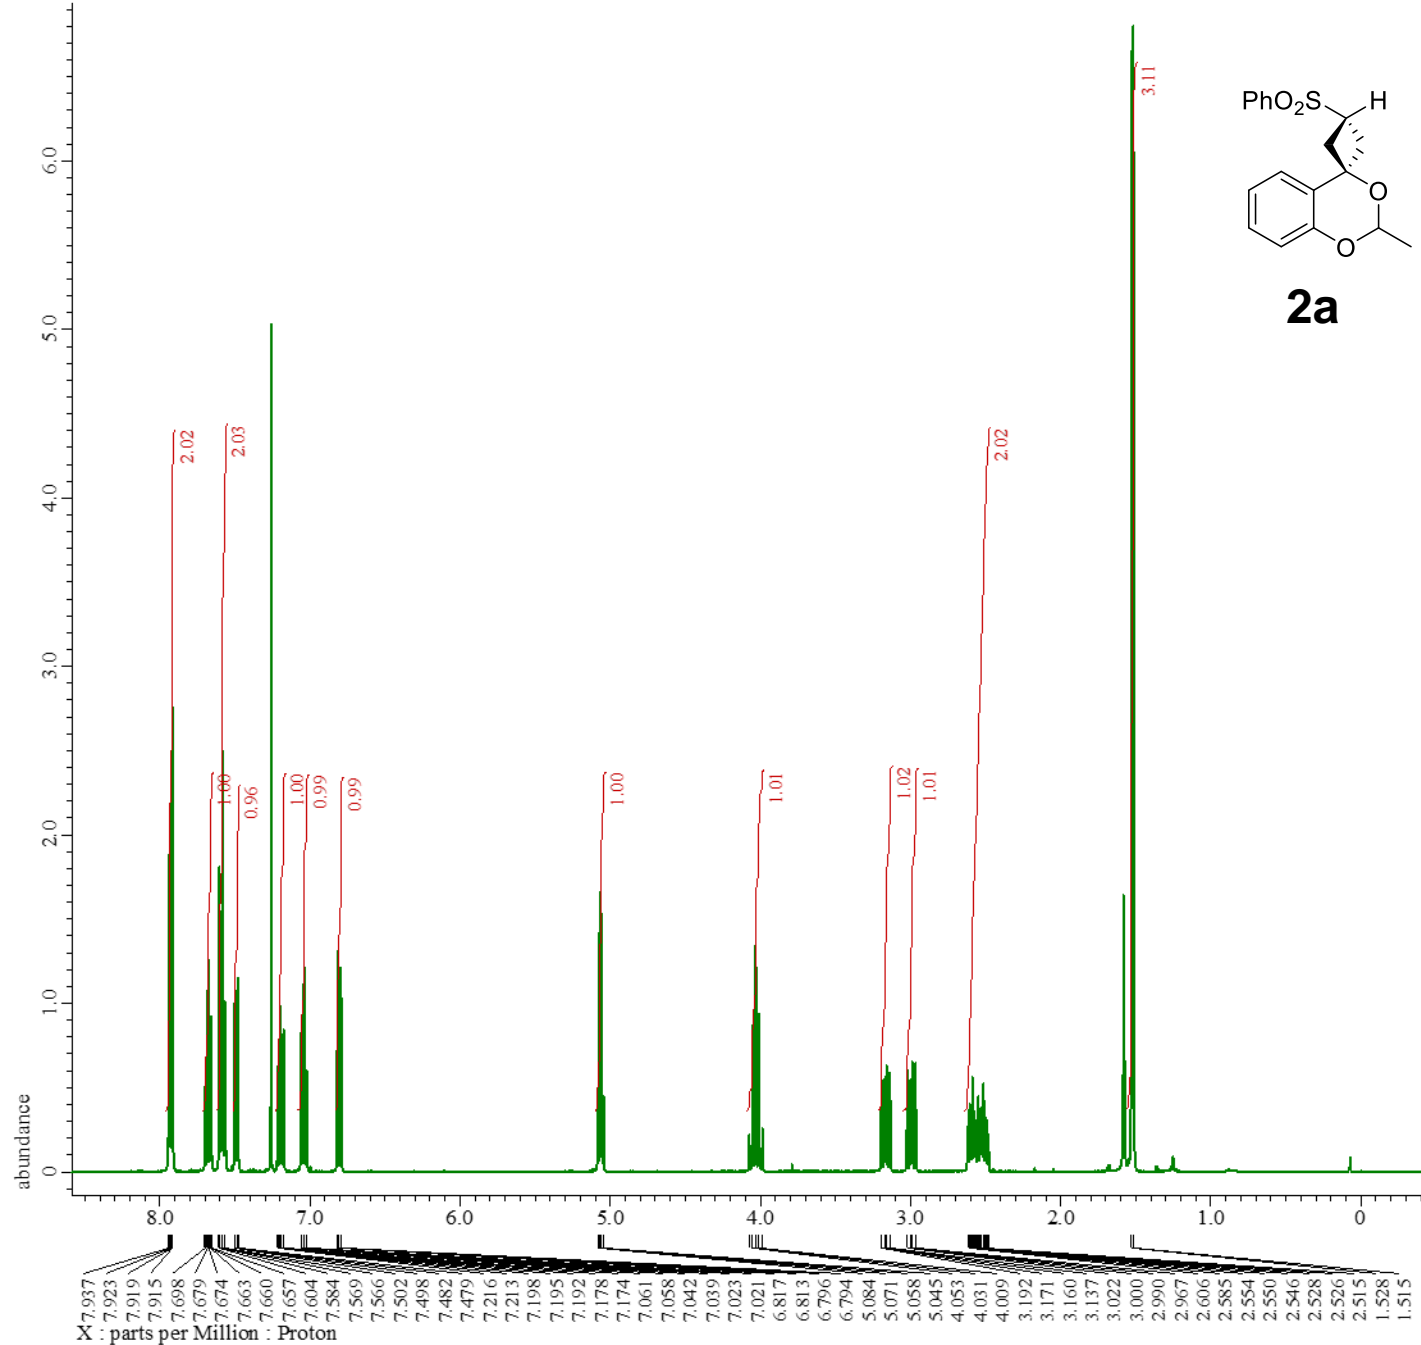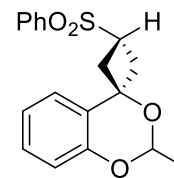

**2a**

```

---- PROCESSING PARAMETERS ----
dc balance( 0, FALSE )
sexp( 0.2[Hz], 0.0[s] )
trapezoid( 0[8], 0[8], 80[8], 100[8] )
zerofill( 1, TRUE )
fft( 1, TRUE, TRUE )
machinephase
ppm

```

```

Filename      = 11 ue CDC13_Proton-1-3.jd
Author        = delta
Experiment    = proton.jxp
Sample Id     = ue CDC13
Solvent       = CHLOROFORM-D
Actual Start Time = 7-NOV-2022 13:41:35
Revision Time  = 16-MAR-2023 10:48:11

```

```

Comment       = single pulse
Data Format    = 1D COMPLEX
Dim Size      = 13107
X_Domain      = Proton
Dim Title     = Proton
Dim Units     = [ppm]
Dimensions    = X
Site          = ECS 400
Spectrometer  = DELTA2_NMR

Field Strength = 9.389766[T] (400[MHz])
X Acq_Duration = 2.18365952[s]
X_Domain       = 1H
X_Freq         = 399.78219838[MHz]
X_Offset       = 5[ppm]
X_Points       = 16384
X_Prescans     = 1
X_Resolution   = 0.45794685[Hz]
X_Sweep        = 7.5030012[kHz]
X_Sweep_Clippped = 6.00240096[kHz]
Irr_Domain     = Proton
Irr_Freq       = 399.78219838[MHz]
Irr_Offset     = 5[ppm]
Tri_Domain     = Proton
Tri_Freq       = 399.78219838[MHz]
Tri_Offset     = 5[ppm]
Clipped        = FALSE
Scans          = 8
Total_Scans    = 8

```

```

Relaxation Delay = 5[s]
Recvr Gain       = 44
Temp_Get         = 20.1[dc]
X_90_Width       = 12.4[us]
X_Acq_Time       = 2.18365952[s]
X_Angle          = 45[deg]
X_Atn            = 3[dB]
X_Pulse          = 6.2[us]
Irr_Mode         = Off
Tri_Mode         = Off
Dante_Presat     = FALSE
Initial Wait     = 1[s]
Repetition Time  = 7.18365952[s]

```

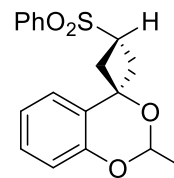

**2a**

```

---- PROCESSING PARAMETERS ----
dc balance( 0, FALSE )
sexp( 2.0[Hz], 0.0[s] )
trapezoid( 0[8], 0[8], 80[8], 100[8] )
zerofill( 1, TRUE )
fft( 1, TRUE, TRUE )
machinephase
ppm

```

```

Filename      = 11 ue CDC13_Carbon-1-2.jd
Author       = delta
Experiment   = carbon.jxp
Sample Id    = ue CDC13
Solvent      = CHLOROFORM-D
Actual Start Time = 31-OCT-2022 09:34:22
Revision Time   = 5-JAN-2023 16:44:24

```

```

Comment      = single pulse decoupled ga
Data Format   = 1D COMPLEX
Dim Size     = 26214
X_Domain    = Carbon
Dim Title    = Carbon13
Dim Units    = [ppm]
Dimensions   = X
Site         = ECS 400
Spectrometer = DELTA2_NMR

```

```

Field Strength = 9.389766[T] (400[MHz])
X_Acq_Duration = 1.04333312[s]
X_Domain      = 13C
X_Freq       = 100.52530333[MHz]
X_Offset     = 100[ppm]
X Points     = 32768
X_Prescans   = 4
X_Resolution = 0.95846665[Hz]
X_Sweep      = 31.40703518[kHz]
X_Sweep_Clip = 25.12562814[kHz]
Irr_Domain   = Proton
Irr_Freq     = 399.78219838[MHz]
Irr_Offset   = 5[ppm]
Clipped      = FALSE
Scans        = 512
Total_Scans  = 512

```

```

Relaxation_Delay = 2[s]
Recvr Gain       = 50
Temp_Get         = 20.2[dC]
X_90_Width      = 9[us]
X_Acq_Time      = 1.04333312[s]
X_Angle         = 30[deg]
X_Atn           = 4.7[dB]
X_Pulse         = 3[us]
Irr_Atn_Dec     = 22.346[dB]
Irr_Atn_Noise   = 22.346[dB]
Irr_Noise       = WALTZ
Irr_Pwidth      = 0.115[ms]
Decoupling      = TRUE
Initial_Wait    = 1[s]
Noe              = TRUE
Noe Time        = 2[s]
Repetition Time = 3.04333312[s]

```

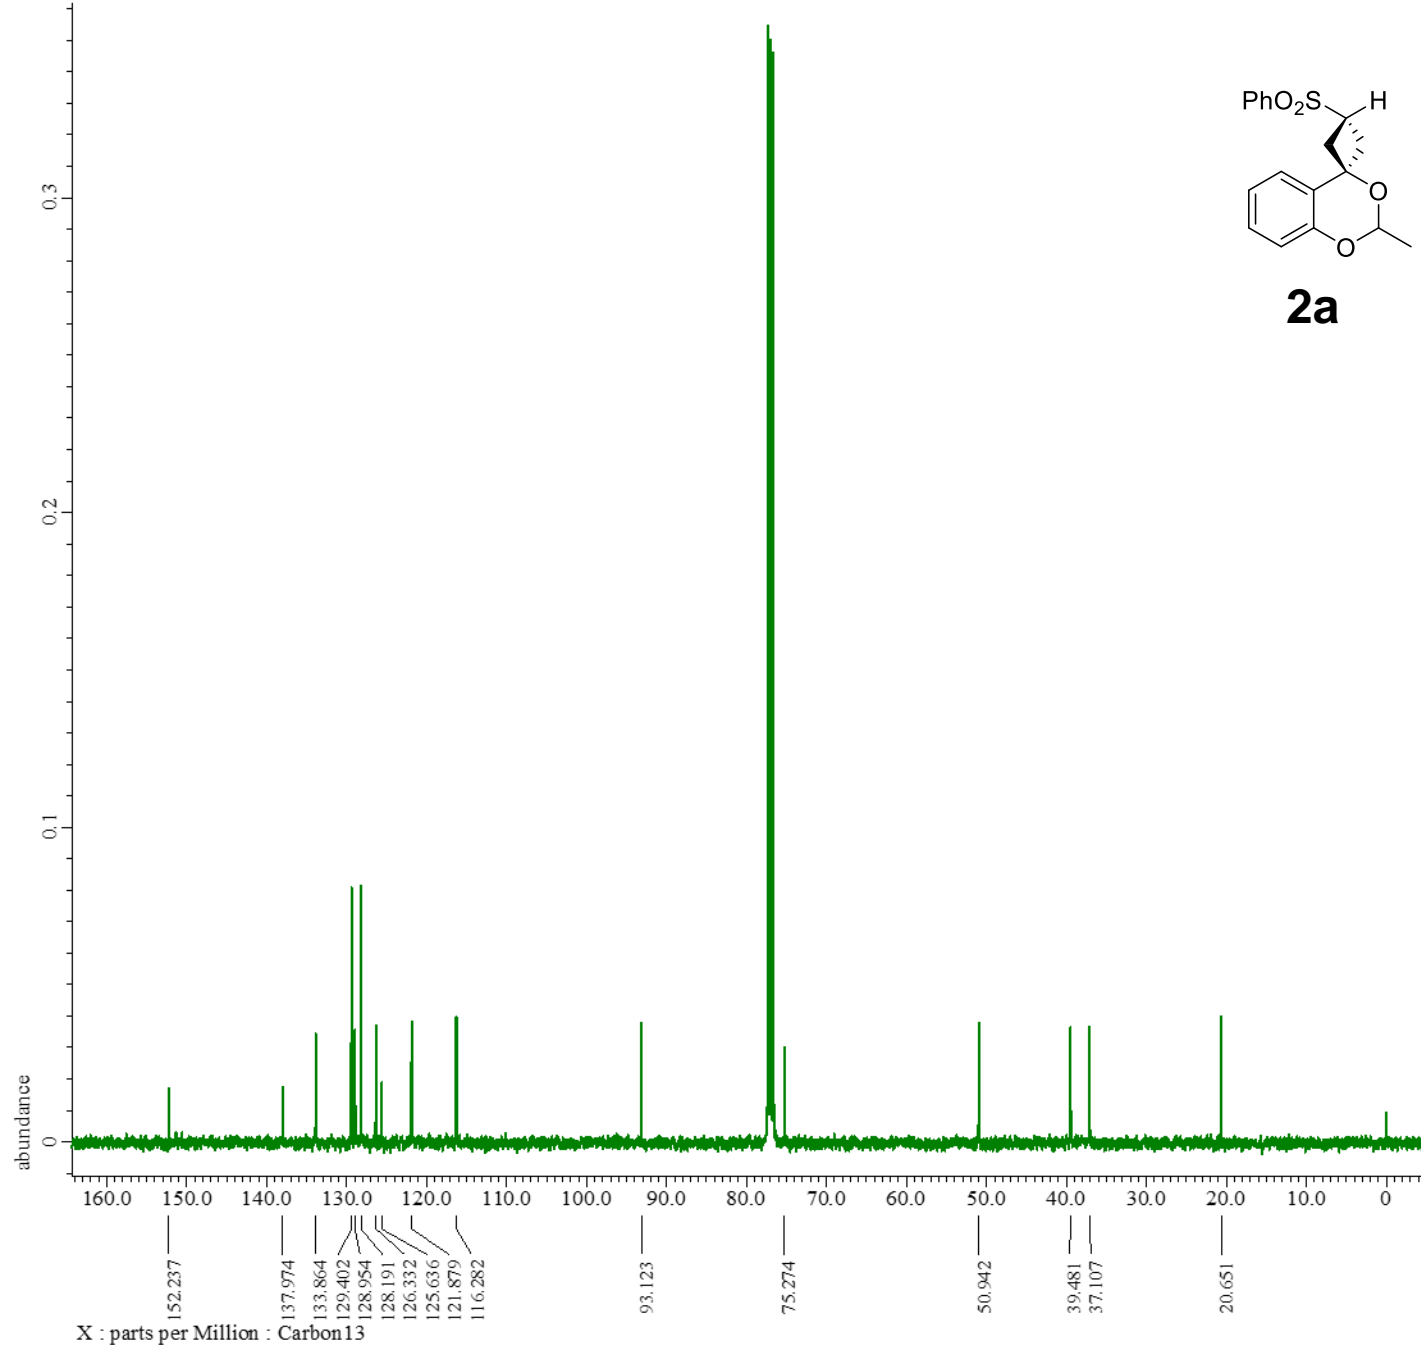

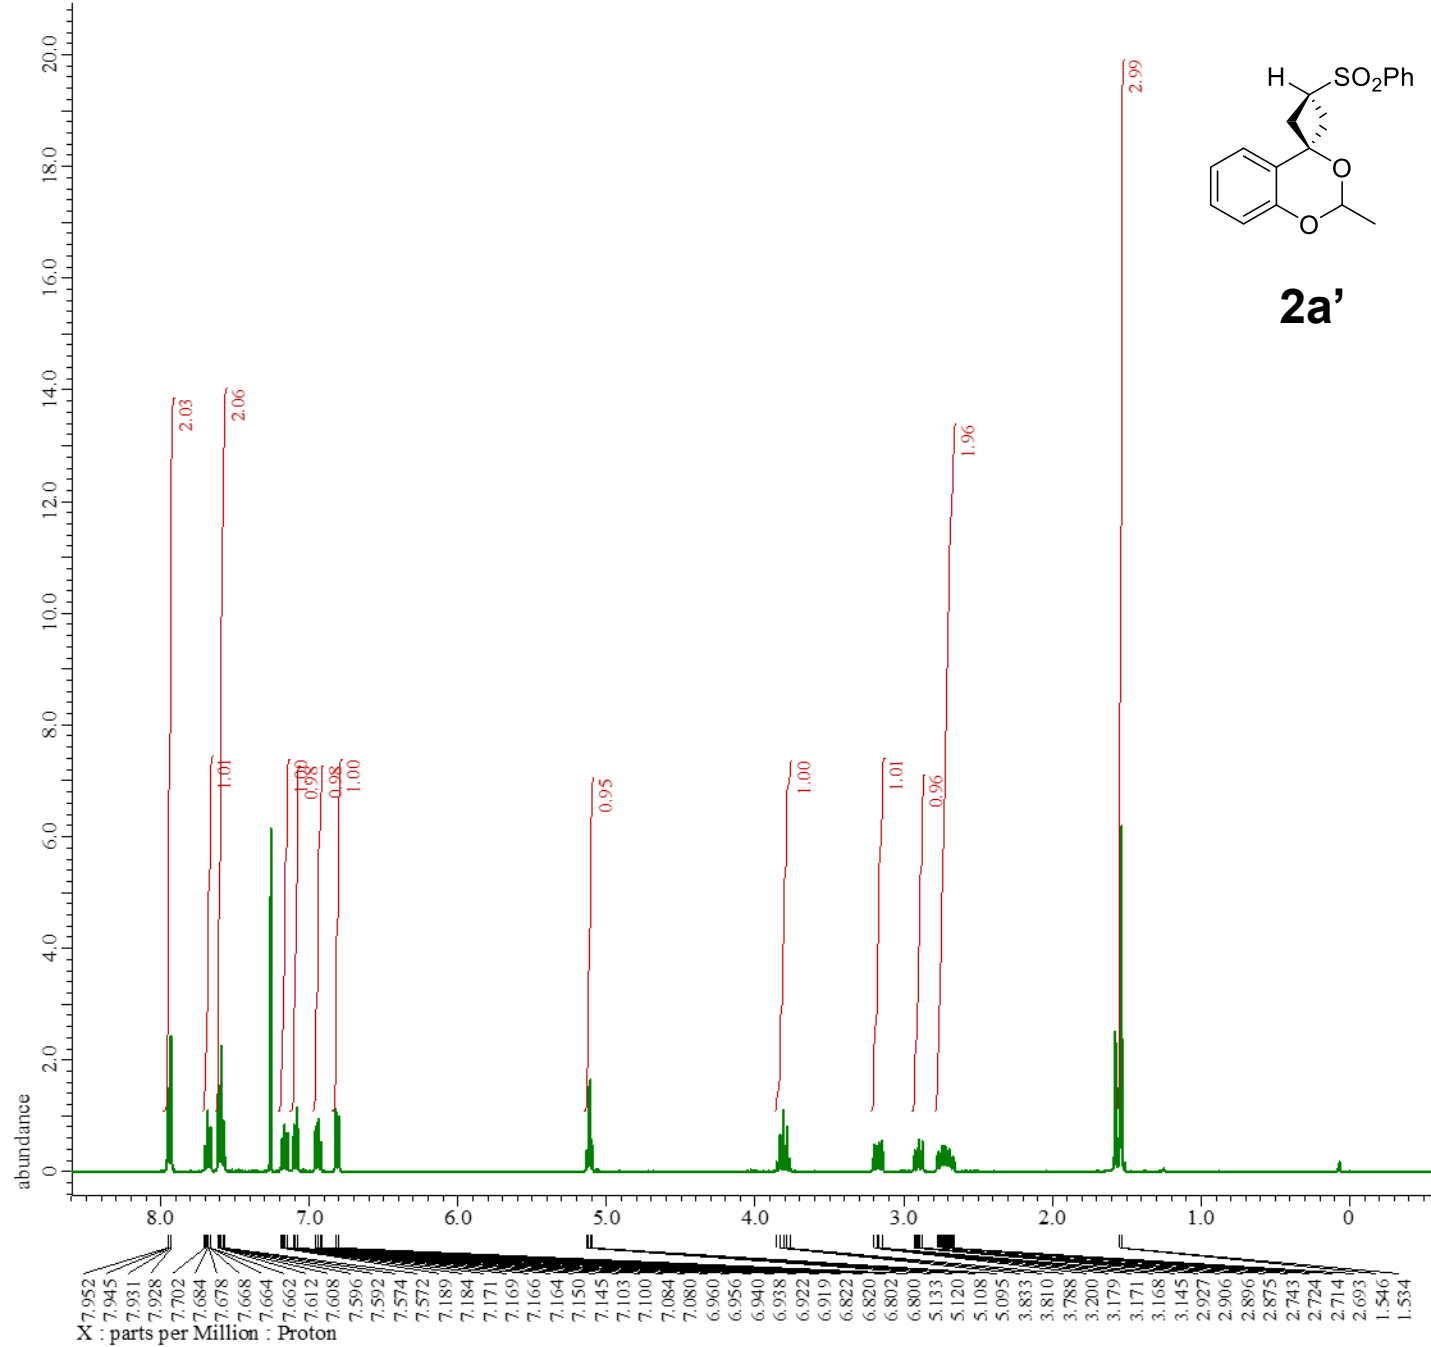

```

---- PROCESSING PARAMETERS ----
dc balance( 0, FALSE )
sexp( 0.2[Hz], 0.0[s] )
trapezoid( 0[8], 0[8], 80[8], 100[8] )
zerofill( 1, TRUE )
fft( 1, TRUE, TRUE )
machinephase
ppm

Filename      = 11 shita CDC13_Proton-1-3
Author       = delta
Experiment   = proton.jxp
Sample Id    = shita CDC13
Solvent      = CHLOROFORM-D
Actual Start Time = 7-NOV-2022 13:47:56
Revision Time   = 16-MAR-2023 10:48:41

Comment      = single pulse
Data Format   = 1D COMPLEX
Dim Size     = 13107
X_Domain    = Proton
Dim Title    = Proton
Dim Units    = [ppm]
Dimensions   = X
Site         = ECS 400
Spectrometer = DELTA2_NMR

Field Strength = 9.389766[T] (400[MHz])
X_Acq_Duration = 2.18365952[s]
X_Domain      = 1H
X_Freq        = 399.78219838[MHz]
X_Offset      = 5[ppm]
X Points      = 16384
X_Prescans    = 1
X_Resolution  = 0.45794685[Hz]
X_Sweep       = 7.5030012[kHz]
X_Sweep_Clipped = 6.00240096[kHz]
Irr_Domain    = Proton
Irr_Freq      = 399.78219838[MHz]
Irr_Offset    = 5[ppm]
Tri_Domain    = Proton
Tri_Freq      = 399.78219838[MHz]
Tri_Offset    = 5[ppm]
Clipped       = FALSE
Scans         = 8
Total_Scans   = 8

Relaxation_Delay = 5[s]
Recvr_Gain       = 46
Temp_Get         = 20.1[dc]
X_90_Width      = 12.4[us]
X_Acq_Time      = 2.18365952[s]
X_Angle         = 45[deg]
X_Atn           = 3[db]
X_Pulse         = 6.2[us]
Irr_Mode        = Off
Tri_Mode        = Off
DANTE_Presat    = FALSE
Initial_Wait    = 1[s]
Repetition_Time = 7.18365952[s]

```

<sup>1</sup>H NMR spectrum of **2a'** (400 MHz, CDCl<sub>3</sub>)

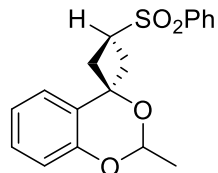

**2a'**

```

---- PROCESSING PARAMETERS ----
dc balance( 0, FALSE )
sexp( 2.0[Hz], 0.0[s] )
trapezoid( 0[8], 0[8], 80[8], 100[8] )
zerofill( 1, TRUE )
fft( 1, TRUE, TRUE )
machinephase
ppm

```

```

Filename      = 11 shita CDC13_Carbon-1-2
Author       = delta
Experiment   = carbon.jxp
Sample Id    = shita CDC13
Solvent      = CHLOROFORM-D
Actual Start Time = 31-OCT-2022 10:07:39
Revision Time   = 7-JAN-2023 09:41:49

```

```

Comment      = single pulse decoupled ga
Data Format   = 1D COMPLEX
Dim Size     = 26214
X_Domain     = Carbon
Dim Title    = Carbon13
Dim Units    = [ppm]
Dimensions   = X
Site         = ECS 400
Spectrometer = DELTA2_NMR

```

```

Field Strength = 9.389766[T] (400[MHz])
X_Acq_Duration = 1.04333312[s]
X_Domain       = 13C
X_Freq         = 100.52530333[MHz]
X_Offset       = 100[ppm]
X_Points       = 32768
X_Prescans     = 4
X_Resolution   = 0.95846665[Hz]
X_Sweep        = 31.40703518[kHz]
X_Sweep_Clippped = 25.12562814[kHz]
Irr_Domain     = Proton
Irr_Freq       = 399.78219838[MHz]
Irr_Offset     = 5[ppm]
Clipped        = FALSE
Scans          = 512
Total_Scans    = 512

```

```

Relaxation_Delay = 2[s]
Recvr Gain       = 50
Temp_Get         = 20.1[dC]
X_90_Width      = 9[us]
X_Acq_Time       = 1.04333312[s]
X_Angle          = 30[deg]
X_Atn            = 4.7[dB]
X_Pulse         = 3[us]
Irr_Atn_Dec     = 22.346[dB]
Irr_Atn_No     = 22.346[dB]
Irr_Noise       = WALTZ
Irr_Pwidth      = 0.115[ms]
Decoupling      = TRUE
Initial_Wait     = 1[s]
Noe              = TRUE
Noe Time        = 2[s]
Repetition Time  = 3.04333312[s]

```

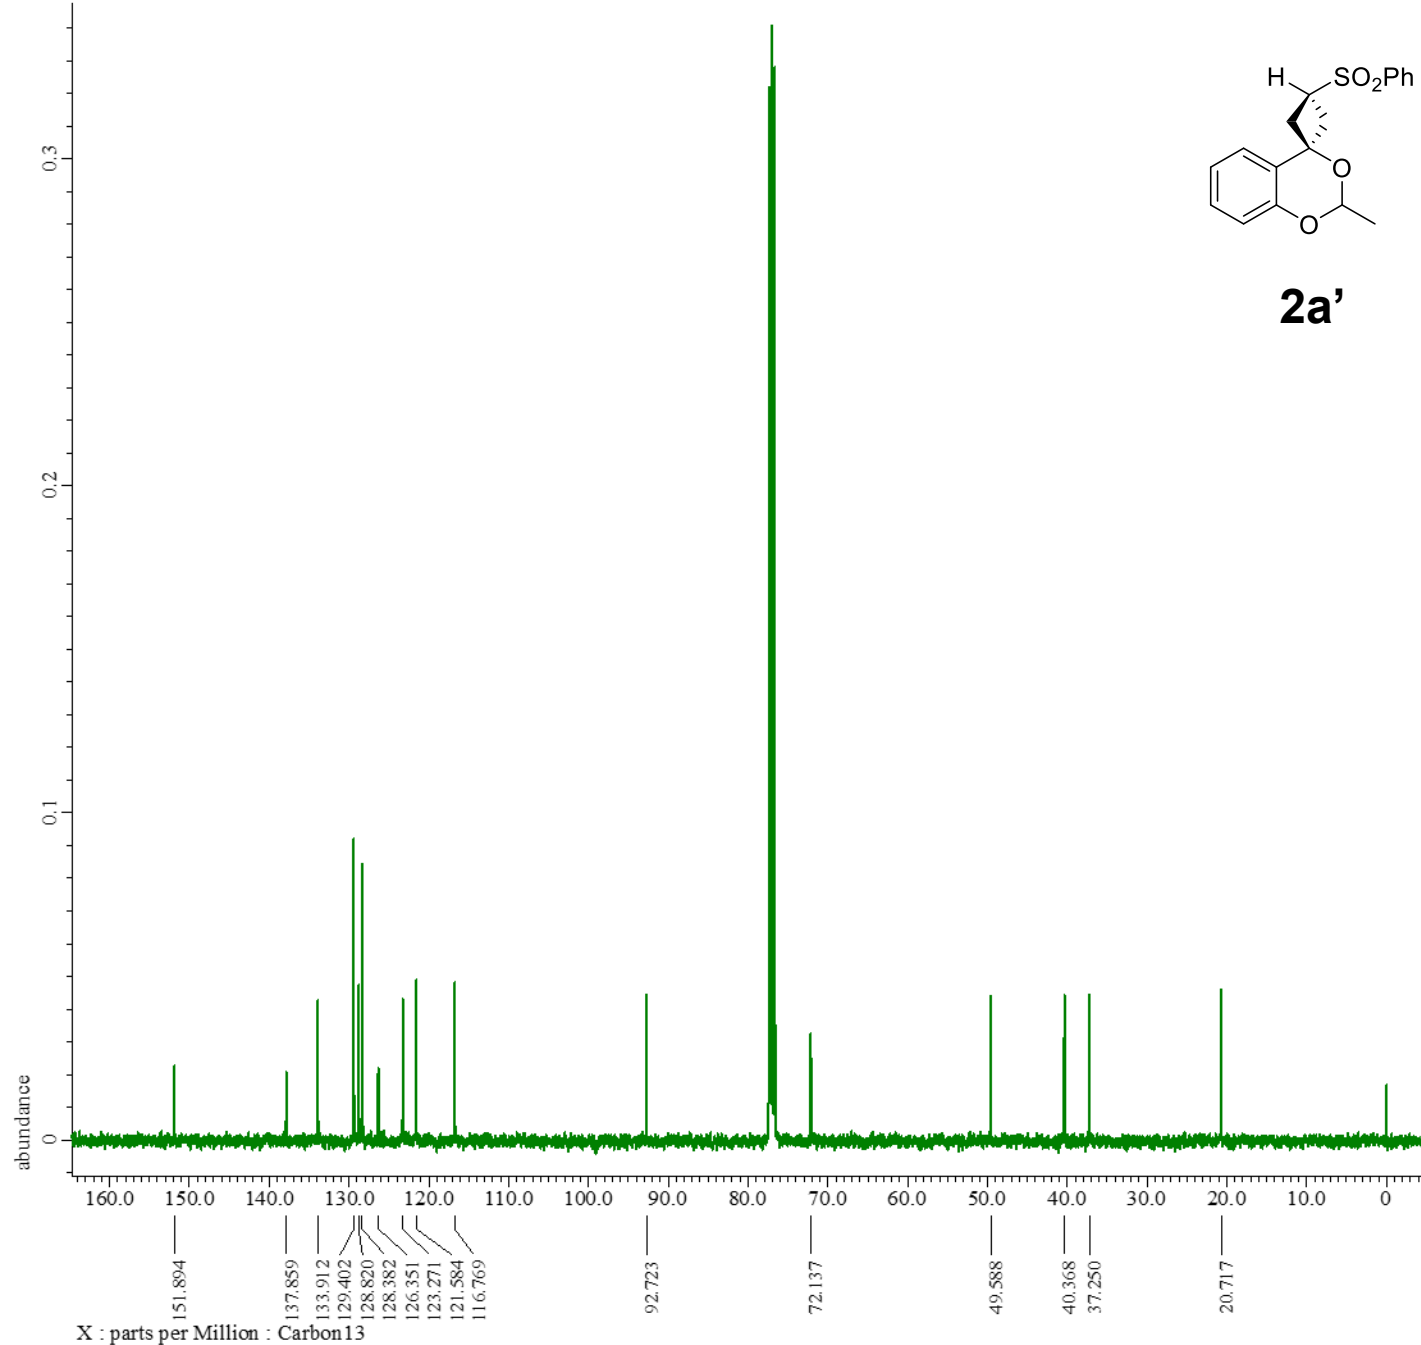

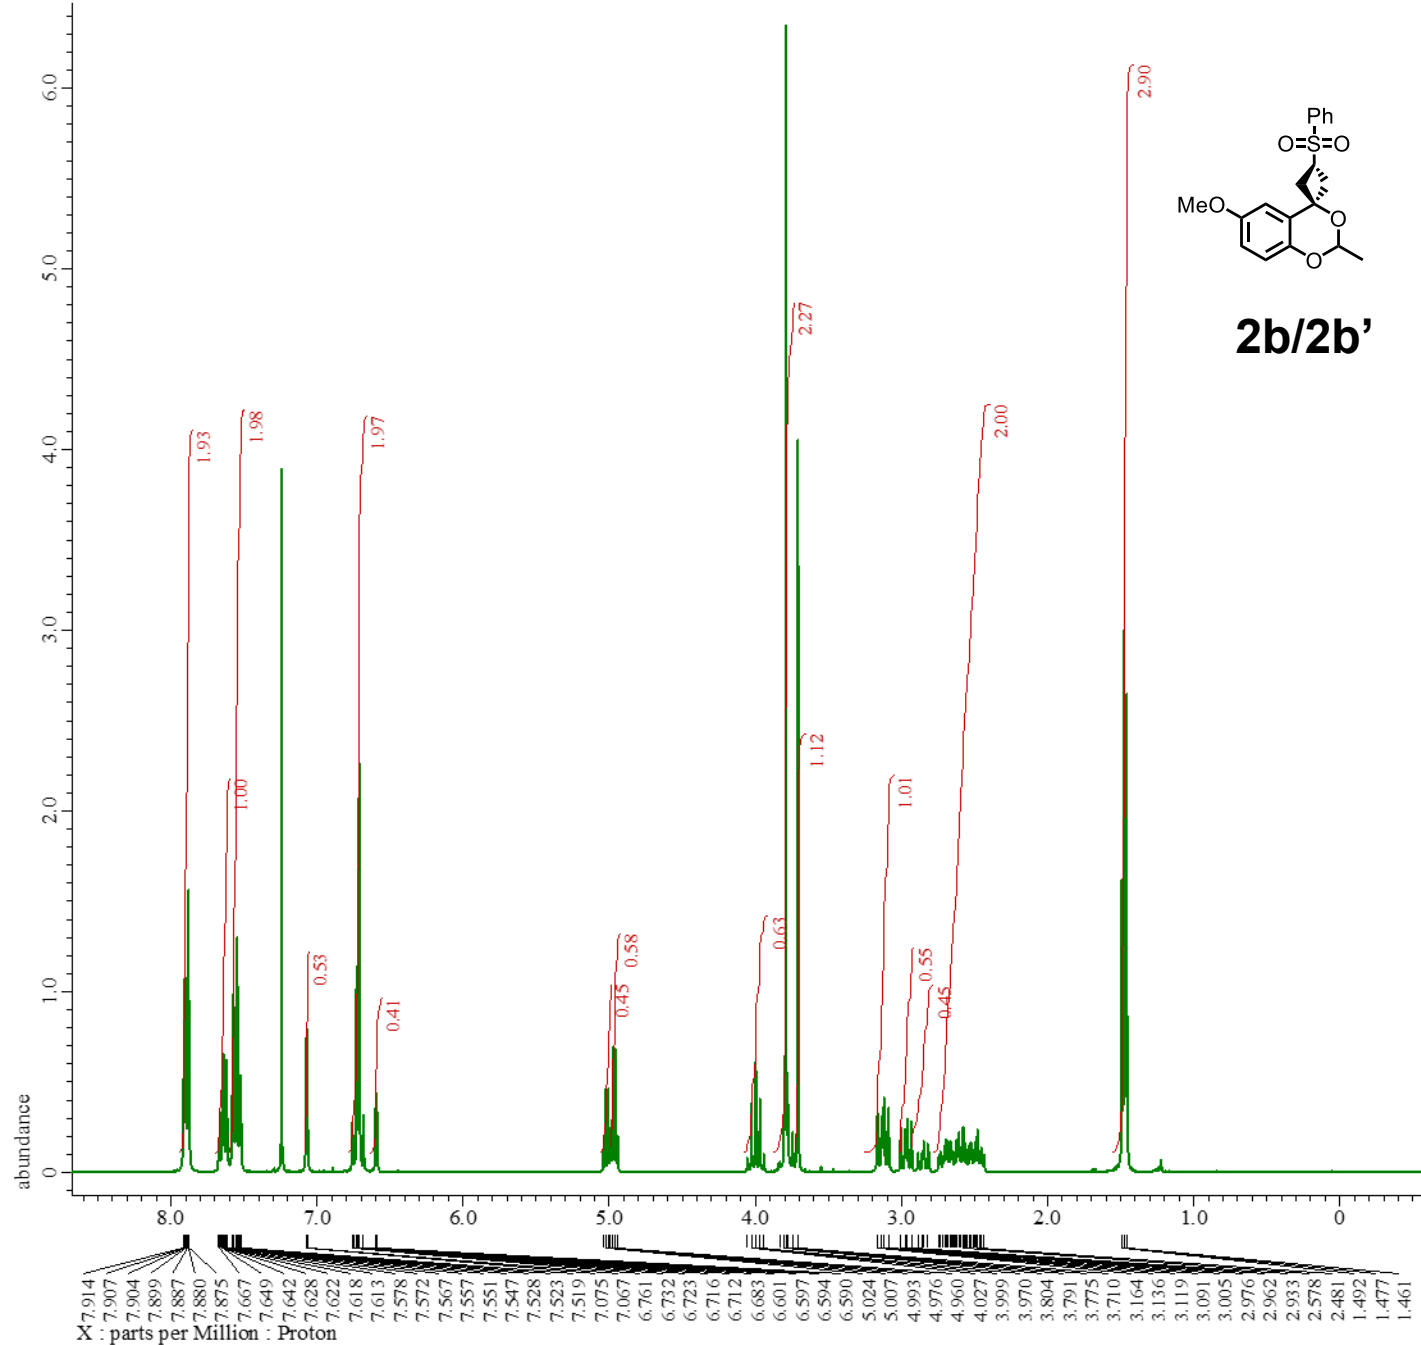

```

---- PROCESSING PARAMETERS ----
dc balance( 0, FALSE )
sexp( 0.2[Hz], 0.0[s] )
trapezoid( 0[8], 0[8], 80[8], 100[8] )
zerofill( 1, TRUE )
fft( 1, TRUE, TRUE )
machinephase
ppm

```

```

Filename      = 12 Ar 4-OMe CDC13_Proton-
Author        = delta
Experiment    = proton.jxp
Sample Id     = 4-OMe PLC CDC13
Solvent       = CHLOROFORM-D
Actual Start Time = 16-DEC-2022 11:42:52
Revision Time  = 16-MAR-2023 11:20:25

```

```

Comment       = single pulse
Data Format    = 1D COMPLEX
Dim Size      = 13107
X_Domain      = Proton
Dim Title     = Proton
Dim Units     = [ppm]
Dimensions    = X
Site          = ECS 300
Spectrometer  = DELTA2_NMR

```

```

Field Strength = 7.0586013[T] (300 [MHz])
X Acq_Duration = 2.90717696 [s]
X_Domain       = 1H
X_Freq         = 300.52965592 [MHz]
X_Offset       = 5 [ppm]
X_Points       = 16384
X_Prescans     = 1
X_Resolution   = 0.34397631 [Hz]
X_Sweep        = 5.63570784 [kHz]
X_Sweep_Clippped = 4.50856628 [kHz]
Irr_Domain     = Proton
Irr_Freq       = 300.52965592 [MHz]
Irr_Offset     = 5 [ppm]
Tri_Domain     = Proton
Tri_Freq       = 300.52965592 [MHz]
Tri_Offset     = 5 [ppm]
Clipped        = FALSE
Scans          = 8
Total_Scans    = 8

```

```

Relaxation_Delay = 5 [s]
Recvr_Gain       = 28
Temp_Get         = 19.8 [dC]
X_90_Width       = 11 [us]
X_Acq_Time       = 2.90717696 [s]
X_Angle          = 45 [deg]
X_Atn           = 1 [dB]
X_Pulse          = 5.5 [us]
Irr_Mode         = Off
Tri_Mode         = Off
Dante_Presat     = FALSE
Initial_Wait     = 1 [s]
Repetition_Time  = 7.90717696 [s]

```

<sup>1</sup>H NMR spectrum of **2b/2b'** (301 MHz, CDCl<sub>3</sub>)

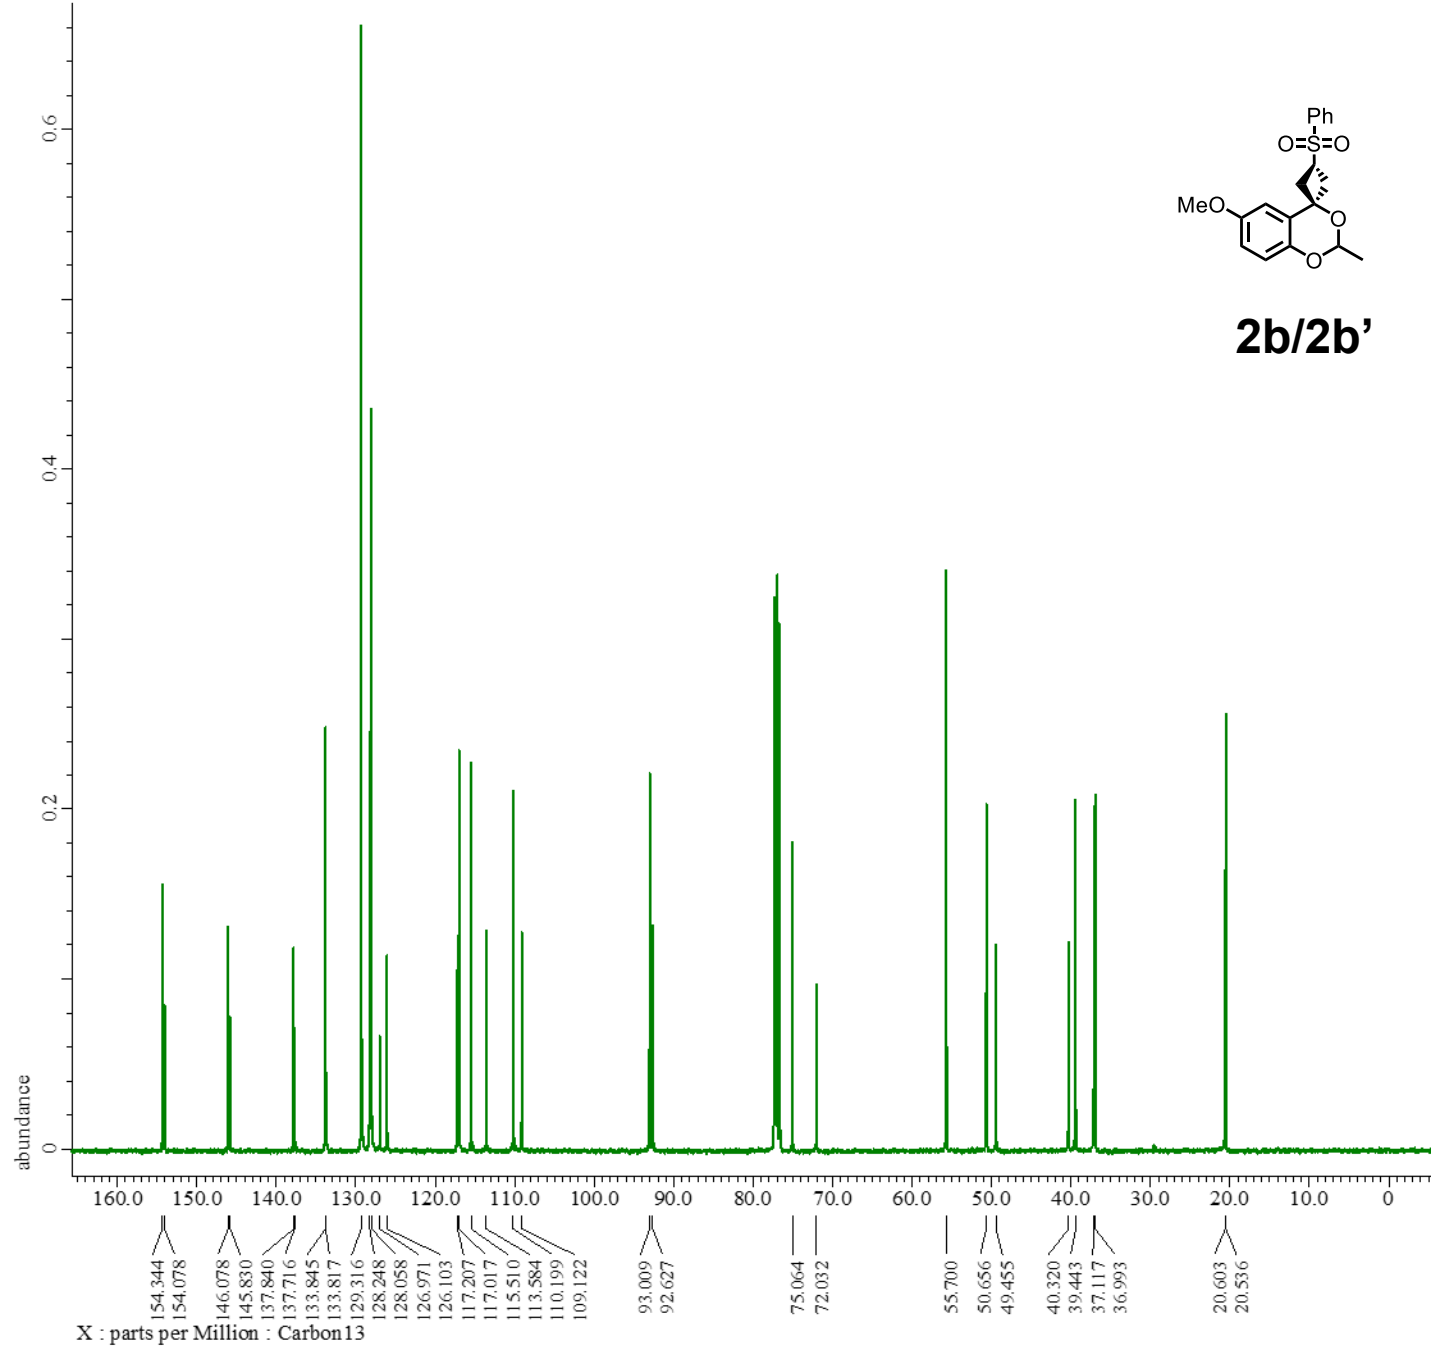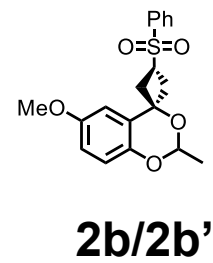

```

---- PROCESSING PARAMETERS ----
dc balance( 0, FALSE )
sexp( 2.0[Hz], 0.0[s] )
trapezoid( 0[8], 0[8], 80[8], 100[8] )
zerofill( 1, TRUE )
fft( 1, TRUE, TRUE )
machinephase
ppm

Filename      = 12 Ar 4-OMe PLC CDC13_Car
Author       = delta
Experiment   = carbon.jxp
Sample Id    = 4-OMe PLC CDC13
Solvent      = CHLOROFORM-D
Actual Start Time = 16-DEC-2022 15:42:44
Revision Time   = 11-JAN-2023 10:01:41

Comment      = single pulse decoupled ga
Data Format   = 1D COMPLEX
Dim Size     = 26214
X_Domain    = Carbon
Dim Title    = Carbon13
Dim Units    = [ppm]
Dimensions   = X
Site         = ECS 400
Spectrometer = DELTA2_NMR

Field Strength = 9.389766[T] (400[MHz])
X_Acq_Duration = 1.04333312[s]
X_Domain      = 13C
X_Freq       = 100.52530333[MHz]
X_Offset     = 100[ppm]
X_Points     = 32768
X_Prescans   = 4
X_Resolution = 0.95846665[Hz]
X_Sweep      = 31.40703518[kHz]
X_Sweep_Clippped = 25.12562814[kHz]
Irr_Domain   = Proton
Irr_Freq     = 399.78219838[MHz]
Irr_Offset   = 5[ppm]
Clipped      = FALSE
Scans        = 1650
Total_Scans  = 1650

Relaxation Delay = 2[s]
Recvr Gain      = 50
Temp_Get       = 21.1[dC]
X_90_Width     = 9[us]
X_Acq_Time     = 1.04333312[s]
X_Angle        = 30[deg]
X_Atn          = 4.7[dB]
X_Pulse        = 3[us]
Irr_Atn_Dec    = 22.346[dB]
Irr_Atn_Noise = 22.346[dB]
Irr_Noise      = WALTZ
Irr_Pwidth     = 0.115[ms]
Decoupling     = TRUE
Initial_Wait   = 1[s]
Noe            = TRUE
Noe_Time       = 2[s]
Repetition Time = 3.04333312[s]

```

<sup>13</sup>C NMR spectrum of **2b/2b'** (101 MHz, CDCl<sub>3</sub>)

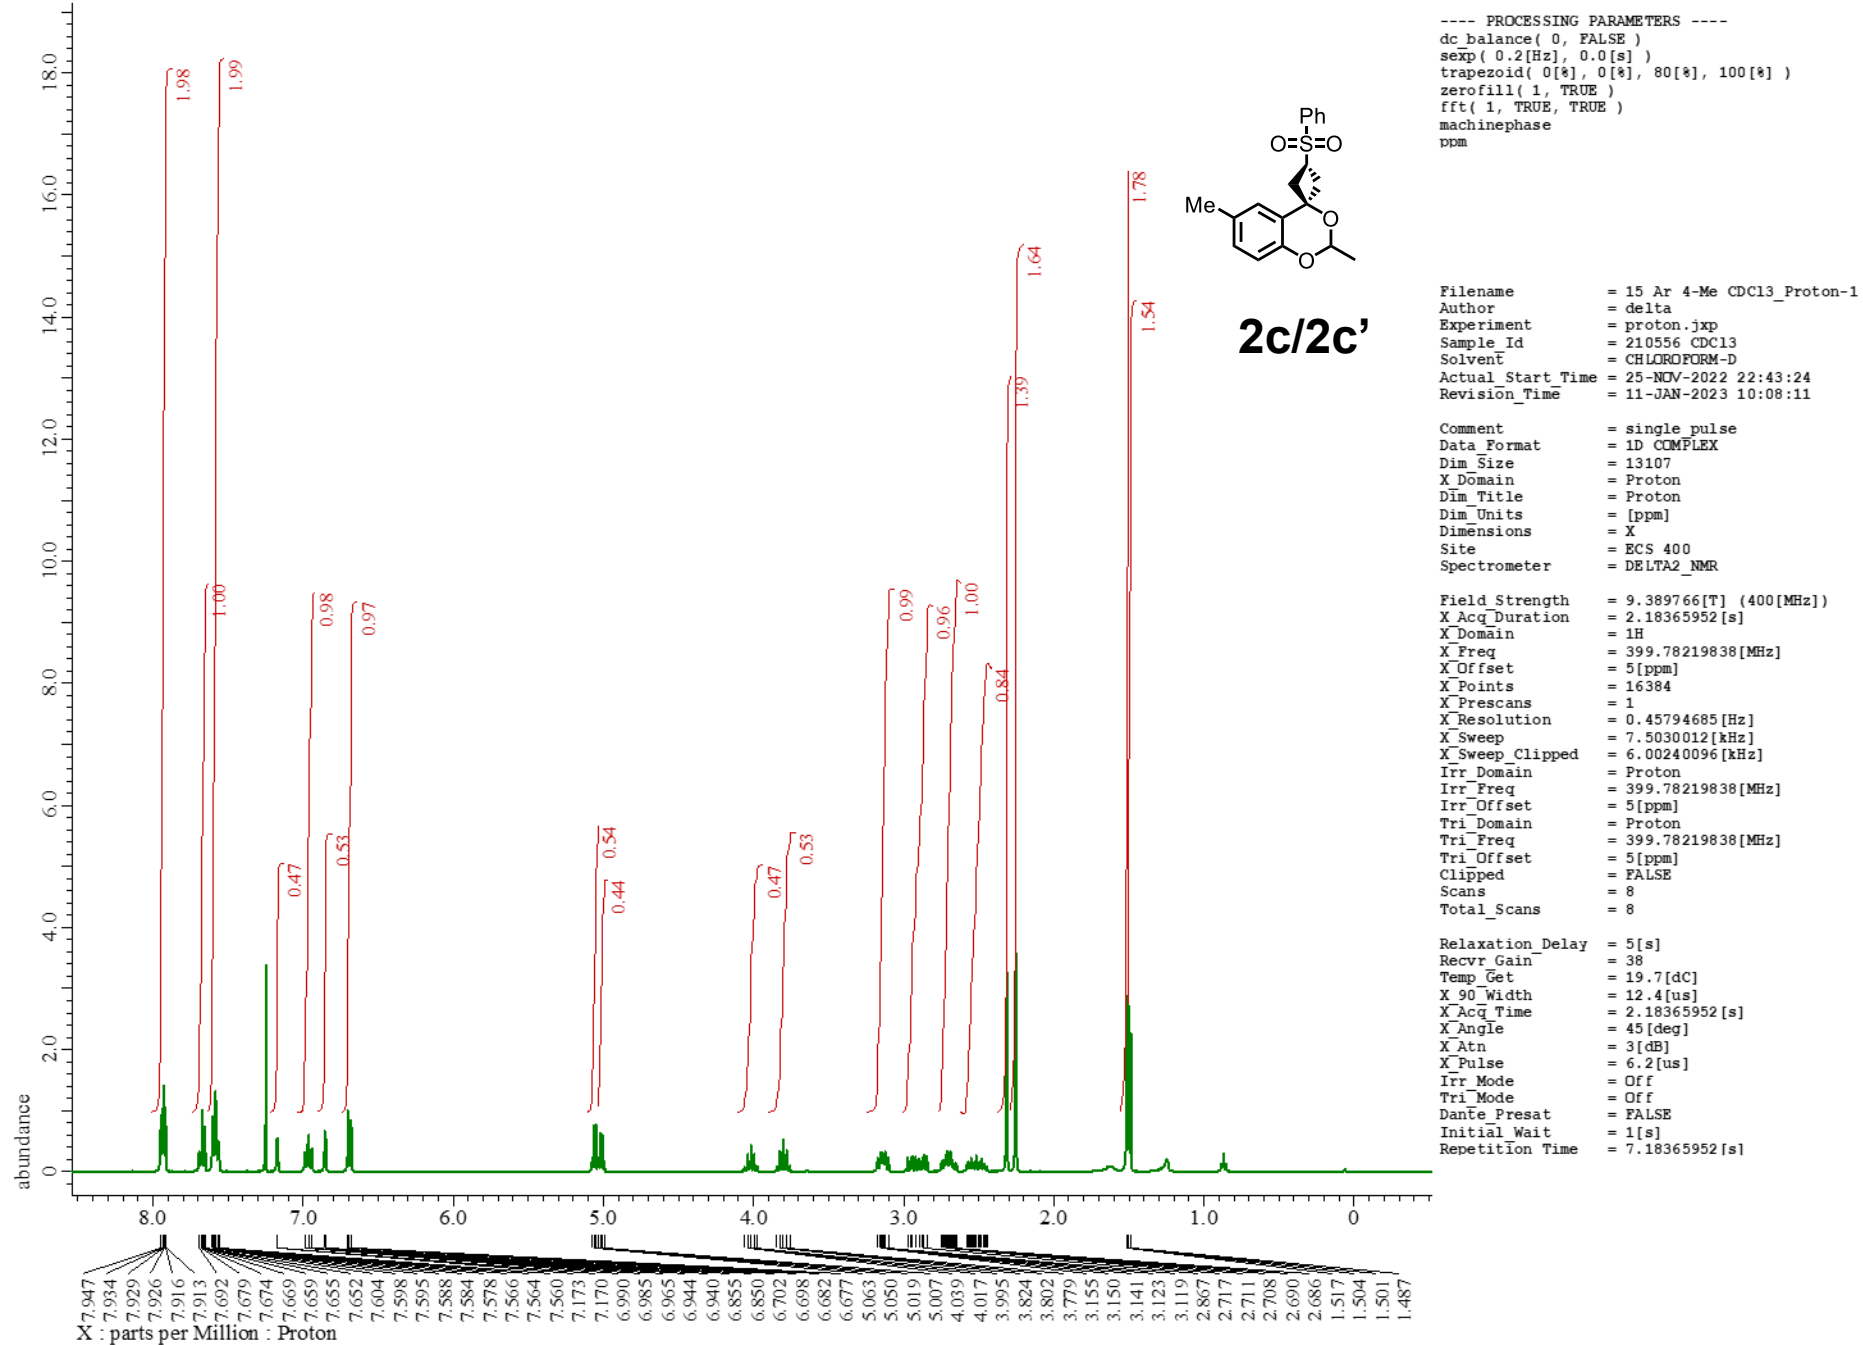

<sup>1</sup>H NMR spectrum of 2c/2c' (400 MHz, CDCl<sub>3</sub>)

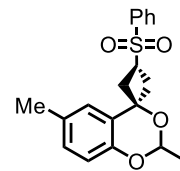

**2c/2c'**

```

---- PROCESSING PARAMETERS ----
dc balance( 0, FALSE )
sexp( 2.0[Hz], 0.0[s] )
trapezoid( 0[8], 0[8], 80[8], 100[8] )
zerofill( 1, TRUE )
fft( 1, TRUE, TRUE )
machinephase
ppm

```

```

Filename      = 15 Ar 4-Me CDC13_Carbon-1
Author        = delta
Experiment     = carbon.jxp
Sample Id      = 210556 3 CDC13
Solvent        = CHLOROFORM-D
Actual Start Time = 16-NOV-2022 03:05:51
Revision Time  = 11-JAN-2023 11:03:31

```

```

Comment       = single pulse decoupled ga
Data Format    = 1D COMPLEX
Dim Size      = 26214
X_Domain      = Carbon
Dim Title     = Carbon13
Dim Units     = [ppm]
Dimensions    = X
Site          = ECS 400
Spectrometer  = DELTA2_NMR

```

```

Field Strength = 9.389766[T] (400[MHz])
X_Acq_Duration = 1.04333312[s]
X_Domain       = 13C
X_Freq         = 100.52530333[MHz]
X_Offset       = 100[ppm]
X Points       = 32768
X_Prescans     = 4
X_Resolution   = 0.95846665[Hz]
X_Sweep        = 31.40703518[kHz]
X_Sweep_Clipped = 25.12562814[kHz]
Irr_Domain     = Proton
Irr_Freq       = 399.78219838[MHz]
Irr_Offset     = 5[ppm]
Clipped        = FALSE
Scans          = 1150
Total_Scans    = 1150

```

```

Relaxation Delay = 2[s]
Recvr Gain       = 50
Temp_Get         = 20[dC]
X_90_Width       = 9[us]
X_Acq_Time       = 1.04333312[s]
X_Angle          = 30[deg]
X_Atn            = 4.7[dB]
X_Pulse          = 3[us]
Irr_Atn_Dec      = 22.346[dB]
Irr_Atn_Noise   = 22.346[dB]
Irr_Noise        = WALTZ
Irr_Pwidth       = 0.115[ms]
Decoupling       = TRUE
Initial_Wait     = 1[s]
Noe               = TRUE
Noe_Time         = 2[s]
Repetition Time  = 3.04333312[s]

```

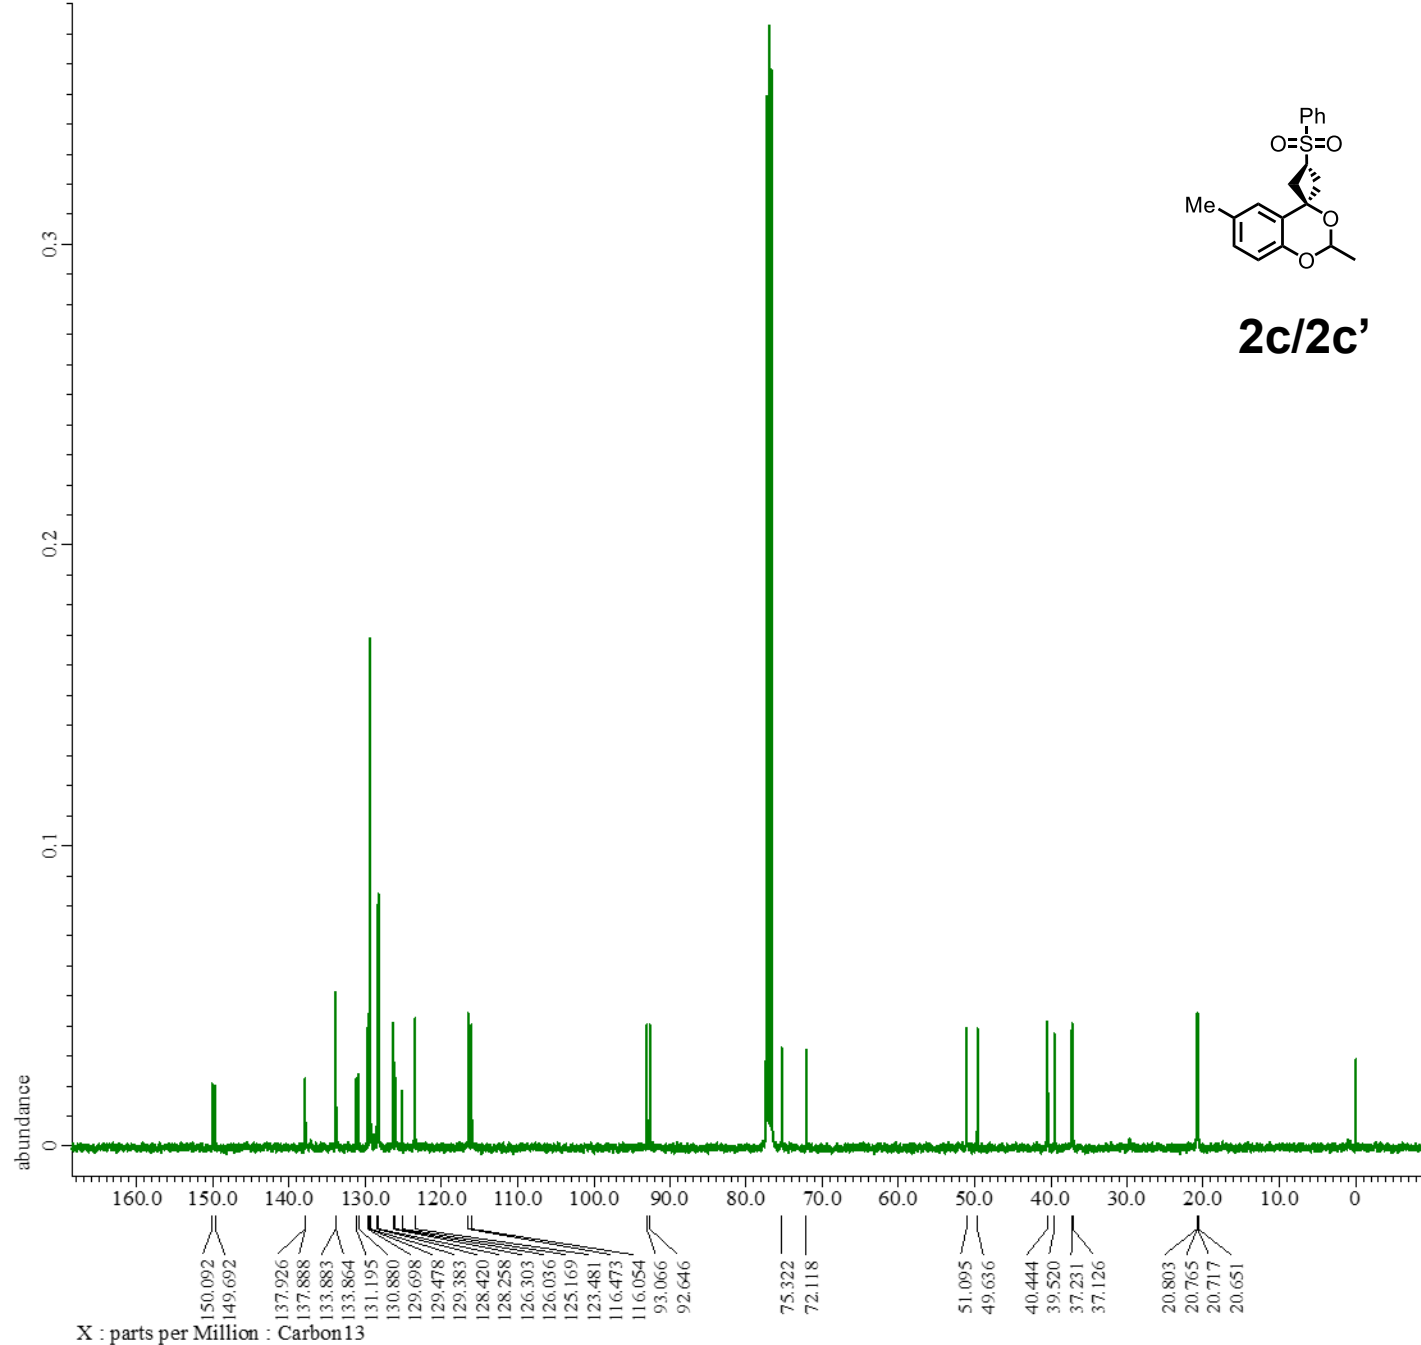



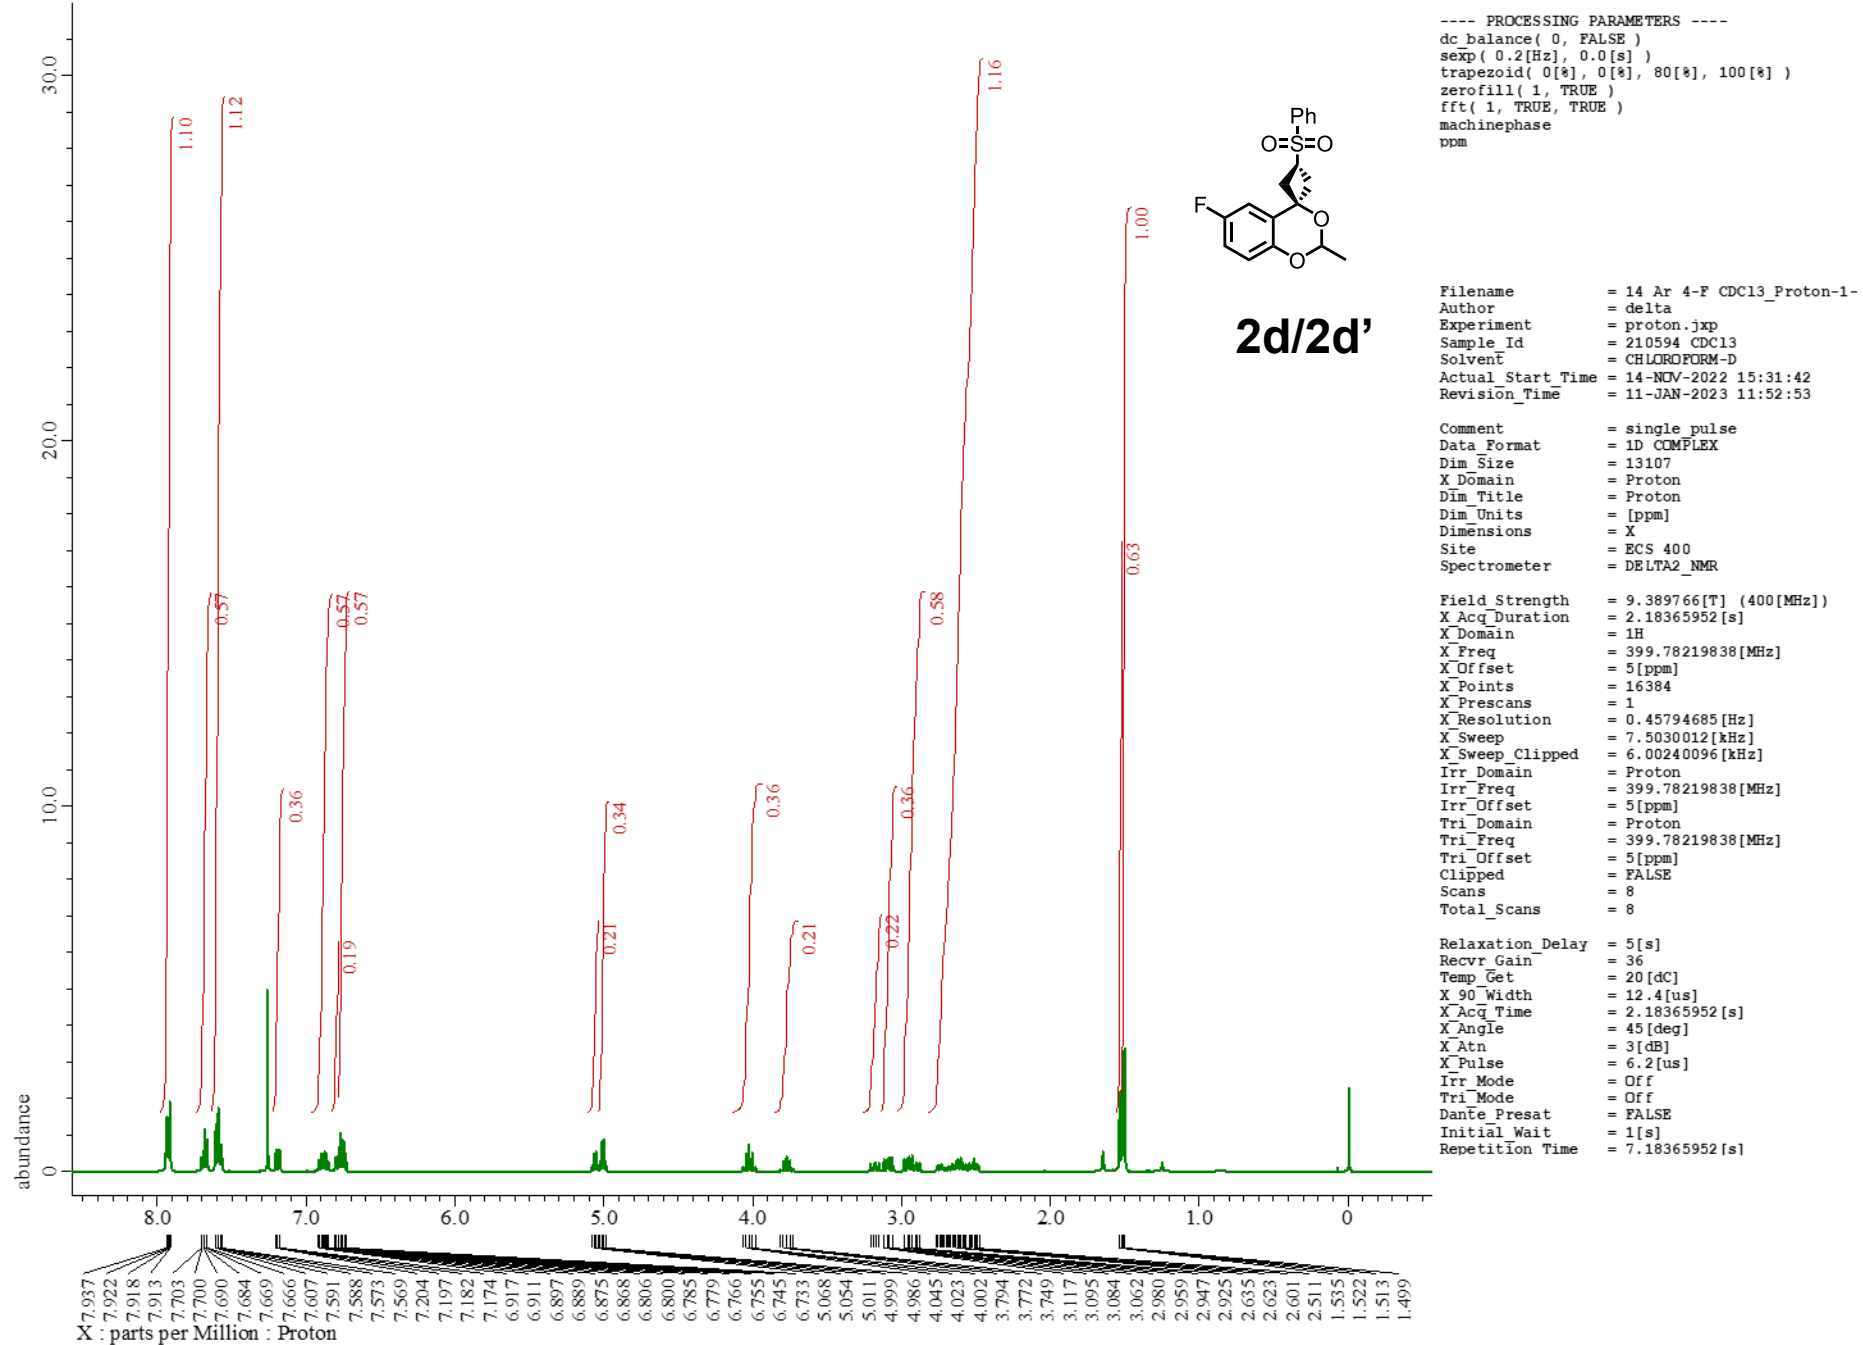

<sup>1</sup>H NMR spectrum of **2d/2d'** (400 MHz, CDCl<sub>3</sub>)

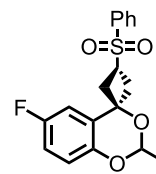

**2d/2d'**

```

---- PROCESSING PARAMETERS ----
dc balance( 0, FALSE )
sexp( 2.0[Hz], 0.0[s] )
trapezoid( 0[8], 0[8], 80[8], 100[8] )
zerofill( 1, TRUE )
fft( 1, TRUE, TRUE )
machinephase
ppm

```

```

Filename      = 14 Ar 4-F CDC13_Carbon-1-
Author       = delta
Experiment    = carbon.jxp
Sample Id     = 210594 2 CDC13
Solvent       = CHLOROFORM-D
Actual Start Time = 16-NOV-2022 08:30:16
Revision Time  = 16-MAR-2023 11:58:52

```

```

Comment      = single pulse decoupled ga
Data Format   = 1D COMPLEX
Dim Size     = 26214
X_Domain     = Carbon
Dim Title    = Carbon13
Dim Units    = [ppm]
Dimensions   = X
Site         = ECS 400
Spectrometer = DELTA2_NMR

```

```

Field Strength = 9.389766[T] (400[MHz])
X_Acq_Duration = 1.04333312[s]
X_Domain       = 13C
X_Freq         = 100.52530333[MHz]
X_Offset       = 100[ppm]
X Points       = 32768
X_Prescans     = 4
X_Resolution   = 0.95846665[Hz]
X_Sweep        = 31.40703518[kHz]
X_Sweep_Clippped = 25.12562814[kHz]
Irr_Domain     = Proton
Irr_Freq       = 399.78219838[MHz]
Irr_Offset     = 5[ppm]
Clipped        = FALSE
Scans          = 1150
Total_Scans    = 1150

```

```

Relaxation_Delay = 2[s]
Recvr Gain       = 50
Temp_Get         = 20.1[dC]
X_90_Width      = 9[us]
X_Acq_Time       = 1.04333312[s]
X_Angle          = 30[deg]
X_Atn            = 4.7[dB]
X_Pulse          = 3[us]
Irr_Atn_Dec      = 22.346[dB]
Irr_Atn_Noise    = 22.346[dB]
Irr_Noise        = WALTZ
Irr_Pwidth       = 0.115[ms]
Decoupling       = TRUE
Initial_Wait     = 1[s]
Noe               = TRUE
Noe Time         = 2[s]
Repetition Time  = 3.04333312[s]

```

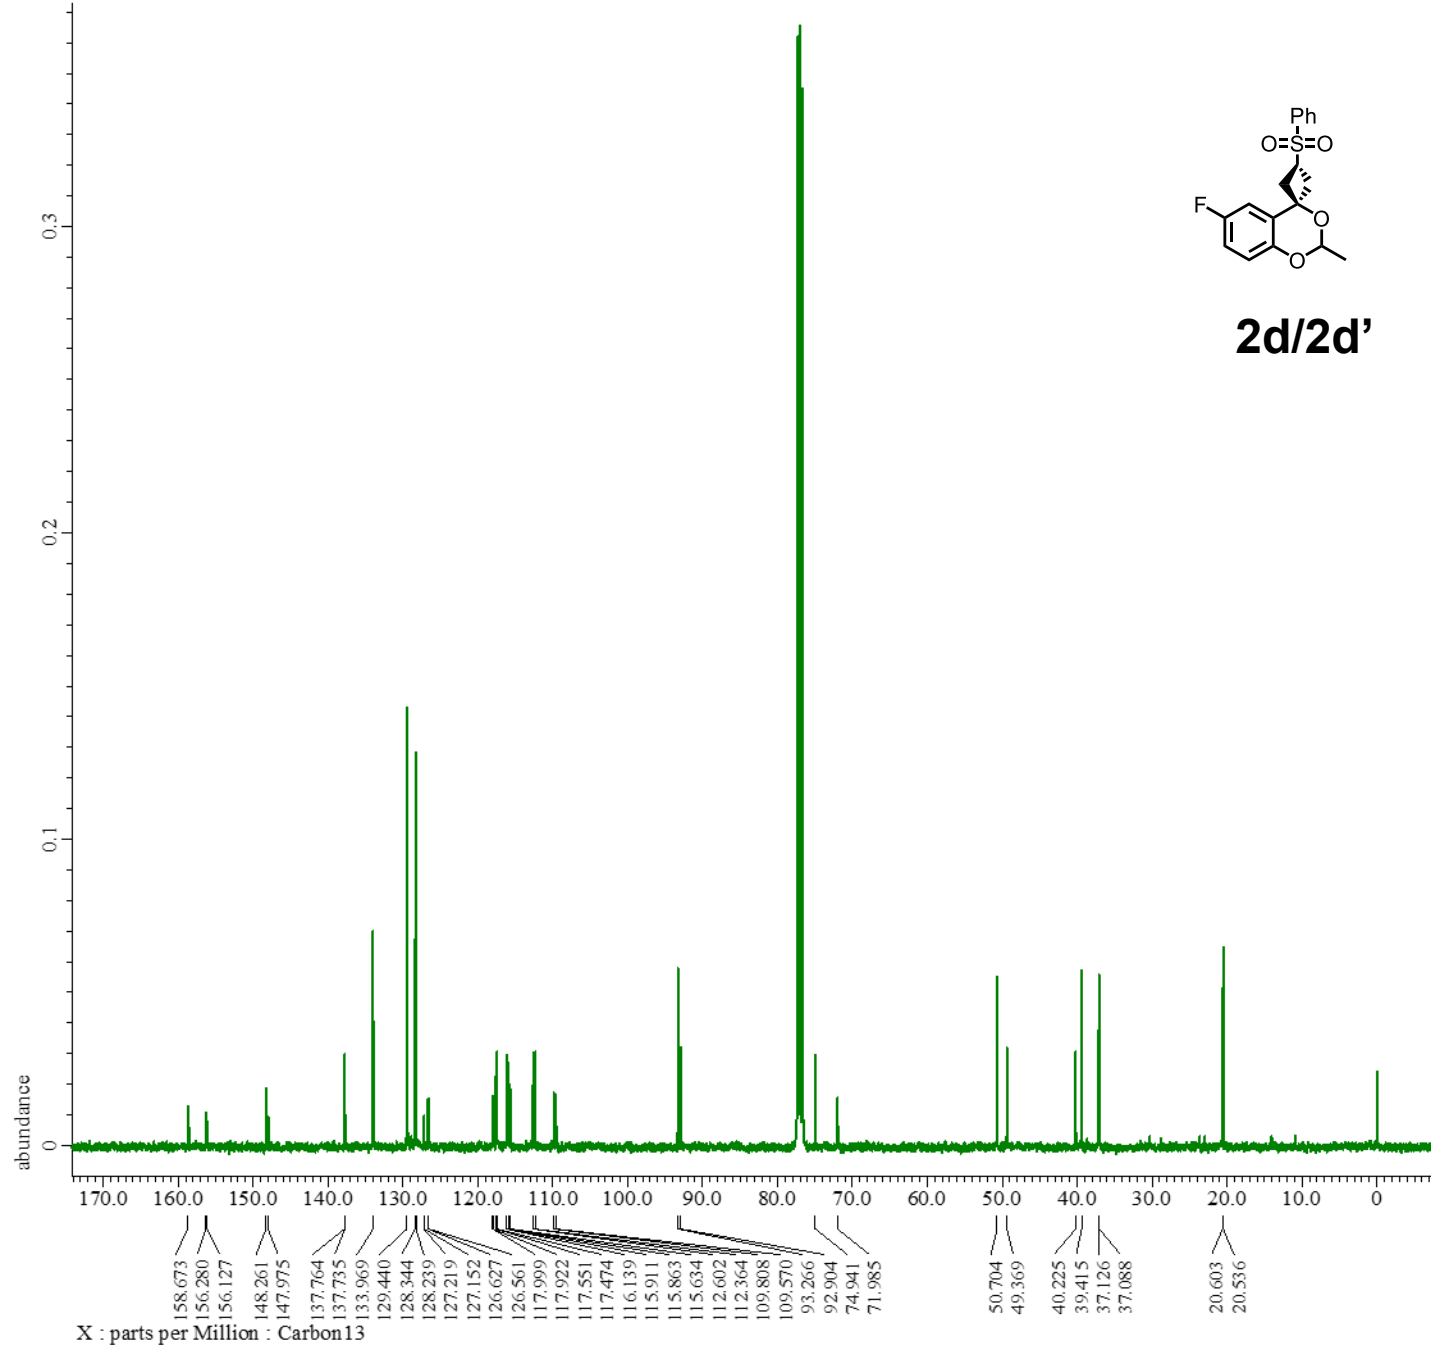

X : parts per Million : Carbon13

<sup>13</sup>C NMR spectrum of **2d/2d'** (101 MHz, CDCl<sub>3</sub>)

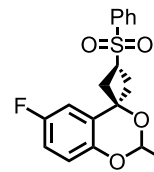

**2d/2d'**

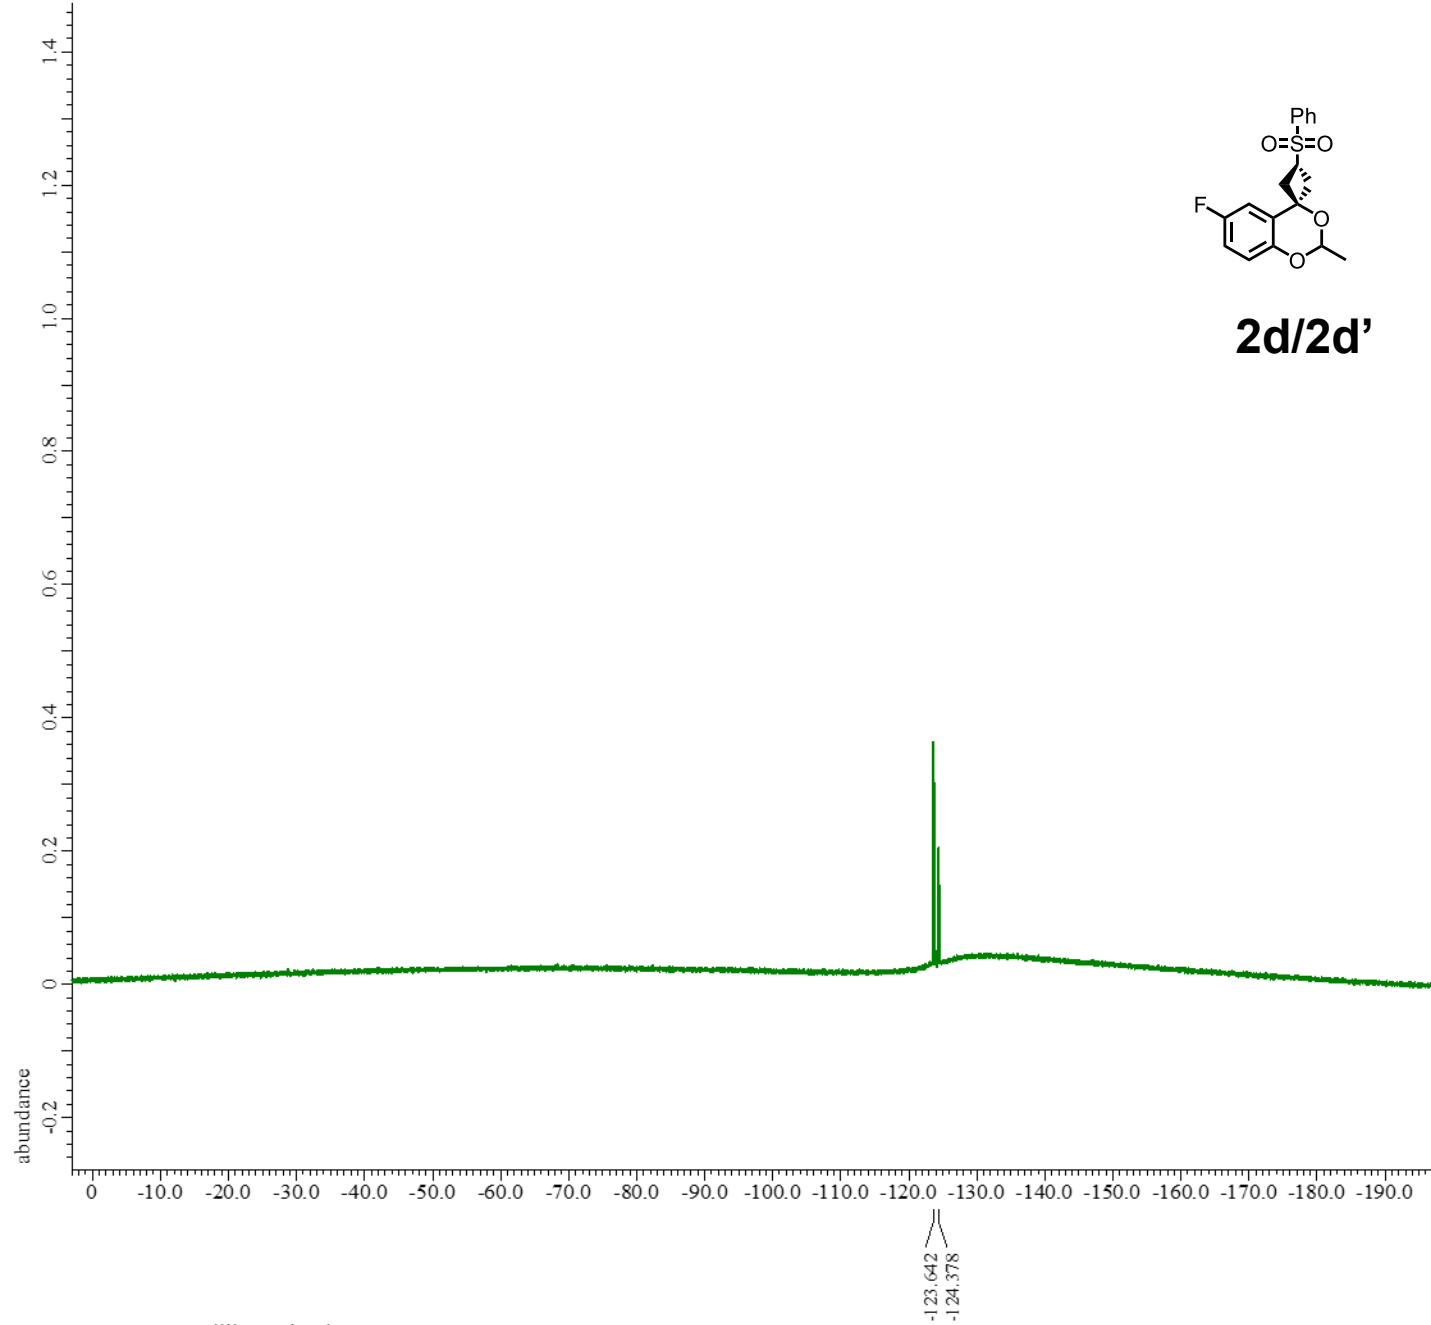

```

---- PROCESSING PARAMETERS ----
dc balance( 0, FALSE )
sexp( 0.2[Hz], 0.0[s] )
trapezoid( 0[8], 0[8], 80[8], 100[8] )
zerofill( 1, TRUE )
fft( 1, TRUE, TRUE )
machinephase
ppm

Filename           = 14 Ar 4-F CDC13-4.jdf
Author             = delta
Experiment         = single_pulse.jxp
Sample Id          = 210664-665 column CDC13
Solvent            = CHLOROFORM-D
Actual Start Time  = 22-DEC-2022 10:23:58
Revision Time      = 17-MAR-2023 16:50:43

Comment           = single pulse
Data Format        = 1D COMPLEX
Dim Size          = 13107
X_Domain          = Fluori
Dim Title         = Fluorine19
Dim Units         = [ppm]
Dimensions        = X
Site              = ECS 300
Spectrometer      = DELTA2_NMR

Field Strength    = 7.0586013[T] (300 [MHz])
X Acq_Duration    = 0.15368192 [s]
X_Domain          = 19F
X Freq            = 282.78036857 [MHz]
X_Offset          = -80 [ppm]
X Points          = 16384
X_Prescans        = 1
X_Resolution      = 6.5069463 [Hz]
X Sweep           = 106.6098081 [kHz]
X Sweep_Clippped = 85.28784648 [kHz]
Irr_Domain        = Fluorine19
Irr_Freq          = 282.78036857 [MHz]
Irr_Offset        = 5 [ppm]
Tri_Domain        = Fluorine19
Tri_Freq          = 282.78036857 [MHz]
Tri_Offset        = 5 [ppm]
Clipped           = FALSE
Scans             = 16
Total_Scans       = 16

Relaxation Delay  = 5 [s]
Recvr Gain        = 32
Temp_Get          = 18.9 [dC]
X_90_Width        = 12 [us]
X_Acq Time        = 0.15368192 [s]
X_Angle           = 45 [deg]
X_Atn             = 2.8 [dB]
X_Pulse           = 6 [us]
Irr Mode          = Off
Tri Mode          = Off
DanTe Presat      = FALSE
Initial Wait      = 1 [s]
Repetition Time   = 5.15368192 [s]

```

X : parts per Million : Fluorine19

-123.642  
-124.378

**S67**

<sup>19</sup>F NMR spectrum of **2d/2d'** (283 MHz, CDCl<sub>3</sub>)

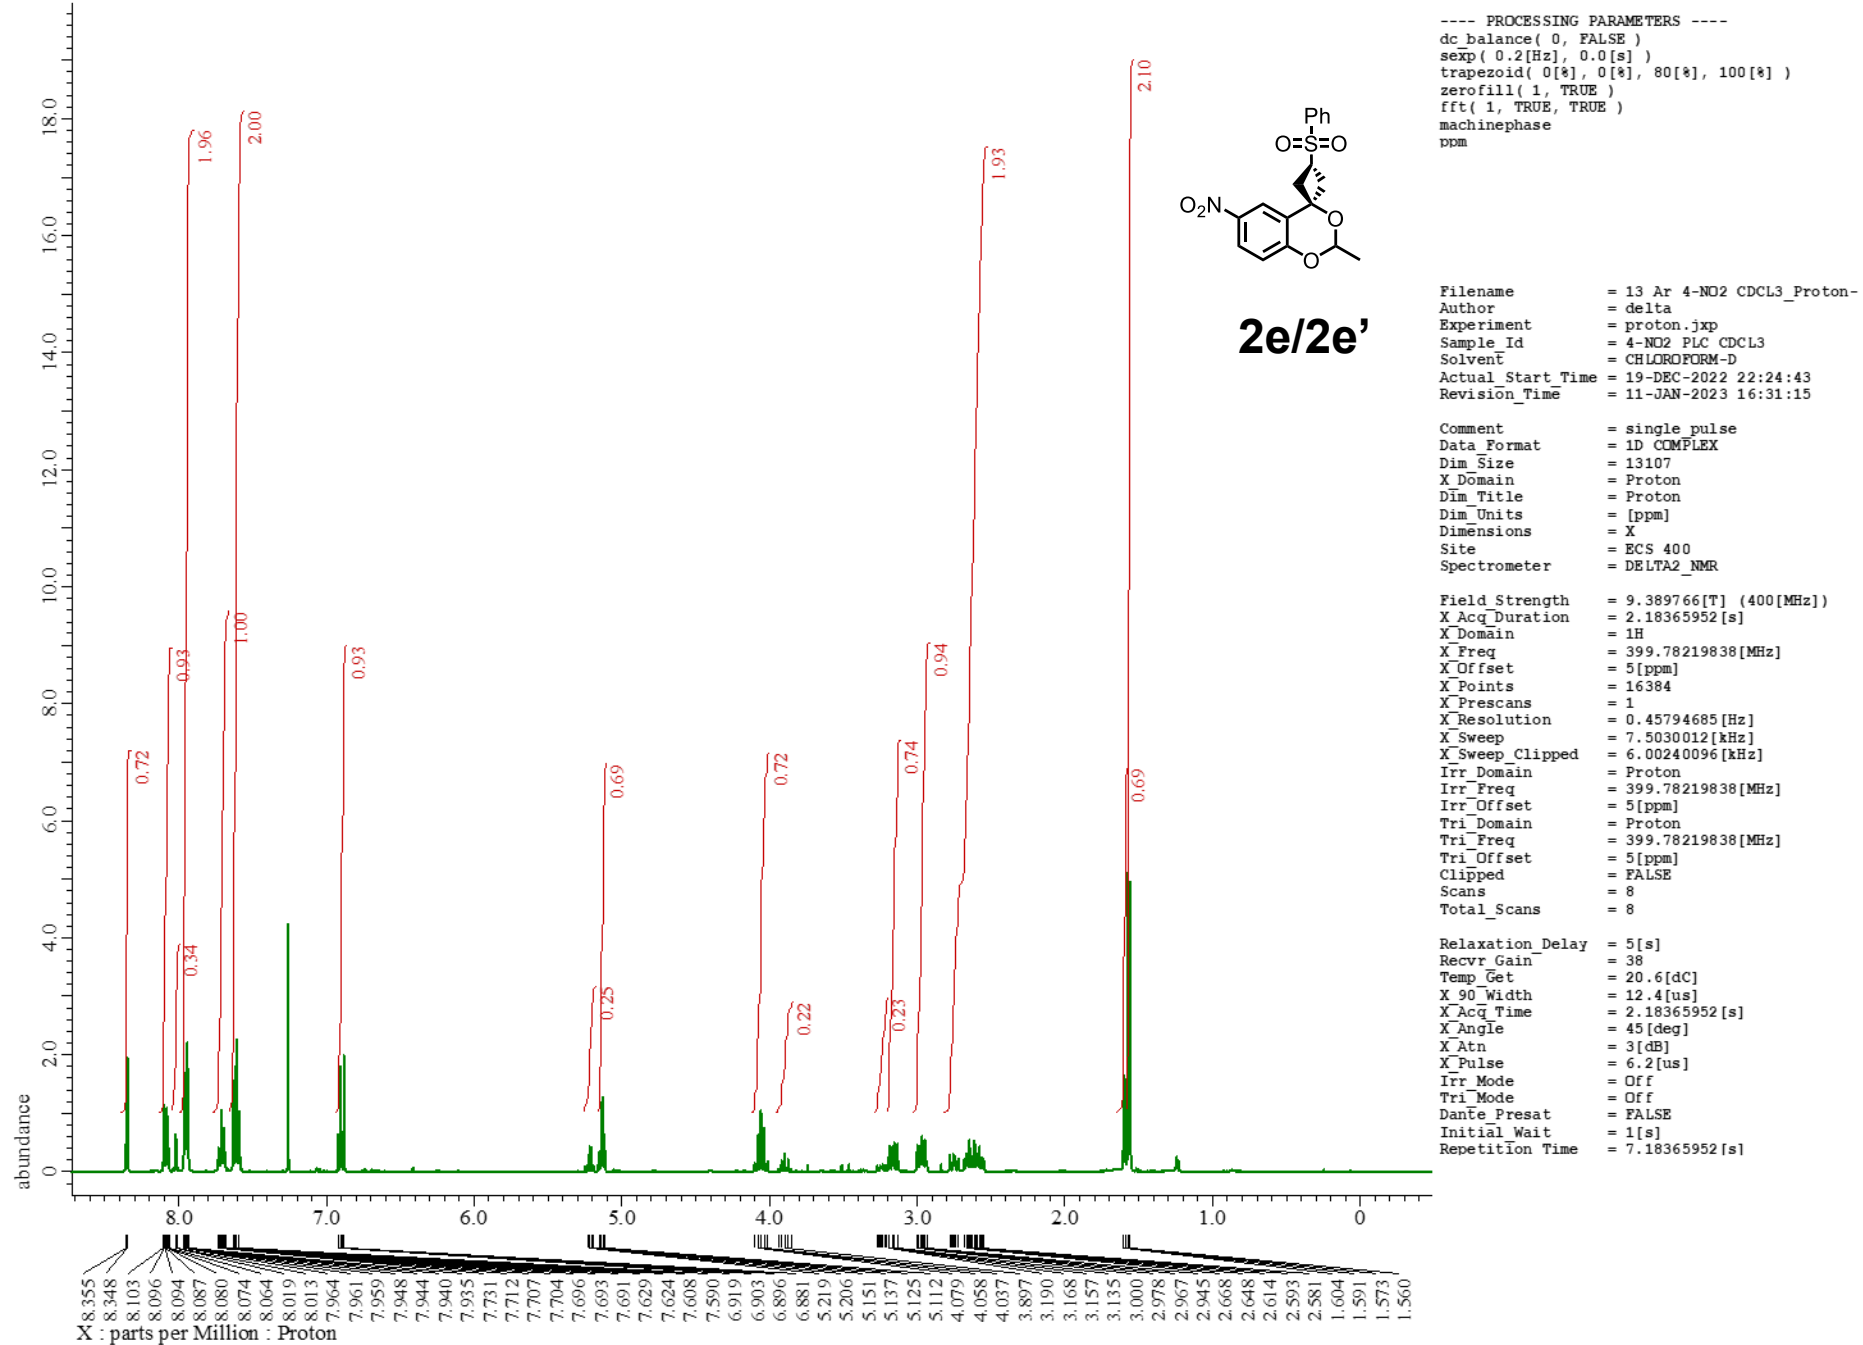

<sup>1</sup>H NMR spectrum of **2e/2e'** (400 MHz, CDCl<sub>3</sub>)

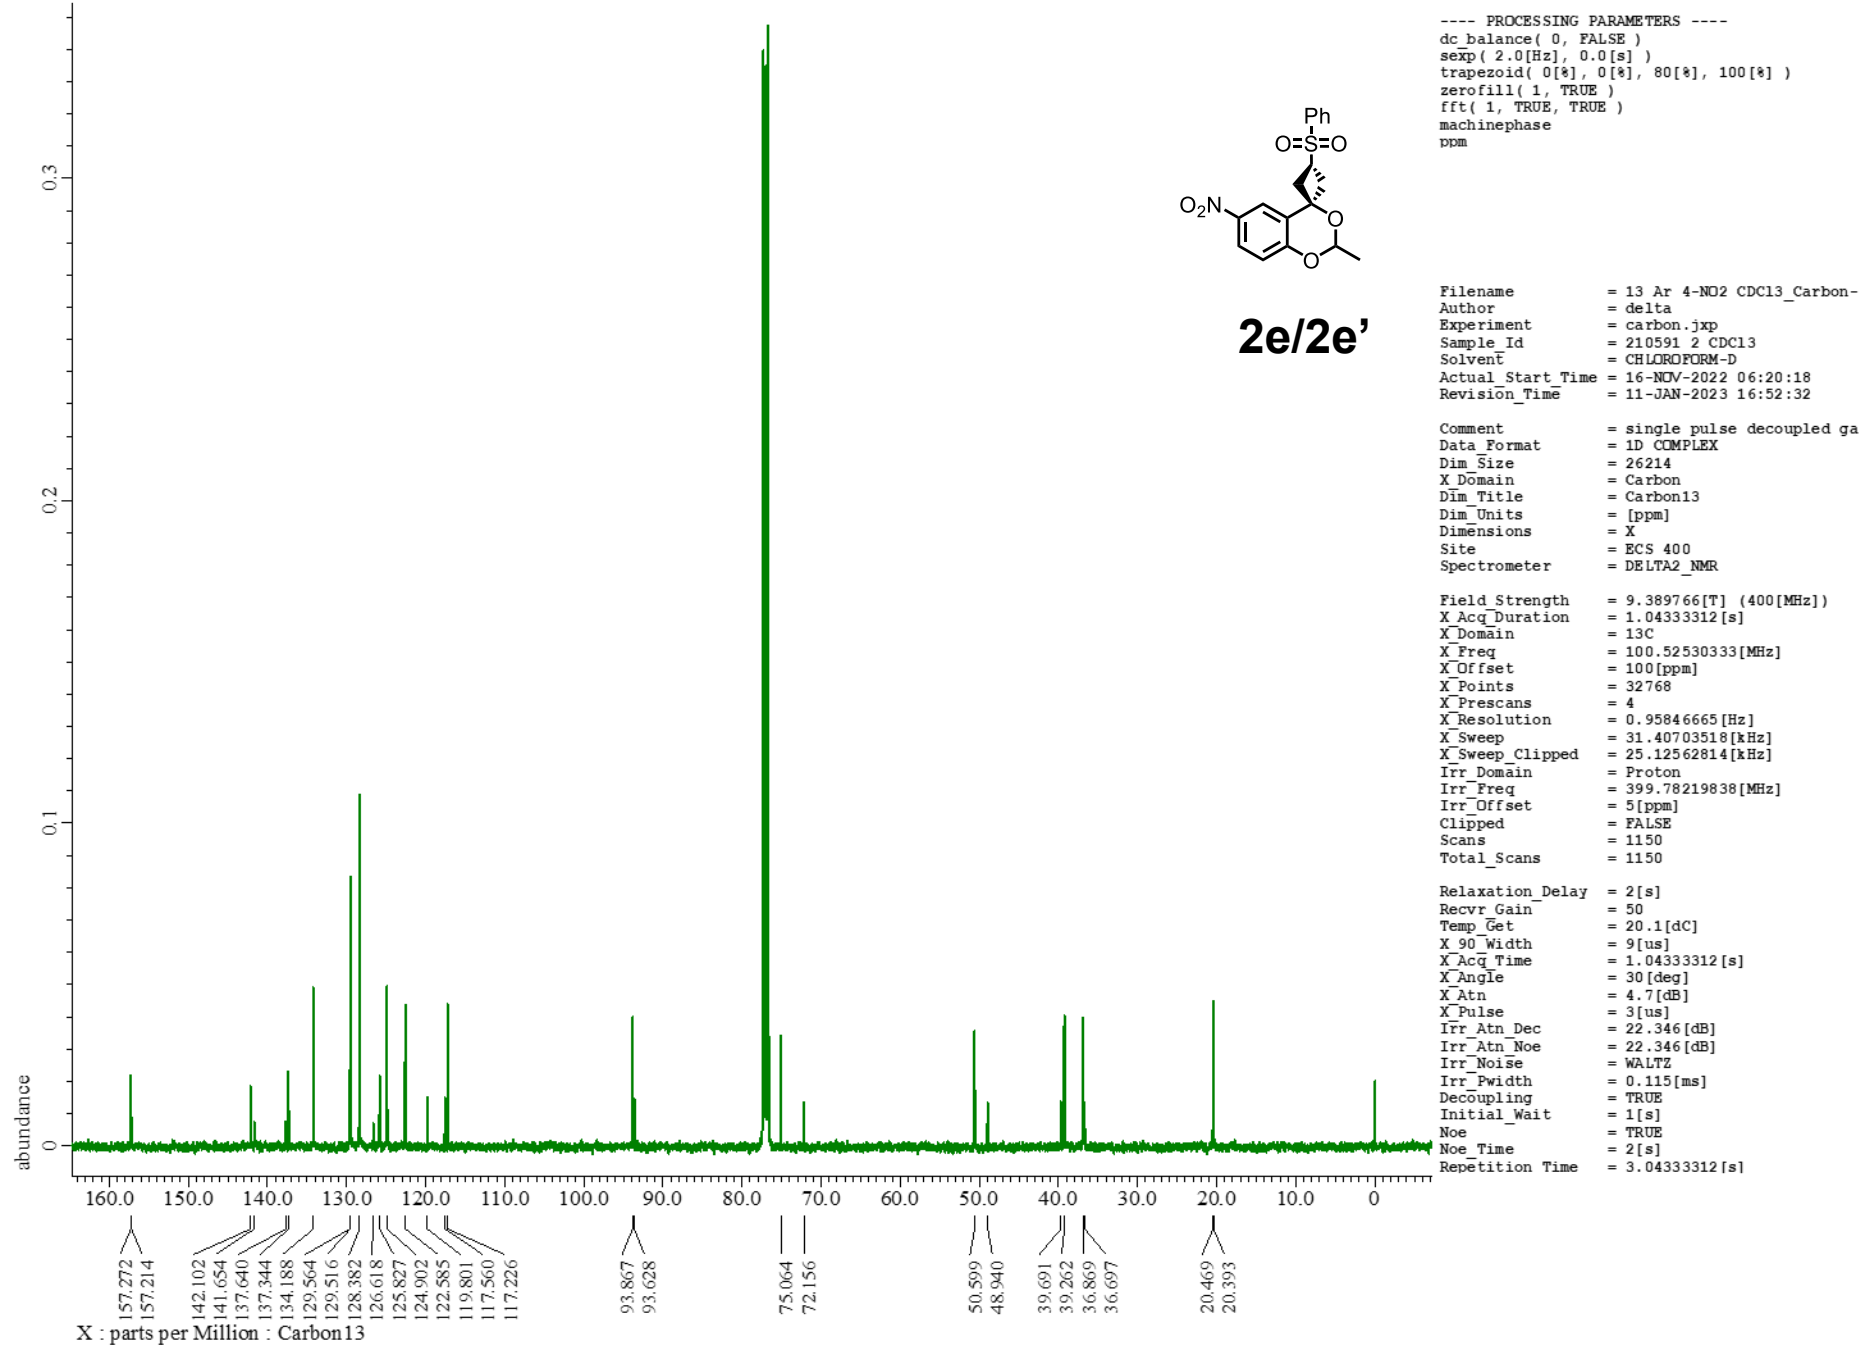

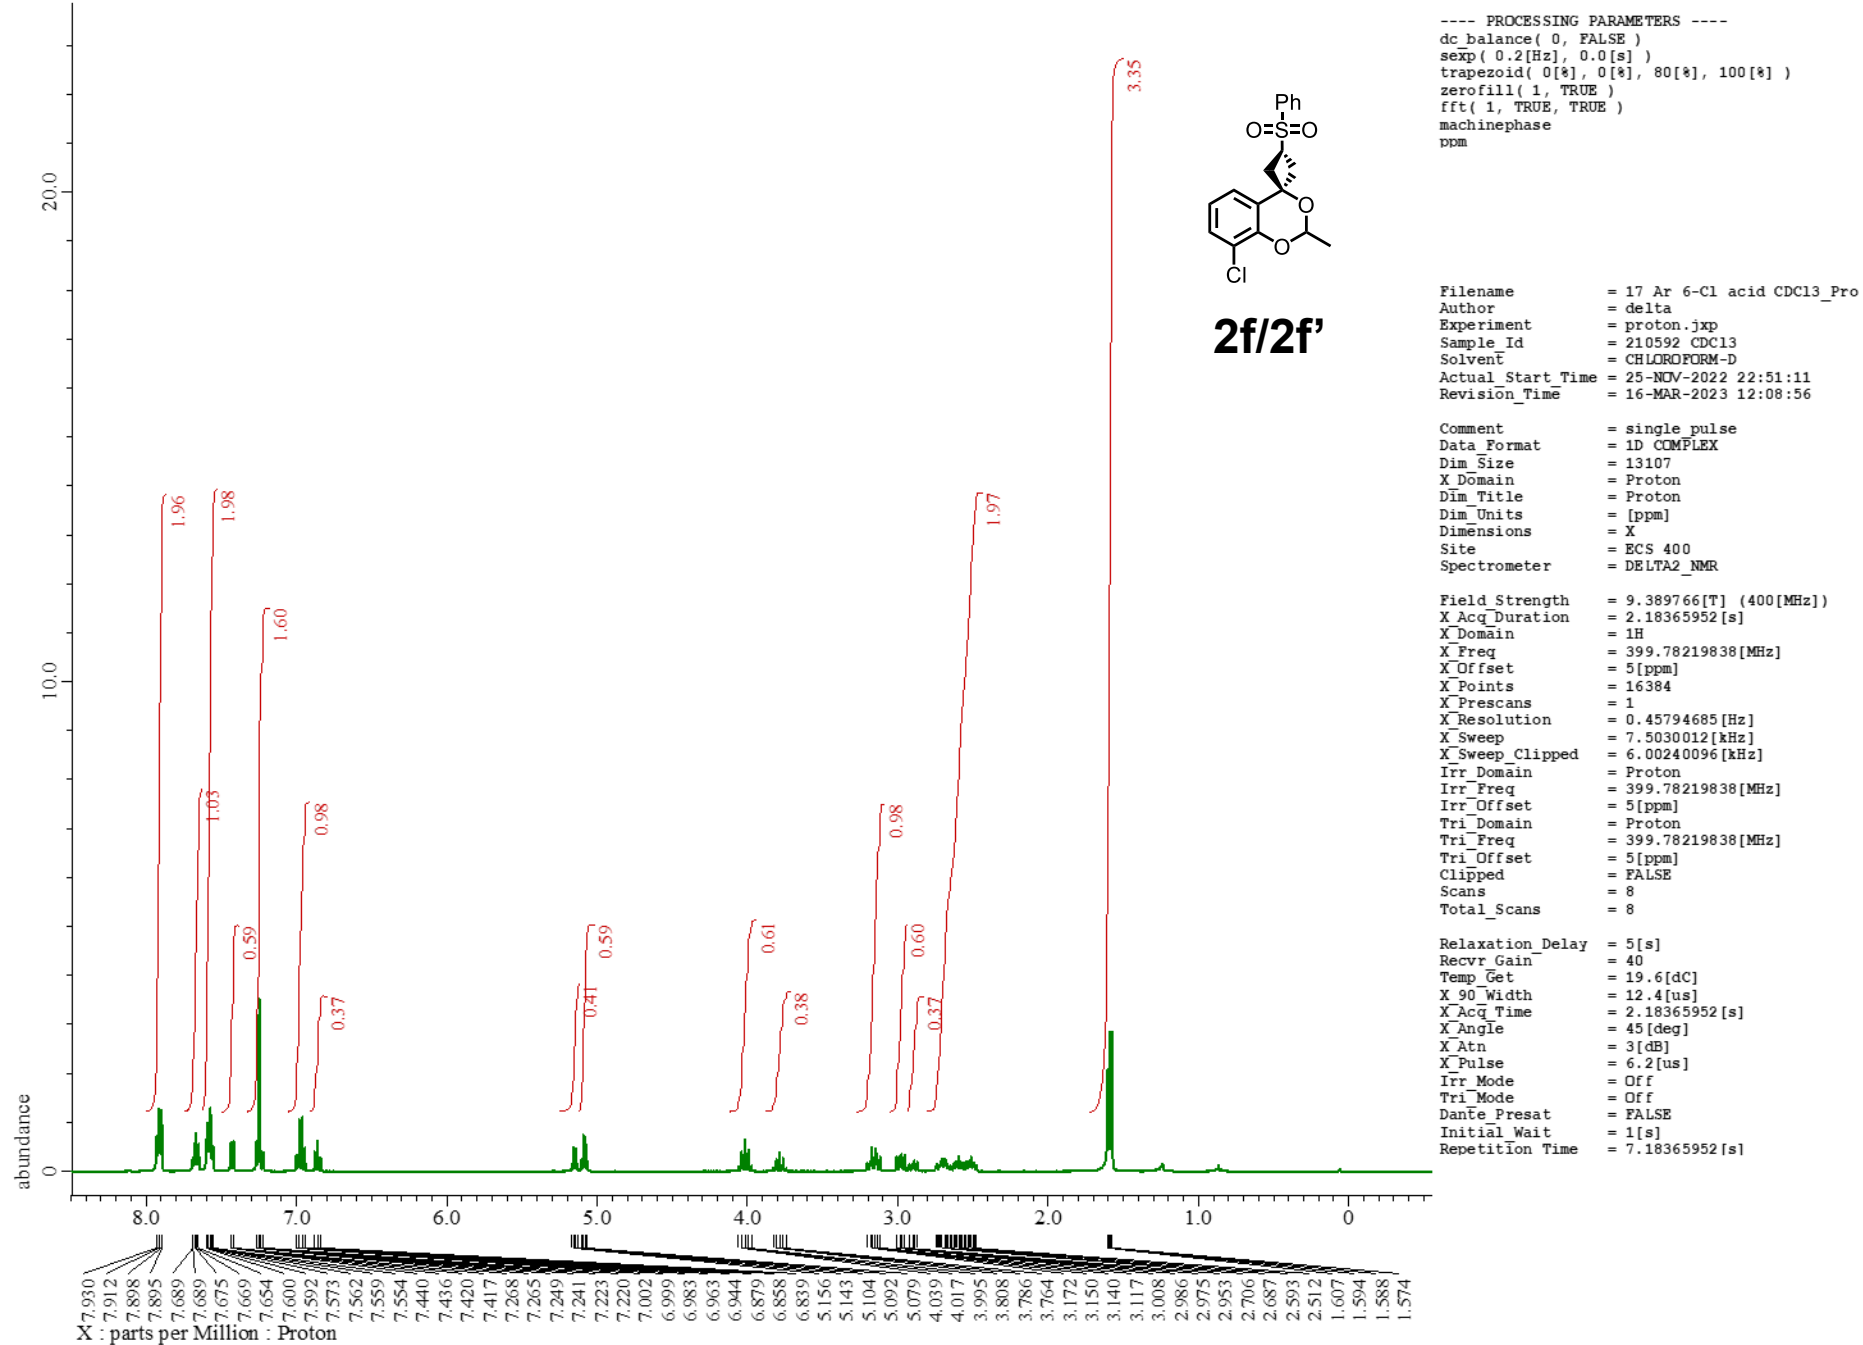

<sup>1</sup>H NMR spectrum of **2f/2f'** (400 MHz, CDCl<sub>3</sub>)

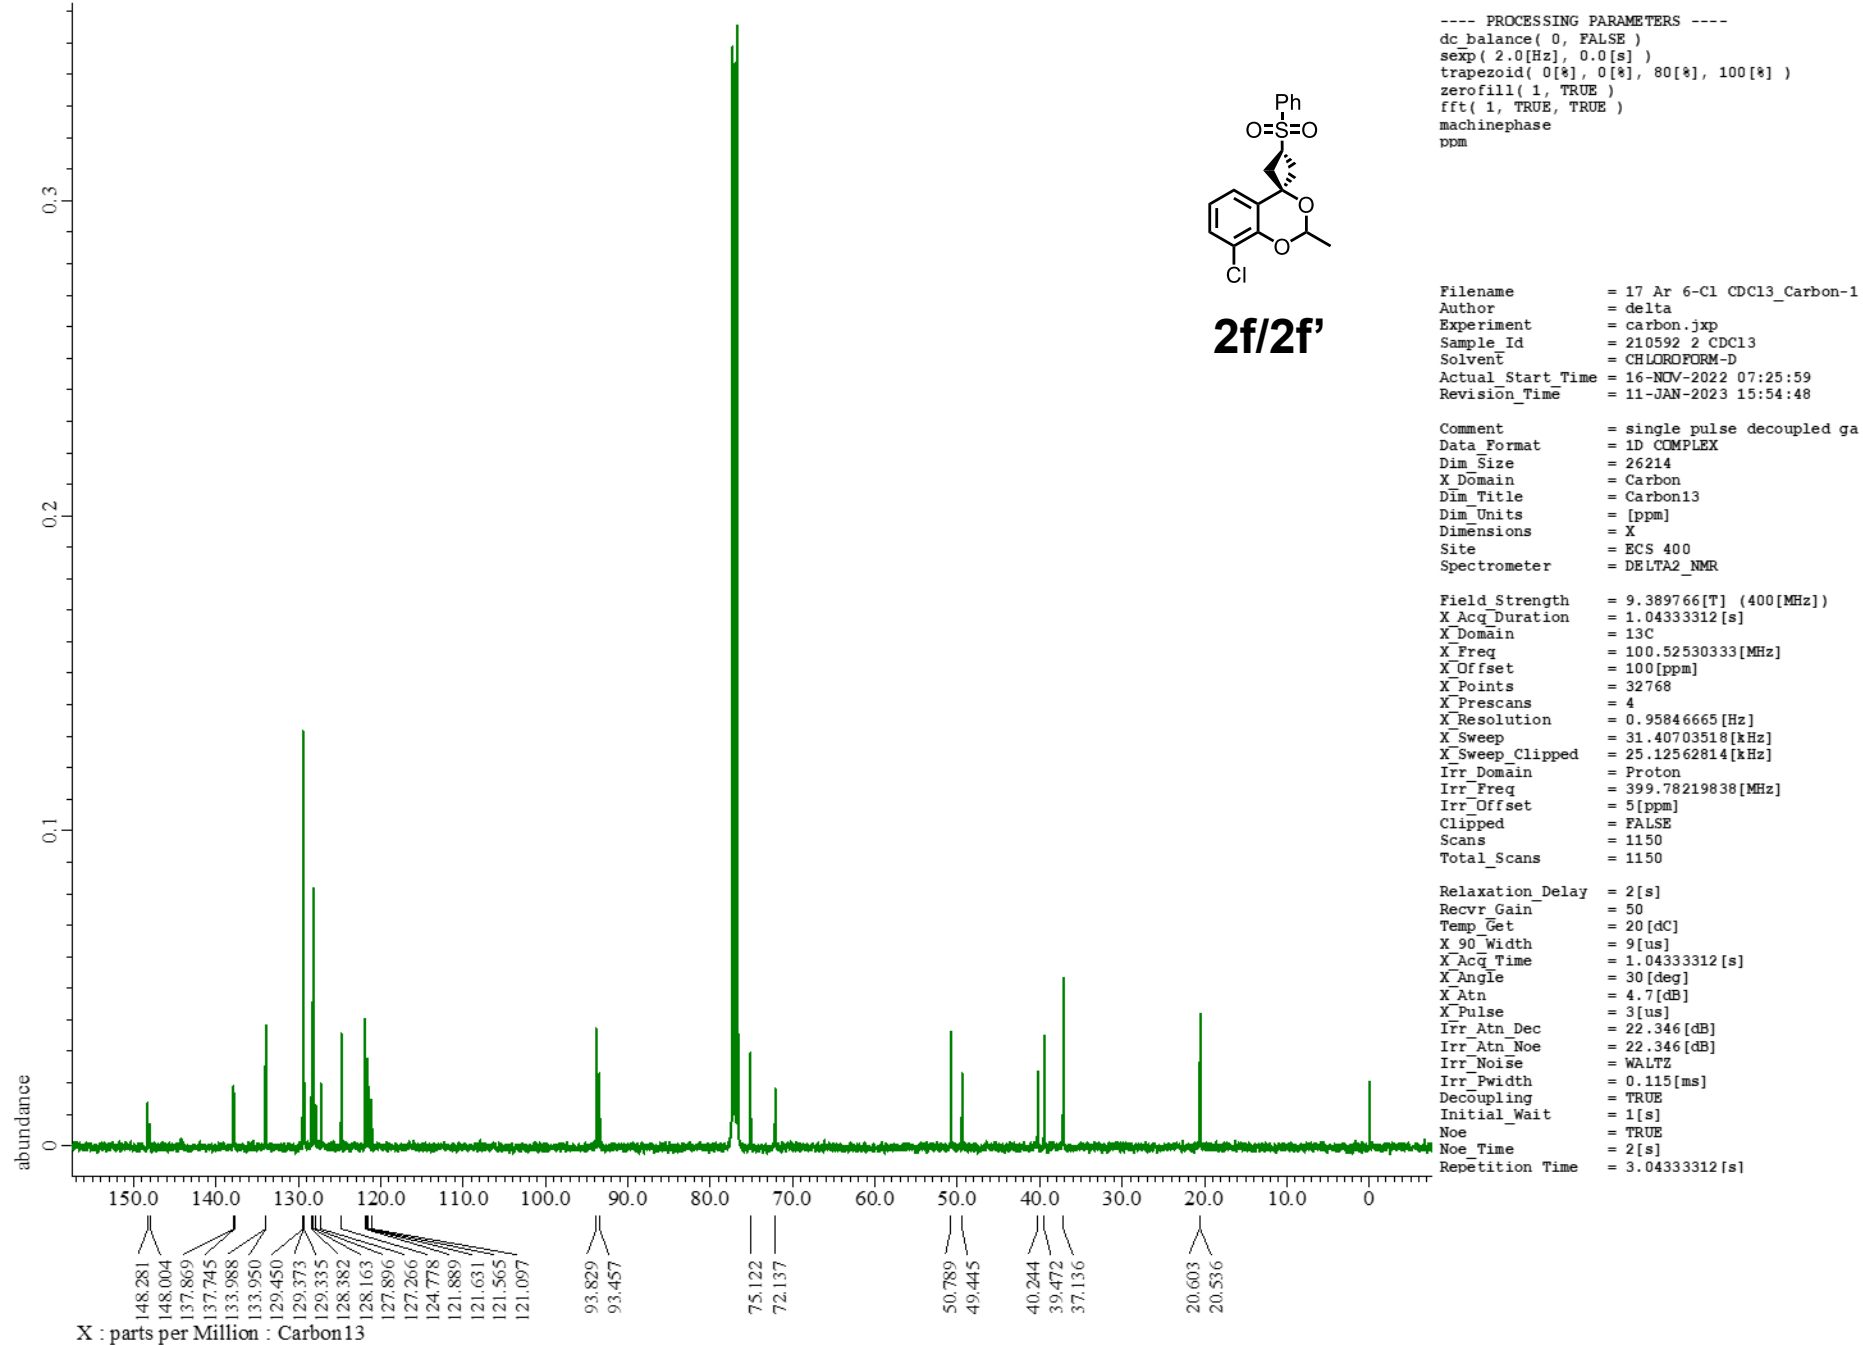

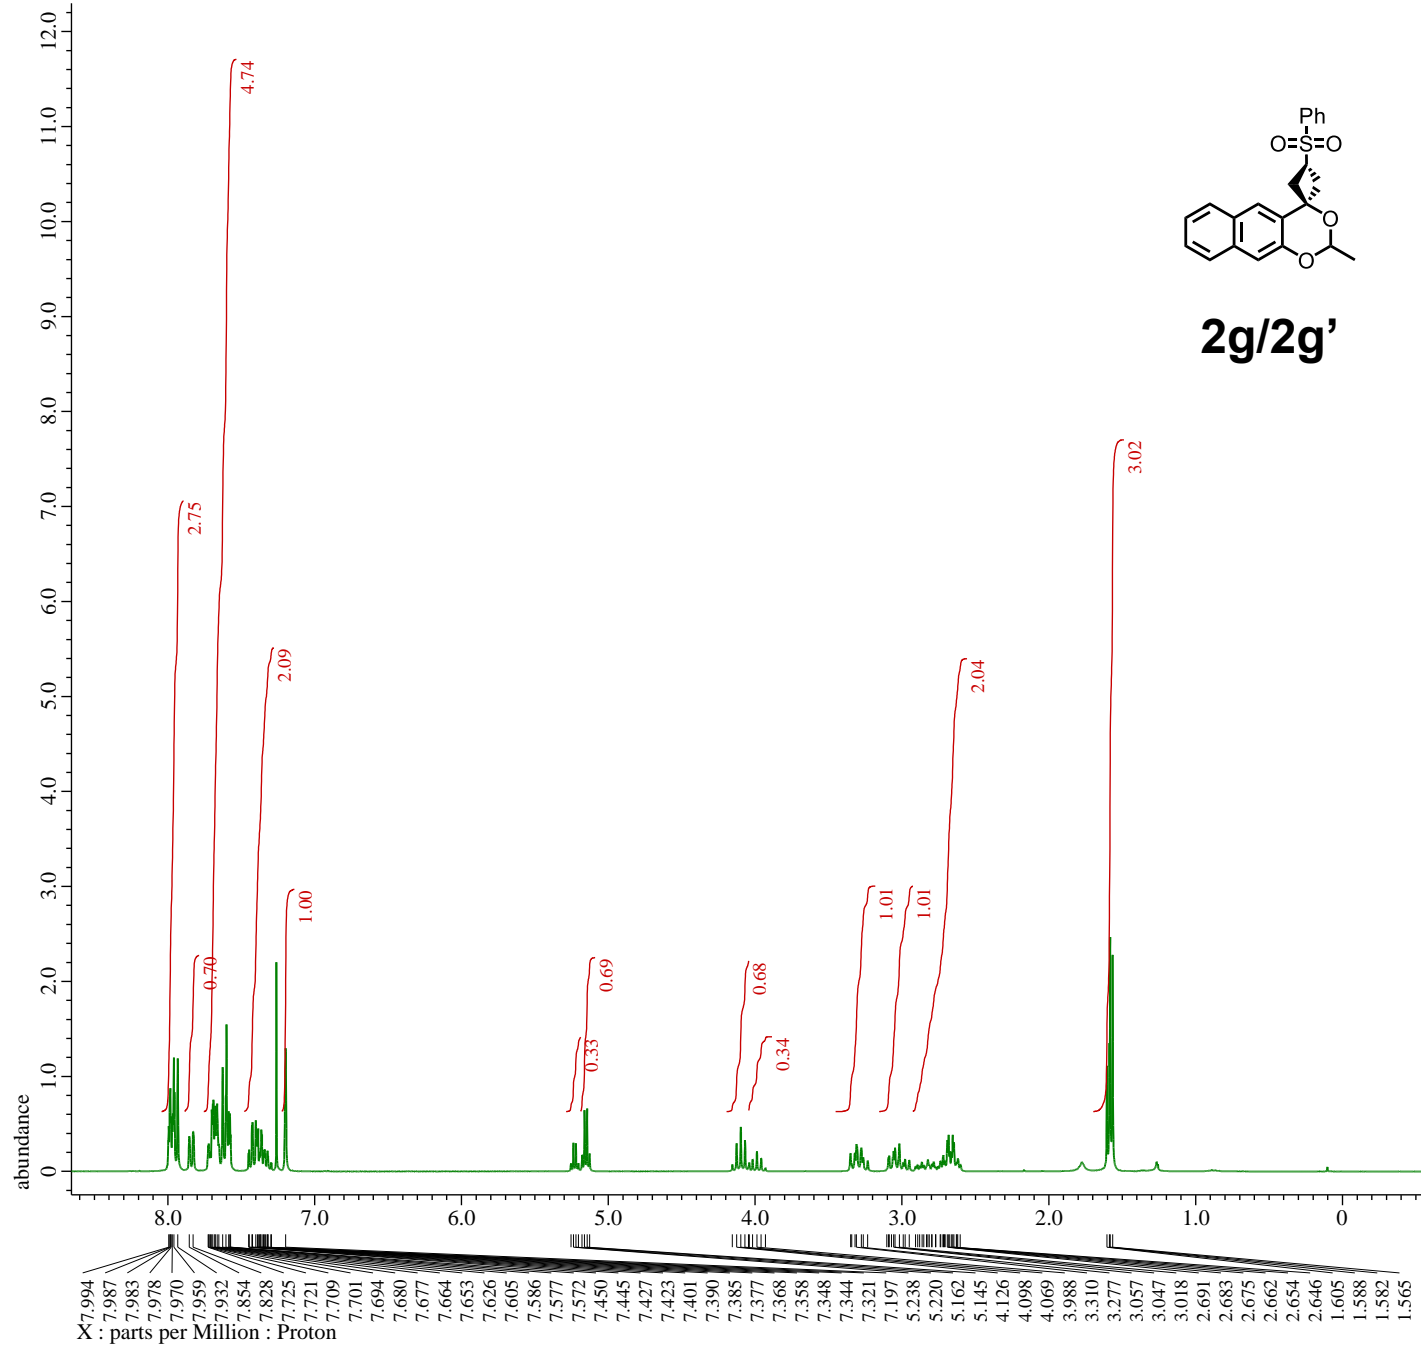

```

---- PROCESSING PARAMETERS ----
dc_balance( 0, FALSE )
sexp( 0.2[Hz], 0.0[s] )
trapezoid( 0[%], 0[%], 80[%], 100[%] )
zerofill( 1, TRUE )
fft( 1, TRUE, TRUE )
machinephase
ppm

```

```

Filename      = 18_2,3-naphthyl CDC13_Pro
Author       = delta
Experiment   = proton.jxp
Sample_Id    = 210695-696 column2 CDC13
Solvent      = CHLOROFORM-D
Actual_Start_Time = 16-MAR-2023 09:57:19
Revision_Time  = 16-MAR-2023 11:38:08

```

```

Comment      = single_pulse
Data_Format   = 1D COMPLEX
Dim_Size     = 13107
X_Domain     = Proton
Dim_Title    = Proton
Dim_Units    = [ppm]
Dimensions   = X
Site         = ECS 300
Spectrometer = DELTA2_NMR

```

```

Field_Strength = 7.0586013[T] (300[MHz])
X_Acq_Duration = 2.90717696[s]
X_Domain      = 1H
X_Freq       = 300.52965592[MHz]
X_Offset     = 5[ppm]
X_Points     = 16384
X_Prescans   = 1
X_Resolution = 0.34397631[Hz]
X_Sweep      = 5.63570784[kHz]
X_Sweep_Clip = 4.50856628[kHz]
Irr_Domain   = Proton
Irr_Freq    = 300.52965592[MHz]
Irr_Offset   = 5[ppm]
Tri_Domain   = Proton
Tri_Freq    = 300.52965592[MHz]
Tri_Offset   = 5[ppm]
Clipped     = FALSE
Scans       = 8
Total_Scans = 8

```

```

Relaxation_Delay = 5[s]
Recvr_Gain       = 30
Temp_Get        = 19.6[dC]
X_90_Width     = 11[us]
X_Acq_Time     = 2.90717696[s]
X_Angle        = 45[deg]
X_Atn          = 1[dB]
X_Pulse        = 5.5[us]
Irr_Mode       = Off
Tri_Mode       = Off
Dante_Presat   = FALSE
Initial_Wait   = 1[s]
Repetition_Time = 7.90717696[s]

```



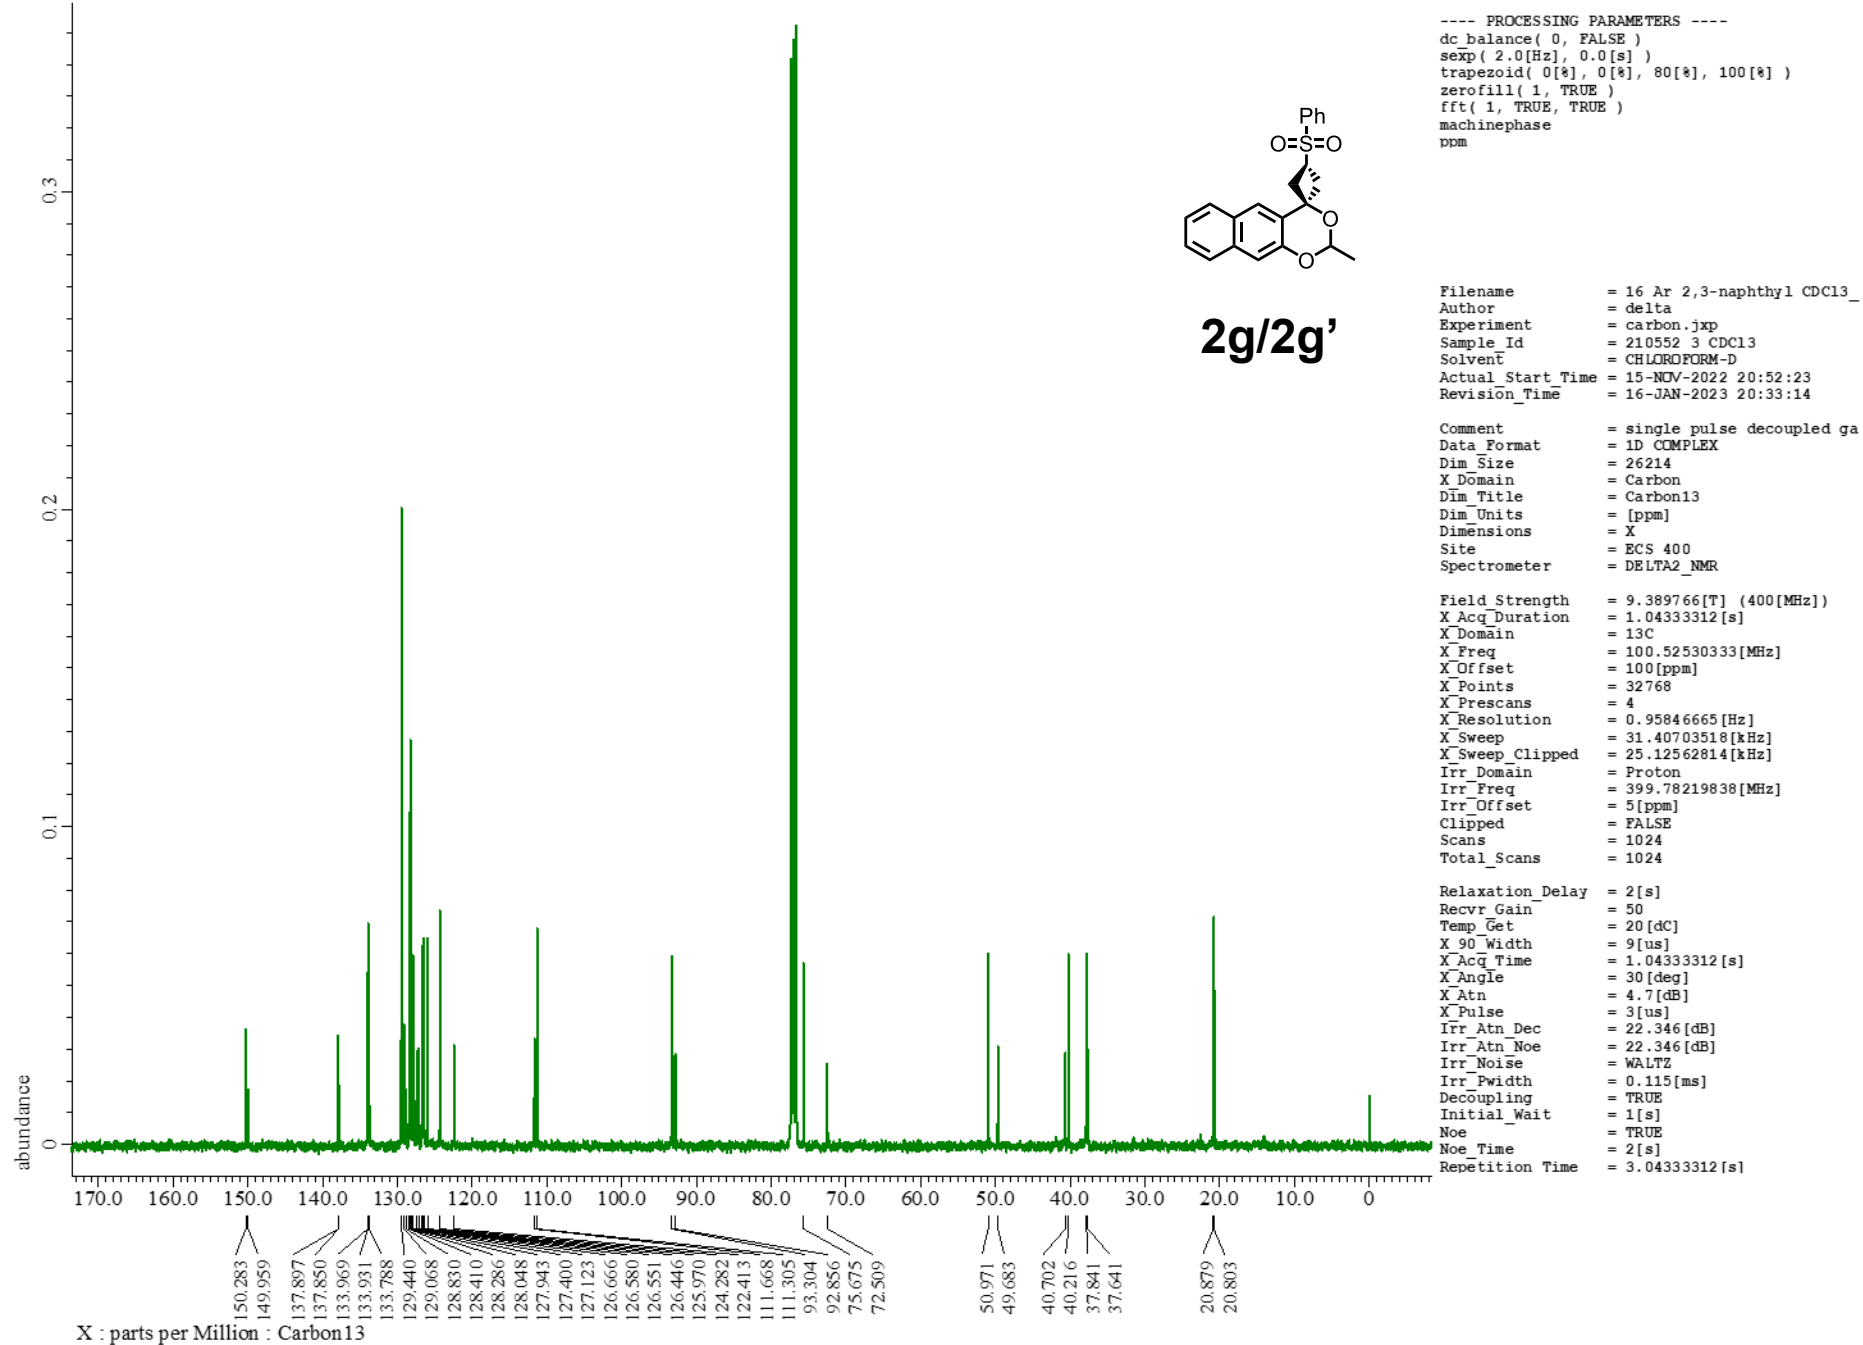

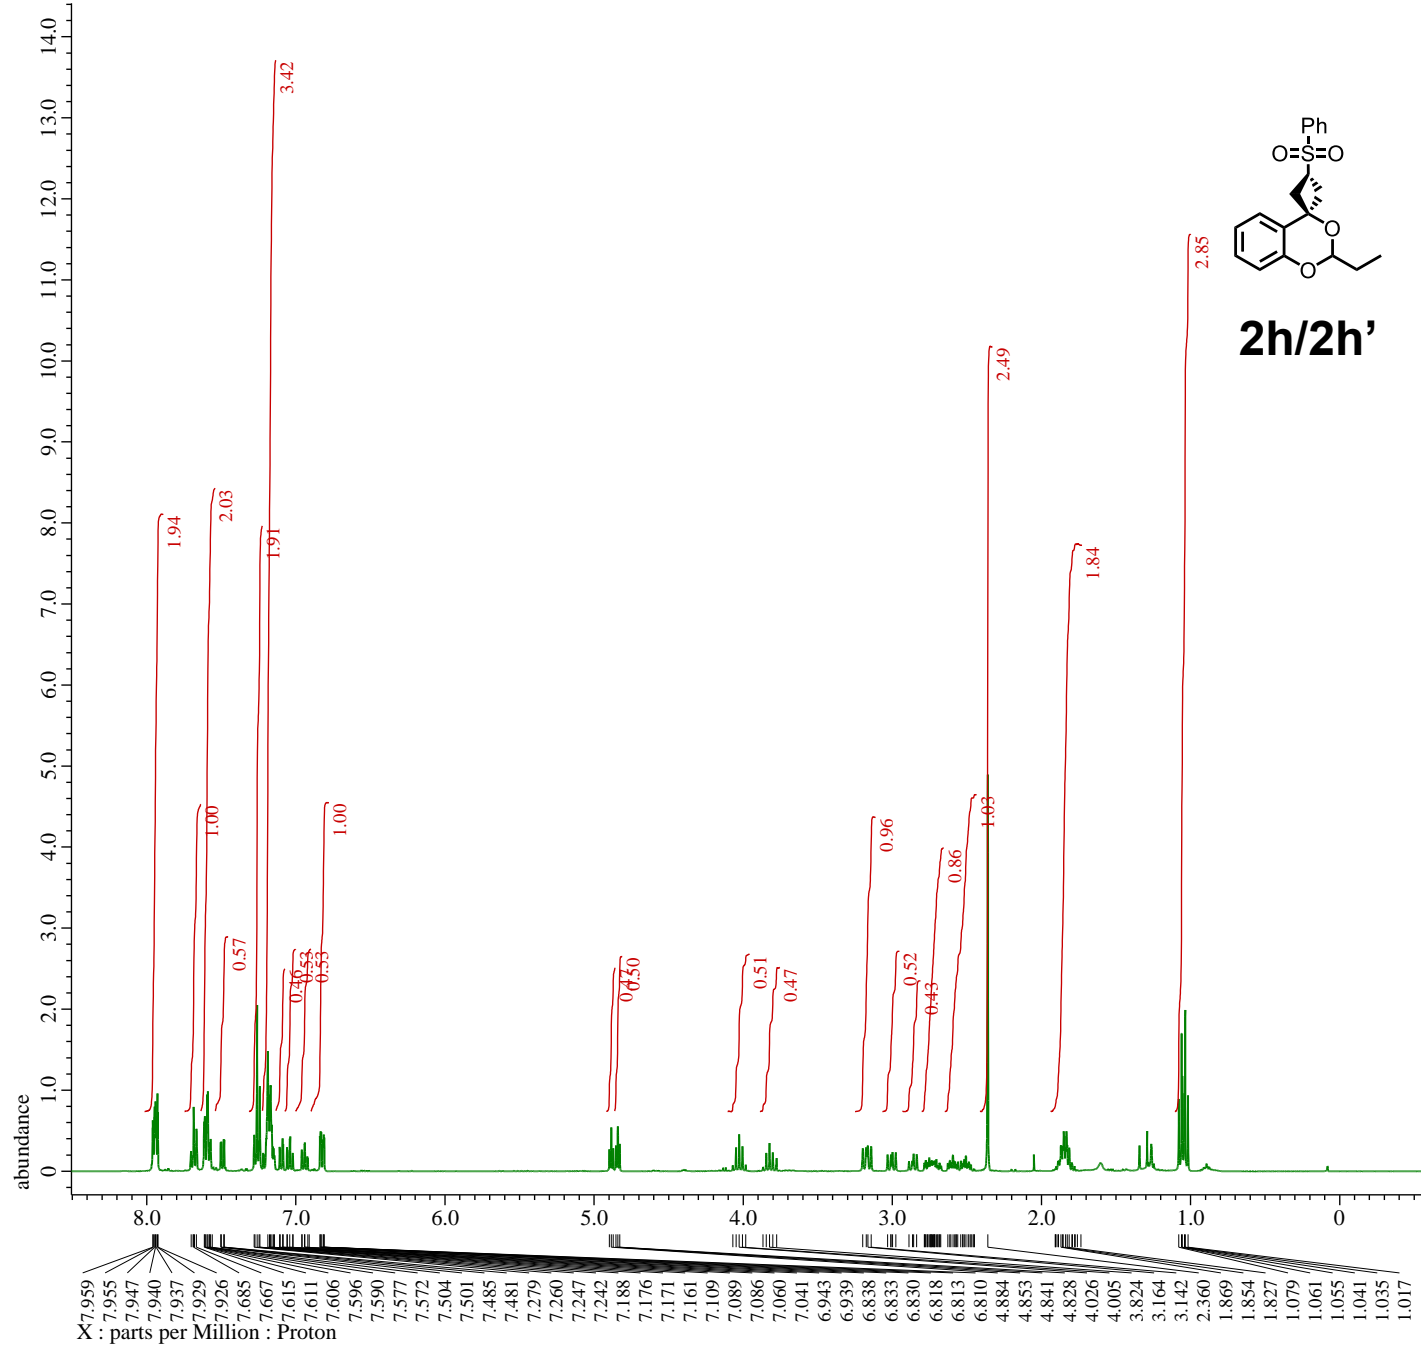

```

---- PROCESSING PARAMETERS ----
dc_balance( 0, FALSE )
sexp( 0.2[Hz], 0.0[s] )
trapezoid( 0[%], 0[%], 80[%], 100[%] )
zerofill( 1, TRUE )
fft( 1, TRUE, TRUE )
machinephase
ppm

```

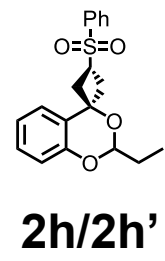

```

Filename      = 18 O-propenyl_Proton-1-2.
Author       = delta
Experiment   = proton.jxp
Sample_Id    = 210680 check CDC13
Solvent      = CHLOROFORM-D
Actual_Start_Time = 11-FEB-2023 00:06:06
Revision_Time  = 16-MAR-2023 12:33:27

```

```

Comment      = single_pulse
Data_Format  = 1D COMPLEX
Dim_Size     = 13107
X_Domain     = Proton
Dim_Title    = Proton
Dim_Units    = [ppm]
Dimensions   = X
Site         = ECS 400
Spectrometer = DELTA2_NMR

```

```

Field_Strength = 9.389766[T] (400[MHz])
X_Acq_Duration = 2.18365952[s]
X_Domain       = 1H
X_Freq         = 399.78219838[MHz]
X_Offset       = 5[ppm]
X_Points       = 16384
X_Prescans     = 1
X_Resolution   = 0.45794685[Hz]
X_Sweep        = 7.5030012[kHz]
X_Sweep_Clippped = 6.00240096[kHz]
Irr_Domain     = Proton
Irr_Freq       = 399.78219838[MHz]
Irr_Offset     = 5[ppm]
Tri_Domain     = Proton
Tri_Freq       = 399.78219838[MHz]
Tri_Offset     = 5[ppm]
Clipped        = FALSE
Scans          = 16
Total_Scans    = 16

```

```

Relaxation_Delay = 5[s]
Recvr_Gain       = 36
Temp_Get         = 20.8[dC]
X_90_Width       = 12.4[us]
X_Acq_Time       = 2.18365952[s]
X_Angle          = 45[deg]
X_Atn           = 3[dB]
X_Pulse         = 6.2[us]
Irr_Mode         = Off
Tri_Mode        = Off
Dante_Presat    = FALSE
Initial_Wait     = 1[s]
Repetition_Time  = 7.18365952[s]

```

<sup>1</sup>H NMR spectrum of 2h/2h' (400 MHz, CDCl<sub>3</sub>)

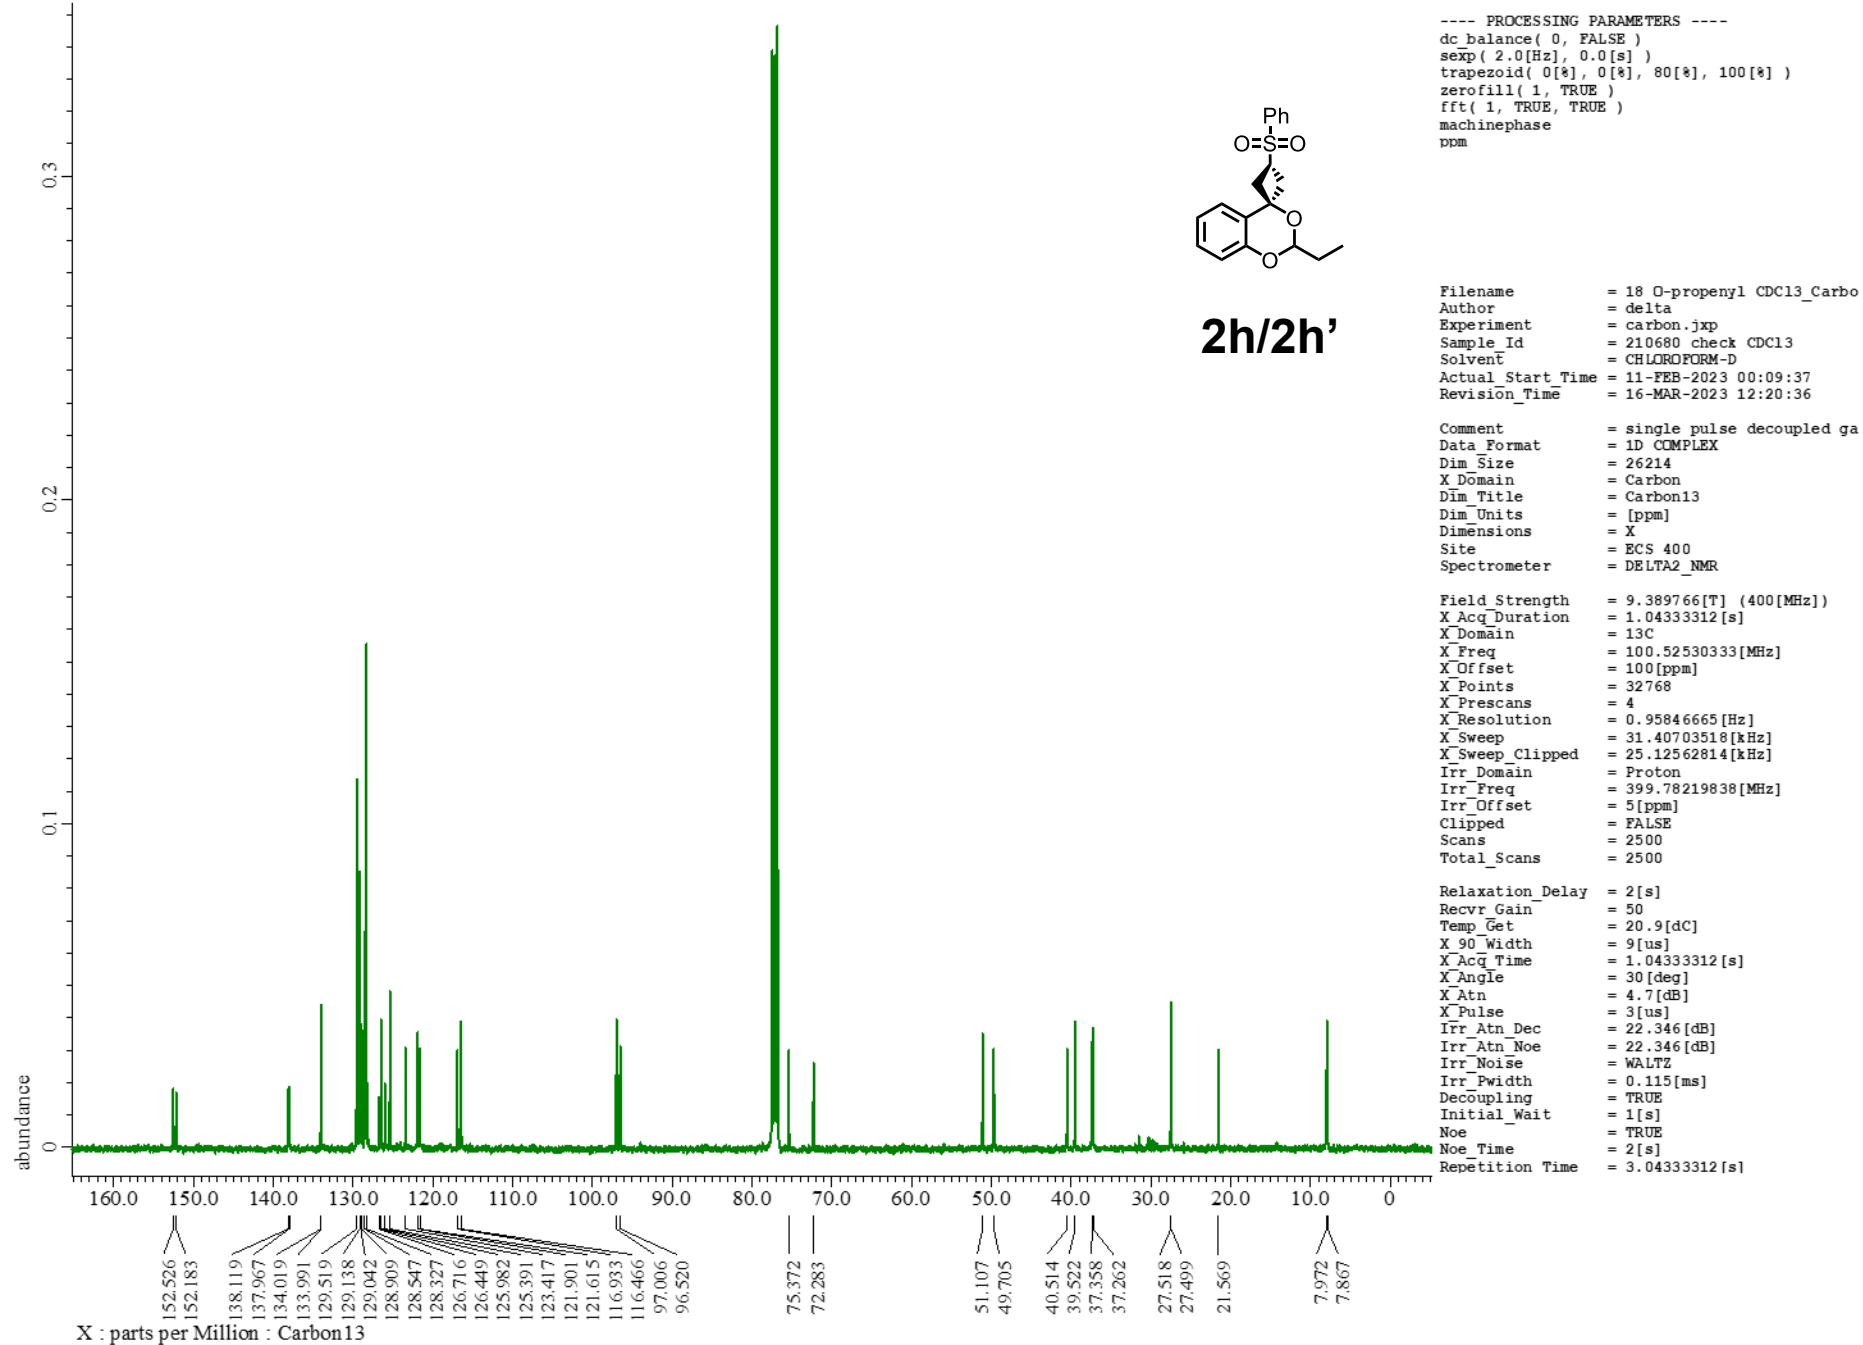

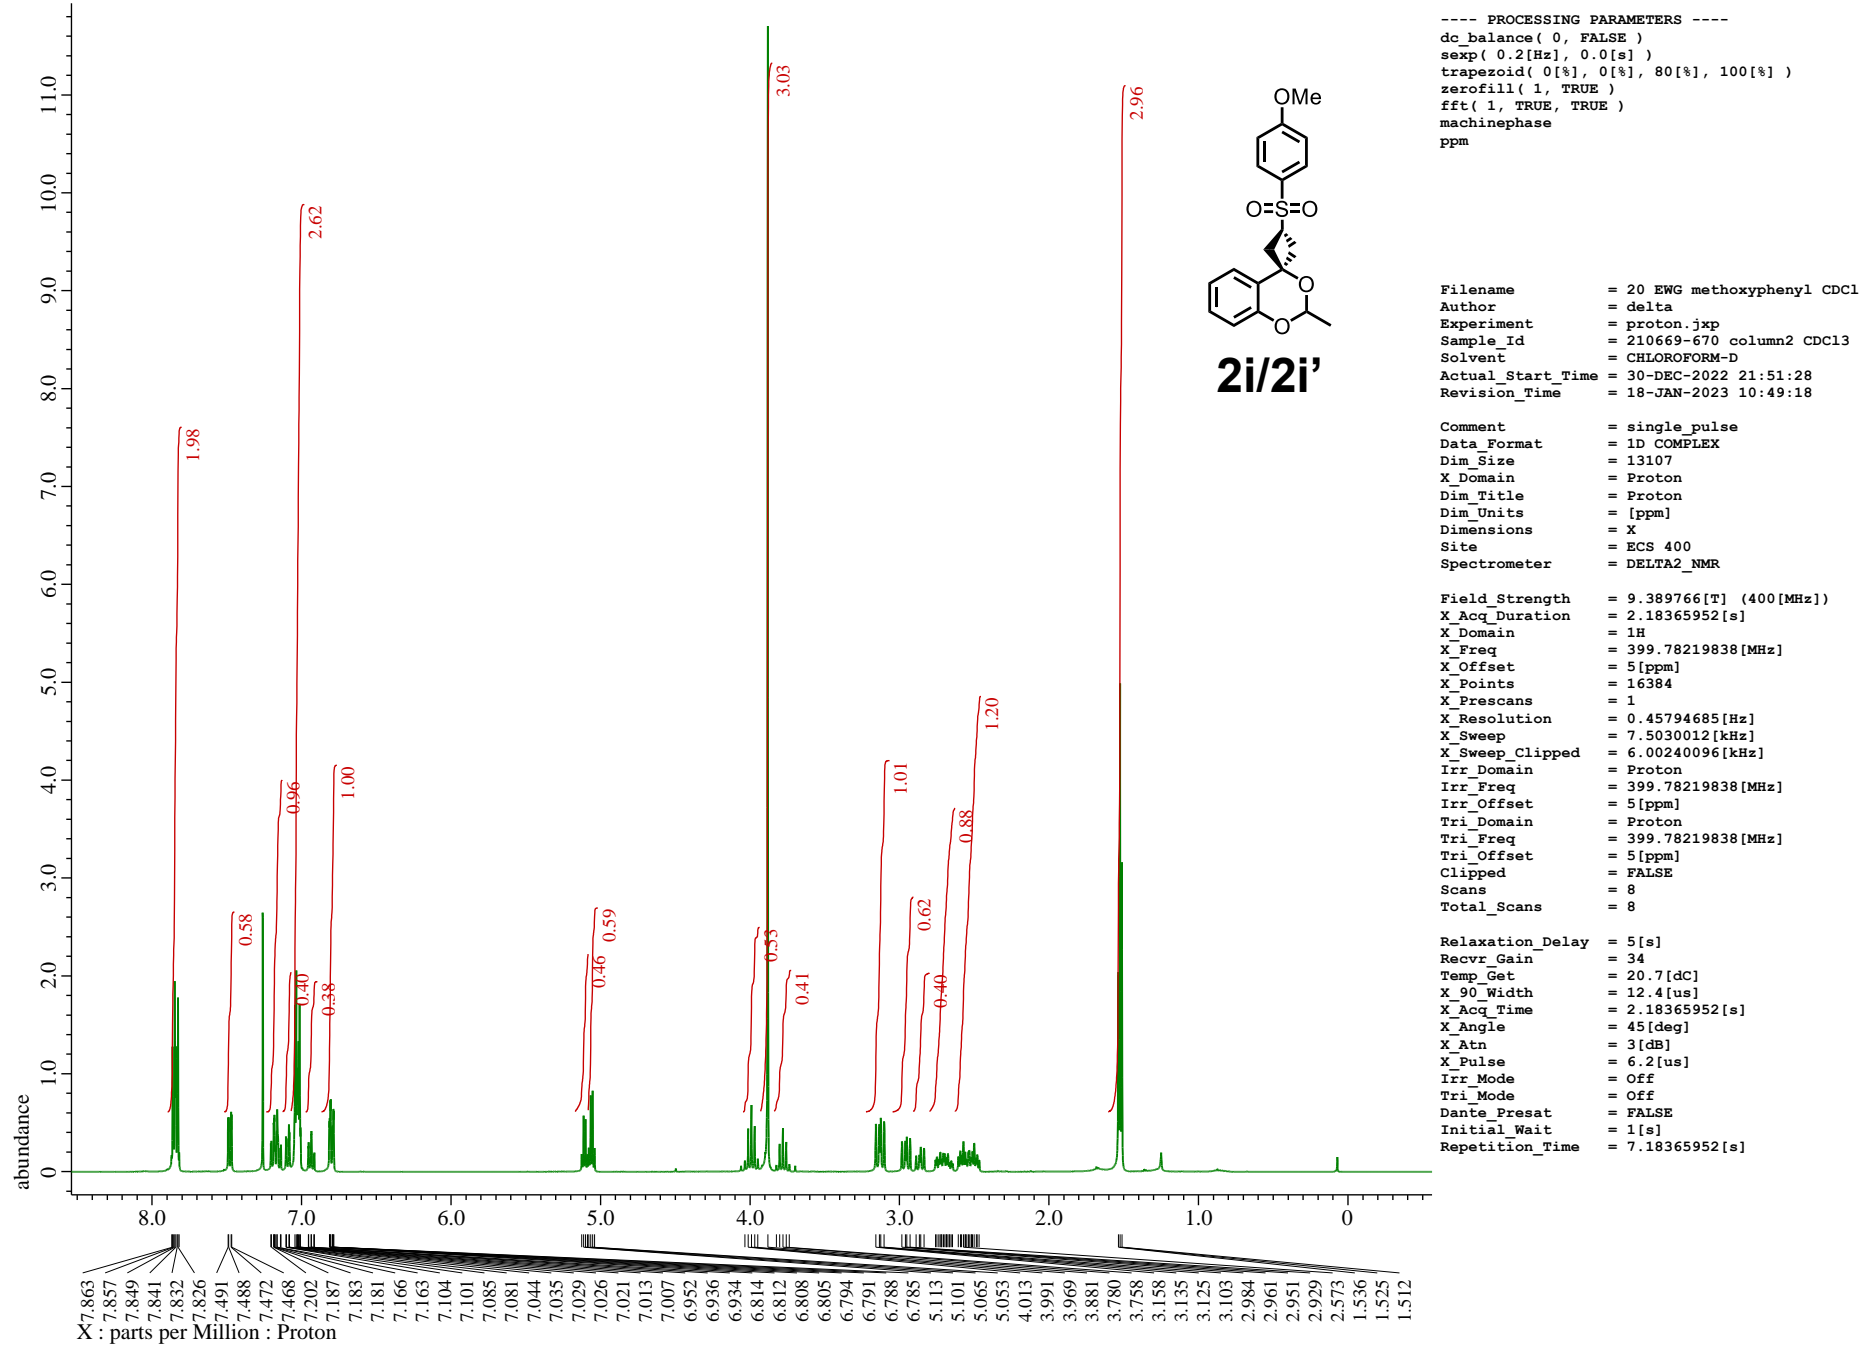

<sup>1</sup>H NMR spectrum of **2i/2i'** (400 MHz, CDCl<sub>3</sub>)

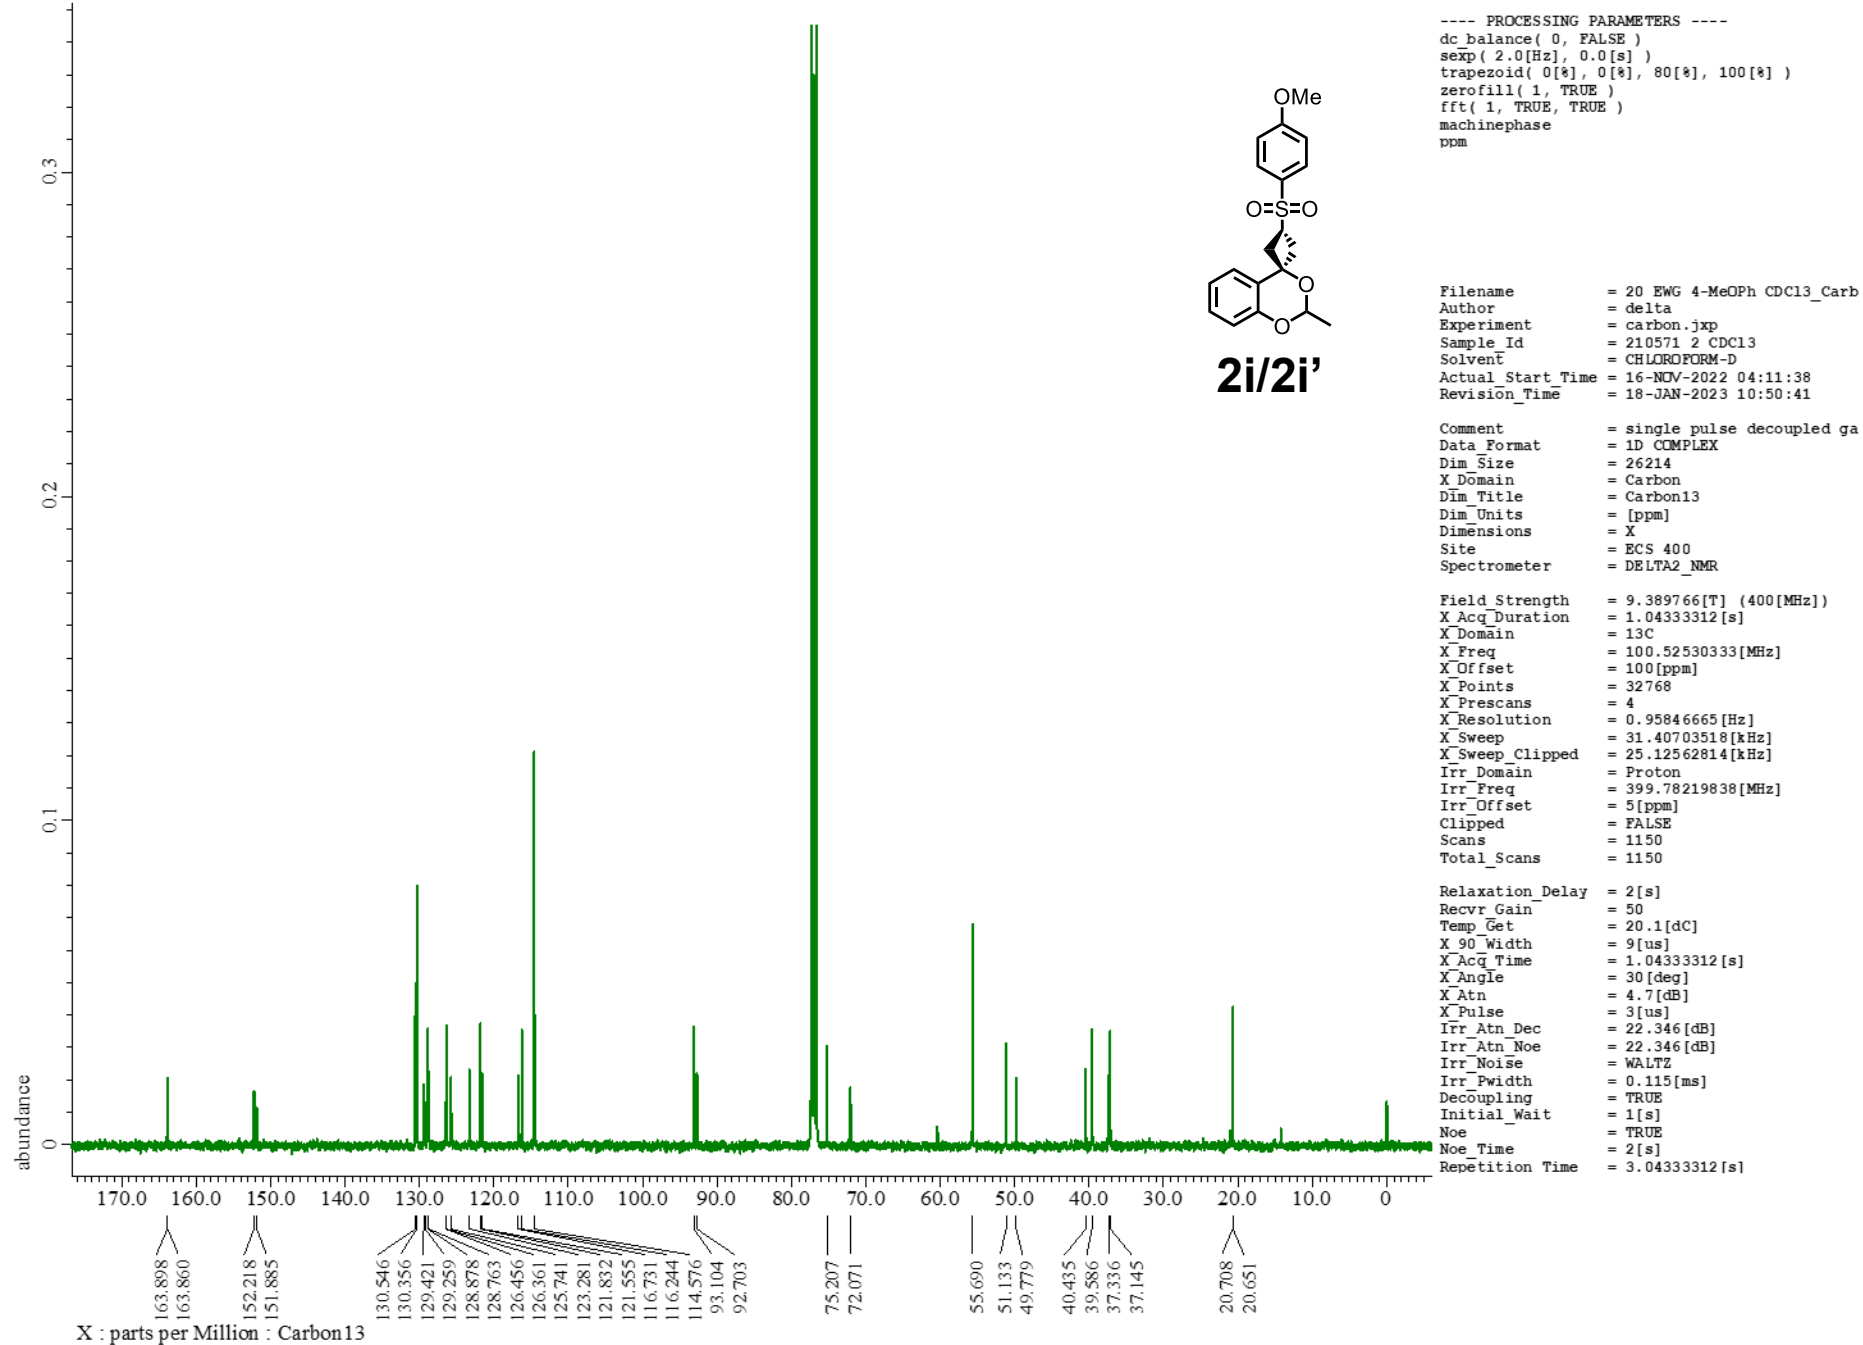

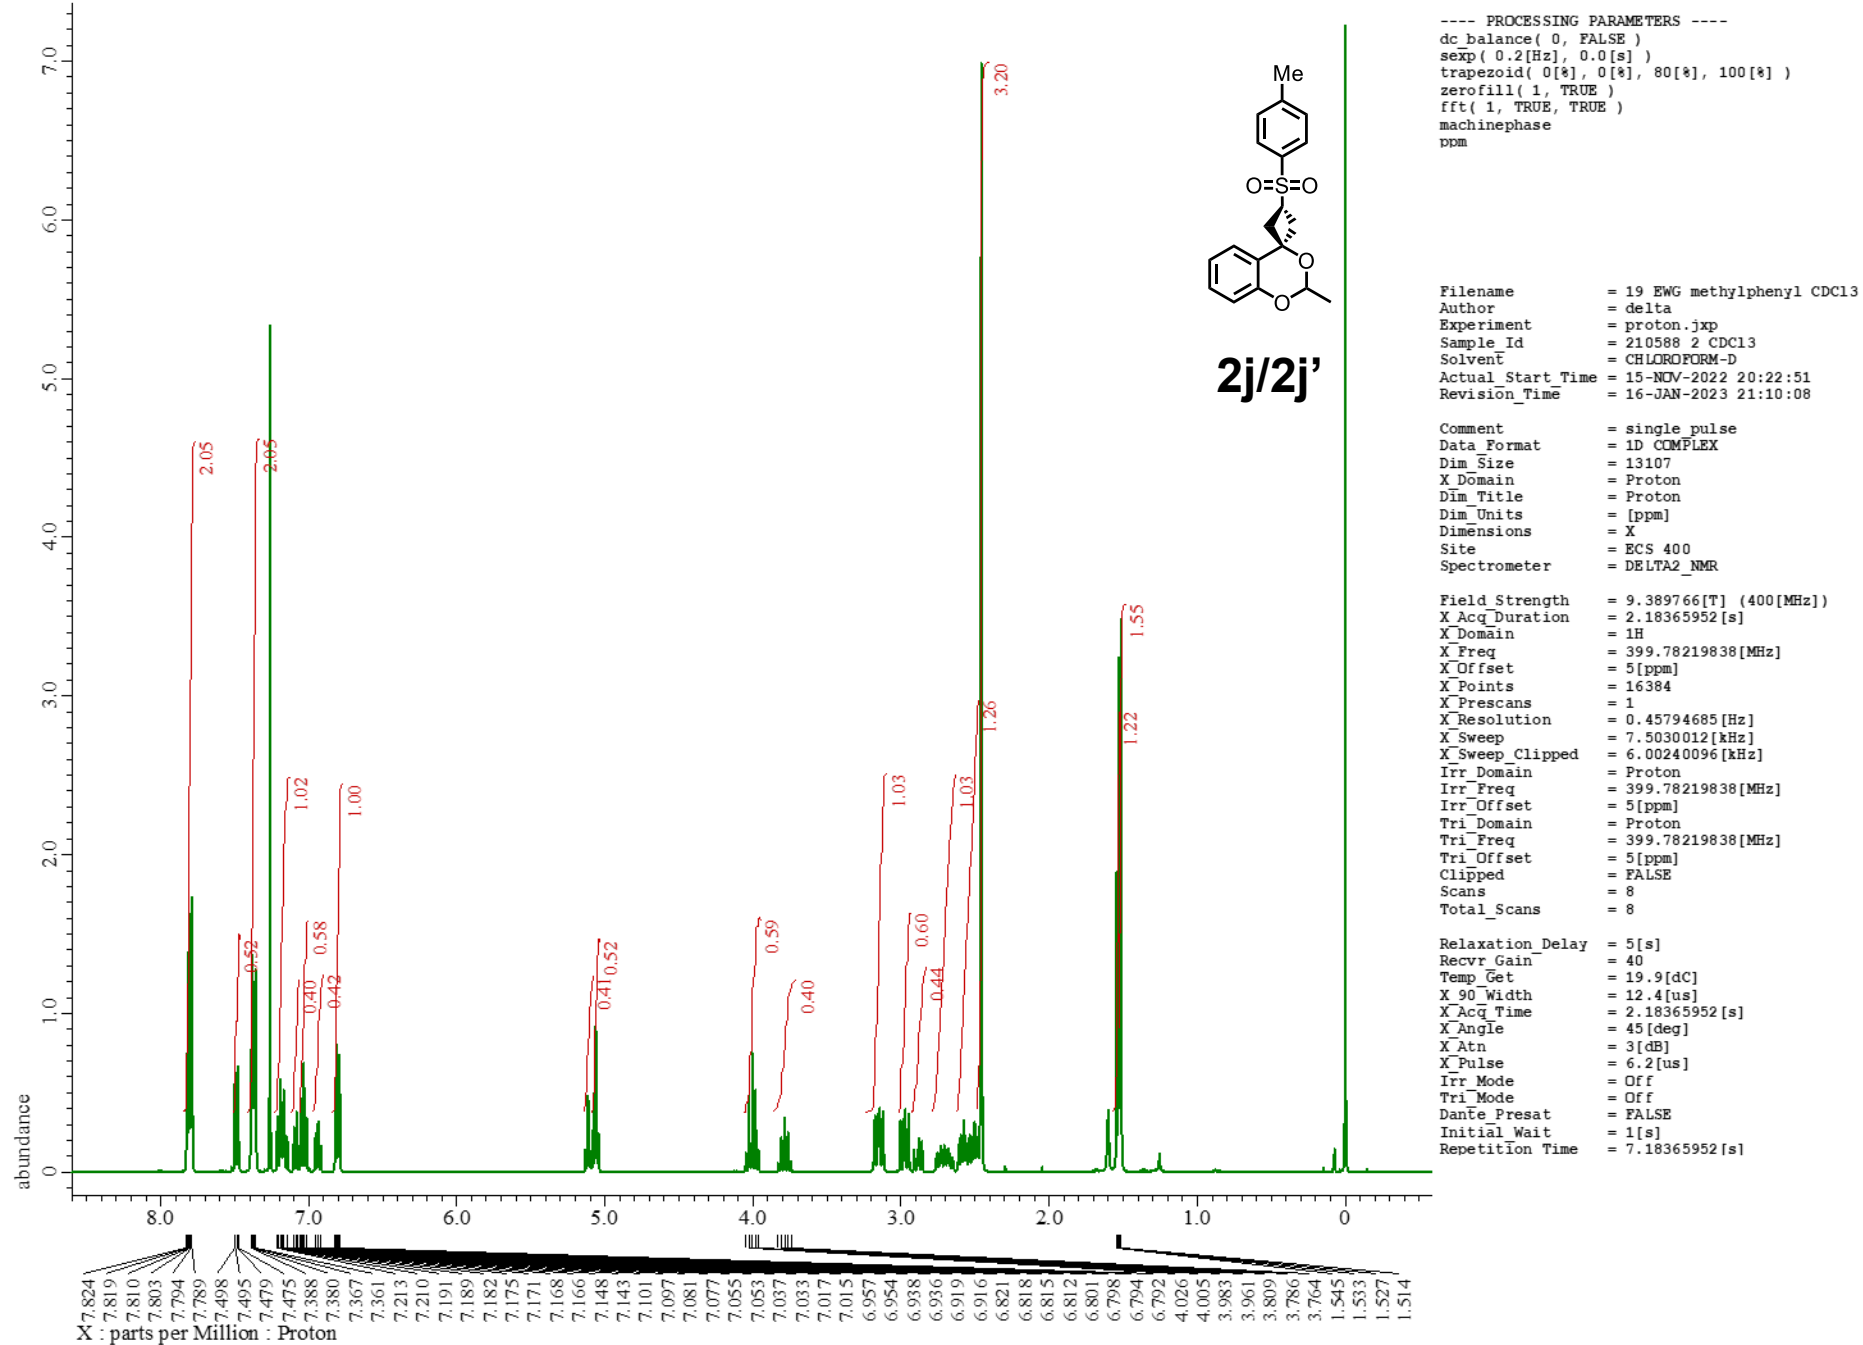

<sup>1</sup>H NMR spectrum of **2j/2j'** (400 MHz, CDCl<sub>3</sub>)

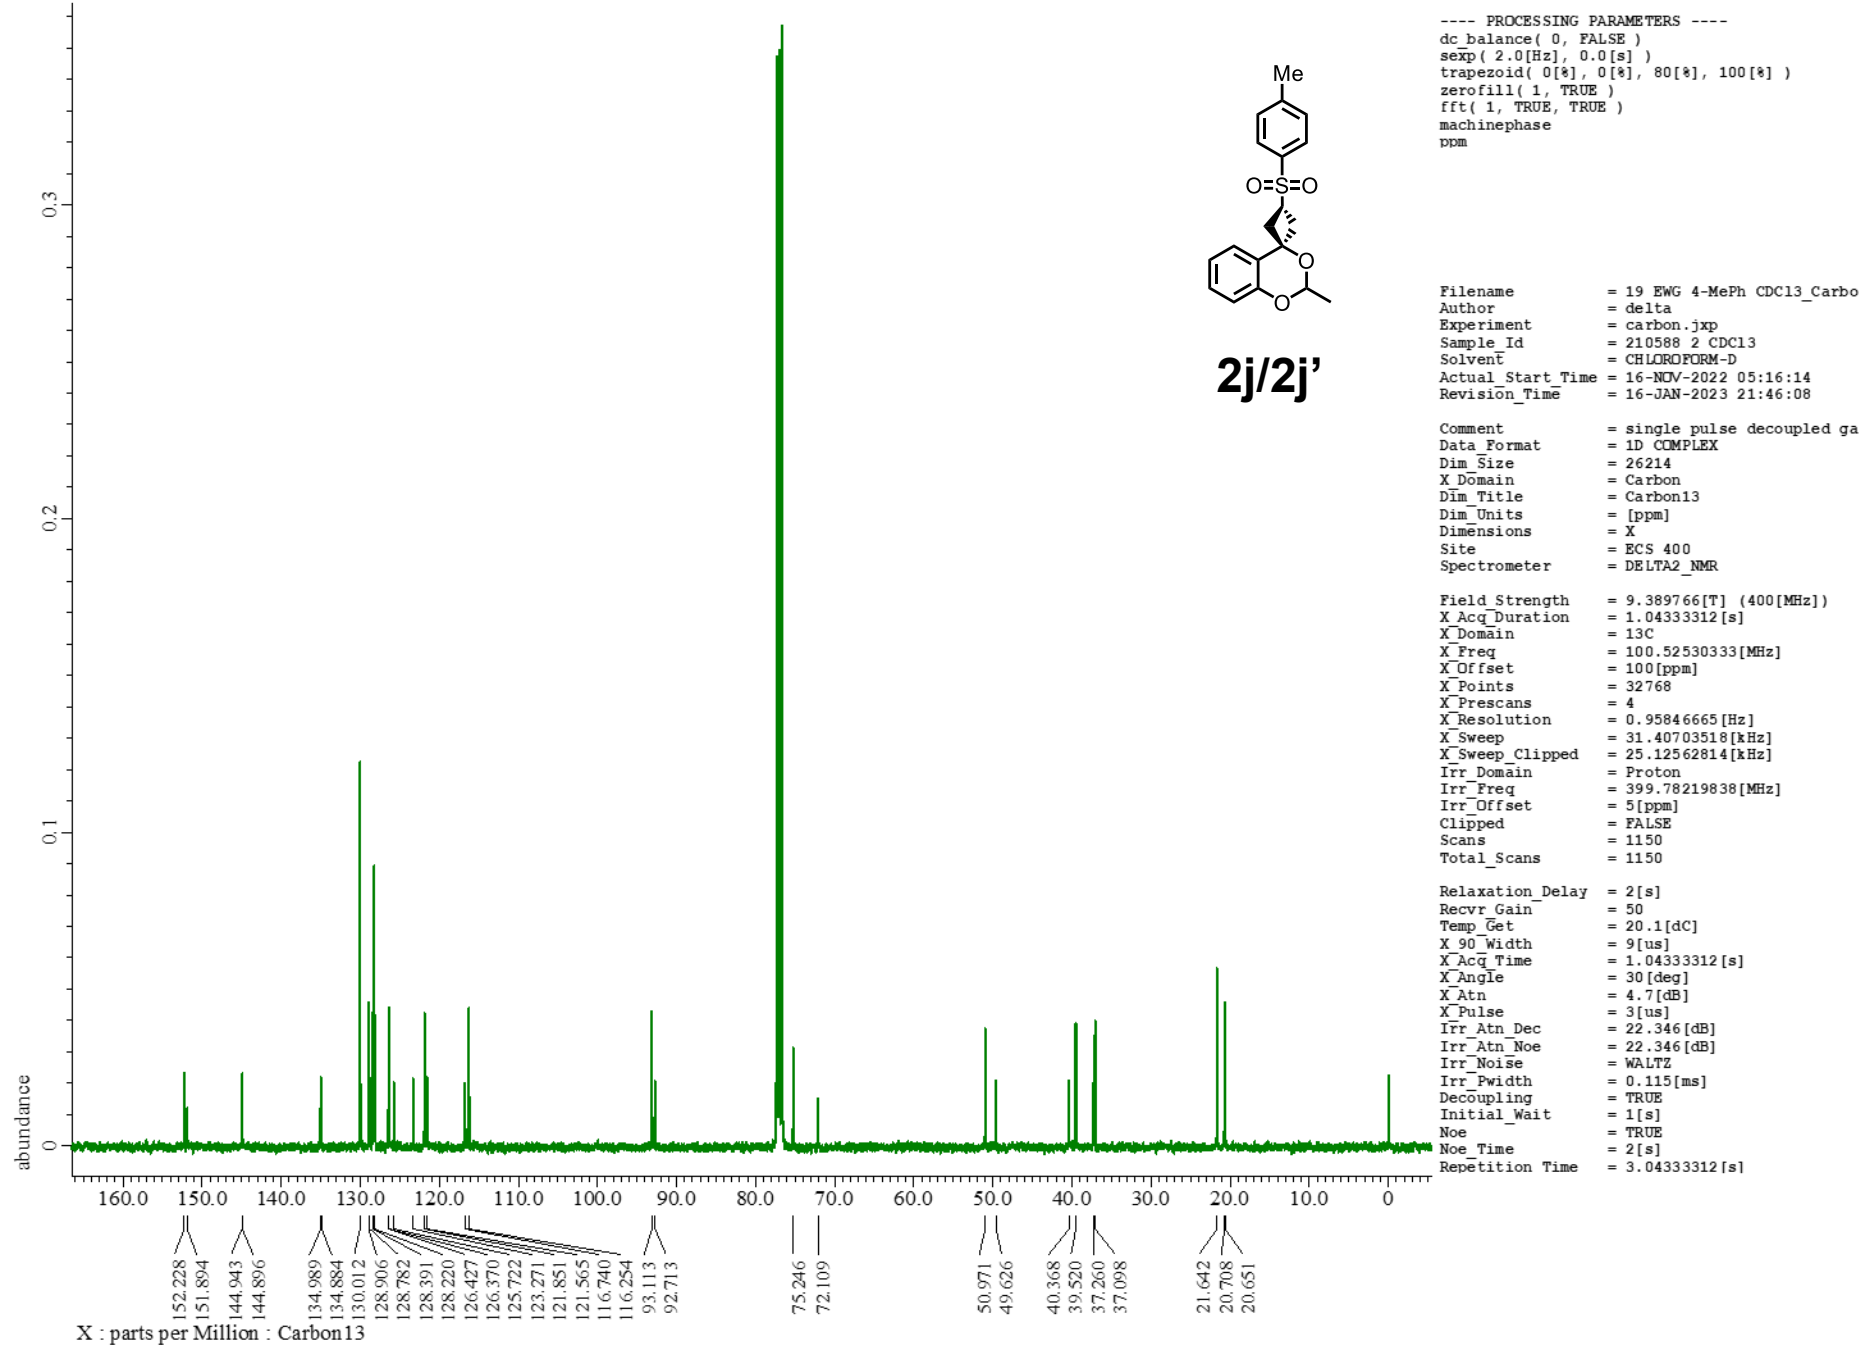

<sup>13</sup>C NMR spectrum of 2j/2j' (101 MHz, CDCl<sub>3</sub>)

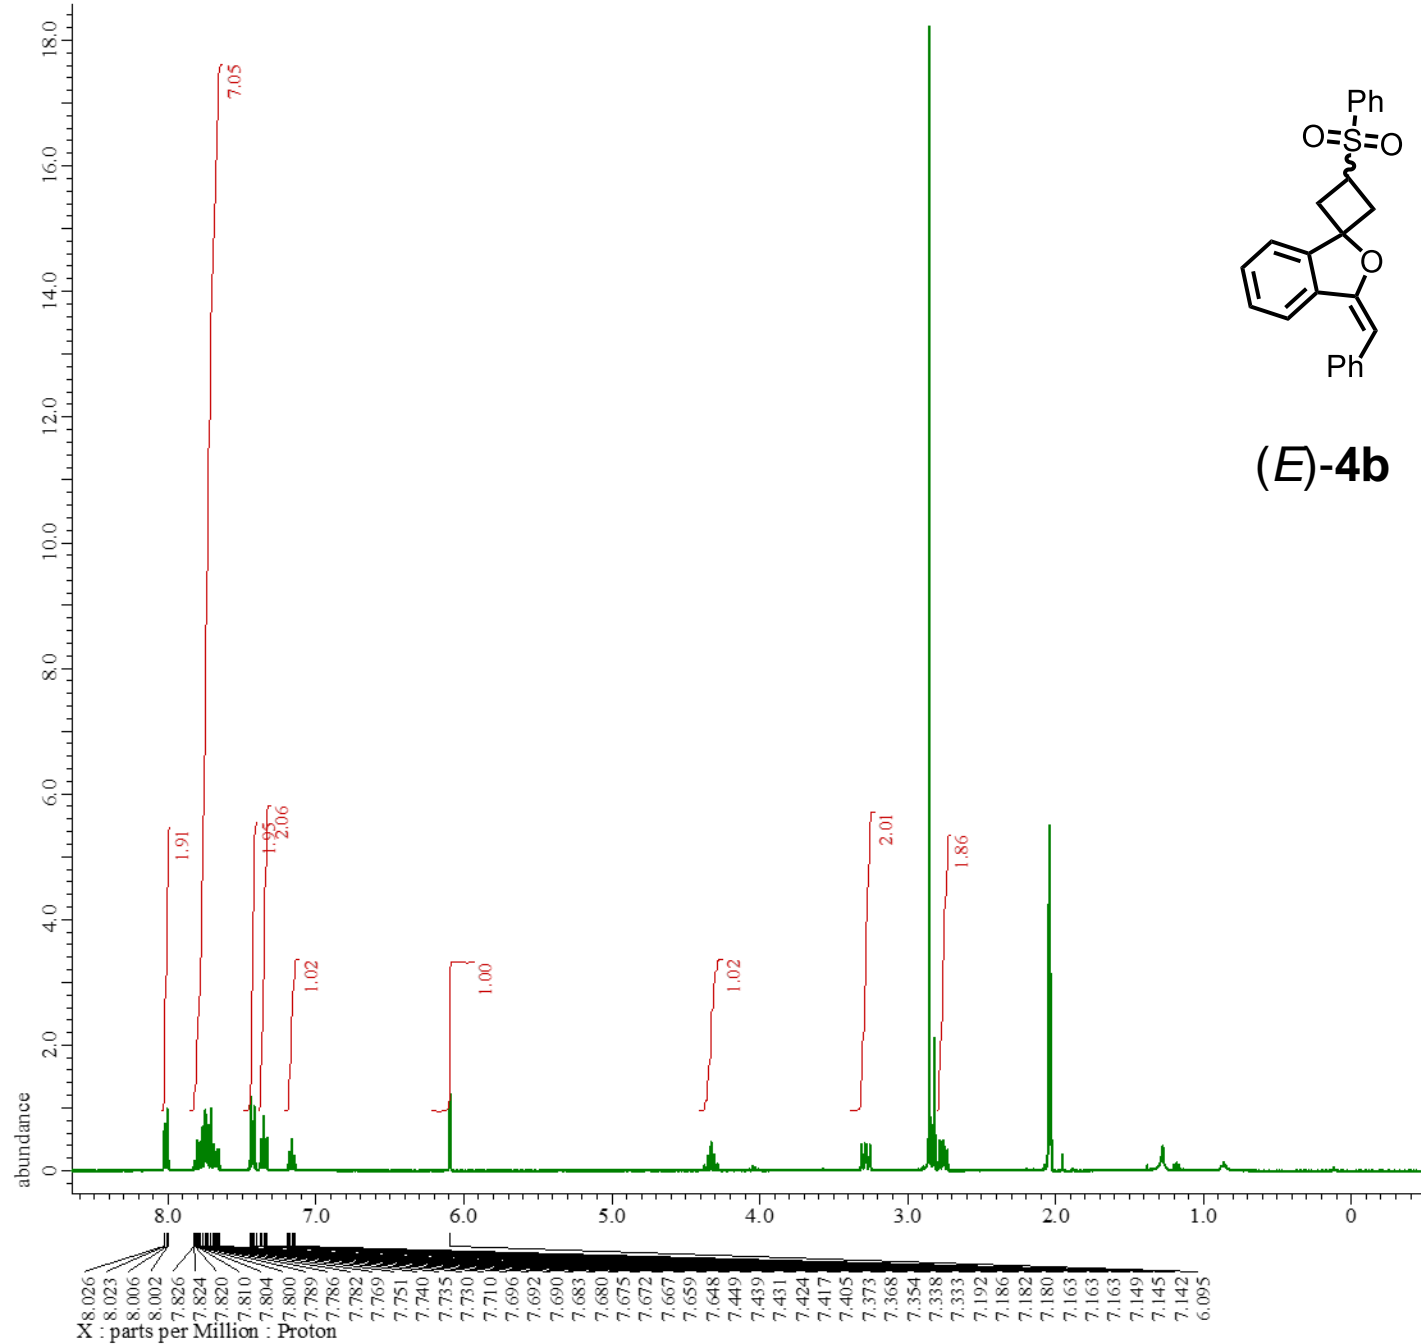

```

---- PROCESSING PARAMETERS ----
dc balance( 0, FALSE )
sexp( 0.2[Hz], 0.0[s] )
trapezoid( 0[&], 0[&], 80[&], 100[&] )
zerofill( 1, TRUE )
fft( 1, TRUE, TRUE )
machinephase
ppm

Filename      = 210697-698 column down Ac
Author       = delta
Experiment   = proton.jxp
Sample Id    = 210697-698 column down Ac
Solvent      = ACETONE-D6
Actual_Start_Time = 12-FEB-2023 17:04:47
Revision_Time   = 17-MAR-2023 11:56:05

Comment      = single pulse
Data Format   = 1D COMPLEX
Dim_Size     = 13107
X_Domain     = Proton
Dim_Title    = Proton
Dim_Units    = [ppm]
Dimensions   = X
Site         = ECS 400
Spectrometer = DELTA2_NMR

Field Strength = 9.389766[T] (400[MHz])
X_Acq_Duration = 2.18365952[s]
X_Domain       = 1H
X_Freq         = 399.78219838[MHz]
X_Offset       = 5[ppm]
X_Points       = 16384
X_Prescans     = 1
X_Resolution   = 0.45794685[Hz]
X_Sweep        = 7.5030012[kHz]
X_Sweep_Clippped = 6.00240096[kHz]
Irr_Domain     = Proton
Irr_Freq       = 399.78219838[MHz]
Irr_Offset     = 5[ppm]
Tri_Domain     = Proton
Tri_Freq       = 399.78219838[MHz]
Tri_Offset     = 5[ppm]
Clipped        = FALSE
Scans          = 8
Total_Scans    = 8

Relaxation_Delay = 5[s]
Recr Gain        = 44
Temp_Get         = 20.1[dc]
X_90_Width      = 12.4[us]
X_Acq_Time      = 2.18365952[s]
X_Angle         = 45[deg]
X_Atn           = 3[dB]
X_Pulse         = 6.2[us]
Irr_Mode        = Off
Tri_Mode        = Off
DanTe Presat    = FALSE
Initial Wait    = 1[s]
Repetition Time = 7.18365952[s]

```

<sup>1</sup>H NMR spectrum of **(E)-4b** (301 MHz, Acetone-*d*<sub>6</sub>)



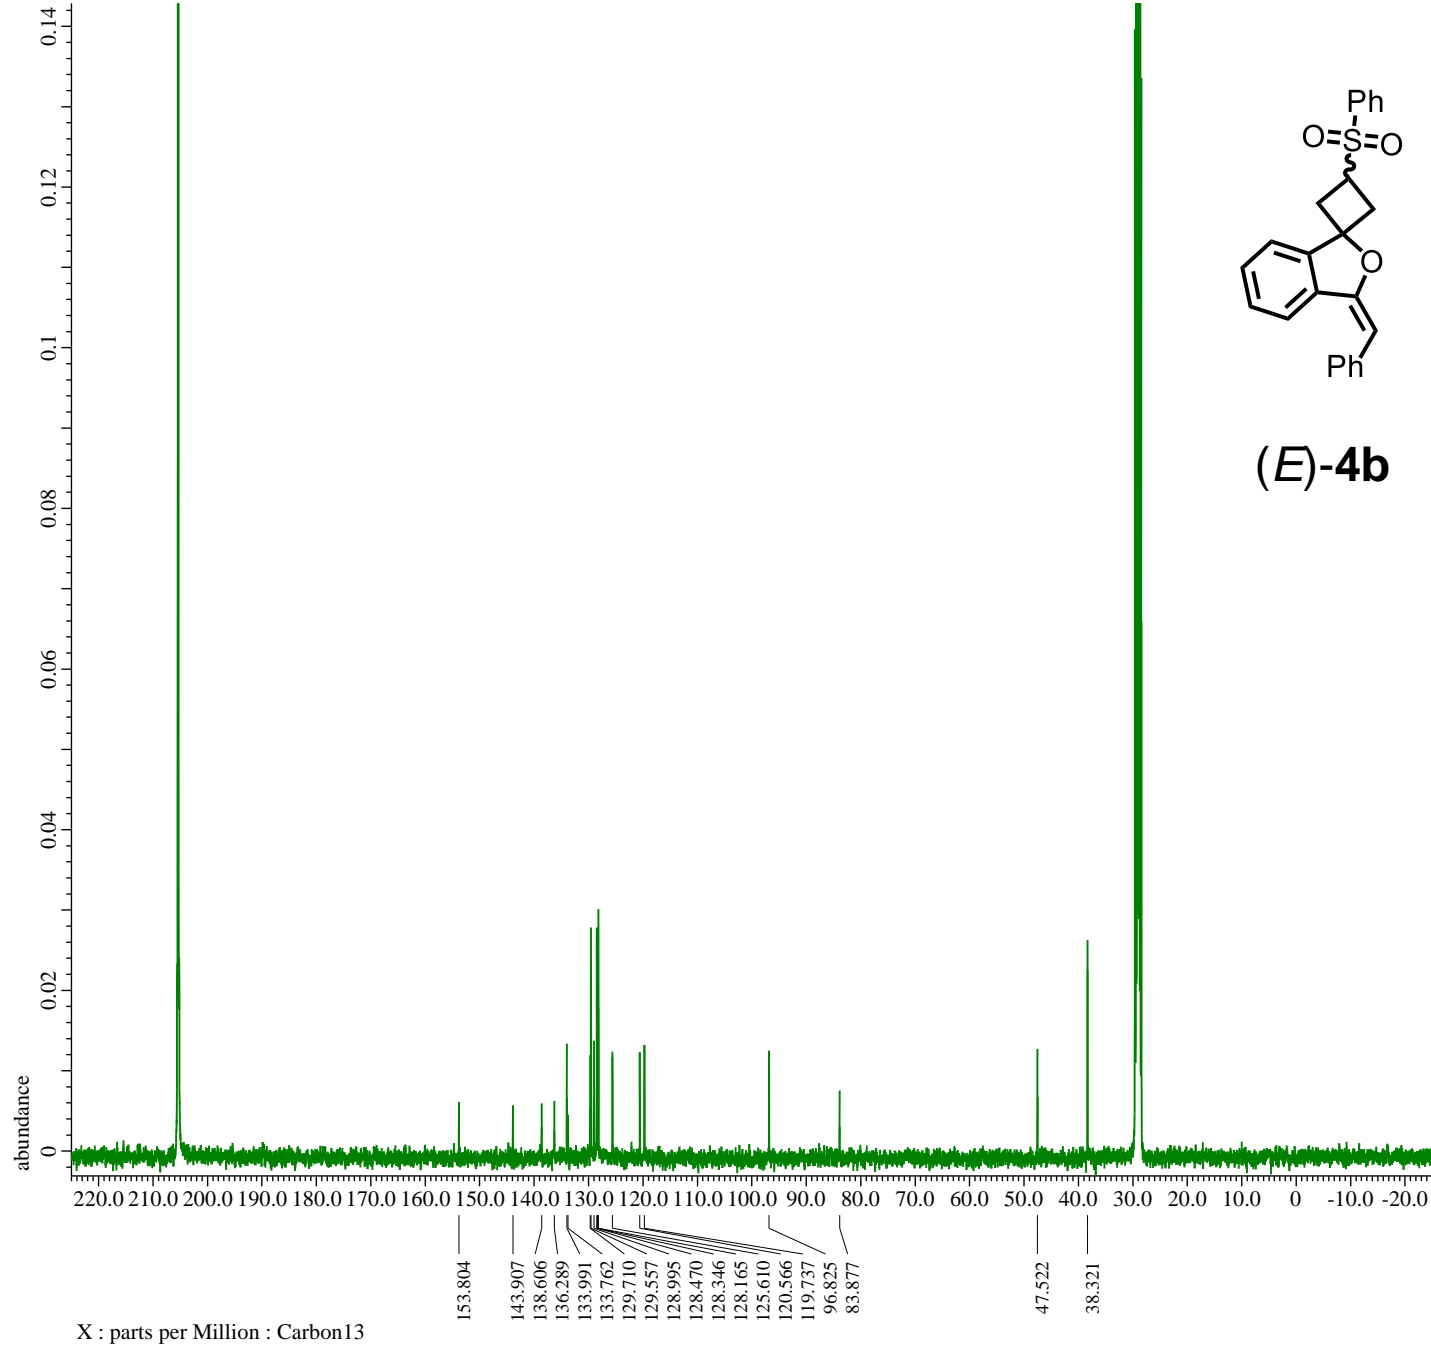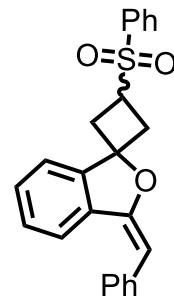

(E)-4b

```

---- PROCESSING PARAMETERS ----
dc_balance( 0, FALSE )
sexp( 2.0[Hz], 0.0[s] )
trapezoid( 0[%], 0[%], 80[%], 100[%] )
zerofill( 1, TRUE )
fft( 1, TRUE, TRUE )
machinephase
ppm

Filename           = 210697-698 column down Ac
Author             = delta
Experiment         = carbon.jxp
Sample_Id          = 210697-698 column down Ac
Solvent            = ACETONE-D6
Actual_Start_Time  = 12-FEB-2023 17:08:59
Revision_Time      = 17-MAR-2023 16:53:20

Comment           = single pulse decoupled ga
Data_Format       = 1D COMPLEX
Dim_Size          = 26214
X_Domain          = Carbon
Dim_Title         = Carbon13
Dim_Units         = [ppm]
Dimensions        = X
Site              = ECS 400
Spectrometer      = DELTA2_NMR

Field_Strength    = 9.389766[T] (400[MHz])
X_Acq_Duration    = 1.04333312[s]
X_Domain          = 13C
X_Freq            = 100.52530333[MHz]
X_Offset          = 100[ppm]
X_Points          = 32768
X_Prescans        = 4
X_Resolution      = 0.95846665[Hz]
X_Sweep           = 31.40703518[kHz]
X_Sweep_Clipped  = 25.12562814[kHz]
Irr_Domain        = Proton
Irr_Freq          = 399.78219838[MHz]
Irr_Offset        = 5[ppm]
Clipped           = FALSE
Scans             = 1512
Total_Scans       = 1512

Relaxation_Delay  = 2[s]
Recvr_Gain        = 50
Temp_Get          = 20.1[dC]
X_90_Width        = 9[us]
X_Acq_Time        = 1.04333312[s]
X_Angle           = 30[deg]
X_Atn             = 4.7[dB]
X_Pulse           = 3[us]
Irr_Atn_Dec       = 22.346[dB]
Irr_Atn_Noise    = 22.346[dB]
Irr_Noise         = WALTZ
Irr_Pwidth        = 0.115[ms]
Decoupling        = TRUE
Initial_Wait      = 1[s]
Noe               = TRUE
Noe_Time          = 2[s]
Repetition_Time   = 3.04333312[s]

```

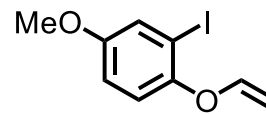

# S13

```

---- PROCESSING PARAMETERS ----
dc balance( 0, FALSE )
sexp( 0.2[Hz], 0.0[s] )
trapezoid( 0[8], 0[8], 80[8], 100[8] )
zerofill( 1, TRUE )
fft( 1, TRUE, TRUE )
machinephase
ppm

Filename           = 32 Ar 4-OMe CDC13_Proton-
Author             = delta
Experiment         = proton.jxp
Sample Id          = 210679 column CDC13
Solvent            = CHLOROFORM-D
Actual Start Time  = 25-JAN-2023 11:00:18
Revision Time     = 30-JAN-2023 17:42:18

Comment           = single pulse
Data Format        = 1D COMPLEX
Dim Size          = 13107
X_Domain          = Proton
Dim Title         = Proton
Dim Units         = [ppm]
Dimensions        = X
Site              = ECS 400
Spectrometer      = DELTA2_NMR

Field Strength    = 9.389766[T] (400[MHz])
X_Acq_Duration   = 2.18365952[s]
X_Domain         = 1H
X_Freq           = 399.78219838[MHz]
X_Offset         = 5[ppm]
X Points         = 16384
X_Prescans       = 1
X_Resolution     = 0.45794685[Hz]
X_Sweep          = 7.5030012[kHz]
X_Sweep_Clipped  = 6.00240096[kHz]
Irr_Domain       = Proton
Irr_Freq         = 399.78219838[MHz]
Irr_Offset       = 5[ppm]
Tri_Domain       = Proton
Tri_Freq         = 399.78219838[MHz]
Tri_Offset       = 5[ppm]
Clipped          = FALSE
Scans            = 8
Total_Scans      = 8

Relaxation_Delay  = 5[s]
Recvr_Gain        = 42
Temp_Get          = 20.3[dc]
X_90_Width       = 12.4[us]
X_Acq_Time       = 2.18365952[s]
X_Angle          = 45[deg]
X_Atn            = 3[dB]
X_Pulse          = 6.2[us]
Irr_Mode         = Off
Tri_Mode         = Off
DanTe_Presat     = FALSE
Initial Wait     = 1[s]
Repetition Time  = 7.18365952[s]

```

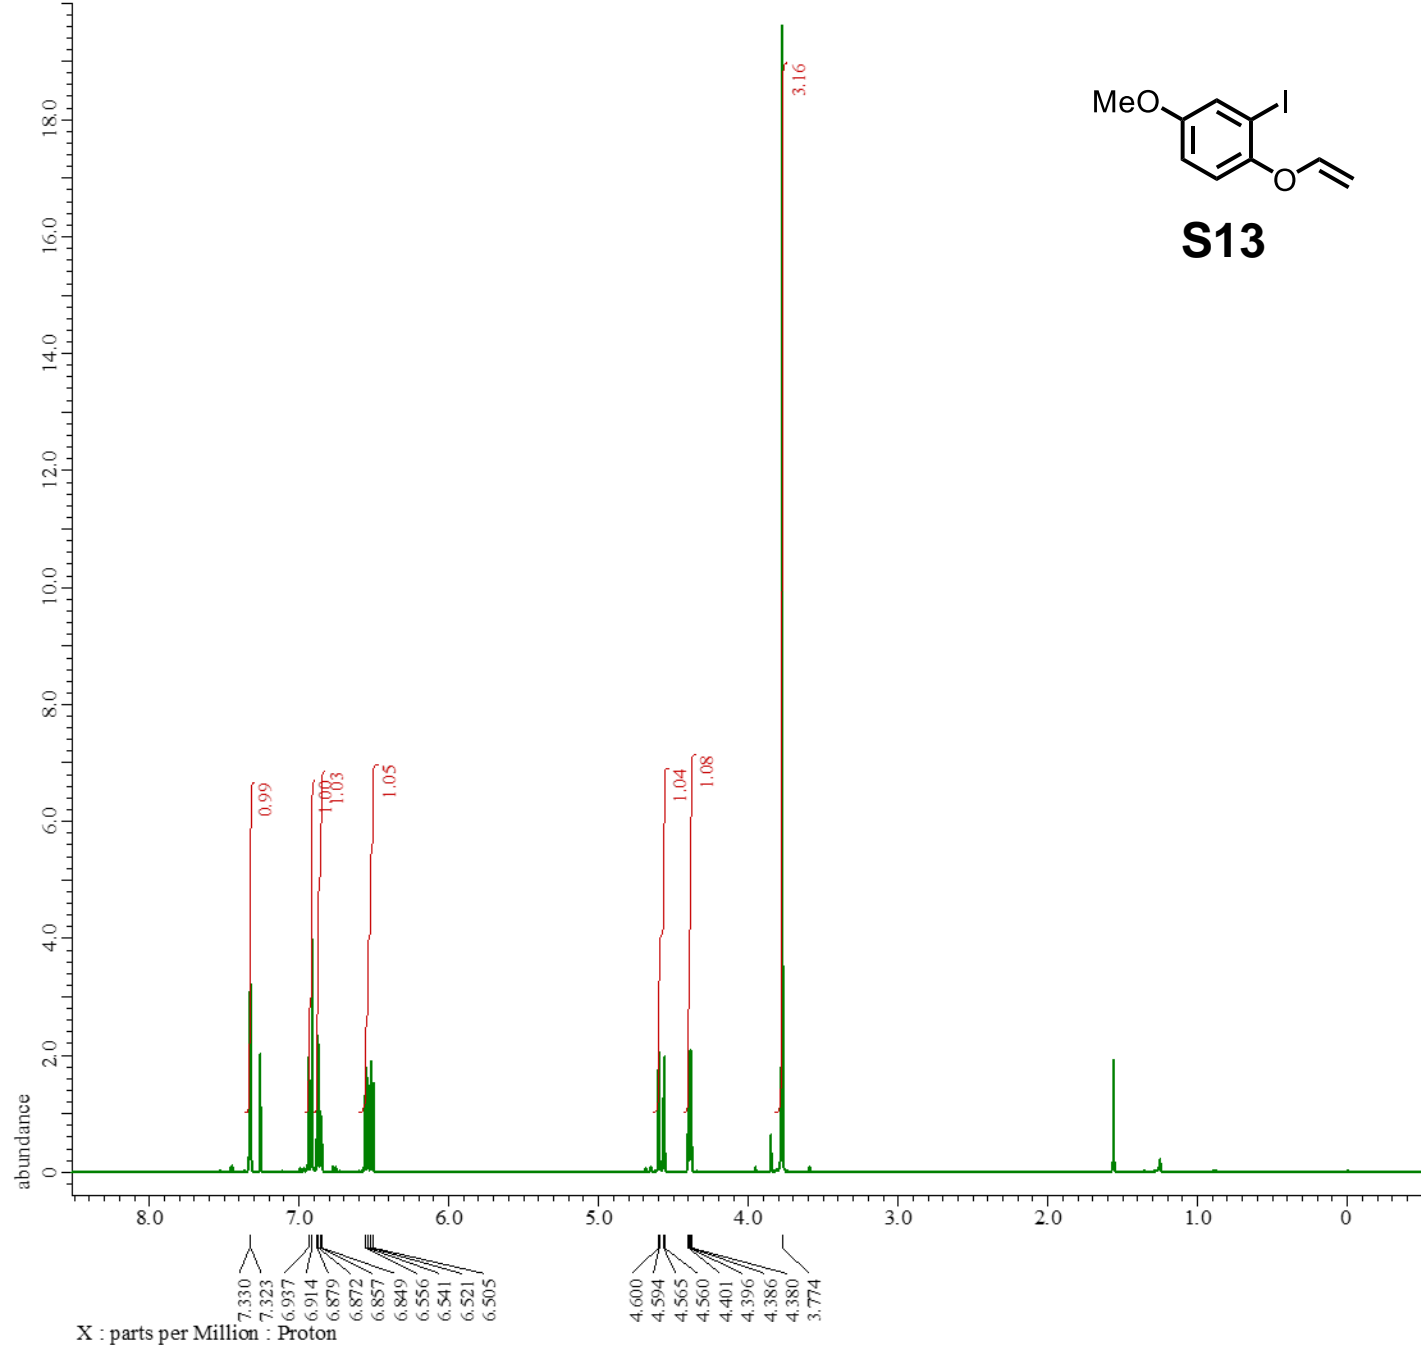

<sup>1</sup>H NMR spectrum of S13 (400 MHz, CDCl<sub>3</sub>)

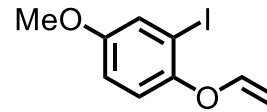

**S13**

```

---- PROCESSING PARAMETERS ----
dc balance( 0, FALSE )
sexp( 2.0[Hz], 0.0[s] )
trapezoid( 0[8], 0[8], 80[8], 100[8] )
zerofill( 1, TRUE )
fft( 1, TRUE, TRUE )
machinephase
ppm

```

```

Filename      = 32 Ar 4-OMe CDC13_Carbon
Author       = delta
Experiment    = carbon.jxp
Sample Id     = 210679 column CDC13
Solvent      = CHLOROFORM-D
Actual Start Time = 25-JAN-2023 10:06:48
Revision Time  = 17-MAR-2023 10:33:14

```

```

Comment      = single pulse decoupled ga
Data Format   = 1D COMPLEX
Dim Size     = 26214
X_Domain     = Carbon
Dim Title    = Carbon13
Dim Units    = [ppm]
Dimensions   = X
Site         = ECS 400
Spectrometer = DELTA2_NMR

```

```

Field Strength = 9.389766[T] (400[MHz])
X_Acq_Duration = 1.0433312[s]
X_Domain       = 13C
X_Freq         = 100.52530333[MHz]
X_Offset       = 100[ppm]
X Points       = 32768
X_Prescans     = 4
X_Resolution   = 0.95846665[Hz]
X_Sweep        = 31.40703518[kHz]
X_Sweep_Clippped = 25.12562814[kHz]
Irr_Domain     = Proton
Irr_Freq       = 399.78219838[MHz]
Irr_Offset     = 5[ppm]
Clipped        = FALSE
Scans          = 1024
Total_Scans    = 1024

```

```

Relaxation Delay = 2[s]
Recvr Gain       = 50
Temp_Get         = 20.6[dC]
X_90_Width      = 9[us]
X_Acq_Time      = 1.0433312[s]
X_Angle         = 30[deg]
X_Atn           = 4.7[dB]
X_Pulse         = 3[us]
Irr_Atn_Dec     = 22.346[dB]
Irr_Atn_No     = 22.346[dB]
Irr_Noise       = WALTZ
Irr_Pwidth      = 0.115[ms]
Decoupling      = TRUE
Initial_Wait    = 1[s]
Noe             = TRUE
Noe Time        = 2[s]
Repetition Time = 3.0433312[s]

```

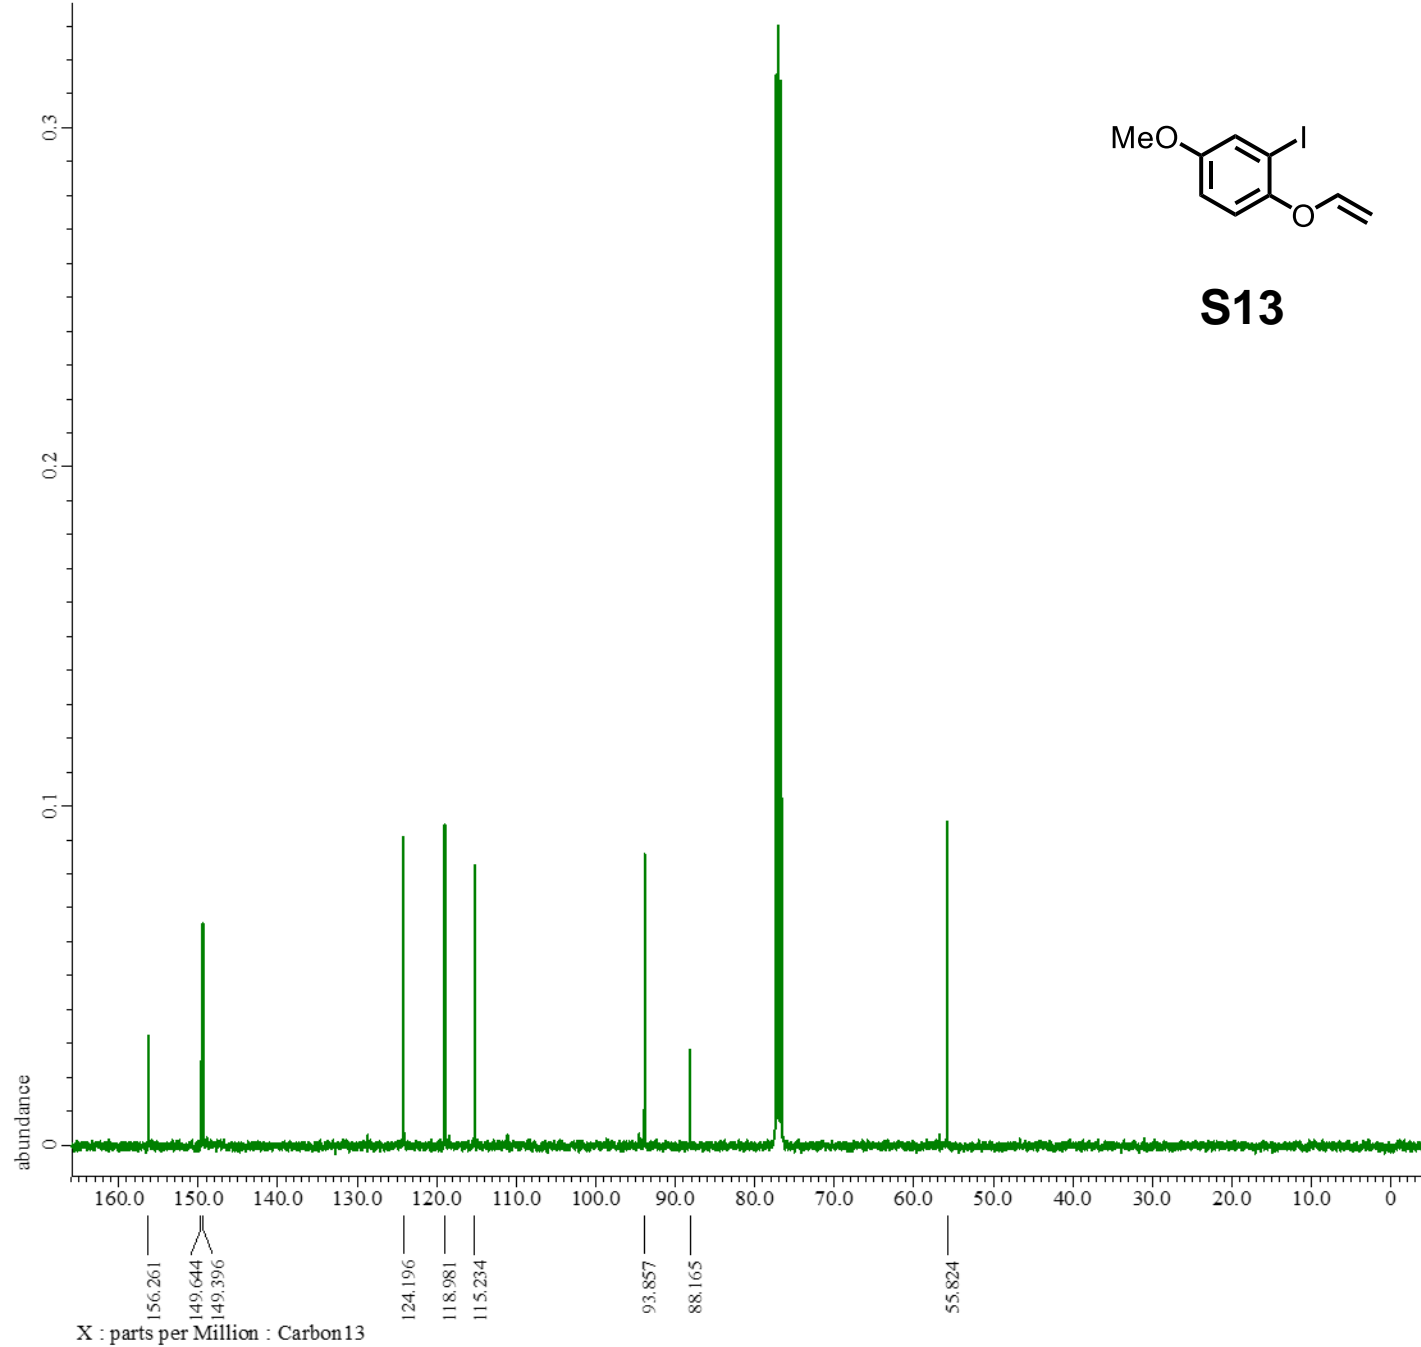

X : parts per Million : Carbon13

**S83**

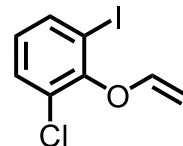

**S14**

```

---- PROCESSING PARAMETERS ----
dc balance( 0, FALSE )
sexp( 0.2[Hz], 0.0[s] )
trapezoid( 0[8], 0[8], 80[8], 100[8] )
zerofill( 1, TRUE )
fft( 1, TRUE, TRUE )
machinephase
ppm

```

```

Filename      = 30 Ar 6-Cl CDC13_Proton-1
Author       = delta
Experiment   = proton.jxp
Sample Id    = 210642 column 2 CDC13
Solvent      = CHLOROFORM-D
Actual Start Time = 14-DEC-2022 20:54:08
Revision Time   = 18-JAN-2023 17:54:17

```

```

Comment      = single pulse
Data Format   = 1D COMPLEX
Dim Size     = 13107
X_Domain     = Proton
Dim Title    = Proton
Dim Units    = [ppm]
Dimensions   = X
Site         = ECS 400
Spectrometer = DELTA2_NMR

Field Strength = 9.389766[T] (400[MHz])
X_Acq_Duration = 2.18365952[s]
X_Domain       = 1H
X_Freq        = 399.78219838[MHz]
X_Offset      = 5[ppm]
X Points      = 16384
X_Prescans    = 1
X_Resolution  = 0.45794685[Hz]
X_Sweep       = 7.5030012[kHz]
X_Sweep_Clipped = 6.00240096[kHz]
Irr_Domain    = Proton
Irr_Freq     = 399.78219838[MHz]
Irr_Offset    = 5[ppm]
Tri_Domain    = Proton
Tri_Freq     = 399.78219838[MHz]
Tri_Offset    = 5[ppm]
Clipped       = FALSE
Scans         = 8
Total_Scans   = 8

```

```

Relaxation_Delay = 5[s]
Recvr_Gain       = 46
Temp_Get         = 20.7[dc]
X_90_Width      = 12.4[us]
X_Acq_Time      = 2.18365952[s]
X_Angle         = 45[deg]
X_Atn           = 3[db]
X_Pulse         = 6.2[us]
Irr_Mode        = Off
Tri_Mode        = Off
Dante_Presat    = FALSE
Initial_Wait    = 1[s]
Repetition_Time = 7.18365952[s]

```

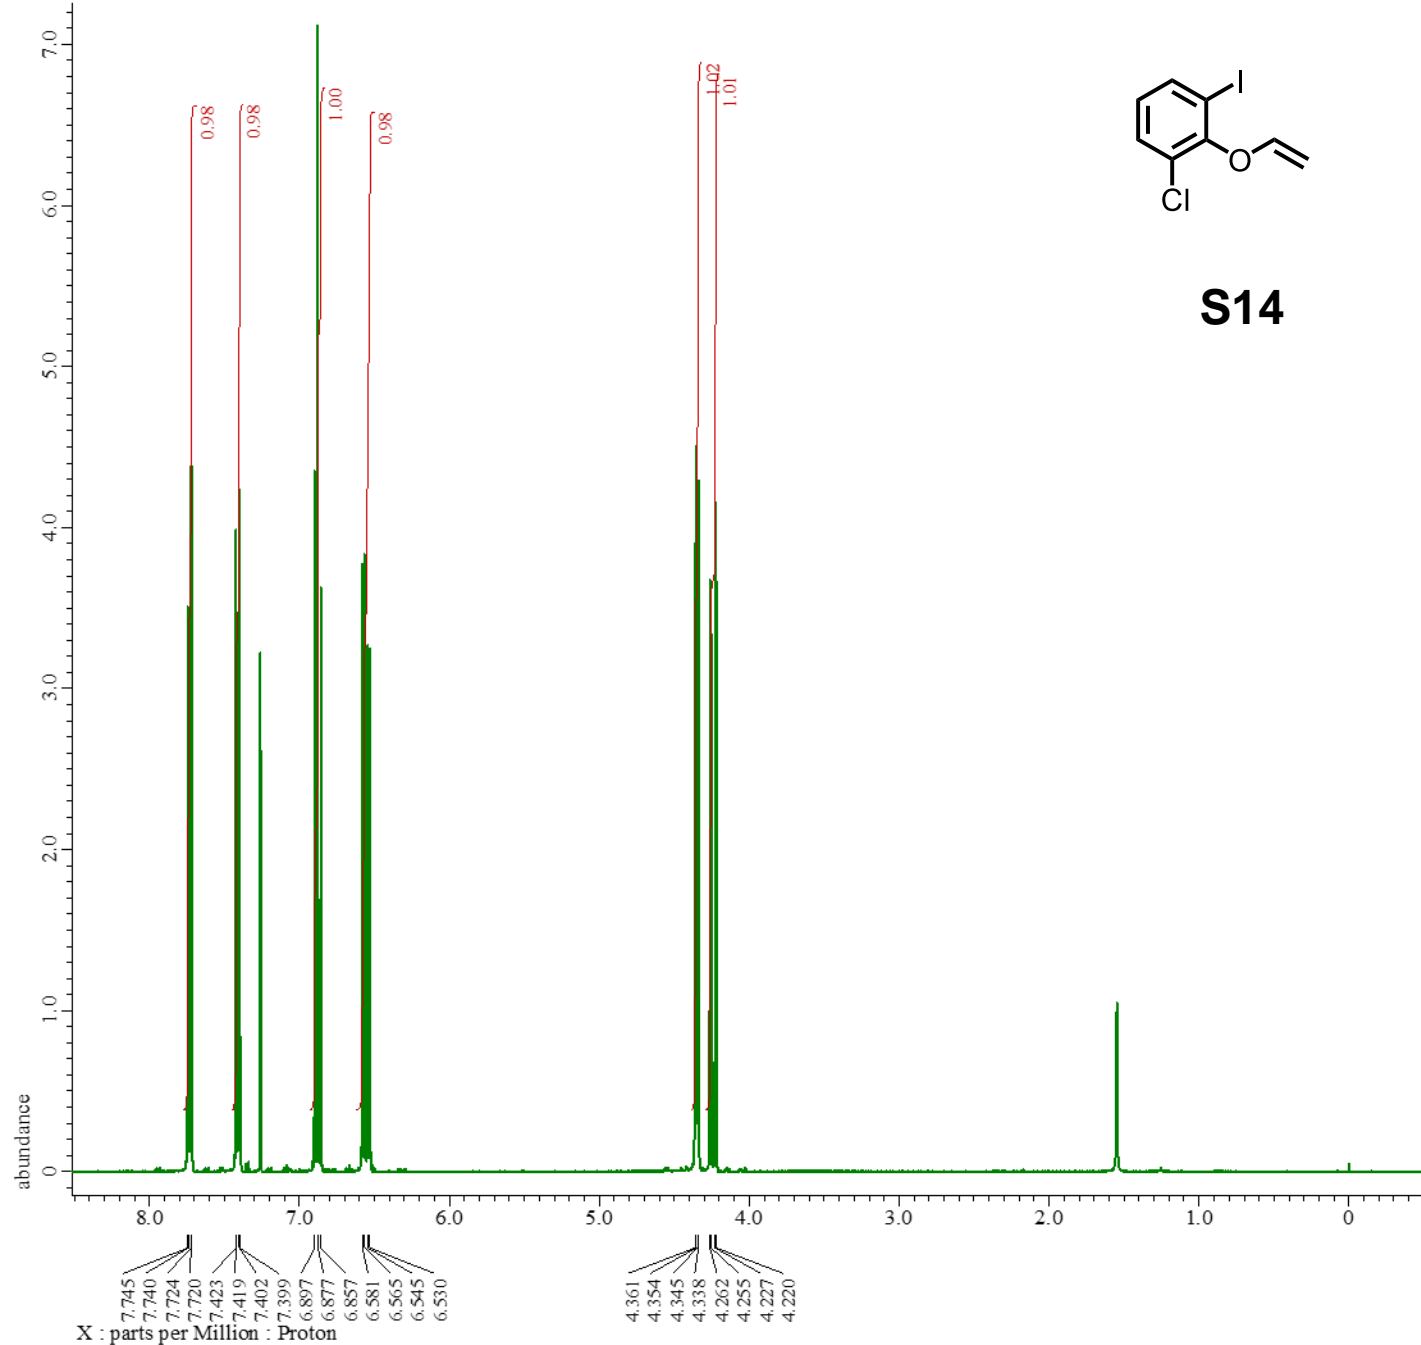



**S14**

```

---- PROCESSING PARAMETERS ----
dc balance( 0, FALSE )
sexp( 2.0[Hz], 0.0[s] )
trapezoid( 0[8], 0[8], 80[8], 100[8] )
zerofill( 1, TRUE )
fft( 1, TRUE, TRUE )
machinephase
ppm

```

```

Filename      = 30 Ar 6-Cl CDC13_Carbon-1
Author       = delta
Experiment   = carbon.jxp
Sample Id    = 210642 column 2 CDC13
Solvent      = CHLOROFORM-D
Actual Start Time = 15-DEC-2022 00:07:05
Revision Time  = 18-JAN-2023 17:57:57

```

```

Comment      = single pulse decoupled ga
Data Format   = 1D COMPLEX
Dim Size     = 26214
X_Domain     = Carbon
Dim Title    = Carbon13
Dim Units    = [ppm]
Dimensions   = X
Site         = ECS 400
Spectrometer = DELTA2_NMR

```

```

Field Strength = 9.389766[T] (400[MHz])
X_Acq_Duration = 1.04333312[s]
X_Domain       = 13C
X_Freq        = 100.52530333[MHz]
X_Offset      = 100[ppm]
X Points      = 32768
X_Prescans    = 4
X_Resolution  = 0.95846665[Hz]
X_Sweep       = 31.40703518[kHz]
X_Sweep_Clip  = 25.12562814[kHz]
Irr_Domain    = Proton
Irr_Freq      = 399.78219838[MHz]
Irr_Offset    = 5[ppm]
Clipped       = FALSE
Scans         = 1024
Total_Scans   = 1024

```

```

Relaxation Delay = 2[s]
Recvr Gain       = 50
Temp_Get         = 21.3[dC]
X_90_Width      = 9[us]
X_Acq_Time      = 1.04333312[s]
X_Angle         = 30[deg]
X_Atn           = 4.7[dB]
X_Pulse         = 3[us]
Irr_Atn_Dec     = 22.346[dB]
Irr_Atn_No     = 22.346[dB]
Irr_Noise       = WALTZ
Irr_Pwidth      = 0.115[ms]
Decoupling      = TRUE
Initial_Wait    = 1[s]
Noe              = TRUE
Noe Time        = 2[s]
Repetition Time = 3.04333312[s]

```

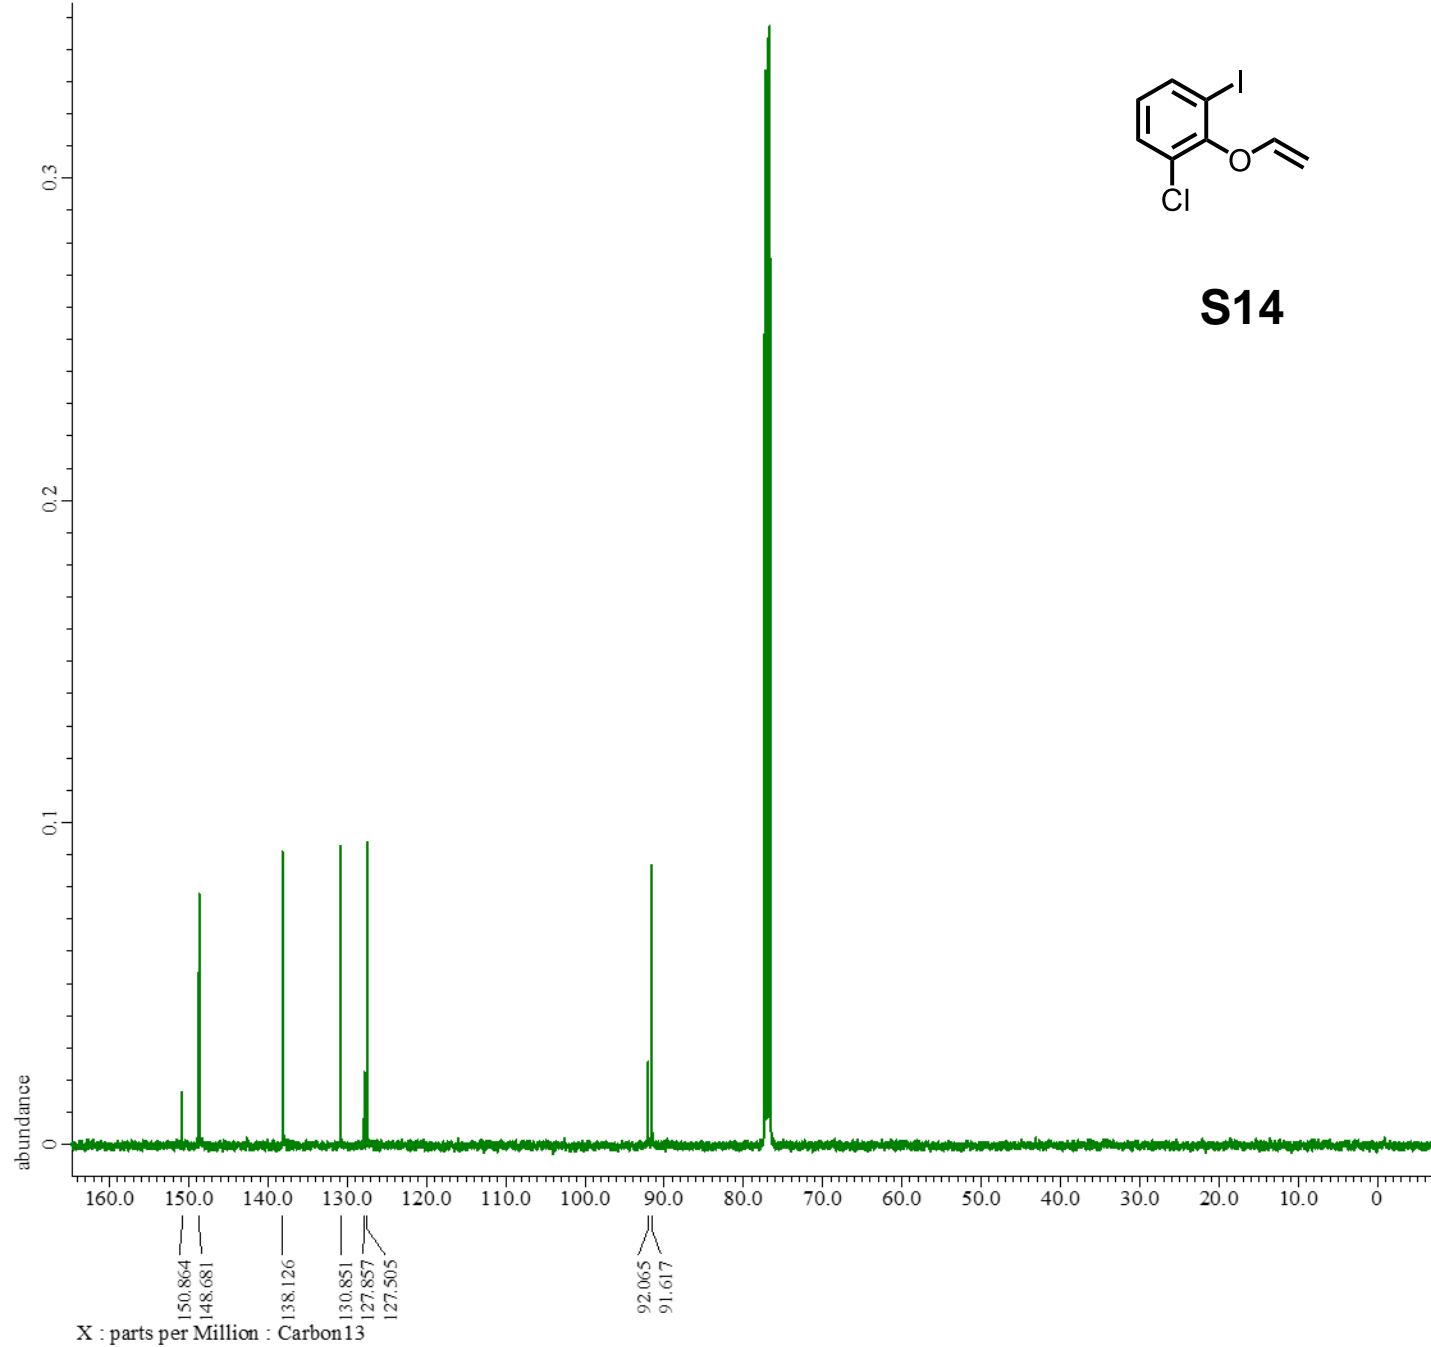

**S85**

<sup>13</sup>C NMR spectrum of **S14** (101 MHz, CDCl<sub>3</sub>)

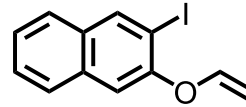

**S15**

```

---- PROCESSING PARAMETERS ----
dc balance( 0, FALSE )
sexp( 0.2[Hz], 0.0[s] )
trapezoid( 0[8], 0[8], 80[8], 100[8] )
zerofill( 1, TRUE )
fft( 1, TRUE, TRUE )
machinephase
ppm

Filename      = 29 Ar 2,3-naphthyl CDC13_
Author       = delta
Experiment   = proton.jxp
Sample Id    = 210433 column CDC13
Solvent      = CHLOROFORM-D
Actual Start Time = 30-JUN-2022 15:35:17
Revision Time   = 18-JAN-2023 20:22:10

Comment      = single pulse
Data Format   = 1D COMPLEX
Dim Size     = 13107
X_Domain     = Proton
Dim Title    = Proton
Dim Units    = [ppm]
Dimensions   = X
Site         = JNM-ECA500
Spectrometer = DELTA2_NMR

Field Strength = 11.7473579 [T] (500[MHz])
X_Acq_Duration = 1.74587904 [s]
X_Domain       = 1H
X_Freq         = 500.15991521[MHz]
X_Offset      = 5.0 [ppm]
X Points      = 16384
X_Prescans    = 1
X_Resolution  = 0.57277737 [Hz]
X_Sweep       = 9.38438438 [kHz]
X_Sweep_Clipped = 7.50750751 [kHz]
Irr_Domain    = Proton
Irr_Freq      = 500.15991521[MHz]
Irr_Offset    = 5.0 [ppm]
Tri_Domain    = Proton
Tri_Freq      = 500.15991521[MHz]
Tri_Offset    = 5.0 [ppm]
Clipped       = FALSE
Scans         = 8
Total_Scans   = 8

Relaxation_Delay = 5 [s]
Recvr_Gain       = 50
Temp_Get         = 20.5 [dC]
X_90_Width      = 13 [us]
X_Acq_Time      = 1.74587904 [s]
X_Angle         = 45 [deg]
X_Atn           = 3.6 [dB]
X_Pulse         = 6.5 [us]
Irr_Mode        = Off
Tri_Mode        = Off
DanTe_Presat    = FALSE
Initial_Wait    = 1 [s]
Repetition_Time = 6.74587904 [s]

```

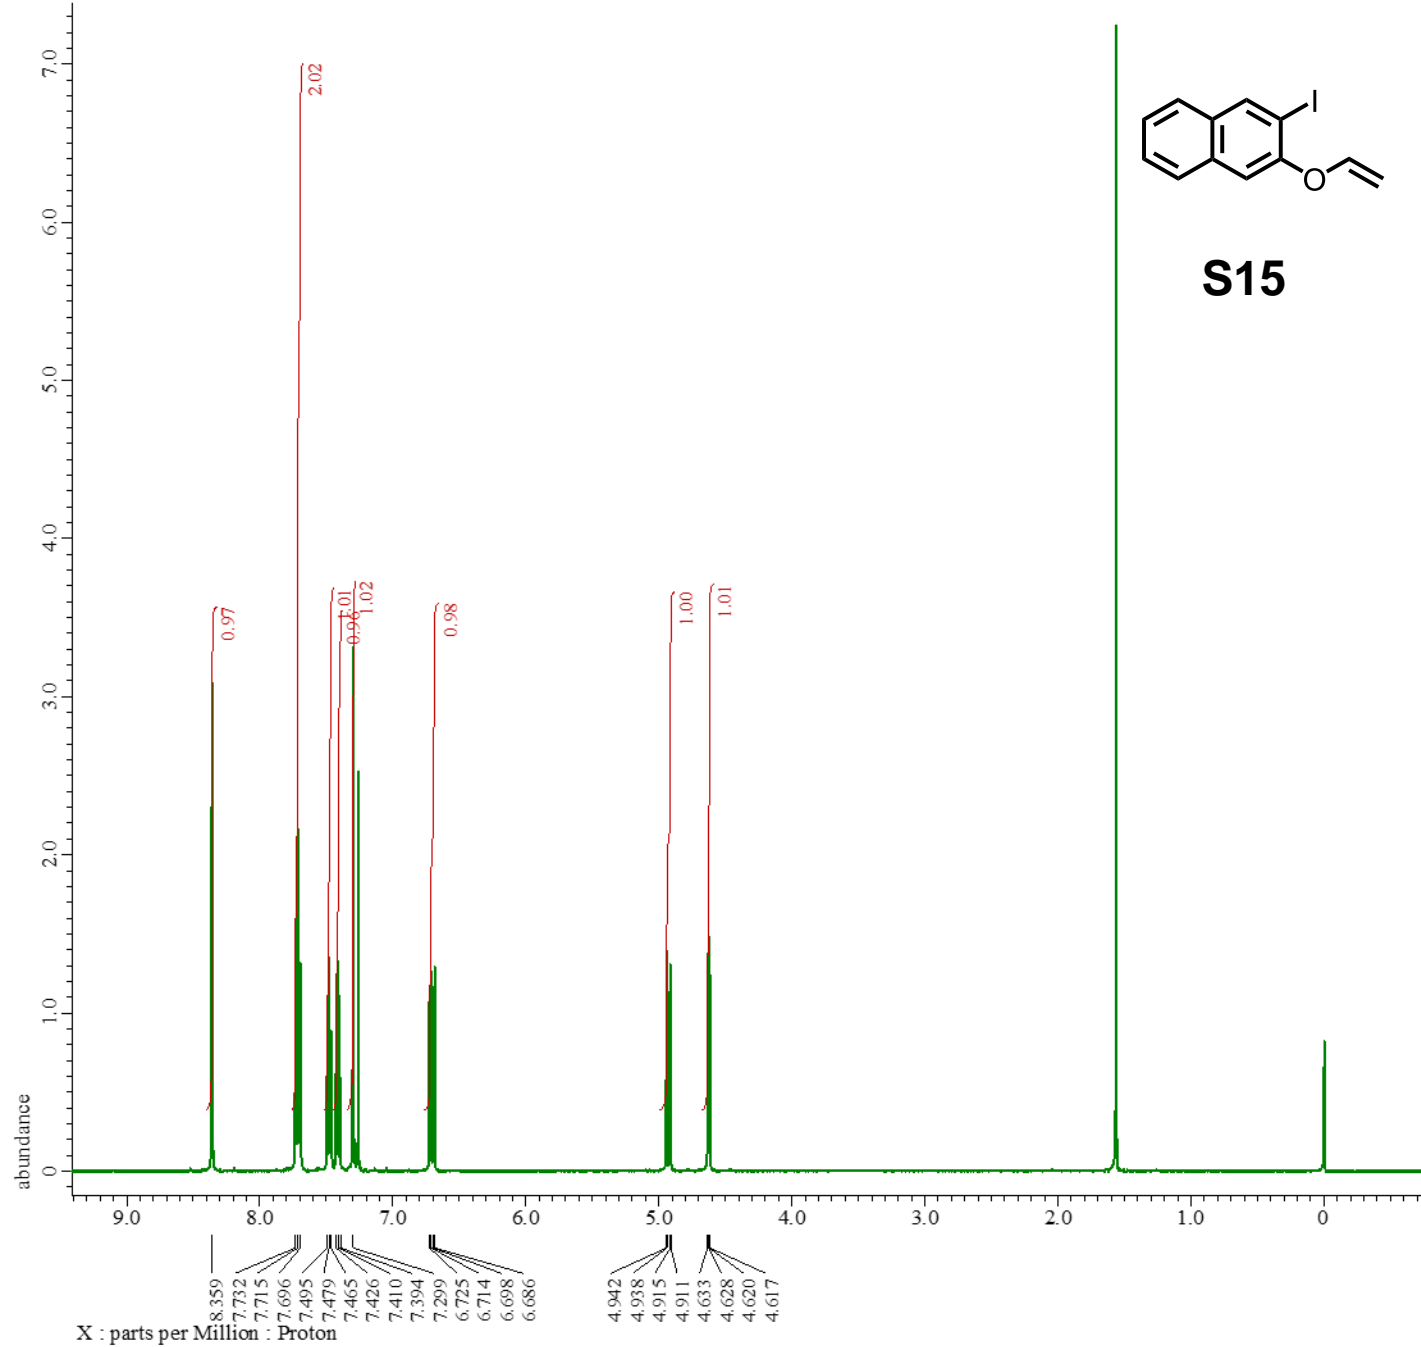

**S86**

<sup>1</sup>H NMR spectrum of **S15** (500 MHz, CDCl<sub>3</sub>)

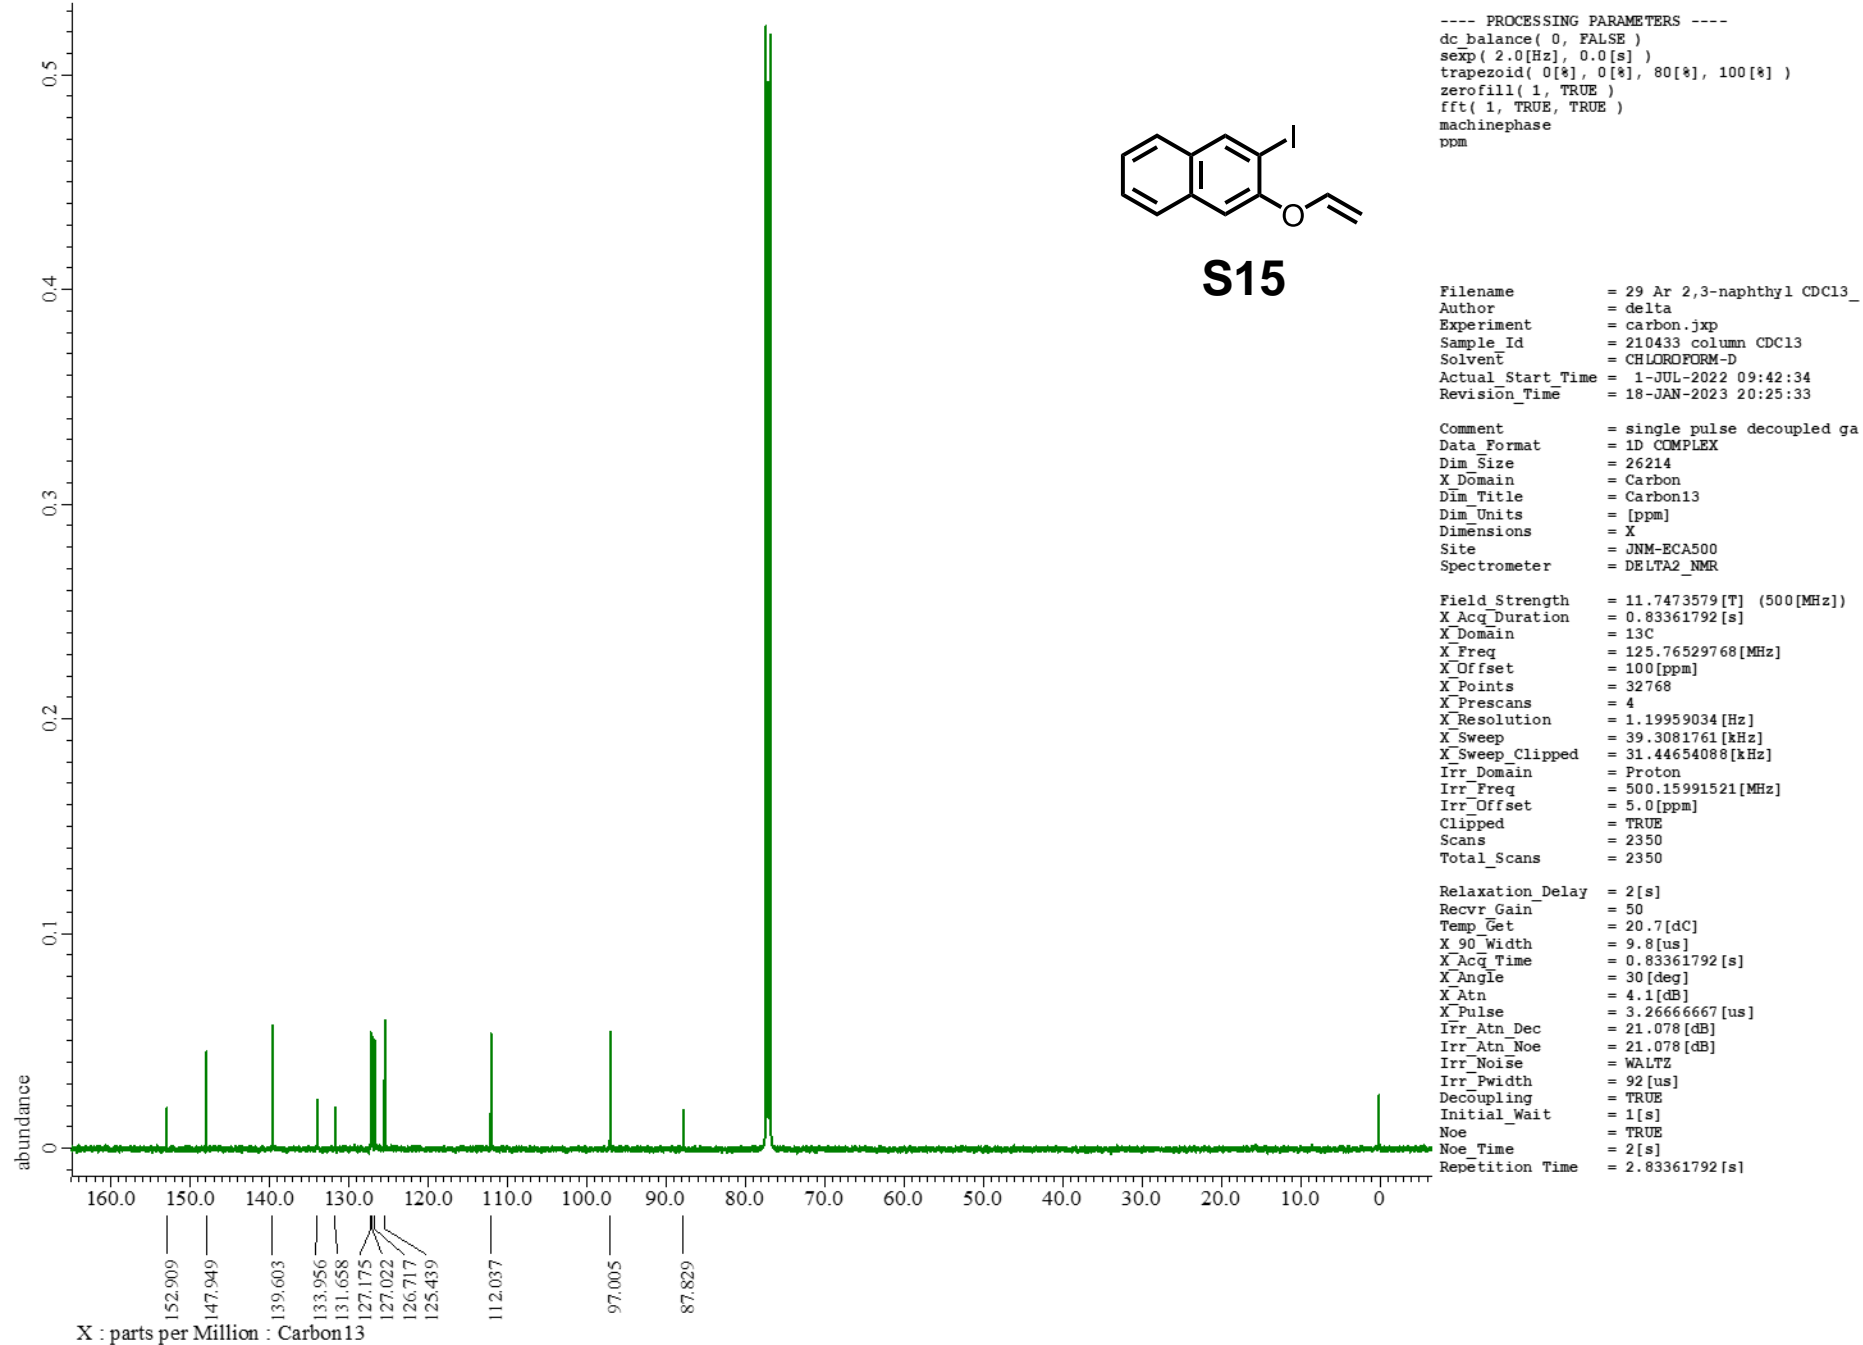

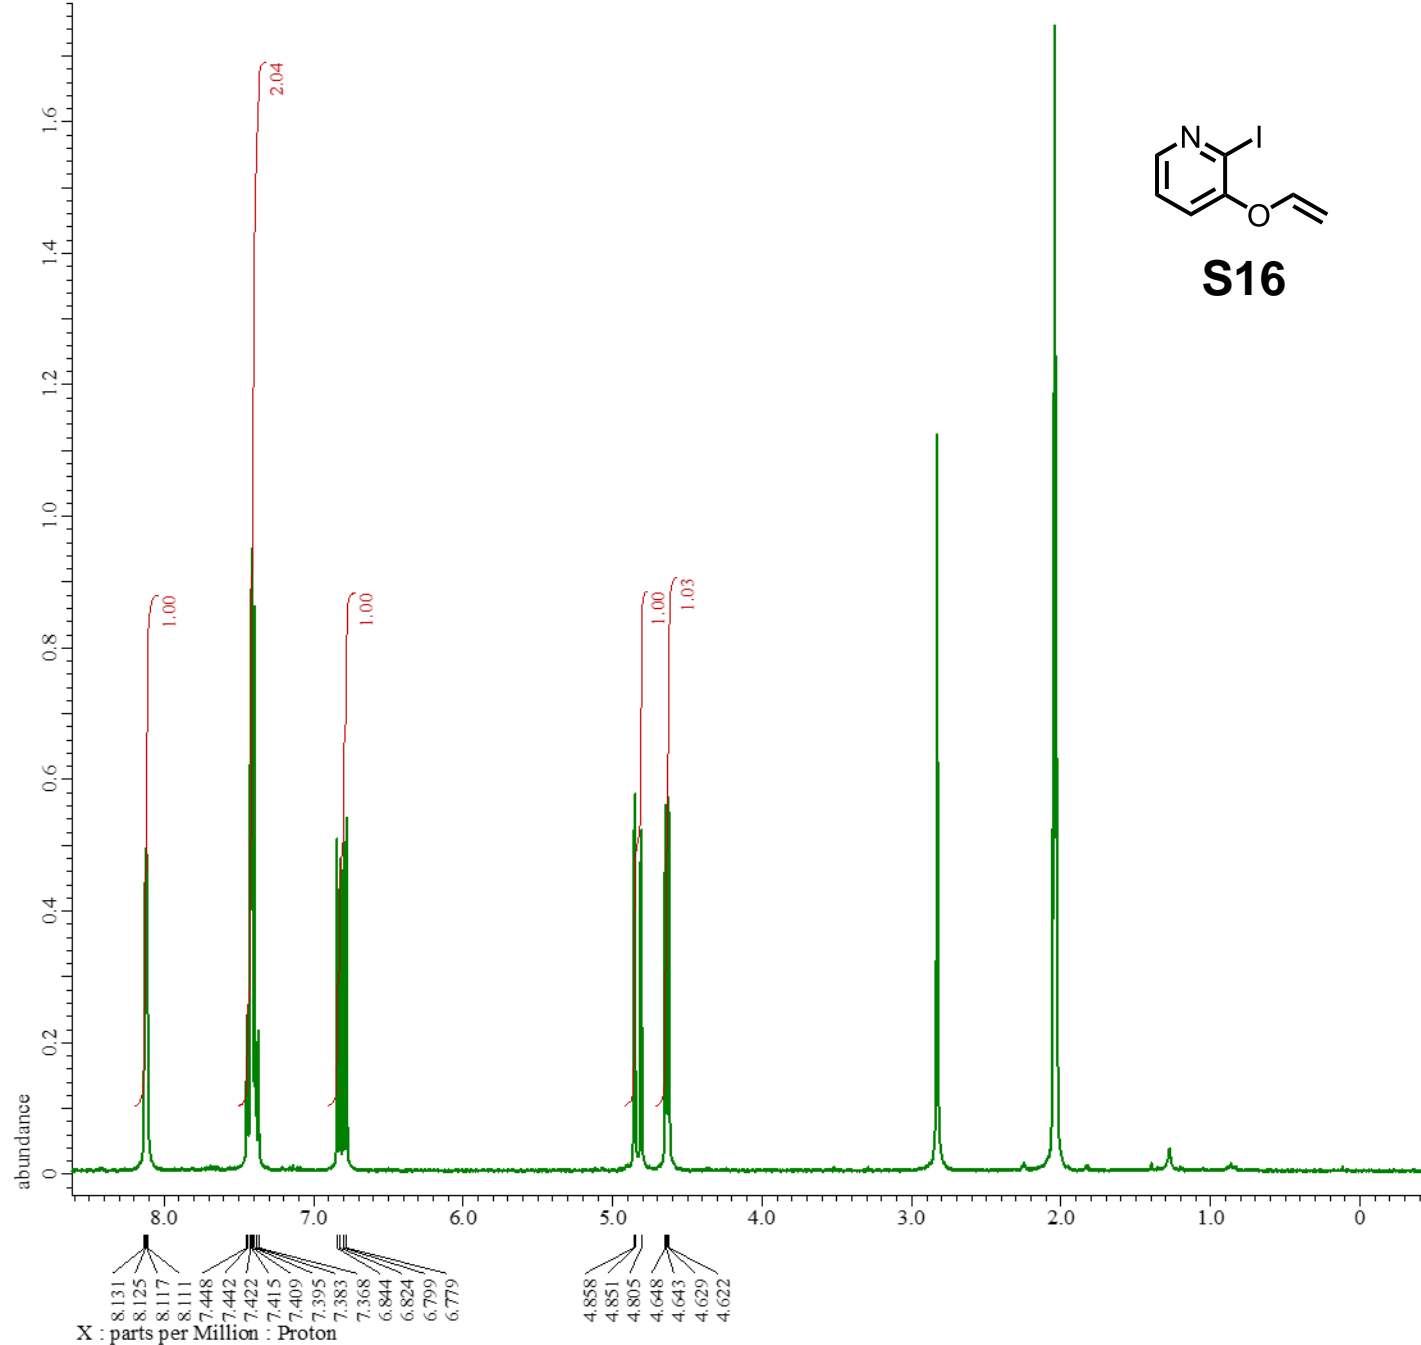

```

---- PROCESSING PARAMETERS ----
dc balance( 0, FALSE )
sexp( 0.2[Hz], 0.0[s] )
trapezoid( 0[8], 0[8], 80[8], 100[8] )
zerofill( 1, TRUE )
fft( 1, TRUE, TRUE )
machinephase
ppm

Filename      = 31 Ar pyridine Acetone-d6
Author       = delta
Experiment   = proton.jxp
Sample Id    = pyridine vinyloxy check A
Solvent      = ACETONE-D6
Actual Start Time = 19-JAN-2023 11:45:33
Revision Time   = 19-JAN-2023 16:52:44

Comment      = single pulse
Data Format   = 1D COMPLEX
Dim Size     = 13107
X_Domain     = Proton
Dim Title    = Proton
Dim Units    = [ppm]
Dimensions   = X
Site         = ECS 300
Spectrometer = DELTA2_NMR

Field Strength = 7.0586013[T] (300 [MHz])
X_Acq_Duration = 2.90717696 [s]
X_Domain       = 1H
X_Freq         = 300.52965592 [MHz]
X_Offset       = 5 [ppm]
X_Points       = 16384
X_Prescans     = 1
X_Resolution   = 0.34397631 [Hz]
X_Sweep        = 5.63570784 [kHz]
X_Sweep_Clippped = 4.50856628 [kHz]
Irr_Domain     = Proton
Irr_Freq       = 300.52965592 [MHz]
Irr_Offset     = 5 [ppm]
Tri_Domain     = Proton
Tri_Freq       = 300.52965592 [MHz]
Tri_Offset     = 5 [ppm]
Clipped       = FALSE
Scans          = 8
Total_Scans   = 8

Relaxation Delay = 5 [s]
Recvr_Gain       = 44
Temp_Get         = 18.8 [dC]
X_90_Width      = 11 [us]
X_Acq_Time      = 2.90717696 [s]
X_Angle         = 45 [deg]
X_Atn           = 1 [dB]
X_Pulse         = 5.5 [us]
Irr_Mode        = Off
Tri_Mode        = Off
Dante_Presat    = FALSE
Initial Wait    = 1 [s]
Repetition Time = 7.90717696 [s]

```

<sup>1</sup>H NMR spectrum of S16 (301 MHz, Acetone-d<sub>6</sub>)



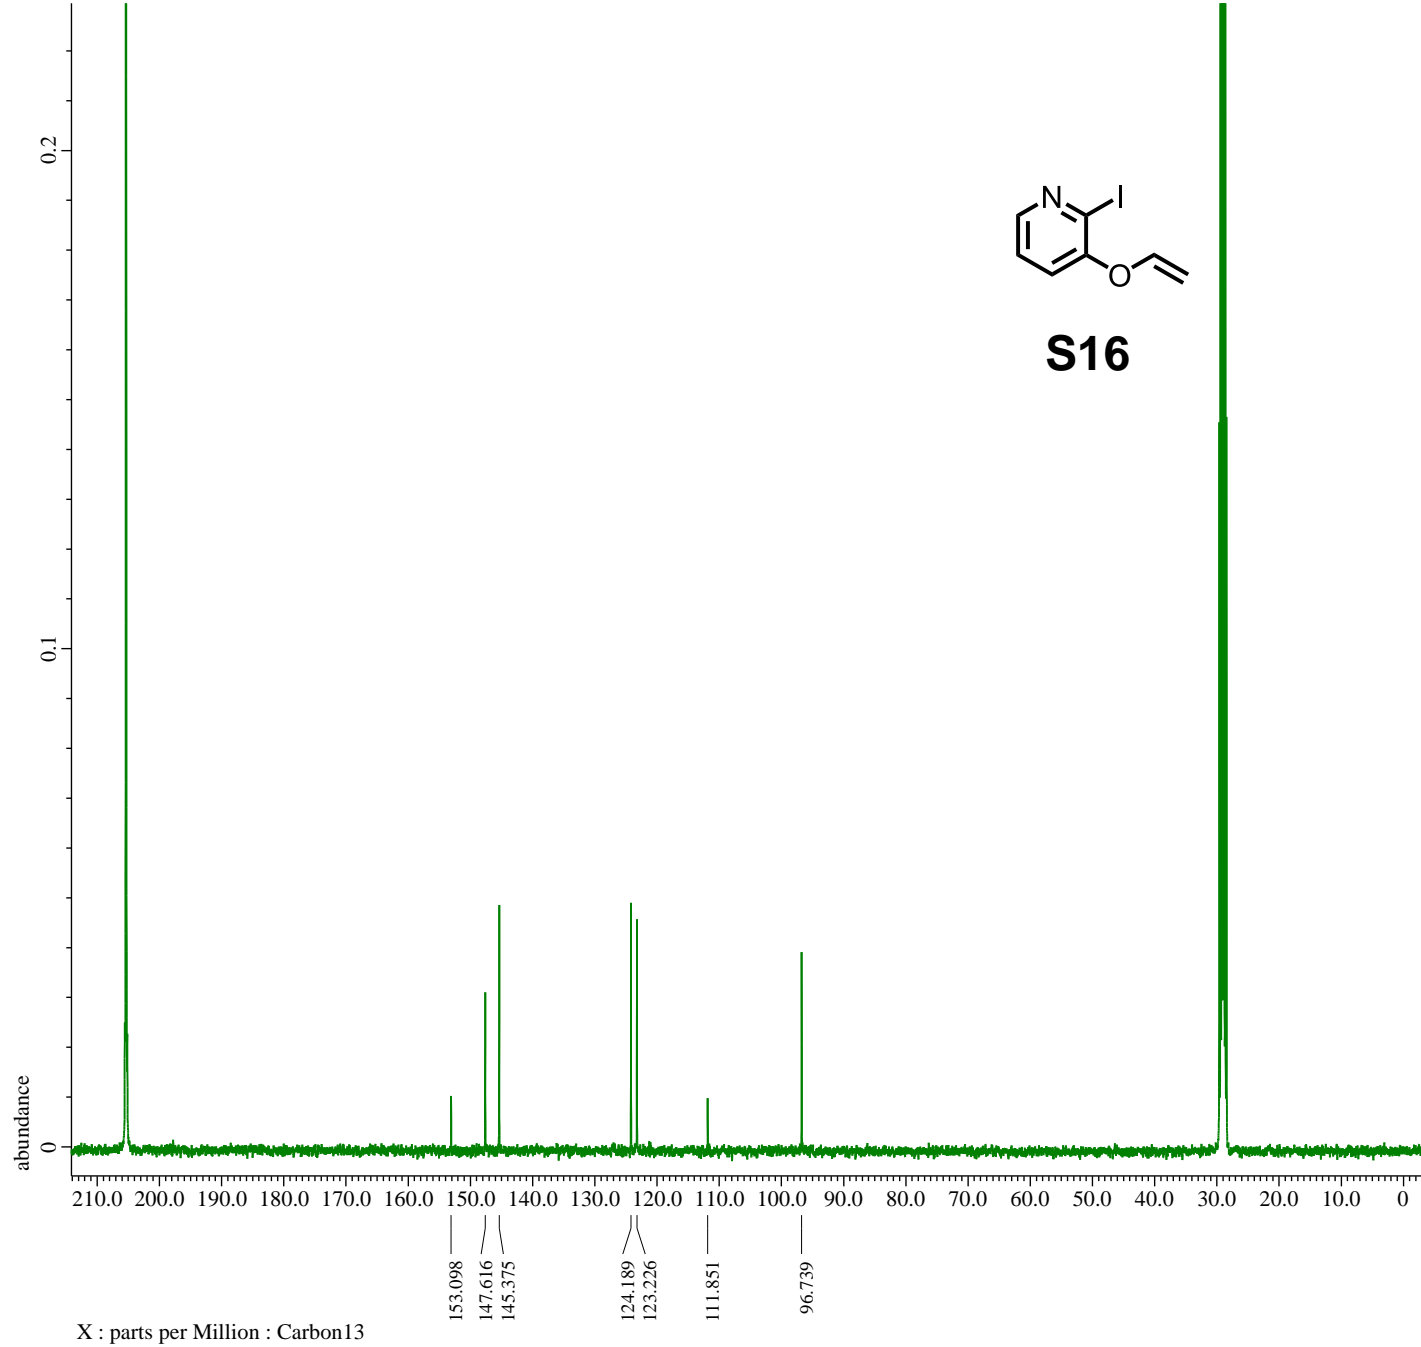

```

---- PROCESSING PARAMETERS ----
dc_balance( 0, FALSE )
sexp( 2.0[Hz], 0.0[s] )
trapezoid( 0[%], 0[%], 80[%], 100[%] )
zerofill( 1, TRUE )
fft( 1, TRUE, TRUE )
machinephase
ppm

```

```

Filename      = 31 Ar pyridine Acetone-d6
Author       = delta
Experiment   = carbon.jxp
Sample_Id    = pyridine vinyloxy check A
Solvent      = ACETONE-D6
Actual_Start_Time = 19-JAN-2023 13:03:39
Revision_Time   = 17-MAR-2023 16:55:06

```

```

Comment      = single pulse decoupled ga
Data Format   = 1D COMPLEX
Dim_Size     = 26214
X_Domain     = Carbon
Dim_Title    = Carbon13
Dim_Units    = [ppm]
Dimensions   = X
Site         = ECS 400
Spectrometer = DELTA2_NMR

```

```

Field Strength = 9.389766[T] (400[MHz])
X_Acq_Duration = 1.04333312[s]
X_Domain       = 13C
X_Freq         = 100.52530333[MHz]
X_Offset       = 100[ppm]
X_Points       = 32768
X_Prescans     = 4
X_Resolution   = 0.95846665[Hz]
X_Sweep        = 31.40703518[kHz]
X_Sweep_Clipped = 25.12562814[kHz]
Irr_Domain     = Proton
Irr_Freq       = 399.78219838[MHz]
Irr_Offset     = 5[ppm]
Clipped        = FALSE
Scans          = 1650
Total_Scans    = 1650

```

```

Relaxation_Delay = 2[s]
Recvr_Gain       = 50
Temp_Get         = 19.8[dC]
X_90_Width      = 9[us]
X_Acq_Time       = 1.04333312[s]
X_Angle          = 30[deg]
X_Atn            = 4.7[dB]
X_Pulse         = 3[us]
Irr_Atn_Dec     = 22.346[dB]
Irr_Atn_Noise   = 22.346[dB]
Irr_Noise       = WALTZ
Irr_Pwidth      = 0.115[ms]
Decoupling      = TRUE
Initial_Wait    = 1[s]
Noe              = TRUE
Noe_Time        = 2[s]
Repetition_Time = 3.04333312[s]

```

<sup>13</sup>C NMR spectrum of S16 (101 MHz, Acetone-d<sub>6</sub>)
